# Supplementary material for: Non-targeted metabolomics unravels a media-dependent prodiginines production pathway in Streptomyces coelicolor A3(2)
Source: PLoS One. 2018 Nov 28;13(11):e0207541. doi: 10.1371/journal.pone.0207541 (PMC6261592; doi:10.1371/journal.pone.0207541)
Supplement: S1 File — The raw data sets of GC-TOF-MS were converted to the Net CDF format (*.cdf) using the LECO Chroma TOF software (version 4.44, LECO Corpo). Converted CDF data were preprocessed with the MetAlign software package (http://www.metalign.nl) for peak detection, retention time correction, and alignment. The resulting data, including sample names and peak area information as variables, were exported to an Excel file. (XLSX) [file pone.0207541.s008.xlsx]

## Sheet: End_result_amplitudes
Peak Nr	Scan Nr	Ret(umin)	Mass	Mass_Scan	Qc_2	Qc_4	Qc_6	W2a_1	W2b_1	W2c_1	W2d_1	W2e_1	W2f_1	W3a_1	W3b_1	W3c_1	W3d_1	W3e_1	W3f_1	W4a_1	W4b_1	W4c_2	W4d_1	W4e_1	W4f_1	W5a_1	W5b_1	W5c_1	W5d_1	W5e_1	W5f_1	W6a_1	W6b_1	W6c_1	W6d_1	W6e_1	W6f_1	W7a_1	W7b_1	W7c_1	W7d_1	W7e_1	W7f_1
1	29	4046667	45	45_ 29	1292046	1318938	1327905	1137655	1071783	1413123	1221939	1369864	3	1322759	1430099	1257846	1333686	1290236	1385681	1026730	1350042	1407688	22196	1353210	1351265	1406959	1233882	1343427	1463665	1437411	1215252	2	1299415	1424684	1379375	1411943	1345081	1328458	1208827	1210862	1420613	1336194	1397535
2	92	4151667	45	45_ 92	53789	76139	3	23714	2	3	299395	273876	482046	2	1330	3	148442	2	100240	168021	131471	3	2	29920	38644	1918	930	3	9228	38797	2	3	88091	2	3	2	3	2	3	2	3	2	3
3	137	4226666	45	45_ 137	343300	321850	491058	139449	187869	188037	304005	231122	245106	217173	372947	275702	256697	347214	285452	346776	363260	412759	461379	268116	445503	530876	479788	530228	334624	701517	933955	585629	370825	512557	741520	877358	1005980	517688	573078	662314	838648	863936	985668
4	196	4325000	45	45_ 196	11145	14247	22080	5277	3161	2134	23716	23476	32433	2596	5692	3235	23328	3879	30260	27436	28959	5362	2765	26132	32544	5288	3278	5082	6784	29023	23490	3084	8444	68985	17226	23059	23416	2998	4006	4432	17098	17020	12647
5	271	4450000	45	45_ 271	100491	102648	172737	175875	210695	160689	146799	235048	187648	149666	193115	145121	160272	137732	170649	191518	372413	156297	146072	164377	250099	181231	151165	148607	118435	176921	178622	155783	182003	220813	181694	175571	192200	139988	210979	160954	188487	159245	180937
6	312	4518333	45	45_ 312	19155	27466	45092	40645	51136	56491	70772	42565	34949	24334	68625	51510	16702	38734	44409	82760	79688	34019	37027	45147	40532	46331	45024	38040	56503	44446	36762	13427	57944	58545	65617	59169	83834	41497	46921	30981	61896	75351	54670
7	362	4601666	45	45_ 362	18099	20188	24655	34687	36898	35420	26084	25596	36177	2059	5263	6728	17946	2171	42595	26329	15857	4122	1484	40155	17572	4139	2687	2557	2411	5531	5142	3452	12719	30639	5600	2	3	2704	2	1328	3758	3	2
8	415	4690000	45	45_ 415	3408	7012	4057	3632	6433	5079	4149	3	2	4096	7643	3947	3977	4610	3	4245	4035	3841	4933	3575	4754	4546	5016	4084	4348	2	3	4510	9643	9830	2	3397	3889	4700	3645	3833	3	3781	4967
9	527	4876667	45	45_ 527	2	3	2	3	5292	3002	4968	4548	2	3	2	4619	3755	3362	3	5544	2	4680	3	4120	2	4529	4333	3277	3384	3	2	3	6413	2	5008	3651	5905	3166	4419	3	6111	2	4103
10	555	4923333	45	45_ 555	95894	89949	115341	55399	78958	61026	38157	34034	44677	31440	26699	23423	37043	22233	64672	38121	30142	36768	30900	60432	79764	17286	17102	15835	25010	62984	61748	21509	15662	718969	41576	47432	35618	3	30048	2	54233	40050	42465
11	604	5005000	45	45_ 604	44412	3	2	23396	24883	20430	44251	38430	34408	34000	51359	43294	32699	3	46084	42466	38724	24393	21722	41926	44056	2	3	29274	11415	46700	2	12029	3	67008	37138	34197	37358	12794	16050	23306	2	36178	3
12	686	5141667	45	45_ 686	228757	2	3	149750	312952	2	351096	8319	10489	3887	3	2	8271	3	2	3	2	2018	259288	5834	5946	3	284532	2	3	2	3	2	3	2	3	5979	2	299906	273648	3	2	3	2
13	717	5193333	45	45_ 717	1218679	956915	1131012	1559094	1333211	1077302	1728938	1566787	1852626	759470	416818	296469	814770	530528	827865	929515	1127725	605529	762971	1128062	665293	371657	372925	634578	455796	626792	337650	323921	1681633	981140	864898	345101	457468	318377	509937	257967	394998	855386	268630
14	730	5215000	45	45_ 730	3	2	3	2	3	2	15809	15214	22165	11245	763437	321867	16322	11365	267842	452595	434677	13173	3	2	270110	377687	11021	301949	3	299968	642195	9693	400119	2	3	681258	712514	10900	10657	321551	16656	390764	441270
15	807	5343333	45	45_ 807	28294	15707	31653	36943	39984	53101	56297	55933	64225	9777	16988	9533	19297	13924	18707	14857	13397	22897	7224	24688	26903	10409	14912	10532	16131	11341	12411	7531	31695	30888	32115	11162	29817	14450	17283	11364	29320	30726	15696
16	810	5348333	45	45_ 810	2	26573	3	2	3	3818	2	3	2494	2863	2	13747	3	2	3	27756	25705	2	11359	16338	11891	16738	3	15833	10679	22122	23015	2	3	2	17540	21762	14104	3	2	3	3017	12537	27970
17	882	5468333	45	45_ 882	63645	80383	72650	10784	11301	10756	238479	185153	123095	7993	15032	14161	98316	13647	28109	131675	90752	21140	19456	18170	15952	16339	14372	17374	13256	31166	19089	8629	87855	89737	18400	15146	23236	13441	14034	14358	17743	32373	16235
18	941	5566667	45	45_ 941	2	3	2	3	1979	2240	2	1370	3	1413	4475	2	3	2	3	2	3	3851	2	1301	3	2	3	2	3	2	870	522	3	2	1396	1072	1551	631	983	3	2	1547	674
19	980	5631667	45	45_ 980	386523	282938	368057	218293	98331	97711	1107323	1134688	1905529	92484	114927	68096	811387	91391	355726	794309	705813	106668	150372	229862	219786	68566	72063	92322	116858	215220	112311	53143	716294	465552	145699	120202	131189	55215	89043	90120	115818	240194	90429
20	1061	5766667	45	45_1061	176068	132675	157368	182787	193160	259074	157220	168354	201360	213205	180918	180325	176716	198804	162613	159341	178616	207555	161032	157601	149500	165677	201529	195738	220666	162663	154678	245258	206662	189902	213085	177947	159883	216024	211833	222144	185309	168807	153830
21	1110	5848333	45	45_1110	22113	28780	3	23156	36928	25116	27677	23261	21365	28778	32538	33638	19430	31361	22547	26655	27591	16805	27057	28367	25172	41491	32728	36723	14480	19666	35448	20571	34943	34473	23921	21628	27196	35002	29161	28721	26445	29345	24512
22	1173	5953333	45	45_1173	49479	30738	45834	42360	33976	74261	72101	77760	98929	52183	30722	22743	83865	52261	52564	50483	73706	74495	17136	83293	71237	29913	44654	32796	19673	48651	63077	30270	32601	36371	94693	63117	58934	40578	41064	43150	111964	68402	62251
23	1219	6030000	45	45_1219	132030	113202	135350	126562	95165	101745	186538	172906	203268	102442	99790	90554	185650	196826	257479	185543	217152	130461	165290	190676	311340	129924	106605	132120	93108	215538	170849	121074	101329	83068	155179	213775	183694	114735	98857	142847	128662	219187	189771
24	1249	6080000	45	45_1249	14888	2	3	2	13825	18331	3	17717	17207	10823	21940	15759	15011	2	27190	28309	3	2	11215	3	32836	17002	12247	14400	2	31701	33192	10880	25456	3	2	33979	40155	13789	15377	3	2	33276	30817
25	1281	6133333	45	45_1281	84812	59061	65653	38220	70982	119302	184953	175843	160361	79717	51176	37780	116887	119306	61236	78865	88144	105753	20463	103504	71073	47587	78260	55299	75991	62059	79450	82776	85555	72503	167347	64014	93218	68669	91731	53399	143432	84927	100080
26	1334	6221667	45	45_1334	530111	626030	637078	380278	500154	309566	441198	384391	387600	345408	445364	557279	506765	505590	695105	506307	458341	354996	454063	458827	654589	608986	445378	588184	473302	597547	463757	358930	591426	652439	553749	427983	584499	474814	536519	435645	353470	530411	664017
27	1362	6268333	45	45_1362	3	2	3	2	17080	3	2	3	2	25239	3	2	3	2	3	2	3	2	3	2	3	2	3	2	3	2	3	2	24279	3	2	3	2	3	2	3	2	3	2
28	1421	6366667	45	45_1421	204255	173548	163743	1013781	671581	442676	166348	123214	92697	491427	367091	327982	67202	5995	83159	62620	75157	14126	20597	49646	59262	9230	13794	10078	11854	83165	53801	3	667613	679378	40343	47591	51121	7258	17861	8712	45185	46486	44411
29	1459	6430000	45	45_1459	2	13136	18091	3	27036	20809	9149	6548	2	12602	20869	20439	3	2	3	2	15172	3	2	3	2	3	9765	2	3	2	3	2	29222	3	2	3	2	9610	4157	2587	8087	3	2
30	1526	6541667	45	45_1526	3	2	3	2	3	2	3	2	3	2	3	2	13864	3	2	3	2	8191	3	2	3	2	3	2	3	2	3	2	3	2	3	2	3	2	3	2	9968	3	2
31	1527	6543334	45	45_1527	11083	3	2	25741	9375	17543	39619	22812	21683	12734	3	7184	29090	19916	14449	18403	19399	28692	9240	7998	14361	2	3	8635	8765	19050	2	3	27917	29072	13152	13987	12793	2	7893	9901	34415	18534	3
32	1561	6600000	45	45_1561	12606	2	3	22552	14025	37013	19795	23119	32472	21252	14119	2	3	2	12005	14058	20893	3	3938	20767	2	3	14790	11132	19280	13739	15823	19222	12063	10183	27905	16870	16846	13383	14582	11659	2	17122	16890
33	1637	6726666	45	45_1637	95329	80085	95404	64489	24521	45856	3	2	3	48109	63309	26663	2	46835	76686	3	132251	57973	64666	59456	74809	57965	49543	59090	60962	85364	53059	46955	106897	96453	57474	71775	66251	18781	49395	69073	58658	66629	56383
34	1671	6783333	45	45_1671	346857	280536	352533	54652	56234	26730	1042867	1082949	1534202	37615	54953	58612	692310	58660	133472	729448	623019	61193	98697	91401	112545	35129	33129	53125	77526	169967	66534	40490	521522	423252	90446	78185	87346	49584	50161	60760	123715	193583	58678
35	1705	6840000	45	45_1705	2	3	2	3	2	3	2	3	2	3	2	3	2	3	2	12667	16807	27299	9480	8166	12217	3	20762	17808	2	3	46894	17251	2	3	91385	58790	80697	22633	2	3	2	69673	93969
36	1741	6900000	45	45_1741	75783	87852	179176	43711	97492	109299	129206	111853	46655	30492	154625	101697	84490	67831	112824	174660	173673	3	101261	78831	108140	132065	82247	97457	129306	34968	114825	32744	144812	142828	157302	154686	197599	96195	84698	88339	167577	169467	107453
37	1778	6961667	45	45_1778	63976	60243	59941	2206	4162	3146	2164	2941	18112	2	37437	2483	1110	40688	3804	7404	4171	53991	69041	4219	3	72522	61411	81341	57250	141618	152963	111942	55895	75217	142536	186503	251967	79229	99746	161732	190365	194120	267342
38	1816	7025000	45	45_1816	7746	10141	7323	2	3	2	3	2	21919	3	5318	2	20874	2575	3	20992	24023	2	3166	3	2	5456	4873	6107	8004	12216	3089	3	3585	6294	24272	12856	2	5797	20441	7847	25500	13589	3
39	1854	7088333	45	45_1854	21145	2	3	22239	23620	17946	19906	21375	23695	16208	20842	22548	22830	16160	26742	13858	15985	18281	23208	19479	23743	23009	19860	24534	28663	28485	17618	19563	199174	41616	24350	27312	29337	21689	10371	27062	24526	28121	28225
40	1897	7160000	45	45_1897	2	3	2	13714	3	6731	2	3	2	4583	3	2	3	3633	10859	2	3	2	4065	3	2	3	2	3	2	21396	10858	9253	3	2	3	27603	22527	2	3	11987	2	20340	18134
41	1935	7223333	45	45_1935	32281	45076	30894	39744	3	2	30288	31509	3	32449	20498	2	63347	23771	102849	58777	60234	17201	23676	60623	105352	3	21746	2	54129	139960	48851	33247	3	2	67874	126738	70585	3	24285	29720	37578	81080	62414
42	1966	7275000	45	45_1966	2	3	2	3	2	3	2	3	2	19295	3	2	3	14995	44556	2	3	27999	2	42977	48507	3	2	3	32627	84858	53090	2	3	2	3	64756	2	3	2	3	59930	2	25259
43	1993	7320000	45	45_1993	207757	159109	185699	154901	36550	38856	826036	827453	1232389	121928	64343	67283	459079	78824	234694	457678	435938	90537	126010	135104	309374	58830	52321	71675	86654	185064	127868	140623	307599	192695	87322	124475	115931	39390	61336	113722	80558	149542	91338
44	2011	7350000	45	45_2011	3	2	3	2	49778	53355	3	5020	2	3	2	3	2	3	2	484	1224	1785	3	907	2	3	517	460	2	3	1678	2	3	2	3606	2286	1047	3	2	3	2	1027	3
45	2064	7438334	45	45_2064	2	1688	3	15105	2	1799	3	2	3	2	3	2377	2	3	2	3	2	3	2	3	2	3	2	3	1399	2	3	2	3	2	3	2	3	2	3	597	2	3	2
46	2123	7536667	45	45_2123	3	2	3	2	3	2	3	2	3	2	3	2	3	2	167386	467894	3	66981	2	120841	153451	3	2	3	2	3	108023	2	3	2	3	128199	123588	2	3	2	41845	3	105661
47	2152	7585000	45	45_2152	953047	608428	750161	1455047	1250591	1362800	820279	789453	1135601	1427045	1021728	890797	447140	155933	432950	402389	489536	98206	224080	143397	225501	122354	192442	328728	220921	257433	193561	111559	1285998	1261115	497579	188321	308447	107169	201467	171579	399458	362409	178404
48	2201	7666667	45	45_2201	543686	493542	565628	309761	213036	2	1116719	1117352	1599361	171421	3	2	1020895	147544	476764	1036098	966056	142630	181962	180221	190714	166453	153883	179685	166045	185672	169831	142059	3	2	155956	168247	171455	147451	151730	173977	158181	169689	167845
49	2277	7793334	45	45_2277	175784	172049	187011	81831	47930	76711	193940	175698	222645	97764	83722	93558	226552	73979	309768	270917	242070	76385	101660	260857	311490	89847	77173	89321	3	364821	249501	82603	83663	102698	257744	329722	294387	65939	88208	99929	259865	301325	274690
50	2328	7878334	45	45_2328	65039	60622	2	3	69158	60933	105258	101562	105653	49218	2	3	85567	2	110544	95849	95226	35562	3	96676	92338	2	3	45143	2	102710	63895	18130	3	2	3	81992	2	44896	3	2	3	84785	62637
51	2366	7941667	45	45_2366	66344	7552	59491	66549	55225	47268	172268	168230	210467	59845	57562	56262	62002	43956	84757	8610	87023	60692	65059	62710	71518	54900	49903	63533	78245	80047	61694	60900	59666	58692	61471	62565	80425	50913	45061	76216	52469	73429	7188
52	2411	8016666	45	45_2411	2	3	2	3	2	3	2	3	2	3	2	3	2	3	2	3	2	3	2	3	2	10473	3	11985	2	3	2	3	2	3	2	3	13084	7398	2	3	2	3	2
53	2411	8016666	45	45_2411	5780	3	10183	7201	15145	9866	11309	6851	2	9322	14466	12315	1839	3590	10675	3	10453	2	6758	5669	7772	8255	7341	10774	5041	6143	5953	3	15567	15007	10500	6316	11443	9344	5760	4606	2	10341	9536
54	2492	8151667	45	45_2492	67505	60120	13322	96039	111714	70022	320636	298666	248861	46284	64919	14172	63785	17066	35574	38840	42403	20880	22596	21888	18152	3	11020	2	11182	22827	12648	7303	221333	89947	37457	13443	3	2	8817	9574	35017	15155	3
55	2523	8203333	45	45_2523	2	3	2	764	3	2535	2	3	2	1702	3	2	3	2	3	2	3	2	3	2	3	2	597	3	1040	2	3	2	3	2	1716	3	2	3	2	3	2	3	2
56	2553	8253333	45	45_2553	7571	5252	5970	3884	2606	3755	3	5612	9267	4306	1613	1983	5162	2662	12669	8760	8540	1067	930	12435	15051	2410	3115	2884	4388	18383	13117	4974	2576	3212	12620	14847	12107	2702	3686	2974	15110	10664	11777
57	2599	8330000	45	45_2599	120974	101672	112498	51820	42005	41660	174452	173396	254190	57626	45651	50410	209051	41933	232509	182663	175421	44805	58639	175073	228373	50258	43310	51146	64897	252595	165463	51265	60970	27280	138481	207288	177859	36193	53267	5391	141722	162675	164702
58	2639	8396667	45	45_2639	258388	145084	177349	38859	2	3	743789	746948	1204143	2	3	2	704124	3	67425	625166	554083	28147	2	34503	31400	3	2	3	2	44650	19544	3	222964	26268	2	3	85318	2	3	2	76421	32189	13074
59	2688	8478333	45	45_2688	3	2	3	2	21199	23718	3	2	3	37130	22944	22601	2	3	2	3	2	5268	3	2	3	2	3	2	27972	3	2	29916	3	2	22083	28943	3	2	3	22415	2	3	2
60	2760	8598333	45	45_2760	56232	48315	44215	70601	54494	32201	68928	58388	96323	50008	48399	53672	93009	27255	115659	75990	74172	22555	52357	74275	100783	7245	26541	42960	12288	115142	61533	31286	59509	63311	52737	88104	65226	29120	32174	9549	50418	66708	63604
61	2792	8651667	45	45_2792	3	2	1147	5320	3	2	941	3	2	3011	3	2	3	2	3	3564	2	1053	3	3867	2	3	2	3017	3	2	3	3732	2	3	2	3	2	3190	3	2	341	3	2
62	2840	8731667	45	45_2840	23158	17785	18410	24295	15424	3	28786	24892	42581	18486	16517	17490	72808	9300	80586	56966	54666	8094	18735	42528	54866	12483	12729	14701	14847	23206	14736	13920	16286	17378	12575	20129	15670	12074	14830	22596	11546	20565	16584
63	2872	8785000	45	45_2872	2	3	304	2	3	2	3	2	3	2	771	3	2	3	2	3	2	3	2	3	2	1800	728	1458	3	2	3	1863	2	3	2	3	2	3	227	2	3	2	3
64	2941	8900000	45	45_2941	21606	14170	16846	24969	20695	21153	21163	16107	18839	24265	14514	12382	21879	15376	29557	24054	21266	15304	3806	22911	27453	11573	16868	11179	14659	35824	22132	24002	16842	13361	22218	27301	26937	13313	21006	9332	20441	23531	23952
65	2972	8951667	45	45_2972	6767	2	3	6813	2	5179	3	2	3	5318	2	3	2	3	5873	2	3	2	3	6177	5315	2	3	2	6690	8233	5078	5779	3	2	6623	6440	7464	3	2	3	6919	7190	2
66	3009	9013333	45	45_3009	13383	7457	7747	10897	3	12716	28539	23391	38895	13497	2	3	39091	8435	14649	25558	20716	10342	10370	26110	17754	2	7688	3	12039	11250	8554	16537	2	3	10432	11388	9990	12030	8254	20410	10226	11316	10097
67	3073	9120000	45	45_3073	2	3	2	8939	3	6324	2	3	2	3	2	3	2	8064	3	2	3	2	3	2	3	2	3	2	4376	3	2	3	2	3	2	3	2	3	2	3	2	3	2
68	3092	9151667	45	45_3092	12362	7165	8263	5421	5703	4495	39784	33838	39402	3485	5905	8137	14947	8966	11638	17293	19065	16061	10948	5044	8467	5709	5302	7729	4379	8526	4385	6539	6939	10207	3672	4681	3769	5556	4718	7974	3	6297	5247
69	3123	9203333	45	45_3123	2	3	2	3	2	3	10551	2	3	2	3	2	3	2	3	2	3	2	3	7403	2	3	2	3	2	3	3095	2	3	2	3	2	3	2	3	3189	2	3	5739
70	3123	9203333	45	45_3123	6601	4607	7594	2	3	2	5428	7696	8124	3	6162	5340	7283	2	8475	8107	5156	15693	7417	5353	6757	5804	3	4889	2	11283	3	2901	2	7176	6316	9110	6209	2704	3	6158	6721	5859	2
71	3229	9380000	45	45_3229	27651	23079	21077	14530	9369	9781	26692	20905	39920	16326	12060	10819	34423	12371	39042	25742	19895	3	15786	30369	43038	12808	13714	13994	10537	50138	35432	14008	15734	13246	11790	44059	39998	9284	15743	2	15616	35135	39238
72	3269	9446667	45	45_3269	45417	41148	38538	37073	37238	13074	20641	19024	33837	51630	45172	39298	34665	41871	61689	29502	25044	41587	63259	50119	72287	50788	59090	50900	20123	83317	61804	55231	43164	15493	40930	76785	69079	38638	73751	10445	47639	60322	69440
73	3318	9528334	45	45_3318	19160	10357	9486	18722	11753	44941	73160	74770	147763	19548	6164	8783	38884	10821	15459	20980	17285	11219	11142	12067	15807	6086	8525	9393	12612	24137	8805	8299	12313	9152	10922	12911	9787	7387	10399	9295	9476	13411	14558
74	3364	9605000	45	45_3364	139492	105632	104806	238510	135680	178956	253372	202730	347390	259070	154193	169050	325241	35805	334638	229133	234514	18733	77208	192801	285095	19477	37756	31660	120478	234047	38600	45004	98918	99228	60024	150466	44398	20273	33217	56443	33465	138981	37342
75	3413	9686666	45	45_3413	3	2	3	21756	14384	22394	2	3	57027	22682	14502	15318	57604	2	60283	34221	40941	16230	13346	3	70863	2	3	11059	22677	64228	2	3889	15280	11852	3	2	3	2	3	34346	2	37231	3
76	3527	9876667	45	45_3527	2	10572	3	2	3	2	13215	8928	12049	3	2	3	2	3	2	3	2	3	2	3	2	3	2	3	2	3	2	3	2	3	2	3	2	3	2	3	2	3	16134
77	3587	9976666	45	45_3587	31290	5757	25315	16026	14813	14200	6707	5550	6917	21086	16569	18637	19325	22406	17354	15431	11444	18975	9080	8850	19496	5443	7209	6572	28482	24913	15858	8492	17280	16567	18900	20518	17567	21787	29198	8826	83691	15353	18356
78	3627	10043333	45	45_3627	13999	2	3	71478	15624	21785	4545	3921	2	18129	10258	9385	5750	3	2	4736	3	2	3	2	3	2	3	2	3	2	3	2	13515	15943	3	2	3	2	3	2	3	2	3
79	3679	10130000	45	45_3679	1764	2	3	2	3	2	919	348	3	2	3	2	3	2	2204	3	2	3	2	3	2018	2	3	2	3	3514	2	3	2	679	1993	2808	1924	3	2	3	2	2020	2000
80	3720	10198334	45	45_3720	25594	17536	26929	11060	11640	14238	18180	15327	24905	10720	15588	15722	29617	12164	32411	18545	11895	36569	14943	24271	30582	11681	13731	11450	20664	43129	23101	10082	15730	16708	25129	32532	25205	12007	19977	17620	23801	26635	29282
81	3772	10285000	45	45_3772	24473	15265	15593	14823	9933	23530	34178	31359	80862	8470	9961	13055	150536	2120	170021	90106	101301	2214	11780	102712	140640	1203	5794	3729	1760	8492	3807	1688	2690	10147	6550	19692	78620	4085	3889	13342	5965	72084	4129
82	3812	10351666	45	45_3812	3	2	3	2	3	2	47595	51773	85748	3	2	3	2	3	2	3	2	3	2	3	2	3	2	3	2	3	2	3	2	17728	3	2	9979	3	2	19216	3	6547	2
83	3848	10411667	45	45_3848	76061	39057	42271	63963	52903	57390	405073	391874	681922	108516	36462	52850	150773	4810	101654	105395	87087	52606	26766	79844	105663	15058	17877	19016	36421	119801	78774	23322	87314	89200	66358	99667	3	14303	23300	2	72065	3	80903
84	3877	10460000	45	45_3877	2	3	8511	2	3	7354	15566	2	3	2	6181	3	2	3	2	11199	5299	7201	3	2	3	2	3	3715	2	3	2	6024	7485	7990	3	2	3	4076	6476	2	3	2	15813
85	3930	10548333	45	45_3930	33071	16505	17777	14985	13635	15263	34218	30722	50190	20985	9824	11976	43310	17951	36416	29940	23212	11695	13655	35316	35111	8988	19835	13141	10830	28873	29681	24311	16507	14734	20603	22201	26878	14808	25460	21679	19172	16284	21992
86	3978	10628333	45	45_3978	35933	24664	25499	31480	20085	26442	25472	21465	42452	31785	13334	20013	39021	17715	49797	3	17200	20691	2	40412	43051	3	16108	2	12479	47597	30559	25192	18685	18643	25373	36203	26661	3	2	19048	25864	27205	29782
87	4027	10710000	45	45_4027	26673	3	21534	2	3	2	3	2	3	26726	17440	19522	2	17281	43379	20987	3	17341	23791	34439	38603	16190	18350	18641	9105	45605	27967	2	3	2	23332	35811	27853	13434	22092	2187	25813	25761	26396
88	4100	10831667	45	45_4100	125020	107579	111218	57796	57490	58815	43901	41129	56103	73761	68181	62430	72427	66204	106807	55711	39916	58005	84145	96880	96049	59207	66269	64626	43905	119839	85490	59303	91137	68892	183606	89867	71763	33385	58848	42584	69825	52019	63580
89	4150	10915000	45	45_4150	7396	5850	5497	2383	2219	3150	3	2	3	5070	1570	3996	2	4032	9894	2906	3	4438	4635	8633	7974	3409	3342	3726	1846	2	8723	3757	1696	3731	8777	3	2	2020	3534	4251	8838	8142	7478
90	4186	10975000	45	45_4186	12235	9949	29349	13160	23429	22644	15118	12690	19908	13827	24310	20734	22650	19641	36338	17195	9716	15981	26112	24768	35057	23986	21393	20964	22782	42750	18724	11907	21526	24508	19387	34161	27326	20799	23105	16155	21273	25510	27897
91	4252	11085000	45	45_4252	3	2	3	2	3	2	3	2	3	2	3	2	2608	2265	3	2	3	2	3	5237	2	1746	3	2	3	2	3	1189	2	3	2	6669	3	2	3	2	3	2	3
92	4287	11143333	45	45_4287	12021	8976	7916	11082	5331	6472	9417	8032	30088	4581	1839	2674	25892	4752	19539	10519	2	4484	3057	16781	19756	4552	1422	1435	3389	24290	15684	5220	5656	7649	5283	19986	15625	3	5857	5634	4038	13820	16295
93	4326	11208333	45	45_4326	2	3	2	3	2	3	2	3	24965	2	3	2	22912	3	2	3	2	3	2	3	2	3	2	3	2	3	2	3	2	3	3994	2	3	2	3	2	6185	3	2
94	4374	11288333	45	45_4374	3316	2322	2246	3967	2778	3271	5019	4505	6709	3	2268	2499	5895	3017	6852	5033	2	2975	4464	6006	7199	3	3053	2573	3818	8850	5058	6919	2244	1780	4462	8342	5237	3879	3864	5283	5832	5763	7478
95	4417	11360000	45	45_4417	2	3	2	3	2	3	2	3	2	3	2	3	2	1696	6840	3	2	3355	2349	6240	4707	3	1896	1958	1435	7357	3431	4639	2	3	3402	4766	2736	2	2455	3	2	3191	3036
96	4455	11423333	45	45_4455	37714	32945	2895	22683	17811	17511	26703	24092	38898	17578	12259	12752	50112	14371	90314	37848	3	17387	19057	68752	95740	14771	16276	16359	24102	120077	75287	20968	17774	16421	75072	104583	77040	12214	21047	23506	85569	78897	86652
97	4511	11516666	45	45_4511	2	3	2	5902	3	4734	2	3	2	3	2	3	2	5592	20131	6258	3	2	6507	15251	21234	5398	5961	5024	6868	34616	19089	8529	9160	5905	20767	29932	19324	4451	7458	7481	24476	22897	22929
98	4541	11566667	45	45_4541	59483	44822	45273	32559	21497	25668	3	2	36564	60257	39369	40560	36185	49496	65319	20143	6322	56492	68514	47105	71876	48749	55384	50090	20805	98466	60422	73754	35290	37194	53344	74950	58344	38290	66295	62025	55560	61583	65175
99	4586	11641666	45	45_4586	5201	3888	4151	22472	17627	17832	3	7107	11397	6577	4073	3973	2	2470	4984	3	2	2923	1890	5041	5538	1846	1829	1920	3	7459	3319	3192	11015	10360	2027	3569	2774	2266	2664	3422	2507	2563	2811
100	4623	11703333	45	45_4623	8580	7729	6485	6620	12974	9715	8829	8461	5651	7938	7139	9976	8279	9186	14677	7521	2	4926	9395	11678	17767	9815	9366	9939	9203	23450	15199	6264	8418	8936	12949	19262	12808	9946	7762	9962	14713	14538	16730
101	4675	11790000	45	45_4675	33980	26442	25212	21683	10757	13237	60397	51693	80699	31477	19625	19059	51507	22530	79325	37443	3	29016	32108	61811	73977	23942	26374	24841	20550	84452	46305	36718	20605	21393	41632	62325	44347	20032	32725	31925	46242	49185	50879
102	4714	11855000	45	45_4714	3287	2622	2355	2	3	2	24190	2080	3	2	3	2	2308	679	11859	1902	3	2	444	8745	7533	703	711	649	2065	14731	6099	3603	3	1528	7093	11094	5875	1803	1423	3364	9140	7753	7492
103	4751	11916667	45	45_4751	18650	15289	16001	10008	7490	8276	23129	20337	28306	11612	7683	9239	27657	8055	29477	21804	2	9759	9300	24843	30532	8059	8391	11497	12114	38736	21468	12208	8999	12146	22686	29242	22724	9493	11233	18333	23966	22281	24177
104	4790	11981667	45	45_4790	2272	1813	1838	3918	2827	3501	7690	7067	8818	1317	3	2	7537	1029	3	7109	2	3	805	2	3	710	713	2	3	2	3768	3	4026	2302	2	3	2	735	3	2	4358	3	2
105	4820	12031667	45	45_4820	6543	3655	4616	3	2909	23134	2116	2	8576	3	2	3	5536	2	9702	1278	3	2	3	2	3	2	3	2	3684	3	3679	2	3	2	5251	6896	5114	3	2	507	5909	4444	5996
106	4863	12103333	45	45_4863	149053	126000	138018	66720	3	2	181518	59663	96617	7603	38552	44256	109053	38433	134678	94602	93803	45859	57956	95017	73821	35127	34842	26110	25540	86435	57575	70438	5473	3	57424	75320	56572	31252	47001	16956	62644	55877	61572
107	4950	12248333	45	45_4950	198934	176773	177658	221478	158571	188468	90619	81331	2	20413	4908	11289	3	12087	127130	135119	129753	12982	15271	132535	96790	11762	11524	11578	27810	111847	79451	17631	52212	45633	76004	101586	78395	9440	13330	2	85566	73404	89780
108	4976	12291667	45	45_4976	3	2	3	2	3	2	3	2	3	7324	2	3	2	3883	3	2	3	2	5216	3	14345	3806	3291	3730	2	3	10437	7600	2	3	11125	16824	2	2923	3	2	12236	9093	13239
109	5023	12370000	45	45_5023	3	2	3	205355	153593	2	3	2	3	2	3	2	3	2	3	2	3	2	3	2	37808	3	2	3	8734	48409	2	3	2	55838	3	14185	2	3	2	3	2	3	2
110	5038	12395000	45	45_5038	456336	426833	427797	552151	453713	555811	459272	465061	521782	38136	15516	15886	487989	40824	456215	469249	444571	10737	13795	472129	3	10774	9713	7601	2	3	69275	11765	53490	429960	28732	20146	41310	6178	9286	53112	40945	48293	58894
111	5071	12450000	45	45_5071	521682	531431	517825	2	3	2	3	2	3	23770	20047	12135	2	8718	3	2	3	7325	22829	133752	2	4800	7571	11719	3	62236	6544	6416	2	3	9528	2	17476	4424	12722	31242	8448	3	9445
112	5150	12581667	45	45_5150	563345	551193	544545	540669	527919	534293	647220	662289	687954	36692	12139	21296	652786	30512	647472	710410	657793	16685	16895	496867	100611	9198	9881	10599	29944	35250	19431	7248	477542	549449	7539	16205	13611	5618	7986	24087	11921	39145	16045
113	5112	12518333	45	45_5112	134416	110374	132247	2	3	2	468181	489567	3	2	3	2	3	2	3	2	410506	3	2	3	36849	2	3	2	12124	3	2	3	45197	2	3	2	3	2	3	2	3	14535	2
114	5191	12650000	45	45_5191	63797	54881	49410	572295	519158	571718	640206	652391	672348	15300	7299	3125	624978	4408	46290	677774	642293	6347	9201	31393	13536	2496	2396	5809	12685	25458	5121	4756	504024	33487	8840	8257	8461	2259	5395	16519	8259	17506	6162
115	5217	12693334	45	45_5217	3	23486	2	108133	3	2	3	238288	2	661	3	502	2	1173	3	2	206295	201809	569	3	1304	2	3	810	799	2	1956	3	2	10088	3	2	2196	1453	772	1558	3	2603	2663
116	5298	12828333	45	45_5298	11880	18953	11760	18387	13589	22454	96635	102462	150459	5368	2929	3476	110149	3424	19208	130190	80066	3969	4188	17891	16288	2817	2491	3071	3930	16402	10017	3678	11017	3728	6215	8953	6501	2099	2	1924	5781	5683	6536
117	5355	12923333	45	45_5355	10793	16634	9602	21855	14145	31011	66223	3	2	7605	4251	4952	3	4774	7247	83732	51273	5660	5404	6083	5664	2998	3188	1671	2705	8654	4354	5244	14728	7498	902	6056	3500	2927	3637	2	1261	3816	4031
118	5408	13011666	45	45_5408	885	3	805	3180	2357	16212	2	3	2	648	3	2	3	2	1039	71713	43019	3	875	1192	1456	2	453	3	805	2687	1421	2107	2	8445	3	1398	964	474	319	611	2	925	904
119	5447	13076667	45	45_5447	7684	11297	10263	7342	8325	9676	53354	51555	81849	6879	6818	5496	39686	5648	8971	71689	42146	4670	6175	7129	7411	6589	5404	5710	7241	9530	7096	7067	11612	7012	7864	8876	8176	6017	5322	7601	8476	7995	6297
120	5487	13143333	45	45_5487	3	2	3	2230	367	2	3	2	3	1279	2712	2	3	2	3	2	3	2	3	2	3	2	3	759	2	3	2	1521	5124	3	2	3	2	3	875	2	3	2	3
121	5526	13208333	45	45_5526	36816	33104	32478	49495	39373	47719	73097	65833	93673	37581	32624	29768	47990	27471	49677	89511	65883	63744	29444	37869	3719	26250	27839	28108	41248	47041	31323	33700	41056	38344	37948	37229	37324	24899	24920	35791	33884	35556	33491
122	5562	13268333	45	45_5562	2	6720	348	56729	37120	50922	3	2	3	2	3	2	3	2	894	3	2	3	2	3	2	3	2	596	3	2	3	2	19250	9669	3	2	3	2	617	3	2	3	2
123	5603	13336667	45	45_5603	879	3	2	894	3	2	3	2	3	2	3	2	3	2	3	2	3	3634	921	525	508	535	356	595	2	2189	747	3	2	744	3	866	563	2	3	2	3	421	403
124	5645	13406667	45	45_5645	2	3	4513	2985	2296	3594	24143	24613	49070	2865	1873	1633	11236	1649	8106	51668	2	2109	2053	6710	6710	1480	1607	1508	1395	7743	5446	1361	2996	2019	3801	4890	3796	489	1222	855	2982	2630	3029
125	5685	13473333	45	45_5685	11534	9512	9570	13025	10869	12484	93834	91391	132360	3	6531	8246	93727	8700	60146	125522	88025	10104	10184	49742	5965	6841	6606	2469	15050	69652	1603	8801	8800	4907	43949	57644	1005	4614	4752	2	50296	41882	2054
126	5716	13525000	45	45_5716	18969	15611	15882	3	2	3	2	3	2	1569	3	2	3	2	3	2	42033	3	2	3	1013	2	3	726	2	3	1379	2	3	2	3	2	3	2	3	1842	2	3	2060
127	5775	13623333	45	45_5775	3002	1351	1325	2	3	2	3	2	3	9688	4218	6219	4735	8514	2	32389	3	9326	12368	2	2025	4262	5717	4886	1908	6691	3053	2736	1931	3	1945	875	835	1077	2	1226	3	1468	2
128	5821	13700000	45	45_5821	26687	16600	16886	32488	8408	15279	16402	12060	51014	35023	6048	9977	45454	19129	55564	59961	44224	17964	31307	36683	41921	7788	9987	10122	17430	42283	26230	30818	23411	26060	17225	22309	11215	6008	7799	23122	14320	12548	13132
129	5904	13838333	45	45_5904	1422	1174	1387	1380	3	2	1703	2675	6828	421	713	799	2944	3	2683	22551	2	3	1467	1986	2481	2	339	3	671	2824	438	2	3	2	1589	1971	1224	3	2	685	1275	893	1335
130	5902	13835000	45	45_5902	3	2	3	2	617	1663	3	2	3	2	3	2	3	2	532	20925	3	4755	2	3	483	2	3	478	2	3	2	3	532	628	2	3	2	3	439	2	3	2	3
131	5944	13905000	45	45_5944	1397	1702	1618	2	3	728	2	1628	3	2	3	2	3	2	2846	16857	3	2	764	2122	2613	3	2	3	772	3880	3052	2	388	620	3018	3592	2862	3	309	2	3174	2562	2959
132	5989	13980000	45	45_5989	7013	5919	8117	3752	4154	3720	3	3218	2	3507	2787	2487	3	2922	4003	2	3	1094	2892	3586	4132	2817	2475	2636	4153	5798	5086	3889	4891	2	4097	3755	4152	2797	2244	3733	3588	3174	3058
133	6032	14051666	45	45_6032	3	2	3	592	314	2	12780	3	2864	509	2	3	2969	2	3	36366	29998	2	3	2	894	3	2	3	2	3	1194	884	413	6439	2	3	2	3	2	3	2	904	3
134	6094	14155000	45	45_6094	2144	1594	1806	1706	1009	1855	1177	1344	2394	1085	579	552	3119	2	3225	10658	12187	1081	975	3075	2897	767	715	723	999	3161	2308	794	1090	982	2599	2773	1860	706	700	961	2281	1821	2310
135	6152	14251667	45	45_6152	24188	18086	18753	26204	14709	19717	3	2	3	25849	10416	15184	30124	19411	11337	23292	29880	26602	21415	21210	6866	12673	15944	14741	24311	8046	16307	26342	16056	16227	4214	22170	12101	15683	16321	22886	18904	14722	11024
136	6191	14316667	45	45_6191	19900	13300	11291	30158	12935	24628	17733	18037	30256	22420	7724	10765	28115	12150	28478	20068	30288	19207	18559	7943	21917	16520	13025	11829	7101	25273	4874	25235	11364	15743	15965	7989	2262	12197	11375	22192	3964	3300	29103
137	6237	14393333	45	45_6237	11936	2	518	20254	10783	12970	19509	17456	56365	14757	9781	9351	1661	8633	13371	3143	7018	20992	9141	9669	9987	8357	9074	9016	13304	12279	8148	771	10934	10602	10053	9762	10260	7881	8444	12704	9119	9230	9112
138	6295	14490000	45	45_6295	3	2	3	2091	1138	502	1184	496	4305	1508	2	3	2	1740	3	2	3	2010	641	443	2	3	2	501	3	2	3	1114	2	552	3	490	2	544	3	752	226	2	563
139	6354	14588333	45	45_6354	872	875	1025	3	2	3	2	836	3	2	462	662	800	3	2	3	4534	2	3	2	3	2	576	3	2	3	2	3	777	614	1226	552	2	610	570	3	716	564	2
140	6400	14665000	45	45_6400	1211	3	2	7430	3952	2560	3108	2307	8417	5969	710	2493	4694	4646	3586	3	2	2163	2412	1823	3129	618	2256	1740	2129	2663	1687	4214	1103	594	3	1268	810	1182	2411	2913	1041	825	4111
141	6490	14815000	45	45_6490	1703	543	1734	2835	1980	1324	8270	1404	1927	2013	1385	1120	840	1500	1764	1382	1970	417	1290	1674	1542	1187	1003	1157	1672	2429	1120	2166	1558	1806	1520	1605	1631	1518	804	2110	1911	1504	1915
142	6489	14813334	45	45_6489	2	3	2	3	2	3	2400	708	2955	397	2	3	2	3	2	3	2098	523	2	3	2	3	608	2	3	2	547	1749	244	3	2	3	2	3	2	3	2	3	2
143	6530	14881667	45	45_6530	1164	3	2	3	2	1117	3	2	3	2	3	931	2	3	2	3	2	2143	904	3	2	3	2	685	3	2	3	2	524	359	3	2	3	2	611	3	2	3	1005
144	6572	14951667	45	45_6572	998	1086	1182	2357	1603	1393	1849	1907	3960	2165	1686	967	1393	776	2	1948	2646	4203	763	1137	786	1396	1087	1018	3	643	1619	1599	1591	1974	1312	2	1895	974	1087	599	883	1379	1352
145	6587	14976666	45	45_6587	3	2	3	2752	2	3	2	3	2	1895	3	339	2	3	2	3	2	3	579	2	3	2	3	2	3	2	3	2	3	2	3	2	3	2	3	2	3	2	3
146	6633	15053333	45	45_6633	677	2	3	1692	370	825	7357	5711	8719	1240	2	3	2647	2	1104	3778	2754	3	441	755	521	2	326	282	3	789	364	2	365	3	2	594	507	3	2	3	977	567	252
147	6708	15178333	45	45_6708	1043	749	2	4905	1488	1253	3	388	1831	4194	519	1483	1378	2074	1110	2	3	1375	1279	2	899	3	1168	721	744	1254	496	2913	597	578	2	949	3	1041	1137	1855	949	2	1568
148	6787	15310000	45	45_6787	2074	1274	1607	2737	1332	1446	1066	454	2479	2235	699	1086	2820	1878	2495	1271	1341	2341	1961	1738	1814	724	1399	1288	1934	1559	999	1655	1056	1260	1034	1832	664	931	974	1655	1581	1174	2082
149	6836	15391666	45	45_6836	751	3	852	7032	550	1633	1842	1128	6857	3667	2	3	3833	746	1838	2	1699	1646	811	584	514	3	2	365	1009	1551	415	3470	434	3	2	521	731	3	598	1604	842	581	1661
150	6870	15448334	45	45_6870	2	3	373	2	3	2	1715	1300	2969	3	2	3	2	3	771	528	603	615	2	3	2	3	269	2	3	696	2	3	470	491	2	449	438	3	2	3	2	520	816
151	6939	15563334	45	45_6939	11001	8462	10458	1739	1424	1114	2501	2185	4053	1537	911	575	5410	1235	7353	4551	6206	676	987	5451	6049	905	520	798	1936	8187	5510	1849	831	1278	6969	7055	6373	824	603	1363	6859	5457	7451
152	7005	15673333	45	45_7005	5198	3238	3613	8451	3416	5364	3399	4102	7615	5382	1889	2841	6840	3543	6021	2770	5122	5447	4232	4636	4128	2687	2423	2343	4699	5754	2821	7297	3160	2840	3100	4041	2388	2975	2895	5673	3746	2830	6401
153	7066	15775000	45	45_7066	3	2	3	2	3	2	3	2	3	339	2	3	2	3	711	2	3	2	3	500	421	2	3	2	3	593	269	2	3	2	3	470	2	3	2	3	446	2	529
154	7113	15853333	45	45_7113	620	775	700	885	281	3	1239	679	1856	616	2	3	1553	2	2338	894	1917	3	2	2321	2324	3	2	3	2	3712	1835	671	413	3	2489	2801	1902	2	411	3	2669	2250	2363
155	7177	15960000	45	45_7177	2	3	2	3	2	3	2	3	399	440	2	3	2	3	792	505	2	2443	3	806	865	2	3	2	3	1204	695	2	3	2	3	838	452	2	3	2	812	486	710
156	7211	16016666	45	45_7211	3	2	3	2	526	3	2	3	2	318	3	2	3	2	3	2	3	2083	2	3	399	2	3	2	3	434	224	2	3	2	3	2	3	2	3	314	210	2	3
157	7268	16111666	45	45_7268	29406	23079	29283	10333	6015	8989	59995	46331	63232	9311	4474	5867	76664	6684	86681	69113	83734	10008	7366	67324	60704	5747	5749	6708	20220	86626	54599	11230	5866	7021	67863	70413	58976	5788	7329	9663	73317	56381	61303
158	7342	16235001	45	45_7342	10583	2	2509	3	2	3	2	3	2	3	1204	2	3	2	7220	3	2	5676	1983	3	2	1892	3	2	6667	3	3253	2	3	2008	2	3	2	3	2285	2	3	2	3
159	7372	16285000	45	45_7372	5949	8017	10280	8604	2538	4339	16020	13791	20935	5671	1012	2181	26108	3047	36840	23241	28868	49517	3774	26722	25829	1280	1726	1775	4197	39732	22970	6536	2236	1962	29153	31140	25173	2251	2131	5446	32266	21669	6295
160	7519	16530001	45	45_7519	976	682	1240	2	3	631	3261	2600	2701	2	3	2	2080	3	2285	1982	2002	2	3	1496	677	2	3	2	3	914	463	2	3	2	3	2	3	2	3	2	459	3	621
161	7590	16648333	45	45_7590	972	643	686	549	334	2	626	664	869	306	3	2	693	3	1939	613	698	421	2	1678	3001	3	2	3	855	3805	1238	2	394	3	947	2254	563	2	3	2	1448	896	537
162	7625	16706667	45	45_7625	3	2	391	3	2	3	2	527	606	3	2	3	2	3	860	2	3	512	2	590	3	2	3	2	3	452	2	3	2	3	2	3	2	3	2	3	322	257	2
163	7655	16756666	45	45_7655	3	2	3	2	3	2	3	377	432	2	3	2	3	2	635	3	2	3	2	3	2	3	2	3	2	3	144	2	3	2	3	2	3	2	3	2	3	2	3
164	7798	16995001	45	45_7798	508	2	744	831	3	2	1010	659	1341	553	3	2	1049	3	936	1146	1749	772	2	622	726	3	2	3	2	817	526	871	432	413	3	880	733	2	3	2	776	498	547
165	7851	17083334	45	45_7851	3	2	3	2	3	2	3	605	482	256	2	3	2	3	2	3	2	3	2	3	409	2	3	2	3	771	210	2	3	2	3	588	603	2	3	2	584	3	378
166	7892	17151667	45	45_7892	2	3	2	3	2	3	579	2	3	2	3	2	3	2	801	3	731	1973	2	3	2	3	2	3	2	3	2	3	2	3	2	3	2	3	2	3	2	403	3
167	7937	17226667	45	45_7937	2838	1058	1023	5805	1189	2500	1424	1138	5444	3624	740	1053	4309	1220	2072	1362	2072	3945	1984	1885	1702	539	880	454	2280	2785	909	4830	1611	1269	1269	1862	682	823	827	2792	1584	740	2186
168	7977	17293333	45	45_7977	43008	31075	47005	54727	28395	44463	176320	159347	239769	16462	8607	4426	177603	2	105040	157624	186741	2385	3	50218	1753	2	3	2	2256	4590	332	3	33976	2492	3167	1202	713	2	695	1213	2570	2067	3
169	8043	17403334	45	45_8043	1383	2	3	2	1254	3	2	3	2	566	467	3	2	3	2	3	2	3	2	3	2	3	2	3	2	3	2	3	1921	2	3	2	3	2	3	2	3	2	3
170	8147	17576666	45	45_8147	684	524	704	1049	394	679	5385	2419	3785	1080	525	587	3439	2	849	2864	3632	1204	872	1427	576	3	465	2	3	803	480	1096	295	2	3	585	701	2	465	3	755	591	586
171	8203	17670000	45	45_8203	859	588	887	697	2	3	1698	1424	2576	654	2	3	2384	2	2574	2172	2386	546	368	1605	1278	3	2	287	3	2318	1116	1026	286	2	1769	1818	1460	3	341	2	2075	1308	1300
172	8271	17783333	45	45_8271	3	2	340	3	2	3	2	3	2	3	2	3	2	3	2	3	2	3	2	3	321	2	3	2	3	2	3	2	3	2	3	371	603	2	3	2	427	340	364
173	8412	18018333	45	45_8412	3	2	603	1516	671	1213	3	885	961	1134	2	421	990	3	795	927	1103	7509	450	2	359	3	355	2	3	806	431	1373	562	482	2	623	739	3	2	3	890	563	639
174	8558	18261667	45	45_8558	2	644	494	3	2	3	2	3	2	1542	914	922	3	2377	2	3	2	4334	2626	3	2	3013	2328	2683	3	2	145	6340	1008	1147	3	2	3	2808	2423	3110	2	3	2
175	8589	18313334	45	45_8589	3	2	3	2	3	2	3	2	3	2	3	2	3	2	3	2	3	2	3	2	3	2	3	2	3	2	130	1411	304	3	2	3	2	3	783	2	3	2	3
176	8649	18413334	45	45_8649	788	690	1049	2	420	3	2	3	489	1320	645	792	2	1995	3	2	3	3512	2246	2	565	2741	2263	2580	3	727	244	6126	1425	1454	1148	664	2	3072	4016	3296	1837	812	639
177	8870	18781666	45	45_8870	3	2	435	3	2	3	2	3	2	3	2	3	2	3	2	545	3	508	343	2	373	3	2	3	2	3	385	2	3	2	3	524	508	2	3	2	767	419	558
178	29	4046667	46	46_ 29	96095	95977	86781	79499	87393	87531	96816	89775	3	95347	95701	93239	89830	91675	94740	82929	99571	92160	1515	89944	91243	88475	85631	87395	100298	99968	88716	2	100253	97973	93112	92668	99818	85086	95284	89656	99466	89707	97778
179	92	4151667	46	46_ 92	3175	3	162	1201	2	3	17508	15940	28653	2	3	2	8609	3	5489	9716	7489	2	3	1319	2166	2	3	2	3	2395	2	3	4787	2	3	2	3	2	3	2	3	2	3
180	136	4225000	46	46_ 136	22972	20831	32223	9045	12348	12111	19916	14863	15481	13729	24715	17771	16682	21895	18015	22527	23733	27310	29585	16954	28260	33483	30619	33696	21214	44828	61148	38187	24090	32817	48140	57611	66964	33103	35997	42239	54486	56339	65185
181	196	4325000	46	46_ 196	1164	1238	1935	523	435	2	2767	2543	3552	480	656	465	3086	3	3394	3207	3383	506	523	2888	3781	795	2	250	753	3366	2743	3	677	4352	2141	2423	2638	457	564	654	1517	1698	1617
182	271	4450000	46	46_ 271	7555	7569	12530	13083	15502	11961	11063	16092	14354	11027	14054	10412	12166	9035	12850	14534	25640	11788	10827	11918	17163	12988	11155	11043	8796	14305	13988	11578	13926	15388	14081	13625	15483	10639	14862	11985	14411	12293	14144
183	314	4521667	46	46_ 314	1878	2101	3006	2973	3577	4108	5118	2789	2346	2107	4909	3672	1029	2531	3039	5745	5931	2397	2614	2331	2275	3152	3202	2723	3916	3363	2619	1352	4503	4182	4657	4140	6205	2928	3408	2470	4188	5277	3915
184	360	4598333	46	46_ 360	1147	1365	1334	2352	2442	2209	1880	1637	2333	365	2	381	966	3	2737	1435	1242	2	3	2079	1227	2	3	187	2	578	3	2	1201	1779	3	2	3	419	288	344	2	231	214
185	422	4701667	46	46_ 422	2768	3385	5311	1932	4552	3831	5245	5820	4225	4187	5233	4336	5054	4775	4014	5388	5683	5718	3404	4502	3870	4439	4514	4313	2294	4128	5011	3038	4802	4033	4280	3868	4958	4159	4266	4591	7112	4332	4775
186	466	4775000	46	46_ 466	3	2	505	3	2	3	2	3	2	3	2	344	601	3	2	539	3	2	3	2	420	3	2	749	3	817	2	3	2	314	3	2	3	651	210	658	2	666	727
187	555	4923333	46	46_ 555	6416	5950	7748	3670	1403	4006	2065	2098	3014	1910	2994	2528	1760	1130	4186	2107	3	2178	1864	3735	5187	2	1021	1008	1316	4157	4019	1240	4057	47660	2801	1549	1827	3	2	1003	3755	2666	2219
188	604	5005000	46	46_ 604	2815	2519	3100	1528	3	1150	2705	2479	2201	1731	1460	1112	2299	2	3033	2552	1949	1408	1139	2589	2947	842	3	1760	2	3166	3	821	2	4438	2382	2367	3	888	855	1550	2	2343	2418
189	654	5088333	46	46_ 654	349	3	2	3	789	2	1000	463	577	3	2	210	3	2	3	2	3	2	3	202	149	2	3	837	2	3	2	3	2	3	414	2	457	3	2	3	2	3	2
190	717	5193333	46	46_ 717	85899	66763	79220	108621	93322	74304	121326	108820	128152	51536	52154	18057	55432	35704	59226	63840	78123	41131	51809	77518	46037	22803	24880	42832	17514	44752	43434	21752	118400	67802	23844	46044	27890	21531	33856	15785	23634	57827	16145
191	686	5141667	46	46_ 686	13907	3	2	9145	19247	3	21384	1159	1644	2	25581	21714	3	2	16251	27947	26773	3	15479	14601	15879	25849	17299	18300	2	17753	20049	3	24542	2	3	20494	48809	18056	16622	21684	2	23408	30693
192	758	5261667	46	46_ 758	839	3	2	3	2	870	1093	3	2	3	2	216	3	699	2	3	2	867	3	2	3	2	3	2	677	3	2	3	2	3	1645	1015	1372	727	284	2	1241	3	1578
193	807	5343333	46	46_ 807	1648	872	1847	1303	2440	3169	3606	3576	4023	524	606	518	976	945	1086	1156	1059	1322	853	1227	1152	839	812	575	848	1129	1482	385	2010	1940	2436	1152	1790	701	835	531	1873	1039	1809
194	812	5351666	46	46_ 812	2	1390	3	2	3	2	3	2	3	2	1082	3	2	3	1441	1696	1598	2	3	456	2	1029	3	812	2	1395	3	2	3	2	3	2	3	2	3	328	2	1768	3
195	882	5468333	46	46_ 882	5627	6734	6401	1468	2247	1617	20835	16731	10567	1218	2647	2683	8865	2435	2975	11749	8246	2119	2983	3343	3008	3195	3065	3335	2518	3457	3978	1519	7642	7562	3364	3016	4565	2585	2709	2950	2652	3698	3453
196	980	5631667	46	46_ 980	30496	22153	29291	16575	7227	7131	90546	92459	155486	6781	8433	4952	64777	6929	28057	62859	56092	7477	11797	17539	17092	4925	5038	6816	8834	16571	8562	3421	56576	36830	11080	8761	9901	3866	6762	6533	8676	18620	6655
197	1060	5765000	46	46_1060	12245	9180	10951	12592	13186	17864	10801	11907	13676	14701	12423	12583	12158	13536	11303	10996	12399	14537	11247	10684	10310	11542	14045	13270	15316	11126	10692	17288	14391	13015	14795	12283	11011	15097	14969	15213	12801	11637	10737
198	1110	5848333	46	46_1110	1163	1873	1910	1106	1870	1376	1539	1665	1015	1642	1895	2131	1626	2586	1342	1442	1490	3002	1530	1895	1446	2295	1846	2122	2	958	1917	3823	2034	2086	3583	3	1444	2203	1952	2475	5689	1642	2537
199	1173	5953333	46	46_1173	3042	1787	2888	2480	1805	4622	4454	5313	6481	3120	1578	1304	5701	3547	3599	3096	4766	5105	1796	5407	4910	2331	2899	2170	2643	3028	3935	4195	1985	2360	6420	2047	3701	3076	2888	3206	8424	4407	4135
200	1219	6030000	46	46_1219	8668	7277	8983	8243	6130	6484	12230	11969	13575	6413	6365	6191	12416	12016	17500	12197	14779	8770	11347	12955	21353	8491	7047	8835	6665	14239	11174	8093	6650	5301	10429	14095	12149	7674	6611	9277	9322	14613	12879
201	1249	6080000	46	46_1249	850	2	3	2	595	864	3	1282	877	407	1231	1069	2	3	1827	2	1518	3	966	2	2189	860	620	656	3	1857	2040	868	1642	1470	2	2166	2762	797	1219	3	2	2208	2524
202	1296	6158333	46	46_1296	3193	2494	2851	1123	1707	3063	11740	10795	7794	1762	1412	1175	3143	3142	2097	2923	2972	2746	995	2987	2148	1372	2237	1415	2122	2573	1886	2253	4530	3814	4940	1699	2871	1915	2594	1259	3850	2780	3427
203	1333	6220000	46	46_1333	14156	16425	17135	9909	13450	8262	11888	10677	10735	8657	11540	15331	13737	13674	19532	13831	12711	9353	12636	12655	18252	16913	12101	16172	13049	16223	12500	9484	15997	17989	15851	11303	16006	13143	14842	11746	9851	14599	18559
204	1363	6270000	46	46_1363	1272	3	2	3	564	2	2012	2130	2278	802	3	2	2292	3	2	3	2673	2	3	2	3	2	3	2	3	2	3	2	1058	3	2	3	2	3	2	286	3	2	3
205	1421	6366667	46	46_1421	15005	12466	12317	72172	47312	31116	13907	11273	9735	34742	25743	23278	8855	503	12449	4394	5025	1903	2058	3409	12736	1596	868	2466	1083	13479	4006	465	47439	47793	6202	2	1116	679	1372	609	3606	3	9463
206	1459	6430000	46	46_1459	2	996	1380	3	1889	783	2	3	2	3	1256	1667	2	582	3	2	3	2	3	2	3	2	534	873	3	2	3	2	2020	3	2	3	2	3	310	2	3	2	3
207	1495	6490000	46	46_1495	2	3	2	3	2	1465	3	2	3	2	3	620	2	3	2	3	2	3	2	3	2	3	322	2	3	2	3	2	3	2	3	2	3	2	3	2	3	2	3
208	1528	6545000	46	46_1528	525	2	3	1443	551	1042	2552	1470	1458	835	885	575	794	2	760	1226	1235	704	446	554	975	3	2	194	931	1151	3	357	1951	1795	871	905	952	247	518	669	674	1321	829
209	1561	6600000	46	46_1561	1121	741	2	1468	1078	2798	1513	1898	2652	1767	1049	655	2455	1701	729	1201	1640	2113	3	1516	1119	513	1043	715	1593	959	1402	1436	1108	727	2114	1146	1307	973	1191	1019	2593	1412	1169
210	1637	6726666	46	46_1637	7518	6184	7511	4892	2	3625	3	2	3	3766	2	3	2	3681	5937	3	10408	4138	5325	4696	5583	4566	3883	4653	4793	5748	4768	957	8485	7444	6500	4801	5075	996	2	3	3843	5139	4278
211	1670	6781667	46	46_1670	27087	21973	28105	3692	4016	1927	84245	87199	125097	2653	4943	4746	55077	4348	10199	57678	49194	4268	7715	6865	8397	2485	2071	3693	5808	12539	5643	3777	41223	33353	15897	5811	14070	3841	3910	5652	22372	15075	16746
212	1710	6848333	46	46_1710	2	421	3	2	1392	1063	3	2	3	2	4102	3	2	3	2	1167	1780	4077	1007	714	1323	3	2678	2148	2	4837	9193	2620	3	2	3	9941	6489	3178	4722	5233	2	12067	4209
213	1741	6900000	46	46_1741	4608	5255	11365	2314	5711	6965	7865	7036	3013	1830	9636	6194	5240	4250	6922	11088	10819	3	6221	4850	6733	8454	5043	5861	8061	8086	8747	6512	9120	9080	11854	10630	14307	5932	5678	5988	13485	12213	9170
214	1778	6961667	46	46_1778	11662	10147	11093	2	3	2	3741	3	2	3755	6612	4104	3499	7009	3	384	4877	9625	12741	2	8565	13158	10625	14482	9897	26388	30464	20371	10446	14165	26851	34915	49988	14380	18858	32040	36482	37784	51399
215	1816	7025000	46	46_1816	345	3	555	222	2	3	2	3	2	3	2	3	2	3	2	3	2	3	2	3	2	3	2	3	2	3	2	3	2	471	933	3	2	3	235	2	1617	3	2
216	1882	7135000	46	46_1882	1123	3	1221	1413	1455	1101	1070	1243	1674	1006	1119	1350	1695	804	1719	1308	1333	824	1544	1207	1303	1281	1097	1371	1739	1442	931	974	12154	2477	1325	1393	1966	1240	1083	1859	1767	1859	1786
217	1897	7160000	46	46_1897	2	3	2	3	2	3	2	3	2	1288	3	2	3	2	3	2	3	2	3	2	3	2	303	3	2	3	2	3	2	3	2	1403	1349	3	242	828	2	3	985
218	1934	7221667	46	46_1934	2853	2	3020	2523	3	2522	2312	2436	6317	2176	1862	977	6491	1345	11068	6312	6224	1431	2436	6156	11431	640	2003	743	5752	15046	5307	2565	2	3	6652	12935	7307	537	1591	2892	6137	8613	6280
219	1993	7320000	46	46_1993	15675	11654	13870	9916	2129	3381	64329	64443	97936	7692	4163	4138	31246	5717	15651	31840	29235	6113	8589	9222	20389	3751	3449	4670	6148	13745	8345	8499	24359	15304	6317	3916	7703	2367	3802	7109	5834	11530	5647
220	2000	7331666	46	46_2000	2	3	2	1192	2996	3	2	3	1043	2	3	2	3	2	3	2	3	2	3	2894	2	3	2	3	2	5796	3	2	3	2	3	7743	2	3	2	3	2	3	2
221	2082	7468333	46	46_2082	3	2	3	878	2	3	2	3	2	1184	3	2	3	2	3	2	3	2	3	2	3	2	3	2	3	2	3	2	3	2	3	2	3	2	3	2	2607	3	2
222	2123	7536667	46	46_2123	3	2	3	2	3	2	3	2	3	2	3	2	3	2	12324	3	2	4613	3	8444	10968	2	3	2	3	2	7605	3	2	3	2	8921	8742	3	2	3	2	3	7468
223	2152	7585000	46	46_2152	65014	41014	50714	102971	88313	94896	64384	62068	91760	100500	70100	60373	35311	10229	29048	36645	32601	6219	15085	9127	15015	7861	12627	21752	14641	17117	13000	7265	90095	87682	33855	12135	20691	6908	13258	11423	26714	24098	11926
224	2200	7665000	46	46_2200	35341	32057	37022	20246	15051	2	75955	74747	107445	12161	3	2	68931	10257	31203	69457	64547	10173	13231	12340	13761	12163	10944	13110	11807	13314	12209	10216	3	2	11062	11786	12501	10525	10945	12498	11328	12358	12089
225	2277	7793334	46	46_2277	11188	10793	11621	5420	4838	4799	12272	10960	14146	5948	4975	5587	14635	4477	19908	17036	15090	4650	6356	16131	20185	5492	4586	5481	6744	23676	16281	5089	5060	6360	16699	20654	19174	3738	5616	6103	16751	19317	17809
226	2329	7880000	46	46_2329	3	3506	3142	3100	4145	3708	6343	2	6300	2883	3	2878	2	2212	7071	5527	5651	1935	2492	5392	5785	2879	2609	2751	3724	6702	4124	984	2463	2502	2879	4665	3931	2582	2333	2360	2516	5436	3882
227	2366	7941667	46	46_2366	4201	3751	3794	4849	3458	3049	10862	10570	13730	3960	3455	3484	4208	2894	5629	4684	5647	3855	4603	3347	4874	3442	3287	4289	5420	5495	4192	4227	3874	3967	3955	3584	5262	3295	2957	5166	3208	5097	4165
228	2411	8016666	46	46_2411	420	3	456	442	695	444	500	2	3	388	684	718	556	2	621	331	717	3	2	254	632	3	2	648	608	601	459	3	790	989	535	319	519	404	383	395	328	637	658
229	2491	8150000	46	46_2491	4406	3750	4522	5966	6842	4328	21879	20715	17078	2724	3796	2	4052	1090	2174	2373	4714	1018	1563	1176	1202	560	838	733	819	1383	1015	370	15489	5687	2265	818	1701	3	527	587	2073	830	2
230	2554	8255000	46	46_2554	240	3	271	281	2	3	2	3	1714	2	3	2	3	2	692	3	423	2	3	643	821	2	3	157	2	1031	665	3	2	3	741	644	732	2	3	2	711	434	553
231	2599	8330000	46	46_2599	7667	6117	7250	3185	2486	2522	11367	11549	16779	3314	2631	2972	13801	2495	15106	12020	11396	2491	3706	11108	14834	3	2694	3005	4032	16094	10708	3008	3778	1600	8926	13288	11463	2142	3250	241	8915	10396	10566
232	2639	8396667	46	46_2639	18381	9885	12448	2436	2920	3293	53291	53510	88071	2	3	2	50291	1760	4653	44552	39716	3	2	3	2005	3678	2	3	2	3054	3433	3	15749	4030	3996	2	1153	3	2	1224	4301	1933	3
233	2685	8473333	46	46_2685	2	3	2	3	2	3	2	3	2255	2150	1318	1342	2	3	2	3	2	998	3	2	3	2	3	2	1717	3	2	3	2	3	2	1633	3	2	3	2	3	2	1153
234	2759	8596666	46	46_2759	3718	3553	3131	6159	4625	2417	4577	3901	6036	3949	4127	4576	5510	2100	7222	4632	4618	1368	4354	4740	6662	3325	1988	3695	277	7701	3929	1923	5233	5834	3325	5345	4161	2294	2663	3760	3054	4349	4053
235	2839	8730000	46	46_2839	1257	979	1181	1405	843	866	1852	1761	2745	1090	912	1015	4139	500	5041	3662	3429	480	1012	2588	3375	882	785	810	922	1468	795	642	763	985	900	1196	1042	491	791	1281	665	1346	914
236	2940	8898334	46	46_2940	1352	702	1106	1340	1229	1102	1159	917	966	1256	586	372	1280	871	1889	1454	1167	614	3	1383	1550	535	884	356	881	2116	1038	1089	661	502	1350	1651	1519	518	1137	389	960	1460	1134
237	2973	8953333	46	46_2973	2	3	511	2	285	3	2	3	2	3	2	3	2	3	2	364	3	2	3	2	274	3	2	3	2	3	2	3	2	3	2	3	2	3	2	3	2	321	3
238	3009	9013333	46	46_3009	886	2	527	426	413	699	1781	1538	2665	613	3	527	2750	2	873	1693	1307	437	658	1823	1006	561	572	726	676	430	3	704	2	504	595	556	367	602	433	1208	360	627	440
239	3091	9150000	46	46_3091	640	3	285	427	345	2	2380	1931	2288	616	3	463	737	324	704	852	1168	799	695	116	453	2	3	369	2	330	3	2	575	447	3	2	3	224	2	272	3	341	2
240	3123	9203333	46	46_3123	340	3	2	194	3	2	3	2	3	2	3	214	2	3	496	187	2	634	404	284	3	2	3	210	2	587	3	2	3	2	3	321	2	3	2	3	2	309	3
241	3229	9380000	46	46_3229	1736	1387	1253	902	2	3	1882	1057	3235	921	423	591	1927	414	2473	1329	1332	550	637	1699	2669	623	567	755	427	3025	2144	830	514	813	2	2590	2378	612	809	550	753	2213	2126
242	3269	9446667	46	46_3269	2543	2413	2173	2137	3	2	1181	588	2213	2892	2676	2356	1641	2242	3802	1595	1565	2030	3626	2865	4416	3112	3515	2929	1019	4894	3766	3285	2321	854	2118	4604	4075	2345	4444	506	2606	3587	3984
243	3318	9528334	46	46_3318	1350	788	611	1070	2270	2634	6252	6041	13482	1154	364	561	2661	321	1232	1674	1495	405	531	829	1171	342	3	435	876	1778	483	501	656	631	443	849	506	342	482	430	364	976	611
244	3364	9605000	46	46_3364	8859	6722	6516	15505	8783	11395	16968	13099	23561	16967	9745	11233	21042	1882	22248	15230	15828	947	4661	12591	19001	1105	2052	1787	7578	15652	2323	3058	6222	6340	3489	9616	2568	1124	1851	2871	1868	8945	2336
245	3413	9686666	46	46_3413	3653	2	2474	1000	3	954	2	3	3694	1149	2	942	3098	1289	3891	2120	3	1074	2	3	4601	2	1313	3	2	4076	2469	3	787	2	3	2	3	2	573	2013	2104	2216	3072
246	3478	9795000	46	46_3478	3	2	3	2	1480	3	2522	1288	2	3	632	2	3	2	3	2	3	503	1056	2	3	1058	2	1021	2187	3	2	1008	3	814	2	3	2	812	3	2	3	2	3
247	3528	9878333	46	46_3528	2	3	2	301	399	630	812	426	627	3	2	3	420	2	3	2	3	2	3	792	2	3	2	3	301	2	3	2	3	2	3	2	3	2	3	2	3	2	3
248	3586	9975000	46	46_3586	1696	1498	281	745	774	708	2	3	2	1147	778	1072	1046	1183	776	900	957	951	1612	563	1201	1515	1323	325	1614	1391	3712	1465	1046	737	4520	7121	4049	1189	302	1608	4966	693	789
249	3627	10043333	46	46_3627	520	3	2	4449	768	1125	3	2	3	853	478	624	2	3	2	280	220	3	2	3	2	3	2	3	2	3	2	3	861	942	2	3	2	3	2	3	2	3	2
250	3720	10198334	46	46_3720	1291	864	1367	500	600	730	798	804	1173	413	762	880	1498	677	1738	952	915	1967	677	1099	1636	664	769	565	1141	2346	1180	414	781	934	1243	1588	1288	638	1117	835	1198	1365	1666
251	3772	10285000	46	46_3772	1309	743	758	630	456	1275	2599	1900	4993	3	446	690	9623	879	11083	5774	6910	2	480	6438	9011	3	2	3	1317	2	3	2	3	497	2	890	4632	3	2	737	3	4107	4864
252	3811	10350000	46	46_3811	2	3	2	3	2	3	2	3417	5360	3	2	3	4411	2	3	2	3	2	3	2	3	2	3	2	3	2	3	2	3	982	2	3	531	2	3	2	3	2	3
253	3847	10410000	46	46_3847	4740	2567	2483	3936	1977	3377	29076	28676	49524	6723	2164	3009	10570	2	6034	7182	6223	2933	1678	4640	6316	2552	954	1121	3	7103	4758	4347	5826	5952	3926	6211	837	770	1437	1415	3972	2	3
254	3885	10473333	46	46_3885	2	3	206	2	3	2	653	3	1417	2	3	2	3	2	3	378	314	2	3	577	884	2	3	2	3	1045	767	316	2	3	662	2	3	2	262	3	623	2	3
255	3930	10548333	46	46_3930	1493	818	749	646	2	584	1725	1799	2887	905	3	550	2440	853	1902	1690	1638	360	608	1837	2069	2	1056	602	415	1462	1588	1440	971	639	1125	1134	1424	768	1478	1290	701	644	1139
256	3978	10628333	46	46_3978	1626	1313	1359	1613	865	1281	1078	1335	2316	1593	764	1110	2235	885	2579	3	2	951	1169	2092	2490	916	1036	871	774	2527	1632	1345	919	870	1361	1978	1467	736	1104	1149	1195	1368	1623
257	4027	10710000	46	46_4027	3	2	3	2	725	833	3	2	3	1212	1018	1116	2	841	2147	1030	1364	914	1284	1688	2115	975	1029	965	527	2480	1434	3	928	341	1245	1776	1392	766	1254	224	1110	522	1539
258	4100	10831667	46	46_4100	7182	6254	6574	1531	3202	3293	2312	2351	3006	4027	3907	3635	4246	3862	6327	3294	2860	3365	5046	5537	5509	3607	3946	3705	2660	7050	5033	3326	5368	3810	11523	5099	4059	1831	3488	2229	4060	2885	3621
259	4152	10918333	46	46_4152	2	3	160	2	3	2	3	2	3	2	3	2	3	2	389	3	2	3	2	317	324	3	2	3	2	487	3	2	3	2	3	347	296	193	168	2	353	278	3
260	4201	11000000	46	46_4201	2	3	2	950	3	2	3	2	3	2	3	2	594	3	2	3	2	3	2	3	2	3	2	3	2	3	2	3	1233	2	3	2	3	2	3	2	3	2	3
261	4223	11036667	46	46_4223	776	807	1753	818	1291	1259	773	551	872	901	1301	1119	1198	954	2084	978	832	511	1308	965	1900	1285	1042	642	1148	2374	1388	866	649	1320	1332	1778	1557	1110	734	784	1228	1452	1620
262	4287	11143333	46	46_4287	573	2	378	663	3	2	510	3	1577	2	3	202	1353	2	994	236	617	3	2	909	1169	3	2	3	2	1133	880	3	2	315	3	1152	851	2	274	3	2	672	831
263	4372	11285000	46	46_4372	3	2	3	212	2	3	2	3	2	3	2	3	389	2	3	299	391	2	3	321	290	2	3	2	3	406	2	3	2	3	2	580	3	2	3	185	2	303	340
264	4417	11360000	46	46_4417	3	2	3	2	3	2	3	2	3	2	3	2	3	2	3	2	3	2	3	367	156	2	3	2	3	247	2	3	2	3	2	3	2	3	2	3	2	3	2
265	4455	11423333	46	46_4455	2205	1793	1689	1311	1008	927	1347	1336	2228	924	726	527	2984	681	5551	2256	2401	954	1114	4048	5746	783	855	918	1405	7321	4562	1170	924	949	4573	6539	4724	605	1086	1318	5139	4873	5327
266	4511	11516666	46	46_4511	3	2	3	2	3	2	3	2	3	2	3	2	3	2	1061	3	164	2	3	872	1069	2	3	2	421	1857	977	3	2	3	1061	1539	952	2	3	356	1144	1138	1307
267	4540	11565000	46	46_4540	3298	2166	2479	1966	1129	1293	1198	786	1909	3112	2035	2018	2074	2410	3671	847	1137	2961	3884	2666	3928	2534	2923	2745	1073	5455	3322	3865	1667	1897	2939	4272	3171	1986	3724	3279	2900	3407	3712
268	4622	11701667	46	46_4622	382	2	353	1184	911	795	393	3	319	2	3	509	2	465	794	3	222	2	551	682	1014	530	467	463	605	362	802	3	2	351	3	2	3	487	2	469	3	709	2
269	4630	11715000	46	46_4630	3	2	3	333	577	492	2	3	2	3	2	3	569	2	3	2	320	3	2	275	318	3	2	3	2	1066	3	2	3	390	723	910	685	2	399	3	605	2	859
270	4675	11790000	46	46_4675	1769	1387	1174	1176	600	723	3782	3213	5151	1661	1193	980	2841	1330	4110	1878	1941	1648	1814	3053	3906	1423	1437	1312	1192	4344	2334	1921	1280	973	2071	3203	2298	1098	1856	1717	2291	2639	2572
271	4715	11856667	46	46_4715	3	2	3	2	3	2	1297	3	2	3	2	3	2	3	765	2	3	2	3	392	555	2	3	2	3	593	2	3	2	3	362	713	394	2	124	3	450	370	2
272	4752	11918333	46	46_4752	1000	880	829	469	3	2	1294	1039	1592	587	3	452	1506	437	1769	1232	1308	562	512	1348	1898	2	566	617	606	1979	1161	429	510	628	1327	1673	1272	423	751	1010	1355	1197	1298
273	4791	11983334	46	46_4791	3	2	3	164	2	3	2	3	2	3	2	3	441	2	3	437	350	2	3	2	3	2	3	2	3	2	3	2	3	2	3	2	3	2	3	2	3	2	3
274	4842	12068334	46	46_4842	2	3	133	2	3	2	3	2	3	2	3	2	3	2	3	2	339	3	2	109	474	3	2	3	2	475	3	2	3	2	3	334	2	3	840	781	2	144	3
275	4863	12103333	46	46_4863	9041	7192	8289	3965	2317	3028	11376	3395	5810	5222	2043	2573	6306	2017	8215	5538	6738	2556	3309	5585	4329	1945	1987	1411	1407	4932	3020	3910	3698	2500	2974	4317	3258	1712	2	3	3549	3143	3470
276	4950	12248333	46	46_4950	12328	10665	10927	12719	9258	10711	5000	1716	2	1110	3	340	2	417	894	8009	8940	3	2	8154	5645	455	491	399	1392	6409	4220	633	2720	2590	4493	5757	4723	342	799	1055	5184	4221	5191
277	4974	12288333	46	46_4974	3	2	3	2	3	2	3	2	3	2	3	2	3	2	3	2	3	2	3	2	769	3	2	3	2	3	2	3	2	3	473	663	2	3	2	3	2	403	3
278	5023	12370000	46	46_5023	2	3	2	12291	9159	3	2	3	2	3	2	3	2	3	2	3	2	3	2	3	2	3	2	3	2	2571	3	2	2908	2975	3	2	3	2	3	2	3	2	3
279	5038	12395000	46	46_5038	29780	27782	34264	35528	29392	35368	29192	26149	33198	2307	915	786	31599	5416	29624	29883	29309	3183	3063	31273	2	1751	1825	651	2471	3	3953	1490	30941	27933	1540	3028	2330	1181	1208	2870	2471	2978	3554
280	5070	12448334	46	46_5070	34442	35071	28196	2	3	2	3	2	3	1687	1293	636	2	437	12631	3	2	3	1519	9292	2	3	420	307	2	3	2	3	2	3	2	1140	1107	3	2	2076	439	3	639
281	5150	12581667	46	46_5150	32409	31213	31011	36056	34694	34569	43740	42513	47426	1994	653	979	44947	1502	37411	48351	45812	755	840	29454	7100	398	479	422	2011	3914	984	395	29218	31731	644	632	641	249	766	1191	546	2663	882
282	5143	12570000	46	46_5143	2	6884	8302	3	2	3	28502	2	21514	3	2	3	2	3	2	3	26270	2	3	2	2067	3	2	3	608	1586	2	3	2	3	2	3	2	3	222	2	3	841	2
283	5191	12650000	46	46_5191	3775	2873	2734	32365	28684	31686	36452	35521	38590	984	511	3	36337	2	2563	39021	37487	340	531	1785	729	3	2	207	708	1302	3	2	2290	1723	358	568	416	3	235	885	347	1066	2
284	5215	12690000	46	46_5215	3	2	3	6583	2	3	12657	11546	2	3	2	3	2	3	2	3	11986	12431	2	3	2	3	2	3	2	3	2	3	529	2	3	2	3	2	3	2	3	209	2
285	5298	12828333	46	46_5298	291	598	3	919	2	3	3195	2307	5536	2	3	162	4445	2	1113	5208	2826	3	2	1040	764	3	2	195	3	819	458	2	3	2	3	320	364	2	3	2	3	265	290
286	5355	12923333	46	46_5355	569	458	510	1017	528	1030	704	2	3	433	2	217	615	3	508	2	542	3	2	269	3	2	3	2	3	444	2	3	513	339	2	3	2	3	158	2	3	188	2
287	5465	13106667	46	46_5465	314	3	572	403	2	3	471	2	318	3	2	280	473	3	516	234	517	2	3	341	388	2	3	304	2	426	3	2	3	457	2	468	367	372	262	449	441	355	3
288	5469	13113334	46	46_5469	2	3	2	3	2	3	2	3	2	3	2	3	2	3	2	196	425	3	2	3	2	3	2	3	2	3	2	3	2	387	3	2	3	2	3	2	3	2	3
289	5526	13208333	46	46_5526	2232	1908	2047	3123	2562	2633	2825	2093	2586	2363	2076	1926	2192	1702	3198	2334	3001	4179	1876	2319	2451	1730	1764	1713	2672	2889	1966	2148	2386	2347	2460	2260	2289	1567	1540	2226	2069	2085	2054
290	5557	13260000	46	46_5557	275	2	3	3220	2264	2835	2	3	2	3	2	3	2	3	2	3	2	3	2	3	2	3	2	3	2	3	2	3	909	598	2	3	2	3	2	3	2	3	2
291	5647	13410000	46	46_5647	3	2	271	3	2	3	697	576	839	2	3	150	586	2	413	652	605	3	2	318	342	3	2	3	2	421	3	2	3	2	3	2	3	2	3	2	3	2	3
292	5685	13473333	46	46_5685	599	467	562	764	506	704	5283	5053	6491	817	2	464	5959	627	3729	5625	5135	564	544	3111	389	394	421	231	730	4176	3	469	519	2	2697	3476	3	381	403	178	3001	2529	359
293	5715	13523334	46	46_5715	1054	775	1062	2	3	2	1873	3	2057	2	3	2	3	2	3	2	2345	3	2	3	2	3	2	3	2	3	2	3	2	3	2	3	2	3	2	3	2	3	2
294	5775	13623333	46	46_5775	3	2	128	3	2	3	2	3	2	559	3	209	2	554	3	2	147	570	679	3	2	3	2	335	3	351	2	3	2	3	2	3	2	3	2	3	2	3	2
295	5822	13701667	46	46_5822	1470	1021	881	1783	393	930	929	696	2233	1960	3	404	2668	1088	3151	2186	2137	930	1728	2143	2336	2	548	561	962	2514	1418	1815	1325	1430	861	1183	531	285	358	1218	704	602	601
296	5991	13983334	46	46_5991	3	2	3	288	2	3	2	3	2	3	2	3	2	3	2	3	2	3	2	161	3	2	3	2	3	2	3	2	3	2	3	2	3	2	3	204	2	154	3
297	6008	14011666	46	46_6008	542	2	512	3	2	3	478	536	843	2	3	2	975	3	2	1389	934	3	2	3	2	3	2	3	2	3	2	3	2	3	2	3	2	3	2	3	2	3	2
298	6152	14251667	46	46_6152	1508	1127	1260	1608	847	1262	1106	1056	1963	1590	638	872	1740	1159	1786	1239	1331	1655	1439	1237	1339	797	969	928	1571	1612	976	1743	1016	1009	977	1325	682	923	1034	1293	1216	873	1932
299	6190	14315000	46	46_6190	425	401	3	711	2	578	3	2	3	407	2	299	3	2	3	2	3	593	482	109	2	380	3	287	2	3	2	3	365	439	2	3	2	328	325	320	3	104	359
300	6237	14393333	46	46_6237	600	509	390	1261	600	688	890	1198	3460	663	542	457	1306	483	811	687	1154	1145	561	360	538	500	497	457	811	647	419	790	619	437	617	553	633	410	504	718	454	508	565
301	6834	15388333	46	46_6834	2	3	2	581	3	2	3	2	612	348	3	2	356	3	2	3	178	2	3	2	3	2	3	2	3	2	3	374	2	3	2	3	2	3	2	199	3	2	3
302	6938	15561666	46	46_6938	425	2	532	3	2	3	2	3	2	3	2	3	2	3	2	215	3	2	3	337	291	2	3	2	3	2	3	2	3	2	3	2	3	2	3	2	3	286	316
303	7004	15671667	46	46_7004	2	3	283	355	2	3	2	3	2	3	2	3	478	2	3	2	288	3	2	256	209	3	2	3	2	3	2	401	3	2	3	2	3	2	143	308	3	193	369
304	7268	16111666	46	46_7268	1347	993	1199	378	2	414	2993	2119	2870	3	2	264	3452	3	3887	3280	3729	2	403	2986	2492	3	2	259	974	3669	2352	443	3	2	3041	3032	2660	211	383	348	3247	2447	2542
305	7342	16235001	46	46_7342	345	3	369	507	2	3	460	382	778	2	3	151	964	2	1429	828	1015	2735	3	1044	989	2	3	2	3	1556	802	352	2	3	1093	1144	959	2	3	215	1262	844	932
306	7939	17230000	46	46_7939	2	3	2	311	3	2	3	2	335	3	2	3	2	3	2	3	2	3	2	96	3	2	3	2	3	2	3	2	3	2	3	2	3	2	3	149	2	3	2
307	7977	17293333	46	46_7977	2329	1784	2724	3340	1606	2624	11055	9976	15432	895	441	223	11195	3	6450	9906	11808	2	3	2984	2	3	2	3	2	3	2	3	1917	2	3	2	3	2	3	2	3	2	3
308	8059	17430000	46	46_8059	2	3	2	3	2	3	2	3	717	2	3	2	3	2	3	332	330	2	3	171	2	3	2	3	2	3	2	3	2	3	2	3	2	3	2	3	2	3	2
309	45	4073333	47	47_ 45	3	21365	2	3	2	3	27571	34489	58460	2	3	2	59265	3	24691	42381	2	3	43979	2	29055	3	2	3	2	27342	3	47713	2	3	2	3	10985	2	34335	3	2	24771	3
310	90	4148334	47	47_ 90	13380	15196	15837	38534	30259	26876	109307	108297	181765	36434	18357	22687	61243	18039	39851	72735	32343	3397	2	17087	21280	32317	35440	25399	31947	14896	29034	3	29151	21158	15995	21560	25635	24697	5513	39587	8729	13292	24897
311	90	4148334	47	47_ 90	2	3	7994	3643	2	3	2	3	2	3	2	3	2	4294	3	2	53023	3	2	10767	3	9103	2	3	2	3	2	3	32232	16123	3821	2	3	2	3	2	3	8311	2
312	156	4258333	47	47_ 156	13618	8471	7179	19927	27287	23860	22726	21963	22886	15366	26726	16000	20472	13489	17389	28164	27301	28290	14982	19281	20120	21676	17294	16565	18656	18349	23670	21866	24743	31071	29561	14598	29114	17264	17557	18645	17329	24798	21815
313	197	4326667	47	47_ 197	2467	4051	3	2	3	776	2900	2084	2621	2	3	1112	646	535	3663	2222	2723	816	1371	2398	3365	1310	2	1587	1080	2934	3	966	3698	24924	2	3	2232	690	519	2	3	983	1665
314	270	4448333	47	47_ 270	48799	48759	68028	83657	92306	80789	70613	67787	91823	65818	88220	65029	74829	49576	77533	81159	85162	70857	70476	72697	79063	72950	67008	67862	57836	77167	78747	74573	91981	82286	75515	68487	86996	66082	68026	72992	75147	71292	75443
315	312	4518333	47	47_ 312	11362	13329	6583	15458	13599	24370	33340	20542	15006	9368	29561	23361	9907	17876	19569	37336	36838	15052	17507	20847	18916	21019	20788	17232	25104	19383	15903	5426	28843	24549	28211	19625	37449	18689	20419	13591	18342	33563	24636
316	362	4601666	47	47_ 362	5651	5579	2	8021	3	8585	8324	7550	9451	2	849	1722	5405	1131	10793	5762	5064	3	813	11168	3882	988	733	1397	1434	1676	660	727	5100	6666	1715	2	739	906	3	390	2	1312	1226
317	442	4735000	47	47_ 442	987	1160	3	1792	2	1674	1683	2270	3	523	1704	1541	706	1424	2177	2313	2253	2670	1001	1307	1902	1853	1441	1722	1848	1811	1206	1175	1993	2792	1542	2	1452	1861	1149	1309	3	1641	2091
318	479	4796667	47	47_ 479	2	3	2	3	2	3	2	3	2	3	2	3	2	3	2	3	714	2	3	2	3	2	3	2	412	3	2	3	543	2	3	2	3	2	3	2	3	299	2
319	528	4878334	47	47_ 528	3	2	3	2	3	2	3	2	3	2	3	350	2	3	2	3	2	987	3	2	523	573	3	882	2	3	2	3	1579	2	3	2	3	2	639	392	3	2664	2
320	555	4923333	47	47_ 555	27316	25402	22055	13639	12177	13056	10410	8995	12610	8104	7364	5871	8043	6391	18818	11063	5624	7017	6306	16869	22285	4218	4646	4191	2556	17792	17393	2617	16127	197944	12331	7657	10412	4559	4364	4340	6341	11752	12196
321	604	5005000	47	47_ 604	13266	11297	3660	6211	3	4059	10066	7627	10421	7794	11422	8258	10620	5922	14096	10472	8834	8211	6463	12576	13268	5612	3999	6193	4422	13904	10498	4369	4311	16616	7924	2959	7592	2636	5399	6985	2	7792	8003
322	654	5088333	47	47_ 654	401	3	2	3	2	3	2	3	1160	2	3	2	632	3	2	3	2	3	2	611	3	2	3	2	3	2	3	2	3	2	3	2	3	2	3	2	3	2	3
323	685	5140000	47	47_ 685	11704	2	3	7471	6364	2	15780	12541	9696	5345	18404	11777	12718	9724	11421	20646	17580	3	9983	10741	11113	14538	11420	11862	9974	10715	13635	6097	19028	15129	2	7131	18877	12648	11061	10426	3	15302	11573
324	717	5193333	47	47_ 717	257473	201912	227275	323193	270214	225197	354283	321975	382501	158191	159483	69842	168625	110533	179461	192984	232310	126530	157819	237985	142620	83190	79994	131855	95939	137150	135812	69577	347193	201848	60572	137286	149963	69087	105605	67836	53837	175555	96130
325	764	5271667	47	47_ 764	6908	6181	2	7235	2452	9194	9159	8537	11937	7198	6445	5073	9291	6734	6852	8241	4338	7921	5676	9629	7138	5905	6474	5522	6719	5647	7167	5428	9537	6183	10333	1167	7720	6289	6152	6014	3	7815	9229
326	807	5343333	47	47_ 807	5127	5030	2	6390	3	1127	10067	9803	11132	2046	3622	2797	2	3261	4721	5143	3584	4776	2968	4565	5243	3665	3005	2947	3217	4307	4687	577	6222	5537	6005	3	5610	2802	3188	1882	2	6186	5610
327	832	5385000	47	47_ 832	3	2	3	2	3	2	3	2	900	1277	3	2	3	2	3	2	3	2	3	2	3	2	3	2	3	2	3	708	2	3	1232	2	3	2	3	2	3	2	3
328	882	5468333	47	47_ 882	35322	45227	31765	4992	2	1647	132193	102374	67593	2212	4421	3320	53531	4361	14078	72283	48378	5677	10723	6490	9193	2739	3089	3982	3665	15783	4467	1672	48800	49535	4136	3	4455	1772	4301	3843	2	12722	4186
329	924	5538333	47	47_ 924	3	2	3	1323	2	1127	3	2	716	3	2	1627	3	2	3	2	1457	2577	219	661	3	2	3	2	3	2	466	398	3	2	1172	3	2	3	611	462	2	370	3
330	980	5631667	47	47_ 980	51698	37701	42263	29276	8130	13374	141688	145910	247866	12960	16422	9416	105326	12783	46666	103320	92728	15301	21124	31844	30237	2827	10635	13320	15673	29279	15875	7055	93894	62826	21160	11578	18278	7258	13139	4709	9335	32249	12747
331	1061	5766667	47	47_1061	12292	8897	4704	12688	8855	17332	16713	13100	14988	13765	14311	13058	12553	13152	12156	12543	14015	16056	11138	11762	10846	11960	14258	14516	13981	12089	11041	17317	15775	14320	16585	7395	12067	15172	15289	13745	2	12637	11307
332	1110	5848333	47	47_1110	4351	6727	3	4446	2531	5158	6430	4787	2335	4460	7171	7027	3424	6609	4006	5452	5677	3756	6879	6017	4978	9607	6603	8475	3141	3840	6955	3300	2	7844	4703	3	4899	7395	5718	5764	2	5822	4758
333	1173	5953333	47	47_1173	6824	5772	3216	5678	3	9938	11353	11676	13245	6167	8059	4412	12516	7645	8671	8657	11245	10810	4143	13169	11372	5311	6546	5593	4554	8158	9087	7003	11276	12479	13303	5003	9799	5659	5940	6577	9908	10174	9588
334	1219	6030000	47	47_1219	18219	16426	14150	17871	9570	15673	29814	27917	32193	12830	13738	13035	29542	15550	42966	31465	35743	18441	23217	33279	49693	19221	15702	19482	13443	33525	23914	17038	15130	12095	21472	28844	25491	16058	13859	18716	12774	32908	27157
335	1251	6083333	47	47_1251	2	3	2	3	2	3	2	3	2625	827	2	3	2	3	2	3	2	3	2	3	2	3	2	3	2	3	5700	2	3	2	3	2	7522	3	2	3	2	3	2
336	1294	6155000	47	47_1294	3	2	3	2	3	2	3	2	3	3615	2	3149	3	5785	2	3	2	6040	3317	8235	3	2	3428	3	4543	2	3890	3692	5212	3	8023	2	4868	2671	3933	2948	3	2	5566
337	1296	6158333	47	47_1296	15965	18119	11369	4841	13433	4215	74189	64475	41873	12315	2774	3506	13420	18687	10351	15223	12023	14070	7652	18574	8712	3066	17195	3636	17507	13157	17324	14263	29124	24367	23014	13163	21332	18351	20770	16713	10085	10494	25748
338	1334	6221667	47	47_1334	19293	22126	18372	12469	3	12813	18091	15652	15476	7163	15494	21096	19266	2	26458	19497	17557	3	17027	2	25707	23653	3	22596	2	23578	3	2	22648	27716	3	1274	2	3	2	3	2	20820	3
339	1421	6366667	47	47_1421	120731	105002	94449	592931	395945	264369	98169	70179	53223	293805	223807	202343	43289	6389	51906	52801	46220	8366	17122	23111	49070	2	9447	24479	19547	54089	36534	3426	396433	401191	24484	32699	39324	5501	11756	6207	11880	30027	35055
340	1458	6428333	47	47_1458	3	8037	5721	2	3	6444	2	3	349	6614	12751	13842	2	3782	3	2	3	2	3886	3	2	3	5141	7101	2	3	2	3	19206	2	3	2	3	5216	3172	2	3	2	3
341	1529	6546667	47	47_1529	943	2	3	2	3	5661	6496	2589	2	4508	3048	2589	2040	3	2399	3223	2762	1210	1995	1273	2572	1177	2	3	2355	3220	1789	2	6206	7295	1969	3	2206	2	1427	2065	3	3046	2153
342	1561	6600000	47	47_1561	4320	3609	2	8398	2121	13006	6631	7928	11338	8262	5298	2849	10432	6797	4707	5151	7784	9686	2208	7738	5135	2996	5345	3571	7755	5055	5820	6807	4754	4441	10455	2259	5527	4390	5138	4616	7216	6088	6067
343	1635	6723333	47	47_1635	21818	3	2	3	2	3	2	3	2	3	2	3	2	13471	26991	3	2	3	2	19561	29166	3	2	3	20717	33035	19075	2	3	2	19657	24442	20699	3	2	3	12237	23475	2
344	1671	6783333	47	47_1671	40232	20458	42200	19433	14372	13971	119620	125880	180940	15691	19722	18870	81187	7486	16950	85947	74163	17288	22302	12389	14613	18960	15805	19634	10730	21233	10069	15625	64268	50862	10968	6976	11133	16122	15167	22787	14231	25160	18317
345	1672	6785000	47	47_1672	3	2	3	2	3	2	3	2	3	2	3	2	3	2	3	2839	2	7290	3	2	3	2	3483	3	2	3	2	1574	3	2	3	2	3	1892	2	3	2	3	7536
346	1676	6791667	47	47_1676	2	33773	20575	5100	3	3301	2	3671	3	4526	7118	3199	29505	2	1105	27984	29217	3798	13381	1603	1800	4482	2118	7128	3	5220	8567	4565	25649	24615	12487	5548	12315	2934	6001	7625	2	11237	14211
347	1742	6901667	47	47_1742	3	1273	2	3	2	6627	3	2	9180	3	9414	400	2	3	2	12048	3319	3	1917	2	3	1579	2	2395	3	2	3	2	9439	3	2	3	2	3	5128	2	3	2	3
348	1778	6961667	47	47_1778	8050	8178	10070	6381	4430	1370	9630	8988	5131	5905	1641	8380	9819	7184	16297	2485	12603	7842	10862	10958	17529	11085	8264	12133	12794	20793	24739	14678	1362	11937	20861	24529	38750	11282	14407	23249	25117	30017	40728
349	1817	7026667	47	47_1817	1217	1914	2	3	2	3	2	3	2	612	3	1099	1304	805	2	3	2	512	591	1982	2424	831	3	774	1978	2499	2938	2	3	1417	1753	2	3650	569	426	3	2	3428	3
350	1854	7088333	47	47_1854	9221	9675	8546	10566	7750	8493	8595	9999	9674	7907	10328	11546	10153	7845	13897	10436	11596	7317	11643	9619	11912	10671	8567	10600	14139	12579	10879	7971	12944	11049	8771	9637	12249	9307	8161	10967	6565	13004	12511
351	1884	7138333	47	47_1884	2554	2	3	2	3	1220	2	3	2	4661	622	3	4225	2	3	2580	2	3	505	2	3	2	3	2	3	2	4692	3	2	3	6726	4832	2	3	2	3	2	3	2
352	1916	7191667	47	47_1916	6904	7819	6778	6182	3776	9106	11765	13248	18144	2765	6080	6848	25030	5670	48836	27013	27564	5605	7042	28571	49498	6605	6079	6106	25558	64755	23084	11237	3	6742	29483	56887	32076	7888	5107	1689	22344	38507	28492
353	1964	7271667	47	47_1964	2	3	2	3	2	3	2	3	2	3	2	3	2	2612	3	2	3	2393	2	3	2	3	2	3	2	3	5236	2	3	2	3	2	3	2	3	2	3	2	3
354	1994	7321667	47	47_1994	25206	20659	24260	14456	4629	6766	93165	95304	148690	12470	9558	10226	58009	11614	33045	62523	59716	12411	18886	19869	41565	9171	8023	11133	12018	24300	19053	14355	39275	25270	10932	15322	15859	5571	8541	12591	7458	20783	13265
355	2031	7383333	47	47_2031	2	3	2	3	2	987	1609	1782	6484	3	2	3	2	1321	3	1381	1139	2	3	1428	2	3	764	710	2	3	2	3	1552	1461	2263	2	690	3	1297	2	3	1134	2
356	2088	7478333	47	47_2088	3	4194	5457	859	2	3	2	3	2	3	2	3	19364	2	3	2	3	2	587	3	2	3	2	3	967	2	3	2	3	2	3	2	3	2	3	393	12525	2	3
357	2148	7578333	47	47_2148	151729	116536	148255	143966	119532	127630	111478	109302	159123	137960	105122	2	90955	40484	66308	93116	86523	21403	41218	34423	42758	31658	32354	53847	45910	59726	45556	32015	137285	62835	101728	38734	54193	22603	41396	52229	61669	79004	36109
358	2181	7633333	47	47_2181	96882	94061	103316	103081	99858	3	87062	83286	109537	83304	2	98347	93254	72699	105726	103845	108765	68174	95576	83222	97352	88363	81883	94424	87106	91932	87097	75350	116230	3	75605	87305	89156	80875	79855	93161	73311	84607	90598
359	2277	7793334	47	47_2277	27661	28049	29752	12919	13064	12552	29717	28164	34899	15237	13953	16200	32813	11932	48079	43905	38969	12838	17933	42377	48552	15160	13505	13658	17801	54562	40323	12351	13952	16199	41921	50097	47336	11929	15202	16324	39041	48080	44565
360	2328	7878334	47	47_2328	13100	13392	10153	7581	14717	11792	16927	17003	14046	8146	10390	10677	11710	8652	19973	18125	18182	6990	10334	18951	17635	11087	11073	10391	11930	18279	14223	7277	9440	8120	10838	14273	13410	11811	9094	9444	6247	16584	13337
361	2364	7938334	47	47_2364	2	3	2	3	2	5362	3	2	3	2	3	2	3	2	3	2	3	2	3	2	3	2	3	2	3	2	3	2345	2	3	8109	2	3	2	3	2	3	2	3
362	2365	7940000	47	47_2365	7817	8668	6732	7809	7432	2876	15382	14579	16482	7301	8136	5029	6171	5707	11700	11322	11934	9572	9976	8938	9307	7142	7811	8421	10247	10770	8457	2	7664	7794	4055	7024	11101	7933	5936	10549	3779	9888	8665
363	2411	8016666	47	47_2411	3583	4650	3330	3802	6027	3	3778	5164	4020	3397	6325	2	3487	1457	4395	4007	4384	2466	4191	1859	3224	2286	4342	3711	2854	2657	2765	1983	6344	6457	3190	1301	4556	3805	2759	2343	3	3657	3076
364	2452	8085000	47	47_2452	2	3	2	3	2	3	5659	2	3	3790	2	3	2	2886	3	2	3	2	3	3025	2	3	2	3	4059	2	3	2	3	2	3	2	3	2	2083	3	2	3	2
365	2490	8148334	47	47_2490	7084	5360	6095	6449	6701	4507	32431	31384	25955	3	5090	4495	5255	2	5591	3408	5696	3	3897	1658	2	3628	3	3586	318	3815	2823	798	26318	7562	2	1991	3367	3	2	3673	889	3690	4706
366	2551	8250000	47	47_2551	1665	1258	1255	3	2	3	1314	1113	708	441	2	479	2271	393	3272	2207	1351	3	864	2600	4021	965	2	671	801	4990	3108	938	628	827	2684	2429	3009	3	765	954	1328	2298	2748
367	2599	8330000	47	47_2599	20127	16824	19248	8098	7254	7475	27109	26309	37907	9818	8139	8919	31789	7673	39476	30972	29581	7749	10547	30330	38982	9401	7399	8939	11501	42509	28953	8869	10380	4657	24521	34877	30476	6733	9763	1213	23571	28070	29025
368	2639	8396667	47	47_2639	33639	20070	25105	4571	2	2414	86679	87330	148408	3782	3	1470	85278	4024	2	77154	69132	3	2	3	2	3	2	3	2	3	2	2441	30534	3	2	3	2	3	2	3	2	3	2
369	2692	8485000	47	47_2692	3	2	3	10447	4865	5825	2	3	11343	13164	6123	7059	2	5205	15658	3	2	5829	12991	5405	10428	3	5260	6501	9318	13453	4283	10729	2	4340	6121	8832	4425	3	5901	3381	4613	10123	4134
370	2761	8600000	47	47_2761	2	10876	9897	16160	14697	8167	14339	10815	17754	11043	13123	15061	15962	7779	20878	14207	13563	4714	13979	13590	19067	12089	1247	12657	6546	20830	12248	6018	15543	17268	9904	15883	12069	8810	8678	12129	8943	12630	12030
371	2793	8653334	47	47_2793	3	770	2	964	3	2	3	2	3	1074	2	3	2	3	2	3	2	3	1477	2	3	2	3	2	3	2	3	2	3	1347	2	3	2	3	2	3	2	3	2
372	2827	8710000	47	47_2827	2848	2253	2724	3014	2307	2299	4453	2704	6085	2293	2389	2997	7682	2350	7602	6079	4402	1739	3609	3412	5795	3212	2116	2540	2848	3168	2242	2359	2581	3016	2061	2493	2961	2377	2305	4119	1979	2609	3404
373	2859	8763333	47	47_2859	3	2	1249	3	608	2	1864	3	2276	2	3	753	2388	2	3	2	3	2	622	3	2	538	3	2	964	2980	1824	3	2	3	1404	1778	2	817	3	2	1454	3	1946
374	2908	8845000	47	47_2908	2	3	2	1547	3	2	3	2	3	1137	2	3	893	2	3	2	3	2	528	3	2	3	2	3	2	3	2	3	2	3	2	3	2	3	2	3	2	3	2
375	2959	8930000	47	47_2959	960	1574	1699	2636	2158	2573	2327	2023	656	2784	1575	3	3013	2045	771	2749	2681	1344	813	3202	3542	1226	2103	970	1617	5153	3027	3005	1825	980	2611	3424	3172	1556	2528	455	2235	3201	2797
376	3011	9016666	47	47_3011	635	622	399	618	641	883	2094	2019	3370	840	2	3	3688	934	714	1929	1811	2	1007	2543	1556	1112	1274	1301	1096	570	3	1758	2	1199	3	578	2	1191	1906	2742	603	724	3
377	3092	9151667	47	47_3092	2162	1416	1225	1070	1445	1731	5501	5136	5368	2060	1110	1820	1718	1231	2492	2447	3000	686	2418	834	1547	931	1186	1456	788	1447	584	1162	1407	1729	2	783	3	896	1671	1367	2	906	785
378	3129	9213333	47	47_3129	3	2	3	2	3	2	3	2	3	394	2	3	2	3	2	3	2	3	757	2	3	2	3	2	3	2	3	2	3	2	3	2	3	2	3	2	746	3	2
379	3182	9301666	47	47_3182	3	2	3	2	3	2	3	2	3	2	3	2	590	3	2	3	2	1382	3	2	3	2	3	2	3	2	3	2	3	2	3	2	3	2	3	554	2	3	2
380	3184	9305000	47	47_3184	3	2	3	2	1851	3	1152	2	3	1950	2112	1664	1554	2	1809	1288	3	2952	2	2052	3	2	3	2	347	1581	3	2	2866	3742	3	828	2	3	2	1766	3	651	2
381	3230	9381667	47	47_3230	4084	3374	1862	3	2	1610	2844	1662	3804	1848	3	1326	4365	1248	5734	2	3	2	2299	4091	5599	1686	1477	2044	3	6326	4917	1657	3207	2	1940	5758	4823	3	1241	2	2007	5060	4963
382	3269	9446667	47	47_3269	5389	5062	4589	3841	4269	3	1562	1426	3100	4701	5268	4988	3094	4768	7761	3721	3174	4232	7763	6394	8476	6219	6992	6402	2988	9005	7841	5893	5224	2	4720	9183	7791	4870	8564	3	5584	7654	8589
383	3318	9528334	47	47_3318	3428	1784	1733	2616	1799	4377	12381	13060	25245	2466	2	3	5871	1492	2695	4084	3525	1159	1927	1905	2639	1054	808	1560	2456	3835	1397	1043	1880	2	1287	2048	1017	1160	1305	1179	933	2507	1881
384	3364	9605000	47	47_3364	16958	13738	13994	28186	18175	22406	31292	25195	41507	30392	20259	22563	37369	4384	40441	29863	30712	1866	9954	24862	34904	2257	4477	3700	16183	27838	4740	4778	12403	12710	6890	19333	5213	2437	3750	6558	3408	18767	3979
385	3413	9686666	47	47_3413	3	7585	7366	2	2358	2868	3	2	8081	3	2303	2	8500	3	10621	5707	7516	2	2505	8925	11896	3	2994	2	4824	10860	6989	3	1672	1637	4846	9749	5773	2996	2	3	5299	6671	2
386	3458	9761666	47	47_3458	3	2	3	3228	2	3	7903	6740	2	3706	3	2	3	2	3	2	3	2991	2	3	2	3	2	3	2	3	2	3	2	3	2	3	2	3	2	3	2	3	2
387	3503	9836667	47	47_3503	3811	3543	3	1184	2	1503	1588	1537	648	1469	3	2938	853	2312	2	1335	3	1765	2	3	2	2821	2202	2723	3	2	3	2893	2	3	2	3	2	3	3673	2	3	2	3
388	3587	9976666	47	47_3587	5261	3880	3047	2167	2657	3497	740	2	640	3240	1831	3096	2426	3625	2108	2517	1385	2672	4857	1560	2796	4435	3568	899	4206	3062	2065	1380	2940	2534	2485	3084	2574	4007	1106	1384	13215	2552	2319
389	3627	10043333	47	47_3627	2939	1341	886	13099	2783	3	529	2	3	3232	1179	2	1047	613	3	606	2	3	2	3	2	3	2	3	2	3	2	3	2816	3403	2	3	2	3	2	3	2	3	2
390	3721	10200000	47	47_3721	2097	937	2328	714	394	1161	1248	3	2420	733	1048	852	2445	901	3117	1499	1775	2629	886	2361	2670	897	961	876	1852	3956	2145	727	1080	1277	2125	3015	1938	1016	1519	1572	1846	2412	2807
391	3772	10285000	47	47_3772	2475	1109	1518	1698	632	2737	3174	6539	9908	2	993	1297	16029	3	19925	10432	13062	2	1109	11954	15819	308	3	2	3	2	3	2	284	1043	3	1407	2	3	424	1141	2	3	2
392	3812	10351666	47	47_3812	3	2	3	2	3	2	6338	2848	12043	3	2	3	2	3	2	3	2	3	2	3	2	3	2	3	2	3	2	3	2	3	2	3	2	3	2	3	2	3	2
393	3810	10348333	47	47_3810	6274	5030	4904	3096	8300	8637	45040	42800	76475	14950	3030	7695	9278	2453	16227	12845	3	7526	2764	13426	16258	2772	2853	2781	1157	17926	13039	10740	9935	9662	10083	15621	12454	6725	2758	2528	10667	11045	13615
394	3930	10548333	47	47_3930	2433	1129	1109	4624	3157	1880	2087	1100	4539	1895	887	1396	2	1764	2961	1916	3	704	1234	2726	2616	1076	1683	1979	1235	2236	998	1699	2	1113	1839	1677	2098	1597	1392	1837	767	3	2583
395	3978	10628333	47	47_3978	4185	2589	3247	3361	2157	2744	2537	2069	5445	3679	1423	2355	4068	2158	6265	3094	3506	2111	2	5280	5824	3	2105	1841	1628	5940	4118	2729	1928	2018	3009	4544	3837	1554	2	2472	3070	3634	4613
396	4008	10678333	47	47_4008	1741	3	2	1800	1519	1267	3100	3	2	2613	1546	2413	3	1641	5167	2	3031	1823	2692	3940	3	2272	2216	2267	1102	4731	3362	2	1488	967	2182	3796	3084	1460	2505	461	1491	2836	3553
397	4100	10831667	47	47_4100	13311	11779	13243	5866	7323	6972	4602	4499	5090	7993	8335	7763	6882	8032	11323	6591	6018	6801	9867	10945	10599	7385	8622	8575	5336	12886	10444	6688	10762	7922	21062	10372	8151	4718	7563	5084	8504	5587	8025
398	4138	10895000	47	47_4138	1022	3	2	3	2	3	2	3	677	342	2	3	761	440	2	3	2	3	2	3	1101	2	3	2	3	2	872	329	277	3	2	951	819	3	2	3	732	338	706
399	4224	11038333	47	47_4224	2662	2134	2492	3311	1659	1949	2321	1904	3057	1009	1702	1589	3025	1535	4845	2736	2123	1925	2091	3244	5451	1651	1519	1917	1482	6223	3588	1246	1416	1178	3737	2783	4319	1444	2251	1403	3732	3490	1731
400	4233	11053333	47	47_4233	2	3	2	1212	1640	1812	3	2	3	1989	2099	2	3	2155	2	3	2	3	2016	2	3	1776	1989	2	1885	625	3	2035	2175	2149	2	3	2	1512	3	2724	2	3	2
401	4287	11143333	47	47_4287	1021	570	571	1064	3	2	628	3	2867	2	3	231	2200	380	2100	592	542	2	489	1273	1987	260	3	2	421	2392	1980	3	511	858	598	2018	1149	2	3	2	3	967	2031
402	4326	11208333	47	47_4326	2	3	2	526	3	2	3	2	2345	3	2	3	2069	2	3	2	3	2	3	2	3	2	3	2	3	2	3	2	218	3	2	3	2	3	2	3	2	3	2
403	4377	11293333	47	47_4377	350	439	3	1368	2	3	2	3	753	577	2	612	657	572	757	676	3	2	576	945	1363	3	2	666	3	1270	1255	1126	2	3	2	1625	981	3	618	670	978	364	1332
404	4417	11360000	47	47_4417	2	3	2	3	2	3	2	3	2	3	2	3	2	3	2	3	2	3	2	3	801	2	3	2	3	823	668	429	2	3	2	647	3	2	3	2	3	2	3
405	4455	11423333	47	47_4455	5566	5292	5000	2802	2128	2134	3752	3451	5992	2685	2108	2177	7005	2507	13270	6276	5989	2191	3411	10932	15016	2733	2975	3070	4167	17861	12497	3161	2634	2051	12010	16026	11868	2170	3285	3483	13293	11992	13810
406	4512	11518333	47	47_4512	2	3	2	771	3	2	3	2	327	615	3	563	2	3	2079	2	3	2	915	1676	3023	317	3	2	572	4168	2108	3	1178	2	2434	3942	1980	3	2	3	2526	2467	2856
407	4541	11566667	47	47_4541	7543	5770	5518	4199	2811	3597	2125	1703	4000	6843	4932	5540	1134	6129	7785	2018	2390	6844	8973	5346	9285	6744	7170	6349	2599	11865	6846	8989	4483	4249	6487	9353	7172	5024	8478	7150	6368	7889	7826
408	4587	11643333	47	47_4587	932	799	2	2837	2294	864	3	2	996	763	580	1190	3	2	1688	3	2	3	889	2	2054	1372	711	825	715	1528	3	2	1092	867	3	2	1166	3	2	3	2	375	722
409	4630	11715000	47	47_4630	798	3	2	810	1239	3	2	3	2	422	3	511	689	2	3	2	744	3	2	1218	3	661	2	3	2	2336	1424	823	352	801	971	1705	3	790	535	542	1254	1494	1863
410	4675	11790000	47	47_4675	3378	2678	2699	2193	1166	1712	5799	4767	5234	3010	2549	2205	3939	2294	7662	3551	3491	5877	4083	6010	7409	3550	3032	3146	2156	7836	4668	4540	2075	2511	4287	6276	4331	2375	3544	3623	4608	5098	5216
411	4712	11851666	47	47_4712	593	443	2	3	2	3	3520	2	3	2	3	2	3	2	1801	3	2	3	2	1446	1541	3	2	3	2	2000	3	2	3	2	3	1417	2	3	2	3	1197	1376	2
412	4749	11913333	47	47_4749	3339	2897	2740	2104	2141	2406	5072	3452	4128	2389	2679	2545	4187	2194	5154	3831	4199	3234	2191	4418	4895	2000	2204	2330	2698	5355	3509	2447	2389	3313	4307	4383	3752	2164	2383	3171	4282	4193	4104
413	4789	11980000	47	47_4789	566	3	2	3	2	3	1133	1051	1189	2	3	2	1183	3	2	948	957	3	2	3	2	3	2	3	2	356	3	2	3	2	3	2	3	2	3	528	2	3	2
414	4819	12030000	47	47_4819	1185	399	3	3822	2	3	461	2	3	4833	2	3	2	3	2	3	2	2510	3	512	2	3	2	1620	3	1366	358	3705	2	3	722	1015	523	2	3	1652	2	427	927
415	4864	12105000	47	47_4864	13677	11525	14316	9274	6330	8124	21012	7698	9744	11635	5627	6431	10081	5990	17865	9993	11472	6304	8990	12462	9868	5392	5567	3997	1246	11919	6099	10762	9814	6638	5955	7747	5851	5109	7250	1212	6395	5971	6560
416	4974	12288333	47	47_4974	3	2	3	2	3	2	3	2	3	433	2	3	2	3	2	3	2	3	2	3	4019	2	3	2	1706	3	2181	1847	2	3	3532	5095	2	3	2	3	3784	2814	4208
417	4951	12250000	47	47_4951	17669	16176	17476	16680	14150	15332	9132	3474	8470	1626	2	828	15267	1168	13173	14741	17833	3	1331	12684	9827	641	1107	1130	3445	10539	8376	1393	4383	3877	8974	11321	9102	2	1092	3	9890	8410	10272
418	5037	12393333	47	47_5037	2	3	2	19281	16639	3	2	3	12852	2	3	2	3	2	3	2	3	2	3	39093	2	3	2	3	2	5644	3	2	5315	4278	3	2	3	2	3	2	3	2	3
419	5037	12393333	47	47_5037	39256	35943	37337	49258	39198	48114	35780	28676	38920	4238	1646	2203	41198	5835	40084	39459	40419	7387	1607	34587	13038	4158	4477	5221	6327	5296	8140	3462	36350	34616	4212	2217	6385	3338	2896	6816	5906	6138	8471
420	5089	12480000	47	47_5089	33633	34493	2	3	2	3	2	3	2	1766	1776	1111	3	1127	17537	2	3	2	2018	3	2638	241	2	1267	1451	3	665	496	35196	2	1046	3	1774	637	1311	2905	767	1601	853
421	5136	12558333	47	47_5136	33424	30115	32582	42575	38506	37199	35872	30847	24529	3121	1360	2181	35897	2851	48687	45265	46320	1374	1363	29027	7683	700	844	920	3376	3408	1920	909	33178	36452	1460	1658	1496	541	959	2086	1239	4143	1322
422	5151	12583333	47	47_5151	2	3	2	40211	33439	34423	3	2	4262	1558	3	808	2	3	8216	2	3	2	1000	3	1462	2	3	674	1400	1956	1021	636	2	6256	1028	3	932	2	679	1835	3	2113	762
423	5223	12703333	47	47_5223	2	3	2	3	2	3	23275	15083	39601	2	3	2	37314	3	2	30190	32535	11460	3	2	3	2	3	2	3	2	3	2	3	498	2	1294	3	2	3	2	974	283	3
424	5291	12816667	47	47_5291	2	587	3494	5531	2263	3	2	3	10315	287	2	378	14785	3	1601	11486	13378	613	507	2655	1337	537	2	354	547	1397	818	458	3	2	3	450	656	2	3	433	476	516	548
425	5356	12925000	47	47_5356	830	791	1839	3817	1084	3413	2	3	5796	838	2	692	3	357	519	2	11247	3	633	824	657	2	3	2	3	797	630	552	985	858	2	3	2	3	2	3	2	3	355
426	5363	12936666	47	47_5363	2	3	2	3	2	730	3	2	3	2	3	387	2336	2	3	2	9289	3	2	3	462	2	3	2	3	2	3	566	2	3	2	3	2	3	2	3	2	3	2
427	5467	13110000	47	47_5467	1250	1074	1191	3	1067	578	1679	2	506	829	1292	957	3	894	1088	2	6451	1292	939	1343	1319	773	869	836	1409	1170	918	1267	1201	1699	1429	1189	1508	910	688	1016	1256	845	1533
428	5525	13206667	47	47_5525	17689	15061	16224	22003	20040	20459	20049	15271	16218	19185	18433	16775	14978	15303	22227	15841	22895	34270	15830	17264	16684	14870	15676	15686	22687	21260	15246	17524	19566	19940	19278	17397	19173	14439	13509	19236	17410	18194	17066
429	5562	13268333	47	47_5562	3	801	2	6148	5558	6384	3	2	3	2	3	439	2	3	2	3	2	3	2	3	2	3	458	2	3	2	3	2	2295	1725	3	2	3	2	3	2	3	2	3
430	5643	13403334	47	47_5643	437	2	3	2	3	2	1093	1070	3	2	3	2	3	2	3	709	861	2	3	451	627	2	3	2	3	503	423	2	3	2	3	254	2	3	2	3	352	351	2
431	5715	13523334	47	47_5715	2621	2125	2439	1395	2171	2149	6821	6311	6660	2045	1147	1794	7155	1836	9519	6805	6987	1772	2040	7764	1441	1282	1539	1081	2734	10565	767	1401	1810	897	7371	9391	3	1207	1151	541	8657	6838	874
432	5719	13530000	47	47_5719	2	1046	923	3	2	3	2	3	2136	2	3	2	3	2	3	2	3	2	3	481	2	3	2	3	2	3	2	3	2	3	2	3	2	3	2	3	2	3	1311
433	5778	13628333	47	47_5778	2	3	2	3	2	3	2	3	2	3	2	910	3	1587	2	3	2	1492	1983	3	2	592	988	821	3	1836	2	3	2	3	2	3	2	3	2	3	2	3	354
434	5821	13700000	47	47_5821	1500	1219	1068	997	702	1042	1072	2	1413	1562	3	1333	1176	1586	4173	1974	2074	1441	2317	2689	2938	426	869	575	1065	3532	1749	1422	1832	1956	1366	1645	579	2	540	1040	598	830	1040
435	5987	13976666	47	47_5987	647	3	2	3	365	2	3	2	659	3	2	3	574	2	466	3	2	3	2	3	2	3	2	3	324	2	3	2	3	2	3	2	3	2	3	2	3	2	3
436	6032	14051666	47	47_6032	2	1010	3	2	3	2	1179	924	1338	3	2	251	1295	3	2	2226	1739	3	2	3	2	3	2	3	2	3	2	3	694	2	3	2	3	2	3	2	3	2	3
437	6153	14253333	47	47_6153	8140	6396	6863	8714	5488	7451	5367	5610	8411	9079	4337	6046	10313	7525	9887	5175	6707	9810	8051	7718	7906	5396	6180	6171	9248	8698	6573	9324	6494	6113	6008	8208	4781	6534	6270	8666	7263	5734	10608
438	6183	14303333	47	47_6183	2	3	2	3	2	946	460	3	2	3	610	664	2	3	1187	2	3	2	561	3	2	478	3	355	2	3	2	3	2	902	3	2	342	3	2	782	3	414	1144
439	6237	14393333	47	47_6237	5701	3952	4795	9191	5786	6975	6588	5469	7052	7332	5488	5085	3541	4662	6898	6152	1458	10238	5359	4827	5280	4633	4739	4888	6875	6366	4606	7118	5961	6066	5457	5571	5330	4408	4302	6784	4707	4624	4963
440	6311	14516666	47	47_6311	2	3	2	3	2	3	2	3	2	519	3	2	480	3	2	3	2	3	2	3	2	3	2	3	2	230	3	479	2	3	2	304	3	2	3	2	3	2	3
441	6355	14590000	47	47_6355	2	3	2	3	2	3	2	3	2	3	2	3	2	365	3	2	3	2	3	2	3	2	3	2	584	525	3	2	3	2	3	2	3	2	3	2	3	2	3
442	6402	14668333	47	47_6402	396	407	2	2744	1725	823	813	3	2055	2333	2	628	1631	1824	1437	3	2	600	377	3	714	2	3	587	2	538	3	1810	399	2	3	235	2	3	503	990	2	3	1185
443	6452	14751667	47	47_6452	2	3	2	3	2	3	1350	2	3	2	3	199	2	3	2	3	2	3	2	3	2	3	2	3	2	321	3	2	3	2	3	2	3	2	3	2	3	2	3
444	6571	14950000	47	47_6571	2	783	964	740	901	754	1242	3	971	281	915	636	755	590	2	861	1111	1923	3	2	3	847	732	687	2	3	1057	2	1021	1084	1081	356	875	3	607	2	830	790	641
445	6656	15091666	47	47_6656	3	2	3	2	3	2	1735	1189	1826	3	2	3	546	2	3	782	656	2	3	2	3	2	3	2	3	2	3	2	3	2	3	2	3	2	3	2	3	2	3
446	6709	15180000	47	47_6709	2	3	2	1065	3	2	3	2	3	427	2	343	3	2	3	2	3	2	3	2	3	2	3	2	3	2	3	2	3	2	3	2	3	2	3	2	3	2	3
447	6789	15313334	47	47_6789	848	2	751	860	400	586	530	3	499	672	2	532	1160	628	1090	553	3	711	675	561	693	387	2	632	934	751	3	906	502	2	3	584	2	3	481	771	855	621	982
448	6837	15393333	47	47_6837	368	2	3	3792	2	1035	3	2	3741	1754	3	2	2349	3	786	2	1032	834	429	3	467	2	3	2	627	937	3	2466	2	3	2	468	397	3	2	912	3	220	926
449	6941	15566667	47	47_6941	1255	998	1350	2	3	2	3	2	3	2	3	2	3	2	1064	540	607	3	2	635	792	3	2	295	3	505	649	2	3	2	3	760	780	2	3	2	857	704	990
450	7005	15673333	47	47_7005	1734	1308	1145	2423	1196	2195	903	1534	2041	1753	762	1084	1971	1409	2066	1005	1456	1444	1573	1591	1426	952	1130	1107	1887	1690	1152	2367	1264	916	1135	1415	950	1173	1157	1856	1527	1197	2289
451	7269	16113333	47	47_7269	3542	2679	3462	1151	792	1098	8671	5963	6848	1112	3	870	8087	944	9835	8213	9825	1255	997	8114	6657	809	767	949	2645	9139	6633	1288	802	876	7704	7743	6964	720	731	1311	8262	6470	6537
452	7312	16184999	47	47_7312	2	3	2	3	2	3	924	2	3	2	3	2	3	2	3	2	3	986	2	3	2	3	2	3	2	3	2	3	2	3	2	3	2	3	2	3	2	3	627
453	7372	16285000	47	47_7372	1009	409	864	2016	468	1084	1316	990	1743	1208	2	525	1606	651	3320	2037	2407	2807	926	2600	2332	295	3	384	937	4025	2161	1339	597	2	2410	2541	2263	3	2	713	3167	1661	2502
454	7375	16290001	47	47_7375	3	361	549	2	3	2	3	2	3	2	3	2	3	2	3	2	3	2	3	2	1110	3	2	3	2	689	3	2	3	2	3	2	3	2	3	2	3	2	3
455	7522	16535000	47	47_7522	2	3	2	3	2	3	2	3	476	2	3	2	3	2	3	626	2	3	2	3	2	3	2	3	2	3	2	3	2	3	2	3	2	3	2	3	2	3	266
456	7939	17230000	47	47_7939	707	2	3	1399	2	3	2	3	1148	872	2	313	961	345	621	3	636	2	367	3	329	2	3	2	507	525	3	1117	359	2	3	401	2	3	2	509	3	2	715
457	7977	17293333	47	47_7977	6468	4490	7756	8018	4740	7168	23191	21129	32350	2373	1525	427	22956	3	15073	21469	25357	2	3	6688	2	3	2	3	2	398	3	2	5511	3	2	3	2	3	2	3	2	3	2
458	8122	17535000	47	47_8122	3	2	3	2	3	2	1487	3	291	2	3	172	2	3	2	3	2	3	301	2	3	2	3	2	3	2	3	2	3	2	3	2	3	2	3	2	3	2	3
459	8557	18260000	47	47_8557	2	3	2	3	2	3	2	3	2	3	2	3	2	3	2	3	2	3	326	2	3	386	2	3	2	3	2	602	3	2	3	2	3	2	3	2	3	2	3
460	44	4071667	48	48_ 44	12084	9597	15042	18099	20330	18573	14989	20311	18617	18756	12950	17576	25385	15749	16686	19336	16786	7692	19493	15992	18470	20406	19703	18003	19235	16264	18299	16207	15136	14268	12708	18391	15338	18020	20174	20202	14111	17140	18519
461	92	4151667	48	48_ 92	8030	6143	10202	2	3	2	14236	20306	19576	3	9981	13860	19072	2	15107	17171	15259	3	2	12443	3	2	3	2	3	2	3	2	12443	12140	3	2	3	2	3	2	3	2	3
462	137	4226666	48	48_ 137	15662	12206	18019	8532	16460	15523	13260	16365	13121	12880	17578	17427	18753	17573	16040	18711	19781	15602	21160	16670	22283	25906	23513	24794	18938	23125	31916	21536	17671	23053	26379	29995	34062	24217	24164	27539	31627	32608	36082
463	198	4328333	48	48_ 198	3043	2	3	2	3	2	3	2	3	2	3	2	3	6381	2	3	2	1664	3	6796	9741	10428	2	3	2	3	2	3075	6127	8121	5115	3	2	7634	3	2	6497	3	2
464	269	4446667	48	48_ 269	3831	1945	4568	4570	11717	9677	3908	6019	7985	6297	7546	8606	10777	6414	6717	7423	8147	4772	7300	9794	11153	10853	8031	10547	10240	3823	4099	6731	8963	9643	8103	3771	5088	9379	7424	9944	9706	7746	8758
465	308	4511667	48	48_ 308	3	235	916	394	6166	5254	1695	2247	2249	2551	2634	5149	6206	4552	1929	2755	5005	837	3099	5585	7617	7059	3827	6777	7186	856	616	2088	4440	5557	3567	929	2135	5723	3798	5921	5376	4031	3747
466	360	4598333	48	48_ 360	2	3	2	277	3	2514	2	3	594	1024	343	2617	4653	2142	2	317	1560	3	2	3938	5741	3162	776	3	5287	220	2	3	2	3894	1229	392	3	3789	883	3538	3067	2	3
467	390	4648334	48	48_ 390	2	3	2	3	2	3	2	3	2	3	2	1316	3270	3	2	3	419	2	3	2	4940	3	2	2900	4361	3	172	435	707	2769	2	482	3	1776	2	3	1810	2	200
468	440	4731667	48	48_ 440	3	2	3	438	1072	2	3	2	3	268	2	467	3	899	2	3	2	3	284	1808	4153	1261	2	3	2	224	3	2	3	1644	2	3	2	3	264	2	3	2	3
469	500	4831666	48	48_ 500	2	3	2	3	2	3	2	3	2	3	2	207	1420	3	2	3	2	3	2	1158	3269	3	288	1079	1927	2	164	3	2	3	2	302	3	2	3	2	889	3	2
470	556	4925000	48	48_ 556	3	239	674	2	3	2	317	3	2	249	3	2	3	780	2	576	3	2	3	401	3356	2	3	2	3	2	3	2	3	1327	2	3	2	3	187	2	3	2	3
471	554	4921667	48	48_ 554	1090	779	1497	782	1519	929	668	494	483	182	594	381	809	533	547	477	378	2	3	594	2379	2	3	424	2	555	606	3	976	7986	2	387	3	2	330	3	892	329	249
472	605	5006667	48	48_ 605	524	2	3	2	3	2	3	552	657	2	3	2	3	2	590	3	843	2	3	2	3	2	294	3	2	634	626	3	2	3	2	550	3	2	361	3	2	3	2
473	678	5128334	48	48_ 678	3	232	504	195	1166	569	440	2	177	373	470	916	3	1276	858	660	1171	2	576	3	2	691	1163	812	3	1102	773	2	3	696	721	978	764	2	3	567	700	1264	2
474	715	5190000	48	48_ 715	10325	8416	10316	13766	11486	10241	15204	12889	16610	6911	7545	3931	6848	5423	8285	9029	10151	5537	6551	9209	6980	4903	4448	6302	4933	7035	6828	3363	13691	8854	8205	7090	7729	2906	3958	3541	6285	7976	5341
475	797	5326667	48	48_ 797	3	469	2	168	959	1319	3	391	2	174	3	490	2	3	2	401	1072	3	281	2	3	1231	920	844	576	706	577	254	2	630	476	372	831	3	2	3	779	1266	2
476	814	5355000	48	48_ 814	3	278	2	3	2	3	2	3	2	3	2	3	2	3	2	3	2	3	2	3	2	604	429	3	2	3	2	3	2	3	2	3	2	3	2	3	2	3	2
477	882	5468333	48	48_ 882	1795	2228	1816	3	2	253	6573	5302	3171	3	2	3	2633	2	600	3580	2425	3	593	392	2	3	2	3	2	586	283	3	2682	2588	2	3	2	3	2	3	184	477	423
478	980	5631667	48	48_ 980	2142	1577	2305	1204	710	511	4863	5043	9919	731	815	603	4019	583	1764	4125	3753	832	1053	1428	1124	622	555	345	662	1051	919	489	4107	2778	1173	805	1029	448	409	526	818	1464	757
479	1063	5770000	48	48_1063	2	3	2	3	2	3	2	3	2	3	2	300	3	2	3	2	3	2	3	2	3	2	363	3	2	3	451	2	3	2	3	2	3	2	3	2	3	2	346
480	1079	5796667	48	48_1079	3	254	2	184	476	160	697	3	410	2	475	187	241	286	3	421	386	404	385	293	2	439	272	3	2	271	281	390	522	406	3	265	2	3	367	2	471	3	353
481	1118	5861667	48	48_1118	2	347	3	2	3	2	3	2	3	2	3	312	2	3	2	3	2	3	2	3	2	3	2	3	2	3	2	3	2	281	3	2	3	2	3	2	209	3	2
482	1169	5946667	48	48_1169	3	181	2	3	255	2	537	315	526	170	3	2	3	2	3	262	168	2	3	2	3	2	225	3	2	313	284	3	336	651	326	2	3	2	3	2	3	435	2
483	1218	6028333	48	48_1218	569	311	809	534	699	238	1344	1071	1349	336	501	574	1185	3	1474	1163	1425	660	871	1201	1799	709	592	870	1416	1206	869	587	407	494	731	1133	888	724	543	528	851	1440	979
484	1257	6093333	48	48_1257	2	3	2	3	2	156	3	2	111	225	3	2	274	3	2	3	2	3	2	3	2	3	2	3	2	313	255	3	2	3	2	3	2	3	2	3	2	344	234
485	1296	6158333	48	48_1296	792	892	670	293	760	450	3467	3179	1817	452	3	2	599	625	311	703	538	3	293	665	865	2	606	3	655	489	700	491	1212	1186	907	573	898	780	778	798	280	434	1024
486	1333	6220000	48	48_1333	707	833	848	485	2	632	562	546	325	336	612	735	3	2	983	658	641	3	493	2	3	1040	2	899	3	866	2	3	891	1160	2	3	2	3	162	2	458	754	3
487	1421	6366667	48	48_1421	6097	5334	5246	29681	19826	13102	4953	3704	3096	14702	11182	10415	2631	263	4090	3279	3304	599	897	2002	4198	2	349	1215	1795	4580	3178	3	19928	19996	2198	3400	3742	2	729	3	1183	2062	3093
488	1457	6426667	48	48_1457	2	431	740	304	235	569	3	2	3	282	707	795	2	3	2	3	2	3	2	3	2	3	271	2	3	2	3	2	1031	927	3	2	3	2	3	2	3	2	3
489	1572	6618333	48	48_1572	2	283	3	2	238	544	3	2	429	366	3	2	409	3	2	3	351	2	3	262	2	3	201	2	3	266	211	2	3	2	522	189	3	2	298	3	502	2	3
490	1627	6710000	48	48_1627	2	3	2	3	2	3	2	3	2	3	2	3	2	3	1184	2	3	2	3	878	1040	2	3	2	3	1456	164	2	3	2	913	1188	3	2	3	2	583	915	3
491	1670	6781667	48	48_1670	1444	933	1078	763	743	685	4458	4499	7349	813	968	827	2968	461	508	3458	3011	728	1160	433	2	921	648	884	879	795	765	652	2779	1097	1299	419	954	738	632	927	1846	1010	874
492	1636	6725000	48	48_1636	842	1302	2003	3	2	3	1851	2	3	163	2	3	1141	2	3	1314	1387	2	538	3	2	3	184	2	405	445	609	470	1257	1987	386	857	1078	3	262	2	3	1176	1544
493	1740	6898334	48	48_1740	2	3	2	3	2	3	2	3	2	3	265	2	3	2	3	139	2	3	2	3	2	3	2	3	2	3	2	3	2	3	622	2	3	2	3	2	487	3	558
494	1779	6963333	48	48_1779	931	954	1008	246	182	277	280	2	329	326	627	379	319	552	809	557	435	657	1054	360	736	1200	978	1106	780	2039	2631	1731	734	1138	2158	2740	4037	1179	1475	2450	2956	3246	4376
495	1854	7088333	48	48_1854	420	412	542	560	540	409	277	516	271	335	611	537	433	432	730	571	557	3	628	384	605	576	467	583	817	699	548	2	918	499	378	524	691	418	485	632	456	595	633
496	1935	7223333	48	48_1935	1468	338	1583	515	521	1111	748	1258	1703	411	897	1011	3040	632	6668	3589	3538	680	1440	3496	6854	1427	1130	922	3504	9150	3214	1281	3	736	3954	8296	4325	1028	1132	1372	3217	4965	3598
497	1994	7321667	48	48_1994	680	825	1075	372	232	350	3074	3622	5816	555	2	213	2000	3	1392	2597	2467	2	733	691	1783	3	281	448	2	1317	900	570	1576	848	3	1115	2	3	239	734	302	776	412
498	2042	7401667	48	48_2042	2	3	2	3	2	3	2	3	252	2	3	2	3	2	228	3	2	3	2	3	254	2	3	2	3	2	101	3	2	3	2	189	3	2	3	2	3	2	3
499	2147	7576667	48	48_2147	6292	4929	6720	5072	4019	4202	4471	4555	6729	4858	3629	2	4015	1823	2726	4684	4457	941	1741	1794	2397	1462	1585	2422	1914	2659	2019	1465	5083	2627	4552	2389	2508	948	1492	2236	2766	3683	1893
500	2181	7633333	48	48_2181	4435	4510	5221	3	4924	4176	3343	3385	4249	4038	4737	4913	3714	3521	5009	4811	4982	3390	4728	4113	4827	4756	4152	4903	4163	4480	4419	3789	5939	2	3852	4495	4461	4084	3959	4510	3761	4334	4649
501	2277	7793334	48	48_2277	827	1035	1167	346	395	391	1157	1061	1161	428	619	603	950	437	1816	1756	1395	407	753	1740	1720	424	533	507	788	1824	1740	421	479	598	1663	1888	1968	482	616	461	1660	1854	1759
502	2329	7880000	48	48_2329	430	326	380	378	572	511	711	712	301	259	324	338	288	428	764	679	696	3	379	758	731	380	353	436	539	569	564	367	2	294	3	616	567	650	351	351	427	752	469
503	2368	7945000	48	48_2368	2	313	3	186	249	237	734	497	592	273	2	337	3	2	478	429	564	3	416	407	474	2	385	298	490	451	3	2	3	337	2	419	516	362	279	465	287	636	330
504	2413	8020000	48	48_2413	3	209	2	3	276	2	3	2	3	165	2	3	2	3	2	3	2	3	2	3	2	3	2	3	2	3	2	3	2	329	3	2	3	2	3	2	3	2	3
505	2490	8148334	48	48_2490	2	122	3	158	437	207	918	1164	968	2	3	2	3	2	3	334	2	3	2	3	2	3	196	2	3	2	149	3	1143	283	2	3	2	3	2	3	2	3	2
506	2599	8330000	48	48_2599	699	628	572	280	237	244	1020	1037	1430	373	3	2	1184	3	1559	1241	1137	2	3	1203	1495	2	322	3	477	1654	1100	2	420	3	998	1261	1392	2	386	3	956	1082	1210
507	2640	8398334	48	48_2640	1125	665	813	207	2	3	2972	3390	5887	133	2	356	3120	3	359	2815	2628	2	348	3	2	3	2	3	2	173	3	2	1236	235	3	2	3	2	3	2	3	2	3
508	2692	8485000	48	48_2692	2	326	3	395	2	3	2	3	350	596	2	3	2	3	726	2	3	2	449	3	348	2	3	2	3	482	2	372	3	2	3	334	2	3	249	2	3	321	2
509	2761	8600000	48	48_2761	3	486	478	649	784	318	556	643	664	466	617	695	527	385	919	627	632	2	716	581	817	632	349	591	3	894	480	2	626	901	3	779	2	425	262	570	432	483	560
510	2829	8713333	48	48_2829	3	2	3	2	3	2	3	2	378	3	2	3	612	2	265	431	354	3	2	3	2	3	2	3	2	3	2	3	2	3	2	3	2	3	2	3	2	3	2
511	3270	9448334	48	48_3270	3	2	3	2	3	2	3	2	3	2	3	2	3	2	3	2	3	2	3	2	3	2	208	3	2	3	238	2	3	2	3	256	2	3	260	2	170	3	222
512	3321	9533334	48	48_3321	2	3	2	176	3	2	1884	1932	3879	163	3	2	663	3	2	3	536	2	3	2	3	2	3	2	3	540	2	3	2	3	2	3	2	3	2	3	2	321	3
513	3365	9606667	48	48_3365	488	451	571	1046	640	1009	1337	1097	1931	1073	779	760	1193	2	1400	1235	1229	3	359	810	1101	2	3	2	747	983	3	2	410	445	3	626	2	3	2	3	2	645	3
514	3411	9683333	48	48_3411	2	185	3	2	3	2	3	2	374	3	2	3	2	3	250	2	3	2	3	2	3	2	3	2	3	241	180	2	3	2	3	264	2	3	2	3	2	3	2
515	3588	9978333	48	48_3588	3	2	3	553	2	149	3	2	3	2	3	2	3	2	3	2	3	2	3	2	3	2	3	2	3	900	315	2	3	2	494	531	385	3	2	3	533	557	402
516	3792	10318334	48	48_3792	2	3	2	3	2	3	2	3	1016	2	3	2	3	2	771	409	378	3	2	296	538	3	2	3	2	3	2	3	2	3	2	3	2	3	2	3	2	3	445
517	3850	10415000	48	48_3850	2	3	2	209	243	218	1714	1542	2817	436	3	254	576	2	555	386	294	3	366	512	553	2	350	3	2	556	580	3	2	245	364	582	3	2	3	2	419	3	2
518	4098	10828333	48	48_4098	3	303	524	159	280	215	2	3	88	189	2	336	3	344	462	277	233	2	442	323	3	2	418	3	2	483	301	3	435	205	688	412	2	3	255	2	381	3	301
519	4455	11423333	48	48_4455	2	251	3	2	3	2	3	2	205	3	2	3	309	2	512	3	225	2	3	437	574	2	3	2	3	721	529	2	3	2	532	709	496	3	2	3	544	519	609
520	4542	11568334	48	48_4542	2	189	3	2	3	2	3	2	118	143	3	214	2	3	300	2	3	2	3	2	3	2	359	3	2	288	300	313	3	193	2	405	3	2	302	3	296	333	240
521	4676	11791667	48	48_4676	2	3	2	3	2	3	2	3	146	107	2	3	2	3	2	3	2	3	2	3	2	3	2	3	2	261	3	2	3	2	3	2	3	2	3	2	3	2	3
522	4862	12101666	48	48_4862	2	3	508	2	3	2	3	2	3	2	3	2	3	2	3	2	3	2	3	2	3	2	3	2	3	2	181	3	2	3	2	3	2	3	2	3	198	2	3
523	4866	12108334	48	48_4866	494	225	2	310	300	341	805	3	171	507	2	247	3	2	524	3	2	3	2	551	3	2	186	3	2	345	174	384	3	227	2	301	3	2	244	3	318	319	326
524	4953	12253333	48	48_4953	553	520	521	472	489	499	2	3	213	2	3	2	3	2	3	2	602	3	2	275	3	2	3	2	3	2	3	2	3	2	3	277	2	3	2	3	2	3	335
525	5036	12391666	48	48_5036	792	910	1011	1395	896	1225	982	1089	1411	340	2	270	1064	400	3	970	919	2	277	1055	3	2	3	2	3	254	236	2	925	3	2	246	3	2	3	2	229	3	275
526	5071	12450000	48	48_5071	629	2	3	2	3	2	3	2	3	2	3	2	3	2	1122	3	2	3	2	1262	3	2	3	2	3	2	3	2	3	786	2	3	2	3	2	3	2	3	328
527	5163	12603333	48	48_5163	735	1262	1269	1588	607	1208	2864	2988	3814	2	3	2	3187	3	1155	3114	2897	2	3	917	2	3	2	3	2	3	2	3	1257	591	2	3	2	3	2	3	2	3	2
528	5151	12583333	48	48_5151	3	470	790	889	2	592	3	2	84	3	2	3	2	3	2	3	2	3	2	3	2	3	2	3	2	3	2	3	623	2	3	2	3	2	3	2	3	2	3
529	5211	12683333	48	48_5211	2	3	2	804	873	646	1050	1229	1790	3	2	3	1351	2	3	781	1149	2	3	2	3	2	3	2	3	2	3	2	3	2	3	2	3	2	3	2	3	2	3
530	5525	13206667	48	48_5525	758	722	763	1138	979	958	907	739	735	936	827	789	631	636	1064	743	962	1555	723	792	831	723	740	771	1128	923	740	777	836	934	939	885	993	712	566	983	760	866	813
531	5703	13503333	48	48_5703	2	3	2	373	384	247	3	2	133	343	3	275	2	3	461	2	3	2	3	338	2	3	217	2	3	480	234	263	2	3	2	446	3	2	303	3	386	2	484
532	6153	14253333	48	48_6153	352	302	3	384	262	344	336	2	306	396	3	295	313	370	401	2	275	3	2	337	3	2	322	3	2	357	352	370	3	241	350	361	2	3	257	2	320	3	457
533	6191	14316667	48	48_6191	2	3	2	242	3	171	2	3	2	168	3	2	3	2	3	2	261	3	2	3	2	3	2	3	2	3	2	3	2	3	2	3	2	3	2	3	2	3	2
534	6238	14395000	48	48_6238	3	2	3	439	334	228	253	2	303	237	3	222	232	2	263	241	277	3	2	3	2	3	295	2	3	255	164	2	321	3	2	234	3	2	219	3	216	2	215
535	7268	16111666	48	48_7268	3	2	3	2	3	2	3	2	227	3	2	3	300	2	422	329	306	3	2	325	3	2	3	2	3	313	218	2	3	2	3	297	2	3	2	3	276	2	293
536	7979	17296667	48	48_7979	3	199	2	299	3	358	698	812	1289	2	3	2	877	3	591	790	1015	2	3	2	3	2	3	2	3	2	3	2	3	2	3	2	3	2	3	2	3	2	3
537	44	4071667	49	49_ 44	128677	107511	152371	169328	188492	172775	147480	183261	172472	178532	136054	167109	215221	154466	163108	172598	159801	100079	178151	151956	173986	185101	185620	170729	180519	161656	176883	165324	148827	138287	133232	177166	158308	172362	185903	187049	138091	166130	173486
538	77	4126667	49	49_ 77	2	3	118554	2	3	2	116849	3	119812	2	3	2	3	2	3	2	3	2	3	2	3	2	3	2	3	2	3	2	3	2	3	2	3	2	3	2	3	2	3
539	136	4225000	49	49_ 136	106666	77664	147806	89591	133625	129808	119610	130447	102013	107381	127777	134651	138232	126244	124283	128819	135103	103558	136829	113951	146792	164241	160336	157432	140596	152258	201548	134198	127118	138039	147598	188590	202398	157660	154587	168276	167196	187047	198168
540	269	4446667	49	49_ 269	40342	13539	91473	69022	100494	104660	78796	79300	77039	72453	78447	94426	98120	73262	81687	70372	72483	54063	79488	66694	94194	111199	103445	102227	101309	80989	106158	39399	98462	74760	73128	102115	102165	101460	90248	100084	84985	101265	101864
541	306	4508333	49	49_ 306	2	1819	57710	3	2	3	51194	2	3	2	42323	69749	3	2	3	35336	47870	25476	2	3	2	83859	3	2	3	2	3	2	63709	41493	41349	3	67160	2	3	2	51944	75578	74193
542	470	4781667	49	49_ 470	714	819	3	2	3	2	3	2	21199	3	2	3	2	28502	3	1260	2	3	2	3	2	54711	3	2	3	22918	48751	23088	42601	2	3	2	3	2	3	2	3	48057	2
543	511	4850000	49	49_ 511	487	2262	3	2	3	2	3	2	3	2	693	3	2	3	2	3	2	3	2	1269	3	2	3	2	3	2	3	2	3	2	3	2	3	2	3	2	3	2	3
544	557	4926667	49	49_ 557	2	2472	24394	3	2	3	2	3	8089	2	3186	3	2	3	2	3210	461	3	2	3	2	3	2	3	2	3	2	3	2	3	3705	2	3	2	3	2	13648	3	2
545	595	4990000	49	49_ 595	880	3641	20843	1571	6915	28691	8939	5448	4722	1210	7103	24722	3	10776	1954	6584	1749	537	2	3643	3	2	3	26828	2	628	3	2	31097	3	6027	2	3	2	3	2	9946	3	2
546	665	5106667	49	49_ 665	2025	5485	12465	3	10386	2	5842	12014	3	2557	10742	2	3	4295	7833	10679	7235	2	3	8801	2	3	2	3	2	8976	3	2	22516	8881	7901	3	9534	2	7966	3	6350	2	3
547	679	5130000	49	49_ 679	2	3	2	3	2	3	2	3	2	2183	3	2	3	2	3	2	3	2	3	2	3	2	3	2	3	2	3	2	3	10404	10499	2	3	2	3	2	3	2	3
548	709	5180000	49	49_ 709	16257	16584	23046	17738	22112	22584	20588	24759	19772	13747	24789	15996	22939	17941	16802	24716	24936	11309	8430	19484	16023	20179	17449	22544	28224	17536	21827	7169	32576	19955	23578	21123	25431	23753	17117	9537	24387	23027	18093
549	740	5231667	49	49_ 740	2	3	2	3	2	3	2	3	2	2948	3	2	3	2	6472	3	2	972	3	2	3	2	3	2	3	2	3	2	27538	3	2	3	2	3	2	3	2	3	2
550	788	5311666	49	49_ 788	1487	2499	3	2	3	5734	4742	8503	2	1270	5581	5829	3	3789	3792	5590	6026	2	3	2	634	339	3	2	3	2	3	2	3	5200	2	765	7836	3	4808	377	6675	2	4114
551	847	5410000	49	49_ 847	3	2	301	3	2	3	2	3	2	3	2	3087	3	2	3	2	3	2	3	2	3	2	3	2	3	2	541	3	2	3	2	3	2	3	832	2	3149	3	2
552	883	5470000	49	49_ 883	2758	4137	3960	463	1038	674	9148	10570	4831	394	3224	751	3711	3	1130	8510	6350	796	2	1185	1217	2183	1191	895	9328	4631	1279	334	11702	5887	4323	768	3953	854	805	764	3	1874	983
553	929	5546667	49	49_ 929	2	3	2	3	2	3	2	3	2	3	2	3	2	3	2	3	2	3	2	3	2	3	2	1106	3	2	3	2	3	2	1688	3	2	332	3	2	3	2	3
554	981	5633333	49	49_ 981	4037	2668	6582	2861	1513	2687	3654	4410	12367	1758	2868	2375	2941	2066	2254	6675	7517	1997	2	3886	3199	3373	3049	2900	5328	3496	3002	1931	9444	4875	4110	3063	3835	2148	2524	3	3240	4706	3144
555	992	5651667	49	49_ 992	2	3	328	2	3	2	4122	3	2	3	2	653	3	659	2	137	3	2	3	2	3	2	3	2	3	2	3	2	3	2	3	2	3	2	3	2	182	3	2
556	1042	5735000	49	49_1042	230	372	3	2	3	1219	2	807	3	862	284	2	3	2	3	2	3	570	2	505	3	2	419	3	2	3	2	3	2	3	2	3	633	2	3	1032	2	3	2
557	1080	5798333	49	49_1080	957	3	619	2	3	1524	1138	1207	556	474	532	745	961	1096	437	421	1059	339	2	308	800	699	792	428	2409	508	3	561	990	684	1064	2	688	421	442	3068	929	466	240
558	1107	5843333	49	49_1107	3	2	284	3	2	3	2	3	2	3	201	782	2	1071	3	2	323	3	2	3	2	971	3	337	2	3	2	360	3	2	375	3	2	3	2	3	2	3	315
559	1183	5970000	49	49_1183	2	672	1005	3	2	652	3	743	574	2	857	693	3	704	634	759	402	390	2	752	746	3	558	461	1387	338	704	597	560	551	1824	2	758	665	360	3	1714	1718	987
560	1220	6031667	49	49_1220	1197	1896	2716	1094	1568	1257	2010	1832	1718	303	1861	2127	1159	889	2813	2910	3278	1192	805	2663	3696	2744	2285	2266	2478	2130	2993	1995	1282	1508	2656	2914	2495	2567	1639	1086	1718	4214	3157
561	1255	6090000	49	49_1255	2	3	498	540	2	3	572	2	3	2	3	2	3	2	3	2	521	3	2	3	2	825	484	3	2	3	827	628	797	2	702	3	2	3	661	2	459	3	596
562	1296	6158333	49	49_1296	1037	1518	1687	2	2256	821	5444	5011	2607	458	268	3	598	1335	604	1068	697	843	2	819	3	2	1894	399	1572	871	1990	423	2372	2254	1562	1263	1638	2547	1584	1257	1286	1234	2640
563	1330	6215000	49	49_1330	3	2	3	2	3	1034	2	3	2	3	2	3	2	3	2	3	2	3	2	3	2	3	2	3	476	476	2	3	2	3	547	2	3	476	2	3	2	3	2
564	1335	6223333	49	49_1335	702	1640	2095	506	593	1362	788	1121	583	3	1345	2266	578	2	1617	1441	1215	3	514	1160	1490	2823	2	2710	420	1448	3	2	1372	2344	3	2	456	618	3	2	3	1753	871
565	1381	6300000	49	49_1381	407	2	3	2	3	2	3	2	3	2	3	2	3	2	3	2	3	2	3	2	427	3	2	3	111	2	3	2	3	2	3	2	3	2	3	2	594	3	804
566	1422	6368333	49	49_1422	10044	10574	10221	33545	29911	19859	7484	5820	4271	19846	19719	18948	4618	2519	6424	5826	5282	947	1870	3642	6137	6254	3615	2801	2374	6812	5332	418	27987	25610	3469	4756	4802	3545	1312	1155	2564	4870	4801
567	1455	6423333	49	49_1455	2359	4984	6375	2	7632	4297	3978	3	2	997	6064	5899	3	737	2	3	2	3	1921	2	3	2	1127	4061	3	2	3	2	7132	6255	3	2	3	987	2130	2	3	2	3
568	1500	6498333	49	49_1500	2	434	3	2	3	2	3	2	3	2	3	2	3	2	3	201	2	3	2	3	349	2	3	304	2	343	3	2	3	311	2	3	2	3	2	3	2	186	3
569	1561	6600000	49	49_1561	1271	1198	1807	1571	2001	3882	2175	2641	3281	2378	1408	740	2864	2451	1272	1580	2636	3430	288	1963	1057	1329	1833	1176	1847	1012	1657	2047	1336	1057	3097	1765	1923	1525	1671	1722	3636	1978	2012
570	1636	6725000	49	49_1636	2	3	2	3	2	3	2	3	6565	2	3	2	4676	3	2	3	2	726	3	2	3	2	3	2	3	2	3	2	3	2	5028	3	2	472	3	2	3	2	3
571	1635	6723333	49	49_1635	5564	5895	6987	5823	5631	3755	6658	6157	9577	4663	6074	6184	4291	4224	6959	6969	7426	5132	6936	5150	6548	6387	4927	6114	5217	6908	5872	4749	7287	7141	3605	6055	5883	5205	4800	6862	4646	5955	5449
572	1680	6798333	49	49_1680	3954	5041	6807	858	2	350	4027	5348	3	2	1394	3	2	1742	1889	5726	6027	3	1585	1903	1420	1593	706	1353	1218	2990	1803	1364	6197	4276	2972	1245	1570	499	960	1744	3998	3740	3225
573	1724	6871666	49	49_1724	320	2	1006	3	2	3	2	340	3	194	2	3	395	2	760	620	659	3	2	3	909	2	3	362	362	2	3	2	3	297	1365	2470	2559	152	2	3	208	2514	2
574	1779	6963333	49	49_1779	2167	2481	2575	542	3	553	673	755	456	669	947	1125	1289	1810	1226	1071	819	1244	2695	819	2106	3280	2287	3208	2081	6089	7003	3904	1938	2135	5191	7455	8459	3494	3648	5642	6074	7529	10281
575	1820	7031667	49	49_1820	2	3	415	2	3	2	3	2	3	2	3	2	3	2	3	2	3	2	3	2	3	2	3	2	3	2	309	3	2	3	2	3	2	3	2	3	2	538	3
576	1854	7088333	49	49_1854	821	944	1347	1027	1404	1298	1341	1475	759	761	1235	1539	777	1063	1987	1462	1455	895	1765	1316	2016	1607	1341	1626	2174	2402	1747	1010	1844	1134	1378	1483	1517	1480	1457	1200	2	1641	1588
577	1901	7166667	49	49_1901	3	2	3	2	3	2	3	2	3	2	3	2	3	2	3	2	3	2	3	2	3	2	3	2	3	539	2	335	3	2	3	2	3	2	3	2	3	183	2
578	1931	7216667	49	49_1931	538	3	181	2	3	750	994	829	1056	452	464	2	1081	640	2849	1428	1279	3	310	1354	2706	724	934	323	1444	3713	1217	1050	2	240	1388	3030	1639	781	682	1209	1433	1809	1628
579	2013	7353333	49	49_2013	2921	2029	2839	2957	1489	1870	3553	3758	8486	3033	954	2369	2864	2083	4166	5282	4620	1181	3899	2420	4450	1774	2047	1790	2865	3214	2390	4217	3662	2072	1210	3465	1555	1933	2296	3859	921	2380	1824
580	2091	7483333	49	49_2091	1029	396	928	1638	3	2	3	2	3	2	3	2	2054	3	2	3	2	3	3281	4453	5506	2	3	2633	286	2	3	2	3	2	3	2	4466	3	2	3	2	3	4854
581	2149	7580000	49	49_2149	7871	7308	10806	10838	8870	9497	6376	6384	4858	2	3	3789	6109	3482	5360	10436	10422	2483	3649	2932	3597	3218	4100	6051	3882	5503	4477	2316	7544	2	8493	5750	4762	2857	4300	2975	6552	6403	3441
582	2181	7633333	49	49_2181	13889	14361	17637	19187	19410	19250	10064	8954	11737	14366	16405	17284	10770	12415	16351	14802	15945	11476	16036	14041	16226	16170	14559	16989	14237	14928	15495	12228	3	7169	13137	15008	14572	14591	14216	14963	12938	15052	15580
583	2214	7688334	49	49_2214	2	3	2	3	2	3	2628	1911	2	3	2	3	1458	2	3	2	3	2	3	2	3	2	3	2	3	2	3	2	3	2	3	2	3	2	3	2	3	2	3
584	2256	7758333	49	49_2256	1431	2515	3560	2669	3928	4410	2486	3036	2050	1194	1496	3250	1476	3038	2	3943	3676	1453	2331	4712	3936	3768	2939	2331	1967	2653	4954	1095	2263	2010	4528	4279	5007	3253	2552	1857	4332	4417	4503
585	2330	7881667	49	49_2330	1222	1807	1759	2038	2181	3148	1885	2170	1440	972	1508	1562	1098	1905	2770	2377	2653	754	1602	3628	2643	2263	2253	1960	2230	1941	2628	833	1544	1173	2321	2633	2423	2074	1545	1390	1099	2416	2603
586	2365	7940000	49	49_2365	4402	4482	4754	6292	4381	4146	6544	5385	5814	4717	4532	4949	4854	3886	6669	7056	7266	4077	5780	5285	5954	4794	4443	5347	6545	6586	5578	5294	5317	4984	5410	5540	6919	4512	3715	6623	4334	6276	5833
587	2413	8020000	49	49_2413	637	772	1024	905	1099	806	3	279	2	515	984	990	3	545	521	743	973	2	766	3	514	547	2	677	533	494	504	3	1522	1335	813	499	908	499	455	2	621	872	694
588	2453	8086667	49	49_2453	275	3	2	3	2	3	2	3	2	3	2	3	2	3	2	3	2	3	2	3	2	3	2	3	2	3	2	3	2	3	2	3	2	184	3	2	3	230	2
589	2490	8148334	49	49_2490	812	619	737	3	1007	473	2624	3059	1911	2	287	3	2	3	532	1031	437	365	485	314	2	3	2	288	433	99	3	273	3300	474	2	486	3	2	3	2	235	3	221
590	2602	8335000	49	49_2602	817	1189	1956	369	873	579	2296	2341	1828	653	733	692	1548	665	3131	2662	3092	697	1045	3022	3414	1205	987	939	1305	2711	2718	589	1131	334	1979	3087	2872	905	840	2	2479	2783	3095
591	2641	8400000	49	49_2641	2072	1897	3	388	2	3	4839	5746	8993	2	3	2	4555	3	942	5574	5746	304	528	447	537	2	3	248	219	727	2	3	2894	356	2	3	329	2	3	2	3	505	2
592	2692	8485000	49	49_2692	594	402	3	689	2	685	3	2	1046	950	549	702	978	730	1017	3	2	3	1115	502	849	715	472	838	1103	909	2	823	3	2	3	779	380	782	619	2	321	594	450
593	2758	8595000	49	49_2758	1503	1949	2212	1701	3430	1772	1354	1320	710	1442	3102	3485	1198	2166	2993	1783	1781	667	2681	2459	3044	3669	1806	3469	1018	2756	2549	865	2782	3341	1490	2633	1897	2624	2003	2644	1560	2115	2004
594	2841	8733334	49	49_2841	3	2	252	3	2	3	2	3	326	133	279	2	3	2	521	410	529	3	2	402	3	2	3	2	227	256	3	2	3	2	3	2	272	464	3	2	228	278	277
595	2861	8766666	49	49_2861	3	2	3	2	3	2	3	2	3	264	2	3	2	3	2	3	2	3	2	3	2	3	2	3	2	216	3	2	3	2	3	2	3	2	3	2	180	300	233
596	2942	8901667	49	49_2942	3	2	240	3	2	433	3	2	3	289	2	3	2	3	545	2	335	321	3	2	3	2	489	3	202	553	338	356	2	214	3	2	3	221	484	2	185	274	3
597	3033	9053333	49	49_3033	2	3	2	3	2	3	2	3	2	267	3	2	502	3	2	3	2	3	2	605	3	2	3	231	2	187	3	165	2	163	3	2	256	205	3	659	2	3	157
598	3095	9156667	49	49_3095	2	3	2	3	2	3	2	659	470	311	343	3	2	3	2	248	371	3	304	2	3	2	3	2	3	107	2	3	2	202	3	2	3	281	2	3	2	200	3
599	3174	9288333	49	49_3174	268	2	3	2	3	2	3	2	3	257	368	2	3	2	3	223	2	223	285	3	2	3	2	3	2	133	3	197	2	427	3	2	469	3	2	3	140	2	3
600	3229	9380000	49	49_3229	2	3	2	3	2	3	2	3	2	3	2	3	2	3	2	3	2	3	2	503	554	3	2	3	2	225	501	3	2	3	2	499	364	3	2	3	2	567	464
601	3271	9450000	49	49_3271	3	2	541	3	2	3	2	3	2	158	312	553	301	3	479	291	2	389	376	583	498	878	901	587	293	278	922	3	2	3	516	673	526	610	981	2	498	726	629
602	3320	9531667	49	49_3320	3	2	3	2	3	752	1323	1728	2694	160	2	3	636	2	3	2	301	3	2	3	2	3	2	3	2	343	627	3	2	3	2	3	2	3	2	3	2	3	2
603	3364	9605000	49	49_3364	1160	1424	1420	1845	1968	2293	2194	2028	2533	1935	2198	2576	1962	512	2658	2989	3026	3	840	2090	2632	704	596	586	1524	1835	585	865	1304	523	857	1988	665	553	419	667	443	1975	943
604	3413	9686666	49	49_3413	365	565	415	2	3	2	3	2	678	3	2	3	2	3	706	202	2	3	2	393	496	3	2	3	2	3	434	2	3	2	3	2	3	2	3	2	222	3	2
605	3454	9755000	49	49_3454	396	415	3	2	3	507	2	451	3	2	344	531	3	517	791	2	3	2	445	502	401	3	564	286	207	829	447	482	2	3	286	498	302	331	610	2	276	3	665
606	3504	9838333	49	49_3504	2	3	2	3	2	321	3	2	3	2	3	2	3	2	3	2	3	2	3	2	3	2	3	294	273	242	2	3	2	3	2	3	2	268	357	3	2	3	2
607	3587	9976666	49	49_3587	3	2	235	3	2	3	2	3	2	3	2	3	2	3	2	3	2	3	2	458	3	471	2	3	342	849	2	181	3	2	3	2	3	361	2	3	940	961	821
608	3627	10043333	49	49_3627	486	2	342	1847	3	711	2	3	2	420	492	3	2	3	2	312	3	2	3	2	485	3	2	3	349	180	835	2	3	666	916	905	774	2	3	2	325	3	2
609	3723	10203333	49	49_3723	3	2	229	3	2	3	2	3	2	3	2	3	2	3	2	203	3	260	2	3	2	3	2	3	2	209	3	155	2	3	2	3	2	3	251	2	321	303	221
610	3774	10288333	49	49_3774	3	2	3	2	3	2	3	2	3	2	3	2	3	2	1443	618	1097	3	2	1151	1298	3	2	3	2	3	2	3	2	3	2	3	2	3	2	3	2	3	2
611	3810	10348333	49	49_3810	3	509	447	2	3	2	3	584	2	3	206	2	555	3	1529	695	666	2	3	1624	1742	2	3	2	492	3	1877	2	3	2	1346	1819	1536	3	2	3	1267	1232	1508
612	3851	10416667	49	49_3851	2	384	264	462	1003	672	2497	3044	3494	861	340	843	558	476	3	771	962	551	1266	2	3	1099	846	619	2	1559	3	868	862	780	345	2	3	901	758	2	132	3	2
613	3934	10555000	49	49_3934	3	2	3	2	3	2	3	2	3	2	3	2	3	2	3	2	318	3	2	3	2	3	2	3	247	2	3	183	2	3	2	3	2	3	2	3	137	170	225
614	3977	10626667	49	49_3977	2	3	246	2	3	2	3	2	3	236	2	3	273	2	3	2	337	3	2	474	344	377	3	2	263	228	3	2	3	2	3	2	355	3	2	3	320	276	280
615	4029	10713333	49	49_4029	2	3	2	3	2	3	2	3	346	137	2	3	2	3	2	3	2	3	242	358	2	575	3	265	2	3	2	153	3	2	3	2	3	399	2	3	2	277	257
616	4103	10836667	49	49_4103	925	1218	1801	427	1115	1028	3	603	251	486	1045	1327	2	1395	1074	735	724	692	1574	1525	1053	1582	1781	1479	559	928	1531	687	1538	949	2248	1465	1287	1054	1173	750	1048	789	1103
617	4225	11040000	49	49_4225	3	2	3	2	3	2	3	2	3	299	2	3	2	3	466	2	3	2	3	372	327	2	3	283	2	507	441	120	3	2	3	2	3	2	3	2	542	407	475
618	4312	11185000	49	49_4312	3	2	3	2	3	2	3	2	3	200	2	3	2	3	2	3	2	3	2	3	2	3	2	3	186	162	266	2	3	2	3	2	3	2	3	2	3	2	3
619	4379	11296667	49	49_4379	2	3	2	3	2	3	2	3	2	172	292	3	2	3	2	3	2	3	2	323	3	2	3	2	224	231	3	2	3	2	3	2	3	2	3	2	3	2	3
620	4456	11425000	49	49_4456	604	781	895	2	3	444	2	448	678	273	327	3	527	590	1590	679	798	2	497	1644	1757	463	538	662	817	1680	2287	385	3	308	1770	1996	1783	565	523	500	1784	1823	1840
621	4540	11565000	49	49_4540	1003	858	1077	423	2	460	3	356	499	440	919	901	376	1175	921	343	441	755	1545	832	1183	1601	1683	1320	563	1221	1202	1154	630	719	1104	1198	1172	1184	1318	892	844	1303	1127
622	4676	11791667	49	49_4676	2	3	309	2	3	2	709	765	470	229	484	3	2	3	875	515	583	549	340	787	870	413	2	317	293	574	671	289	3	278	563	716	410	259	508	442	489	595	437
623	4748	11911667	49	49_4748	2	3	233	2	3	2	3	424	2	179	3	2	3	2	3	325	419	2	3	481	2	3	2	273	322	316	387	3	2	257	494	3	325	342	2	3	450	2	414
624	4845	12073334	49	49_4845	3	2	3	350	2	916	3	782	2	459	3	462	2	3	2	3	2	266	3	2	3	463	496	529	2	162	3	426	2	3	2	3	2	316	3	2	3	2	3
625	4886	12141666	49	49_4886	1082	1666	2967	742	1019	2178	2	2579	3	1071	450	1209	2	1071	1590	1292	2229	641	1450	1559	1393	1091	1253	898	539	779	1014	1269	1505	1184	1052	1261	892	1195	1132	3	1265	1351	1035
626	4907	12176666	49	49_4907	2	3	2	3	2	3	2	3	2	3	869	2	3	2	3	2	1981	3	2	3	2	3	2	3	190	2	3	2	3	2	3	2	3	2	3	2	3	2	3
627	4954	12255000	49	49_4954	916	1314	3519	1734	2	3273	3	3513	2	187	3	2	3	2	446	2958	4010	3	2	933	682	3	2	3	192	305	776	2	614	554	732	654	744	3	2	3	830	696	724
628	5035	12390000	49	49_5035	2682	2809	3681	4373	2	4408	3790	3	3565	804	408	814	3974	1191	3392	3575	2	925	677	3033	730	672	748	822	585	420	1004	250	3664	3212	3	547	602	547	562	722	503	675	803
629	5096	12491667	49	49_5096	9104	10258	9964	2	4198	3	2	3	2	3	492	2	3	2	2513	3	2	3	2	8322	3	2	3	352	649	595	2	284	9213	6969	3	2	461	3	249	645	168	2	244
630	5170	12615000	49	49_5170	6884	7376	7578	11726	12168	10968	10267	13677	9508	3	2	3	14787	2	1868	12979	12717	3	458	6964	1493	2	3	2	3	218	2	3	5263	3553	2	3	2	3	2	3	2	861	3
631	5213	12686666	49	49_5213	2	3	2	8391	8646	8024	8553	10079	17412	290	3	2	13081	3	2	9540	10172	1426	3	2	3	2	3	2	290	3	2	140	1617	3	2	3	2	3	2	3	2	3	210
632	5303	12836667	49	49_5303	2	3	250	2	3	2	3	2	5496	3	2	3	2	3	2	3	2	3	2	3	2	3	2	3	2	3	2	3	2	3	2	3	2	3	2	3	133	195	2
633	5358	12928333	49	49_5358	3	2	230	3	2	3	2	3	2	3	2	3	2	3	2	3	2	3	2	3	2	3	2	3	2	218	3	2	3	161	2	3	2	190	3	2	3	2	3
634	5436	13058333	49	49_5436	2	3	2	3	2	3	2	3	2	174	253	3	2	3	2	287	3	2	3	2	3	2	3	274	265	161	2	3	2	3	2	3	2	248	3	2	3	2	226
635	5526	13208333	49	49_5526	1484	1763	1807	1428	2352	1945	1383	1057	981	1406	2209	1960	647	1927	2016	1067	1609	2455	1753	1779	1753	2331	2151	1987	2483	1764	2049	1668	1889	2035	2084	1869	1955	2026	1657	1646	2049	2079	1807
636	5715	13523334	49	49_5715	3	2	3	632	1070	691	2	348	367	766	194	710	3	655	970	401	2	501	726	662	792	419	504	480	493	1025	593	683	3	510	935	1209	292	490	801	2	1200	873	1009
637	5822	13701667	49	49_5822	3	2	3	2	3	317	2	323	3	200	315	2	3	2	342	3	2	3	296	2	318	3	2	3	245	250	2	275	3	328	2	3	2	166	3	2	3	2	3
638	6152	14251667	49	49_6152	1002	1157	1271	803	973	1222	784	812	648	1196	862	1276	631	1664	1422	704	965	778	1245	1349	1271	1616	1432	1632	1586	1010	1559	987	933	1116	1231	1280	868	1694	1342	1212	1485	1104	1899
639	6191	14316667	49	49_6191	2	3	2	3	2	3	2	3	2	3	223	2	3	2	3	2	473	268	3	2	3	368	2	392	3	2	3	2	3	226	2	3	2	3	2	3	2	3	329
640	6237	14393333	49	49_6237	545	719	849	753	819	769	698	856	711	625	885	738	368	810	662	685	905	810	557	693	616	930	829	687	829	607	676	609	918	695	763	795	801	734	688	714	751	651	776
641	6598	14995000	49	49_6598	2	3	2	3	2	3	2	3	2	211	177	3	2	3	2	3	2	3	2	3	2	3	2	3	2	3	2	3	2	192	3	2	3	2	3	2	3	172	2
642	6788	15311666	49	49_6788	3	2	3	2	3	2	3	2	3	2	3	2	3	2	3	2	3	2	3	2	3	2	3	2	164	3	2	3	2	177	3	2	3	2	3	2	3	2	282
643	7006	15675000	49	49_7006	559	526	473	345	3	648	2	528	415	354	384	527	442	672	578	363	598	320	475	745	585	423	433	554	672	369	594	418	3	349	576	472	372	635	452	632	663	466	809
644	7270	16115000	49	49_7270	417	345	498	2	3	2	856	707	3	2	3	2	551	3	988	826	1045	2	3	981	661	2	3	2	374	437	717	156	3	2	784	625	637	3	2	3	626	709	350
645	7339	16230000	49	49_7339	2	3	196	2	3	2	3	2	3	2	3	2	3	2	3	2	3	277	2	3	2	3	2	3	2	3	2	228	3	2	3	2	3	207	2	3	149	303	220
646	7987	17309999	49	49_7987	2	3	859	2	3	736	1016	728	984	2	3	2	478	3	616	1465	1304	2	3	2	3	2	3	2	3	2	3	2	3	2	3	2	3	2	3	2	3	2	3
647	46	4075000	50	50_ 46	383101	344625	429104	470957	561004	521414	425225	559804	461047	515371	395158	511691	623287	474007	484990	492487	453265	267006	544432	465893	517351	558826	548009	519291	532004	468289	530240	421710	412708	401027	390132	526284	458952	518351	564960	552639	410702	508150	537914
648	134	4221667	50	50_ 134	338168	281706	363036	2	3	2	340842	3	339807	2	349029	3	2	3	2	392313	378703	255320	3	2	3	435990	2	406841	3	354057	420206	327470	2	347967	353845	405084	431066	409114	419204	419106	377553	447580	407038
649	134	4221667	50	50_ 134	3	2	3	2	389138	371890	3	2	3	306083	2	365124	3	2	345480	3	2	3	2	332848	371968	3	2	3	382843	2	3	2	280746	3	2	3	400050	2	3	2	341442	3	2
650	177	4293334	50	50_ 177	3	235495	2	276295	3	2	3	2	3	2	3	2	3	329199	2	3	2	3	2	3	2	3	2	3	2	3	2	3	2	3	2	3	2	3	2	3	2	3	2
651	292	4485000	50	50_ 292	201922	194952	3	2	292358	282116	3	275593	2	235440	230661	280125	284250	250170	260919	3	234856	145947	288473	250207	284296	319141	2	3	2	260972	290227	3	2	3	2	295490	3	2	309216	304534	3	2	307689
652	462	4768333	50	50_ 462	3	2	3	2	3	2	3	2	3	2	3	182053	2	176458	3	2	3	87769	192182	2	3	2	3	2	3	2	3	2	3	2	3	2	3	2	3	2	3	2	3
653	562	4935000	50	50_ 562	90405	90443	2	100627	120092	3	88687	2	99920	3	98342	2	3	2	3	2	3	61025	2	3	145602	2	3	141026	2	132079	3	2	102150	84372	3	2	3	2	3	2	3	2	3
654	698	5161667	50	50_ 698	41666	44333	39854	66289	66492	62752	52049	58063	61711	70835	63734	86402	88840	88401	80463	74439	69585	38457	91293	55093	96174	105604	105359	98231	83843	86803	87759	43974	65200	42852	61494	103142	39817	100362	105156	96670	63860	94792	104390
655	738	5228333	50	50_ 738	36329	2	3	2	58416	60315	46594	49826	66892	75844	56188	75909	82636	3	72614	67533	62167	2	82308	47827	87091	95697	3	88944	2	78512	78541	3	2	3	2	93277	3	2	98797	89085	3	87898	96310
656	885	5473333	50	50_ 885	2	1362	1428	3	2	3	25185	5266	32538	2	3	2	3	2	3	38128	31398	2	3	2	3	2	3	2	3	2	3	2	1500	2674	3	2	2619	3	2	3	2	3	2
657	980	5631667	50	50_ 980	13003	15257	22735	29714	27831	38474	12569	17167	30646	35759	27164	34532	32301	42751	29510	35665	30637	22315	43087	23376	43028	48626	51755	47580	26614	43272	34777	15973	17900	19743	29517	52503	19675	49326	48168	42545	31853	45588	48544
658	1017	5693333	50	50_1017	3779	3501	3	2	3	2	3	2	3	2	3	2	3	2	3	2	3	2	3	623	2	3	2	3	4625	2	3	2017	1478	2	3	2	3	2	3	2	3	2	3
659	1083	5803333	50	50_1083	2763	2151	1382	2254	3161	8324	675	4430	2	3464	1084	1443	3852	11799	1393	3	579	2	7694	1698	9292	13572	3	13543	9700	11928	676	1636	1884	1164	1264	17613	955	16170	14006	10662	1819	12508	2
660	1139	5896667	50	50_1139	773	3	2	626	988	3251	517	648	586	539	613	3	2	3	2	3	551	997	450	1025	588	2	3	2	4841	3	674	1279	560	2	500	10790	654	3	2	5920	1304	3	2
661	1199	5996666	50	50_1199	3	2	3	2	3	819	2	412	3	511	1011	2	2022	4701	3	2	3	491	1425	2	3	969	1083	2	3	939	2	3	2	1207	1266	944	3	2	798	3	860	2	1260
662	1233	6053333	50	50_1233	2088	3	1858	539	808	1069	1371	734	1000	939	878	1212	1786	7412	1189	1196	2054	734	1155	984	4438	1514	1293	806	6031	962	1054	2	1582	1886	689	1199	1019	1299	1558	2887	1130	1763	3
663	1254	6088333	50	50_1254	2	3	2	3	901	2	3	2	3	2	3	2	3	2	3	2	1095	3	2	3	2	3	2	3	2	3	2	3	2	3	2	3	2	476	3	2	3	2	3
664	1304	6171667	50	50_1304	991	848	2	3	591	918	2370	937	1174	976	355	2	3	3029	613	1130	569	642	1140	2	1161	1014	614	752	852	296	1775	3	550	2	476	3	1573	2	688	758	3	2361	540
665	1347	6243333	50	50_1347	532	787	665	2	1073	866	3	2	3	2	531	891	796	393	1090	562	1049	474	1459	322	1169	1158	3	1076	2	343	501	3	815	1420	2	3	772	1365	626	928	2	458	1682
666	1385	6306667	50	50_1385	3	2	3	2	750	3	2	899	3	524	370	2	1591	3	573	2	3	2	3	886	2	3	2	3	2	3	2	3	375	2	3	1209	2	3	2	3	2	3	805
667	1421	6366667	50	50_1421	2598	3073	4480	9693	7467	3990	2728	2275	506	2774	6961	5977	1752	600	1304	695	682	2	736	559	1146	442	504	1187	3	1647	1296	754	7220	7806	388	945	924	624	2	668	3	616	396
668	1461	6433333	50	50_1461	2	3	973	2	3	2	3	316	2	3	2	3	2	3	2	3	964	2	3	507	2	1142	3	2	3	2	817	538	3	2	590	3	579	489	2	3	2	629	3
669	1514	6521667	50	50_1514	220	2	3	4609	2	969	3	253	2	859	325	429	284	3	619	2	3	2	3	1174	508	764	2	3	593	2	3	2	506	3	668	403	482	2	3	2	3	906	669
670	1551	6583333	50	50_1551	429	314	1003	2	1219	2383	904	1837	1557	1447	888	439	3	1667	1006	732	1078	1959	308	2152	925	1212	1101	1015	927	2	1916	1288	941	654	1953	870	1144	1038	1596	3	2163	966	757
671	1653	6753334	50	50_1653	1971	252	4269	2439	3862	2481	2463	513	2	2753	3228	3931	4406	1825	2733	3	3717	2726	4110	2700	3180	3987	4038	3549	2744	3472	2963	3109	3547	3832	2721	2621	3154	3679	3127	2936	2743	3139	3371
672	1671	6783333	50	50_1671	2	3	2	3	2	3	2	3	2	3	2	3	2	3	2	3	2	3	2	3	2	3	2	3	2	3	845	2	3	2	3	776	2	3	2	3	2	3	565
673	1687	6810000	50	50_1687	5461	4018	2786	2	382	3	1258	433	2	511	3	889	10130	935	781	7806	2	788	762	963	3	2	1301	3	4829	1149	2854	1769	2	3	3877	4365	3762	1470	1482	910	6071	3221	5254
674	1726	6875000	50	50_1726	2	1967	962	3	2	3	2	3	2	3	2	3	2	1248	467	3	580	2	3	2	1818	3	638	2	3	2	765	3	648	2	1396	3	2	907	541	1150	689	3	2
675	1779	6963333	50	50_1779	5373	4349	3539	442	762	3	2	362	261	885	1778	1683	6292	2916	508	1218	3	1636	4770	681	3938	4353	3803	5101	7557	5990	9386	5553	2134	2874	6408	12580	12207	5142	5565	9263	8921	10162	13175
676	1815	7023334	50	50_1815	2634	2	3	2	3	2	3	2	3	2	3	2	3	2	3	2	3	642	2	3	1578	2	3	2	3513	3	2	3	2	3	2	2850	3	2	3	2	3	2	839
677	1854	7088333	50	50_1854	11829	10575	10830	11324	10992	10008	10903	10712	8673	8291	11993	11950	12140	8591	14931	11932	13136	8643	13195	10641	14769	11583	9419	12240	17347	14613	11084	8731	11234	11683	10268	14742	14340	10351	10011	14342	9078	14181	12837
678	1885	7140000	50	50_1885	595	3	2	3	320	361	2	661	3	2	3	474	326	2	3	434	2	3	298	2	3	2	3	2	394	3	2	3	2	3	2	3	2	3	427	2	3	2	3
679	1974	7288333	50	50_1974	2	3	2	3	2	3	523	2	3296	3	2	3	2	3	1309	2	3	2	3	741	2085	2	3	2	3	801	407	430	2	3	406	1466	600	2	797	3	2	861	615
680	2014	7355000	50	50_2014	2155	1805	1647	1870	820	3804	4619	1871	9785	1911	463	1583	1701	1077	724	3	1734	2	3627	1706	3	667	1037	1310	1793	1817	717	3098	2035	1271	1577	2413	549	1459	1301	2143	1408	1815	961
681	2072	7451667	50	50_2072	465	182	2	3	2	3	2	3	2	3	2	3	2	3	2	4337	3	2	350	775	3	2	3	2	474	3	667	400	2	3	2	1098	780	3	2	3	2	1075	3
682	2121	7533333	50	50_2121	2	3	2	3	2	3	13744	3242	2	3	2	3	2	3	2	24503	21074	6110	3	2	3	2	3	2	3	2	3	2	15047	3	2	3	2	3	8776	2	3	2	3
683	2148	7578333	50	50_2148	16601	12934	19070	34333	23088	30472	21675	14383	15619	10596	13582	10170	12359	5575	19881	19172	17452	3111	9408	13022	20713	7990	8102	8542	11411	19216	13687	7004	17006	12920	14733	22148	18311	7261	5288	8673	12362	18585	17387
684	2178	7628334	50	50_2178	5248	5799	7113	10957	2	25496	3	2	3	2	5955	4499	7811	2299	7213	3	12080	2	3787	3381	3749	5227	5592	5900	1877	2348	5043	2620	9523	11119	4753	3457	6144	5397	3	2	4183	5476	5606
685	2216	7691667	50	50_2216	6670	4839	3	2	7783	3	15130	7694	9441	2	550	3	13458	2	3	10333	10401	2	234	1060	3	638	2	3	420	3645	1256	2	3	5950	2	3	2	3	657	2	3	2	3
686	2289	7813334	50	50_2289	2478	2716	1058	2	3	2	12089	570	4334	3	524	2	5712	3	2	975	8287	3	587	634	2	875	399	3	493	5201	2	427	3	434	1089	4319	991	517	512	2	715	804	1511
687	2337	7893333	50	50_2337	479	681	3	2	750	517	7890	833	3	2	3	357	1647	2	3	506	5660	656	2	1084	3	2	1109	1086	555	7104	906	451	3	2	3	2854	2	3	369	719	2	541	3
688	2383	7970000	50	50_2383	466	749	1126	2	3	2	6794	1922	3	465	549	1134	639	2	508	979	5066	3	534	1160	2	931	3	2	1233	4236	1017	3	656	704	974	2154	909	795	2	3	2	1195	555
689	2395	7990000	50	50_2395	3	2	3	2	3	2	3	2	224	3	2	551	3	2	3	2	2709	3	359	2	3	2	3	2	3	242	2	3	238	2	3	2	3	2	3	2	3	2	3
690	2427	8043333	50	50_2427	2	234	3	2	3	2	3	2	3	2	3	2	3	2	3	2	983	3	308	2	3	2	3	2	3	2	3	415	2	3	2	375	3	2	3	2	3	2	3
691	2499	8163333	50	50_2499	2	3	974	2	732	3	1887	1047	290	2	367	3	634	2	3	1553	843	2	707	411	3	2	3	2	3	385	2	440	1212	3	277	2	3	2	457	3	2	3	2
692	2563	8270000	50	50_2563	182	379	1109	505	3	2	1057	330	270	3	404	708	2	3	598	1863	1018	445	696	1704	983	576	368	2	468	554	662	3	2	3	1366	1001	1147	2	3	711	1277	1195	1585
693	2651	8416667	50	50_2651	425	348	1211	2	3	2	1115	904	493	3	2	516	3	2	358	923	3	2	503	245	3	2	3	2	428	3	2	3	1184	2	3	2	3	2	3	2	3	2	1053
694	2683	8470000	50	50_2683	328	332	3	2	3	2	3	2	305	3	2	3	406	2	3	2	3	2	3	2	3	593	2	3	264	2	3	2	3	2	3	2	3	2	557	3	2	3	2
695	2774	8621667	50	50_2774	925	310	3	2	910	3	2	3	2	3	452	520	456	2	664	3	2	3	477	624	955	505	2	895	431	427	3	2	542	492	3	1159	2	624	417	461	3	748	2
696	2849	8746667	50	50_2849	416	329	3	2	3	2	3	2	281	3	2	3	2	3	478	351	2	3	387	528	2	3	361	2	371	404	3	2	3	2	443	635	3	2	3	2	3	2	3
697	2909	8846666	50	50_2909	2	286	3	2	3	2	3	320	2	3	2	3	254	2	3	2	3	2	338	427	776	3	2	3	2	3	2	3	2	3	519	404	2	3	2	3	2	3	2
698	2951	8916667	50	50_2951	339	3	2	3	2	3	2	3	2	432	3	2	3	2	3	2	3	2	166	3	2	3	2	3	338	677	2	3	2	3	2	3	2	3	2	3	2	3	2
699	3039	9063334	50	50_3039	235	3	2	3	2	3	460	377	357	484	2	3	247	2	3	382	2	3	180	784	2	3	557	2	3	273	2	3	2	3	307	2	3	2	3	1024	2	3	2
700	3113	9186666	50	50_3113	3	2	3	2	430	3	2	3	450	2	3	2	3	2	3	2	3	2	238	3	2	3	2	3	2	223	3	2	3	2	3	2	3	2	464	3	2	3	2
701	3178	9295000	50	50_3178	3	190	2	3	2	3	2	3	2	3	2	3	257	2	3	2	3	2	320	295	3	486	321	2	309	243	3	2	3	280	2	385	3	2	3	2	3	2	3
702	3245	9406667	50	50_3245	509	554	2	3	2	3	2	441	654	3	2	3	2	3	2	3	2	3	239	2	3	407	492	2	427	843	3	2	3	2	3	509	513	2	3	2	3	2	3
703	3321	9533334	50	50_3321	303	231	2	3	2	3	2	3	237	332	2	3	2	3	2	3	2	3	2	3	2	3	2	3	2	3	2	3	2	3	2	3	2	3	2	3	2	3	2
704	3376	9625000	50	50_3376	3	435	859	2	915	694	3	349	2	1441	733	795	907	3	1283	1179	931	2	507	390	758	454	610	3	624	457	2	796	517	3	501	960	2	3	405	527	2	3	748
705	3420	9698334	50	50_3420	438	222	2	3	2	3	2	355	377	3	2	3	2	3	534	2	3	2	233	327	3	356	394	2	3	2	434	3	2	542	376	600	3	2	3	2	3	807	2
706	3515	9856667	50	50_3515	3	164	2	3	2	3	2	3	2	3	2	3	2	3	2	3	2	3	2	3	2	3	2	3	2	226	3	2	3	2	3	2	3	2	3	434	2	411	3
707	3546	9908334	50	50_3546	2	174	3	2	3	314	2	271	3	2	3	2	221	3	516	2	3	2	382	3	2	3	2	3	2	3	2	3	2	3	2	3	449	2	3	854	2	3	2
708	3588	9978333	50	50_3588	3	2	3	2	3	2	3	2	3	2	3	2	3	2	3	2	3	2	391	420	3	2	3	2	3	2	3	2	3	2	653	3	605	2	3	2	3	630	593
709	3619	10030000	50	50_3619	251	2	3	470	488	488	2	3	2	3	2	3	2	715	3	2	3	2	3	2	3	2	3	2	3	2	3	2	3	515	2	3	2	3	2	3	2	3	2
710	3774	10288333	50	50_3774	408	3	2	3	2	319	3	2	410	3	2	3	336	2	1904	731	903	3	163	939	1386	2	3	2	3	2	3	2	502	3	2	3	2	3	2	3	2	3	589
711	3852	10418333	50	50_3852	482	2	3	2	3	342	2000	2061	3095	344	2	501	3	2	460	960	649	3	555	301	2	528	3	2	3	527	2	3	609	684	2	3	530	2	3	2	3	2	3
712	3989	10646667	50	50_3989	187	2	3	2	3	2	3	2	3	2	3	2	329	3	2	399	3	2	3	249	2	3	2	3	2	240	3	2	3	2	3	2	3	2	3	2	3	457	2
713	4044	10738334	50	50_4044	3	2	3	2	3	2	3	2	322	3	2	3	414	2	3	2	3	2	3	176	2	435	3	2	3	2	3	2	3	2	3	2	3	2	3	2	3	2	3
714	4119	10863334	50	50_4119	2	206	510	3	2	3	2	410	343	3	2	552	891	378	3	2	3	2	195	362	3	502	512	2	3	2	3	2	562	3	551	443	2	3	2	3	2	3	2
715	4227	11043333	50	50_4227	292	191	3	2	343	3	2	3	2	3	2	3	2	3	2	3	2	3	2	384	3	2	3	2	3	220	2	3	2	3	2	3	2	3	2	3	2	3	2
716	4379	11296667	50	50_4379	3	167	2	3	2	3	2	258	3	2	3	2	3	425	2	3	2	3	2	3	2	366	3	2	3	327	2	3	2	3	2	3	2	3	449	2	3	2	3
717	4454	11421667	50	50_4454	2	3	2	3	2	3	2	3	2	3	2	3	2	3	2	3	409	2	229	351	3	2	3	2	3	349	464	2	3	2	3	2	3	2	3	2	3	2	680
718	4545	11573334	50	50_4545	3	351	2	3	2	3	2	3	280	380	2	3	2	3	353	347	2	3	258	2	3	362	510	2	3	238	2	3	2	372	360	3	2	3	2	488	3	625	433
719	4619	11696667	50	50_4619	2	272	3	2	3	2	3	2	3	2	3	2	297	3	2	3	2	3	295	227	2	3	2	3	2	215	3	2	3	300	2	428	3	2	3	2	3	2	3
720	4682	11801666	50	50_4682	2	3	2	3	2	3	891	965	347	2	3	2	300	3	421	393	2	3	476	405	2	3	2	3	2	3	2	3	2	389	378	3	2	3	2	3	2	446	640
721	4748	11911667	50	50_4748	3	243	2	3	2	330	3	2	3	2	3	2	3	2	3	2	3	2	245	210	3	2	3	2	3	2	3	2	3	2	3	2	3	2	3	2	3	2	3
722	4892	12151667	50	50_4892	238	2	3	2	555	654	3	2	3	499	2	480	3	2	3	691	2	3	295	2	3	316	356	2	3	584	2	533	461	3	2	3	2	3	2	3	2	3	301
723	4933	12220000	50	50_4933	2	516	3	653	2	603	477	3	2	3	2	3	837	2	3	257	2	3	201	413	2	3	2	3	378	2	3	2	3	2	3	2	3	2	3	2	3	2	3
724	5030	12381667	50	50_5030	4664	6215	2	1157	1018	6852	4678	4081	7517	531	3	481	4834	2	3	5785	4483	2	592	442	558	362	301	3	2	3	2	465	3	2	336	3	2	488	564	436	3	506	743
725	5052	12418333	50	50_5052	2	3	2	4550	5076	3	2	3	2	3	2	3	2	3	2	3	2	3	2	3	2	3	2	3	2	3	2	3	2	3	2	3	2	3	2	3	2	3	488
726	5100	12498333	50	50_5100	11108	11122	2	10151	13031	11881	5806	5829	2696	3	2	3	5727	2	462	6473	6414	3	216	716	2	3	2	3	2	3	2	3	1022	1003	2	3	2	3	2	3	2	3	2
727	5163	12603333	50	50_5163	1044	8815	3	2497	10582	1456	3229	3257	4070	2	3	2	4095	3	2	2507	955	3	2	259	3	2	3	2	3	2	3	2	3	2	3	2	3	2	3	2	3	2	3
728	5277	12793333	50	50_5277	265	2	3	2	3	341	2	3	2	3	354	2	3	2	360	3	2	1586	3	321	2	3	2	3	428	2	3	2	3	2	3	664	2	3	2	690	3	2	3
729	5333	12886666	50	50_5333	2	3	2	3	2	3	2	3	356	2	3	2	326	3	2	3	2	3	283	2	3	2	3	2	3	208	2	3	2	3	2	3	2	3	2	3	2	3	2
730	5526	13208333	50	50_5526	3	166	2	3	497	735	2	3	2	3	617	2	3	447	648	2	3	899	577	224	581	372	588	2	668	349	522	3	563	571	664	585	690	2	458	3	2	591	593
731	5638	13395000	50	50_5638	3	178	2	3	2	3	2	3	2	3	2	3	2	3	2	3	2	3	173	475	2	3	2	3	2	3	2	3	2	3	2	3	2	3	2	3	2	3	2
732	5702	13501667	50	50_5702	2886	1654	1900	5650	6182	4017	2078	2090	2187	5855	1447	4525	3102	4618	4757	2276	2453	3362	4968	2543	4019	2081	2906	3307	3375	3666	3726	5115	2926	1897	3217	4378	2059	3532	5025	4091	3860	2121	7163
733	6146	14241667	50	50_6146	3	172	2	3	362	2	3	298	2	3	2	3	2	3	2	3	2	3	2	3	2	3	2	3	2	3	2	3	2	3	2	441	3	2	3	2	3	2	3
734	6192	14318334	50	50_6192	818	675	776	1641	1147	1820	1367	987	2	1074	825	575	605	863	949	937	1652	1236	970	574	3	1226	809	1107	455	594	2	969	889	1101	3	508	2	777	529	3	2	3	838
735	6261	14433333	50	50_6261	2	3	2	3	2	3	2	241	356	3	2	3	2	3	2	3	2	3	2	3	2	3	2	3	2	188	3	2	3	2	3	2	3	2	3	2	3	2	3
736	7992	17318333	50	50_7992	2	3	2	3	2	3	2	392	264	3	2	3	400	2	364	405	3	2	3	2	3	2	3	2	3	2	3	2	3	2	3	2	3	2	3	2	3	2	3
737	46	4075000	51	51_ 46	572976	530498	629561	683311	835461	779012	628605	839166	652362	753435	589681	769562	896939	722611	716221	715400	667341	391008	795559	705072	766473	835335	820263	777968	789771	688525	791550	599716	607991	596493	580479	780961	684348	778230	838793	810272	613519	762158	801005
738	122	4201667	51	51_ 122	465172	385583	466075	2	3	572485	452303	604158	2	3	456834	572725	2	511021	531060	520215	506693	296714	582265	526243	568419	639276	607295	587516	581155	506266	581505	387498	428327	464194	441836	576712	550093	583250	613756	596927	456145	576791	602139
739	291	4483333	51	51_ 291	321111	316492	3	2	452467	443057	3	429959	2	347711	323490	3	420643	381692	390551	2	352044	3	427987	400299	424043	472743	2	3	2	379283	433857	3	2	3	2	445621	3	2	463651	447559	343080	440776	463010
740	553	4920000	51	51_ 553	188273	192061	179173	156463	3	2	130716	3	164072	2	115496	3	2	3	204187	166452	2	70073	3	215232	228052	2	3	2	3	2	215839	3	2	237147	153379	247886	201083	3	2	3	166257	236301	245640
741	586	4975000	51	51_ 586	172098	175820	162653	172930	248238	246724	132732	204306	159841	177432	123735	203943	214125	200642	193740	162688	172271	71334	206803	202491	213617	217842	235521	212028	215908	177571	199046	131263	179287	164023	146860	232692	194610	215225	230607	209570	160397	226345	231361
742	713	5186666	51	51_ 713	192951	175165	184199	226424	202516	199582	200317	240798	270850	165592	101859	136760	195901	157150	154503	165077	187940	79928	163145	197890	160425	157032	186436	173079	164614	130485	161283	107131	209868	134244	145778	190033	180452	165053	178544	145417	150480	194139	181638
743	795	5323333	51	51_ 795	2	3	68699	2	3	121962	26872	86251	79629	2	1104	3	2	3	2	3	2	980	3	2	3	2	3	2	3	2	3	2	57579	36164	3	2	3	2	3	2	71348	3	2
744	886	5475000	51	51_ 886	3	2	50704	3	2	3	5846	2	54808	3	903	2	3	2	3	38436	58139	1047	2	3	2	3	2	3	2	3	2	3	35807	14618	2	3	2	3	2	3	2	3	2
745	956	5591667	51	51_ 956	3	54656	56474	2	3	2	3	2	3	2	429	3	2	3	2	3	2	3	2	3	2	3	2	3	2	3	2	3	2	3	2	3	2	3	2	3	2	3	2
746	980	5631667	51	51_ 980	64940	74066	86139	57077	59199	109488	27207	38754	96839	61354	44516	57856	79253	75003	69946	59959	85982	38837	78563	86008	79098	60877	104535	77667	91975	59144	60705	55015	66142	54628	60440	112700	75974	83070	85307	69761	74645	109228	91319
747	1057	5760000	51	51_1057	3	2	23563	773	6820	3	6175	1674	19453	2	8395	3945	3	2	3	5188	25561	9846	13322	24717	2	5939	49625	17700	22141	1356	5352	10301	9600	8756	10724	51420	16258	28284	28045	3903	13604	48692	29790
748	1113	5853333	51	51_1113	1126	3	7642	2	2825	3	1451	2	3	2	1791	2663	3	2	582	3	2	3	2	3	630	2	3	2100	2	451	1138	3	1808	2855	1448	2	1196	3	2	520	1636	3	2
749	1185	5973333	51	51_1185	3	729	2	2026	3	2	3	2	3	2	3	1178	2	3	2	3	2098	2	1427	3	1514	2	3	2	3	2	3	2	3	2	1563	3	2	3	2	3	2	3	2
750	1200	5998333	51	51_1200	2583	2732	5887	2723	3889	11109	3	5161	6644	1005	4053	3204	1279	6890	5866	7604	10005	1831	3297	4156	5703	6126	18781	6354	2567	6076	6894	2	4423	3811	4363	20455	7226	5683	4278	654	5124	20055	2832
751	1253	6086667	51	51_1253	3	1187	2	1167	1638	715	1933	3	2	450	1852	881	3	6242	1505	2	1207	3	2006	900	2	1736	3	1487	2	1909	2256	3	2	3	786	2	2716	1434	1404	3	1746	8884	2
752	1298	6161667	51	51_1298	1127	1796	1358	1347	4164	977	5735	3164	1694	3	2	1957	1336	2162	1793	2935	3039	1615	3	3095	2260	5014	3316	2	1355	4323	3517	3	3029	3012	3455	1360	3395	3812	4065	2137	1957	3388	5686
753	1300	6165000	51	51_1300	2	3	2	3	1501	2	3	2	3	2	3	2	3	2	3	2	3	2	3	2	3	2	3	2	3	2	3	2	3	2	3	2	835	3	976	2	952	3	2
754	1332	6218333	51	51_1332	1037	3599	4501	2603	1507	1055	2901	1629	1279	3	3346	3651	1618	2	2800	987	3	2	3	956	3037	704	2	3	2372	1464	2	3	3813	5481	2	532	3	2	3	2	3	834	1516
755	1382	6301667	51	51_1382	782	688	2	3477	3	2	3	780	823	2	3	462	2	3	1087	2	3	2	3	2	3	2	3	2	1002	3	2	3	698	2	3	2	3	2	3	2	3	2	3
756	1421	6366667	51	51_1421	3641	6298	8085	15185	12317	2991	5483	2895	806	7308	13150	10111	2400	734	2351	1355	1583	368	2153	2	1334	959	1223	2213	3	1904	1061	479	13471	10772	1025	1684	1206	498	829	908	414	751	1202
757	1429	6380000	51	51_1429	2	3	2129	2	3	2	3	2	3	1618	1749	2	544	3	2	3	2	3	2175	679	1310	973	2	3	2	3	2	3	2	3	2	3	2	3	2	3	2	3	2
758	1506	6508333	51	51_1506	3	511	442	2541	922	2	430	3	577	2	284	448	892	3	590	2	1033	347	345	1356	861	3	605	746	411	2	563	524	1169	1193	3	657	664	1119	610	475	488	2	3
759	1586	6641667	51	51_1586	687	2	596	3	653	1762	817	1342	466	742	530	880	2	1113	3	930	2	993	321	1276	631	1030	1074	3	541	790	653	853	999	710	750	1263	794	1202	1658	2	3	1496	1193
760	1636	6725000	51	51_1636	2	3	2	3	2	3	2	3	2	3	2	3	2	3	2	3	2	3	2	3	2	756	3	2	3	2	3	2	3	2	2195	488	2609	3	2	3	2	3	978
761	1649	6746666	51	51_1649	2	1324	3875	3	2886	1914	4990	7433	6064	928	2128	3059	2079	1308	2394	4466	2	1485	2253	2068	1682	3166	2305	2700	929	3	2982	1770	3734	2953	2199	1671	1815	1707	2400	1678	2333	3015	2909
762	1684	6805000	51	51_1684	4056	2626	7613	1004	877	2	2615	14837	3	2	218	687	6760	3	1124	2	4649	1036	1705	1701	575	378	823	3	2733	954	3890	1823	6392	3499	6825	5133	5987	1558	1891	1057	9452	4157	8649
763	1732	6885000	51	51_1732	2	3	6321	2	3713	1654	3357	12495	3	2	4819	3	2	3	2	5942	5099	231	2747	2484	3	4278	3092	3669	2	1180	4166	3	4582	4279	7077	2	7012	3959	3004	1660	7413	5345	6413
764	1779	6963333	51	51_1779	5473	4665	5161	459	3	2	322	3	2	1521	2642	2581	5387	2680	2643	3	2	3189	6486	3	3468	6844	5062	6973	6548	10857	14383	7458	3470	4853	11176	14465	19267	7612	7702	12655	17216	13748	22885
765	1854	7088333	51	51_1854	41989	39831	40949	42107	40904	35636	39924	44688	35050	33101	42379	44361	41628	32983	55942	44730	47852	32400	48284	39600	51168	43542	35945	44391	57786	55632	42421	33792	44337	43603	40363	51756	50242	39468	34093	49444	34514	49416	47238
766	1896	7158333	51	51_1896	2	3	2	3	2	3	2	3	2	3	2	3	2	3	2	3	2	340	3	455	2	3	2	3	2	3	505	2	3	2	878	3	2	3	2	3	2	3	2
767	1937	7226666	51	51_1937	3	2	3	2	3	589	2	3	456	2	3	2	3	2	587	3	2	285	401	678	1131	285	3	2	3	1302	669	2	3	2	1144	1137	721	3	2	658	852	3	2
768	1979	7296667	51	51_1979	3	650	2	3	2	3	9558	5728	2	496	614	3	738	2	3	2	3	2210	578	3135	546	367	2	3	570	2	4317	922	782	784	2658	3	3202	2	3	2	1397	4067	3
769	2014	7355000	51	51_2014	4476	3362	4628	3867	1527	7613	15554	15644	12863	4559	2248	2940	16252	1918	5895	10729	10475	2737	7034	4256	5911	2142	1805	2565	2529	3208	4130	4390	5634	3674	10930	4439	5229	2363	2793	1441	10482	5940	2084
770	2068	7445000	51	51_2068	2	3	2	3	2	3	2	12726	3	3314	1014	2	3	2	3	5272	4844	2	497	3	4096	2	1345	1020	2063	4778	3	2280	1142	1729	2	7589	1835	1231	3	2	3041	3	2
771	2120	7531667	51	51_2120	44322	43257	54409	52534	51125	49881	47496	38114	53206	43433	54060	44273	67039	29144	93760	85216	86914	29499	45384	63798	98863	41021	37030	39789	58178	105919	62641	34074	52339	49218	71019	109003	88207	35880	39641	49043	60467	89779	82109
772	2179	7630000	51	51_2179	5177	7439	11573	3	2	21387	33833	3	4738	2	10049	20214	10310	5338	7481	24007	14568	5851	7430	6589	6024	9508	10740	9406	2342	2618	8013	3766	12239	24250	7842	6206	8975	8569	7967	2502	5429	9795	9174
773	2215	7690000	51	51_2215	4885	4187	3	9970	6009	2	13976	8630	3	4478	2	3	12676	2	6066	7942	3	2	3	2	3	2	8157	3	2	539	3	348	2	3	2	3	672	2	3	467	2	3	2
774	2286	7808333	51	51_2286	1095	3	3653	5075	2788	2	13346	2515	679	1431	1997	1024	6233	3	2334	9186	8859	749	1158	3395	1664	2225	2250	1480	2	4731	3	2	1286	1510	4283	502	5300	1428	1411	928	4682	4126	3064
775	2329	7880000	51	51_2329	3	1562	1650	3200	2	1583	10479	2801	464	3	1545	1345	3583	884	2029	2	5608	676	1110	3000	2047	1833	1618	1694	2085	5240	2380	3	1440	661	1680	1836	1954	1741	1549	972	2	2520	1813
776	2375	7956666	51	51_2375	3	2	1017	1158	686	799	10855	5405	3715	530	310	713	1680	963	1247	2647	3317	1295	974	3	979	1198	812	1131	1407	3659	1272	2	711	803	585	482	489	354	677	476	559	807	1087
777	2412	8018333	51	51_2412	3	2	3	2	3	2	3	2	3	2	3	2	3	2	3	2	3	2	3	2	816	261	3	2	3	2	343	3	2	3	2	3	2	3	2	3	2	3	2
778	2444	8071667	51	51_2444	3	2	3	2	3	2	3	2	3	2	3	2	3	2	3	1005	1222	2	590	3	1263	2	3	2	3	1106	626	2	3	2	3	2	3	2	3	466	555	2	3
779	2472	8118333	51	51_2472	620	520	1500	627	3218	1254	4033	2044	1232	2	703	463	943	3	1181	2831	1504	2	3	2	644	549	565	1016	3	2	1053	520	3021	1851	1228	792	572	3	504	2	596	3	642
780	2501	8166667	51	51_2501	2	3	2	3	2	3	2	3	2	3	2	3	2	3	2	1107	3	2	3	2	3	2	3	2	3	2	3	2	3	1167	2	3	454	2	3	2	3	2	3
781	2552	8251667	51	51_2552	2	274	3	2	3	2	465	3	2	3	257	352	2	3	2	3	2	3	2	3	2	329	3	2	3	2	1089	3	2	430	3	1250	2	3	2	369	1049	3	2
782	2599	8330000	51	51_2599	8486	8640	10637	2464	3768	3289	14509	13739	13655	3701	3614	4707	11625	3484	21218	16141	16338	3565	5616	18140	21376	5065	3713	4295	5718	21981	16644	3179	5113	1904	13743	20144	17304	3956	4320	3	13980	16112	16701
783	2640	8398334	51	51_2640	7281	5322	9421	523	1128	1064	23856	26080	47557	2	1785	1246	19976	735	2889	20831	20689	742	1552	1631	1913	1620	3	765	1584	1693	1228	2	10921	1838	1398	1146	1554	1154	440	468	3	1766	1712
784	2696	8491667	51	51_2696	2	3	2	3	2	3	2	3	2	3	2	3	2	3	928	2	3	2	3	357	2	3	411	2	3	1001	2	564	3	427	2	3	2	3	927	2	3	2	3
785	2763	8603333	51	51_2763	1822	1682	2050	436	2058	913	2328	2267	535	879	1694	1784	1454	2	4367	2653	2859	838	1732	3071	3933	1770	1509	1378	1231	4050	2634	406	1746	1417	2316	3434	2357	1488	1001	1511	1801	2427	2855
786	2797	8660000	51	51_2797	3	2	3	2	3	2	3	2	367	3	2	3	2	3	2	3	2	3	2	3	2	3	2	3	2	3	2	3	2	3	2	3	588	2	3	443	2	3	2
787	2878	8795000	51	51_2878	618	3	2	3	2	797	3	415	508	2	3	2	3	2	1499	869	3	2	3	690	733	496	608	701	2	3	488	2	3	2	3	780	530	2	385	3	221	1003	2
788	2906	8841666	51	51_2906	3	2	3	2	3	2	521	3	2	3	2	3	2	3	2	3	2	3	542	2	3	2	508	3	420	2	3	2	3	2	3	2	3	2	3	2	3	2	3
789	2940	8898334	51	51_2940	1205	1168	1012	875	1483	1268	1827	930	1367	544	896	1134	1385	2	3296	1778	2017	518	765	2013	2450	810	561	408	772	3549	2287	3	1055	657	1932	2747	2041	693	1267	367	1718	2155	1949
790	3032	9051666	51	51_3032	2	429	3	512	2	3	852	2	696	3	329	468	1171	2	631	3	2	346	445	673	950	3	377	2	800	514	640	3	2	3	2	350	3	2	692	1619	534	910	3
791	3092	9151667	51	51_3092	2	397	3	2	3	2	541	440	3	2	3	2	3	2	3	2	3	196	2	3	2	3	2	3	2	3	2	3	2	3	2	3	2	3	2	3	2	3	2
792	3133	9220000	51	51_3133	3	2	3	418	2	3	2	3	279	501	2	3	594	2	3	2	3	296	430	2	3	2	3	2	3	2	3	2	3	2	477	461	3	2	3	2	218	3	581
793	3178	9295000	51	51_3178	2	302	3	495	686	2	629	3	2	3	476	2	3	2	3	2	3	382	526	2	3	467	314	2	3	523	2	3	677	792	446	362	366	2	3	364	505	2	3
794	3226	9375000	51	51_3226	788	708	2	3	2	3	593	2	289	3	2	3	2	3	1271	2	3	2	374	594	1164	3	403	417	2	3	1535	2	3	2	3	1062	615	485	2	3	320	1029	856
795	3272	9451667	51	51_3272	779	786	1296	398	1302	1252	442	490	2	440	1141	1305	916	913	2218	3	2	538	1266	1782	1846	1343	2109	1775	674	1186	2322	479	973	3	1219	2039	1870	1423	2337	2	1151	2055	2082
796	3351	9583333	51	51_3351	3	2	3	2	3	2	995	560	3	2	311	3	2	3	2	3	2	3	2	3	2	3	2	3	2	3	384	2	3	2	3	2	3	2	3	1361	2	3	2
797	3351	9583333	51	51_3351	1115	3	1825	1654	2724	2165	3148	2246	1288	2373	2571	2724	742	2	2471	4192	3648	238	1135	2366	2232	627	1026	728	1954	1967	1417	1868	1538	1460	531	2087	765	526	855	811	521	2356	1398
798	3438	9728333	51	51_3438	3	833	1769	531	1443	853	765	1379	623	2	1365	1206	1034	3	2419	1518	1848	760	1170	1075	2420	1591	926	1443	1005	1254	1902	755	1334	972	784	2297	1586	948	781	606	1537	1203	2874
799	3504	9838333	51	51_3504	1068	1104	1091	2	3	2	3	2	3	604	2	1207	3	1125	976	947	2	1004	1609	1089	1162	1475	1360	1815	489	1573	527	784	843	1075	928	1485	1462	1059	1450	1014	790	1773	1502
800	3559	9930000	51	51_3559	3	2	3	2	3	2	3	2	3	2	3	2	3	2	3	2	3	2	3	2	806	3	407	2	3	502	2	3	2	3	2	3	2	3	2	661	3	2	3
801	3586	9975000	51	51_3586	840	456	703	1677	2	3	2	3	2	3	245	608	2	3	583	2	3	223	664	928	665	931	962	664	562	2167	1647	2	486	532	1771	2720	2217	503	570	452	2385	2329	1374
802	3626	10041667	51	51_3626	742	3	2	3	631	2	3	2	3	2	3	2	3	1089	2	3	2	248	3	2	3	2	3	2	3	2	189	3	2	687	3	2	3	2	3	2	373	3	2
803	3722	10201667	51	51_3722	3	2	3	2	3	2	3	557	2	3	2	467	3	2	3	2	3	445	2	3	2	3	375	363	2	562	802	3	2	482	3	2	640	3	2	537	480	3	785
804	3773	10286667	51	51_3773	2	3	2	3	2	3	426	2	924	3	2	667	1250	3	4161	2334	2702	2	325	2217	3437	3	2	3	2	1757	1179	3	2	532	1454	1900	3	2	3	2	954	3	1051
805	3810	10348333	51	51_3810	2	3	2	3	2	3	562	2	3	2	3	2	3	2	1915	3	2	3	2	1143	1703	3	2	3	2	3	2	3	2	3	2	547	391	3	2	3	2	3	2
806	3849	10413333	51	51_3849	1225	563	978	1367	1015	836	9558	8641	13635	717	1042	652	2159	3	1223	2825	2303	481	929	750	1652	451	553	349	532	1917	714	401	2186	2219	842	1287	1562	637	2	356	627	1725	706
807	3885	10473333	51	51_3885	3	567	2	3	2	3	1036	840	1448	2	3	2	977	3	2	860	3	2	3	2	3	2	3	2	523	1226	3	2	3	2	659	3	452	2	3	2	691	1275	3
808	3930	10548333	51	51_3930	2	3	2	3	2	3	2	3	2	3	294	2	3	817	529	2	3	2	3	719	2	3	609	518	2	737	456	3	2	3	2	435	3	2	480	454	3	2	3
809	3977	10626667	51	51_3977	2	3	2	3	2	3	2	3	679	2	255	3	2	3	903	2	3	369	512	955	1392	396	2	3	2	626	576	332	3	2	525	979	629	3	2	357	1030	3	831
810	4025	10706667	51	51_4025	940	557	1105	2	637	3	555	1122	1550	677	424	540	2	925	2232	1251	1352	340	864	1895	1843	599	3	575	506	1721	880	569	472	2	1261	1833	1301	807	842	3	1600	966	1232
811	4102	10835000	51	51_4102	1363	1194	3300	2	1307	1664	754	1320	322	1022	1775	1641	3	1279	2302	1578	1340	1574	1893	2704	1651	1814	1885	2028	989	1830	2281	2	2307	1421	5578	2051	2033	897	1767	380	1820	1409	1905
812	4199	10996667	51	51_4199	3	359	527	2	482	3	2	3	2	3	581	2	3	2	598	3	2	225	3	499	521	485	278	2	3	415	670	2	3	465	382	533	2	423	3	2	306	3	2
813	4225	11040000	51	51_4225	3	2	3	2	3	2	3	2	3	2	3	2	3	2	3	2	3	374	2	3	2	423	3	2	3	2	3	2	3	2	3	550	2	241	3	2	3	2	3
814	4311	11183333	51	51_4311	2	419	3	2	3	2	367	3	2	3	2	3	2	3	2	3	2	3	426	590	1255	2	3	2	3	641	378	548	2	3	2	893	566	3	2	3	230	2	3
815	4374	11288333	51	51_4374	2	3	2	3	2	3	431	2	3	2	293	3	2	3	2	3	2	3	363	633	2	3	563	2	3	2	1306	671	3	2	668	1377	1291	3	766	463	549	2	1299
816	4455	11423333	51	51_4455	3	773	817	2	3	2	744	633	935	3	193	2	3	2	2046	1303	3	394	852	1972	2074	322	723	602	580	2379	2154	2	3	452	2041	2059	2265	2	714	354	2548	1801	2499
817	4510	11515000	51	51_4510	3	2	3	2	3	2	3	2	3	2	3	2	3	2	423	3	2	3	2	3	2	3	2	3	2	591	363	3	2	3	706	495	2	3	2	3	932	2	3
818	4543	11570000	51	51_4543	976	1071	1119	2	3	2	647	3	886	911	1049	1283	622	970	2256	2	3	1280	1814	1403	2343	1206	1875	1871	693	2495	1723	1195	1154	1052	1675	2232	1593	1239	2370	861	1681	1942	2363
819	4627	11710000	51	51_4627	2	471	3	2	708	3	2	3	2	3	2	574	3	2	652	3	2	3	538	456	2	344	3	414	2	446	673	3	2	484	395	753	458	3	2	3	539	2	3
820	4671	11783334	51	51_4671	2	775	3	656	2	3	1145	987	1191	599	456	623	2	3	1935	2	3	720	1203	1173	1505	659	460	700	566	1316	988	723	2	509	1145	1540	1049	3	1064	899	771	1072	2073
821	4751	11916667	51	51_4751	2	3	651	2	3	2	499	503	512	3	423	2	3	2	1005	3	2	3	378	650	740	2	360	3	2	630	635	3	2	353	662	1143	692	3	628	2	636	799	854
822	4865	12106667	51	51_4865	2485	2445	4555	3	2	3	2	3	2	3	467	971	2	3	2375	2	3	318	2	2270	2388	3	380	2	3	588	1666	2	3	2	1622	2128	1559	3	2	3	1599	2193	2185
823	4909	12180000	51	51_4909	2	3	2	1046	1043	1599	11204	7456	1273	667	848	676	1103	968	3	6298	5493	972	1099	2	2531	1115	1135	500	3	1109	2399	1092	1944	1063	2	2543	3	821	1338	454	2	2609	3
824	4918	12195000	51	51_4918	2	3	2	3	2	3	2	3	2	609	3	2	3	2	3	2	3	319	385	2	3	338	2	3	2	3	2	3	2	3	2	3	2	3	555	2	3	2	3
825	4950	12248333	51	51_4950	2660	2958	7576	3658	9175	8862	2	3	2	3	2	3	2	3	2905	16091	15589	2	3	2582	2	3	2	3	2	3	2	3	1113	1703	2422	2	2332	3	2	3	2961	2	3069
826	5018	12361667	51	51_5018	3	2	14576	538	3	2	17013	16981	18183	780	3	1062	17152	1190	14702	16610	16413	991	555	2	601	599	628	665	846	705	704	565	3	1542	546	1109	2	1321	1106	513	1243	3	1883
827	5035	12390000	51	51_5035	11764	1818	19028	3638	16203	17809	2	3	2	1111	1044	1600	3	1593	19102	2	3	1660	1065	1115	1116	685	904	1061	605	379	1483	665	13581	3304	673	1024	779	1022	2	453	974	1615	1758
828	5099	12496667	51	51_5099	18037	3267	19017	2178	21332	19728	13266	14573	7516	3	2	462	15276	3	13867	15644	14941	365	613	977	2	3	2	3	613	451	412	2	19271	3559	3	482	2	3	2	460	255	727	3
829	5169	12613334	51	51_5169	13750	990	14695	2	13950	15460	3	2	3	2	3	2	3	2	3	2	3	2	269	657	3	2	3	2	3	2	3	2	16646	3787	3	2	3	2	3	2	3	2	3
830	5206	12675000	51	51_5206	2	1755	3	736	2	3	7353	7741	10949	2	3	2	1471	3	2	11165	11960	5455	3	2	3	2	3	2	3	2	3	2	3	2	3	2	3	2	3	2	244	3	2
831	5295	12823334	51	51_5295	3	2	3	2	3	2	3	2	289	3	2	3	2	3	2	3	2	403	462	3	2	3	2	366	3	2	517	3	2	3	2	457	3	2	3	2	355	3	2
832	5355	12923333	51	51_5355	3	375	2	3	2	3	2	3	2	3	2	3	2	3	2	3	2	281	3	2	3	2	3	2	3	2	225	3	2	3	2	402	3	2	3	2	3	2	3
833	5445	13073334	51	51_5445	2	3	2	3	2	3	2	3	2	3	455	2	3	2	3	2	3	338	2	3	2	372	339	3	2	3	380	2	3	366	2	3	2	3	2	3	2	3	2
834	5525	13206667	51	51_5525	3	700	999	770	1513	1447	991	2	3	630	1154	1211	2	900	1478	3	2	2239	1122	1352	1086	792	1084	997	1566	1256	956	1054	1078	1249	1139	1031	1218	1051	703	833	1244	1027	1119
835	5561	13266666	51	51_5561	3	2	3	448	1120	839	2	3	2	3	251	2	3	2	3	2	3	2	3	2	3	2	3	2	3	2	3	2	3	2	3	2	3	2	3	2	3	2	3
836	5702	13501667	51	51_5702	6601	4564	4328	13470	13301	9980	4858	4867	6919	13540	3235	9619	8844	10460	11045	4564	5975	7244	11189	5877	8675	4943	6786	7766	8316	8957	8852	10702	6646	4827	7085	9413	4237	8556	11407	10076	8630	4723	16187
837	5778	13628333	51	51_5778	2	3	2	1049	3	2	3	2	3	2	355	3	2	3	939	2	3	611	1636	683	698	2	3	2	3	2	499	3	536	617	2	3	2	758	3	2	613	3	1414
838	5820	13698334	51	51_5820	2	3	2	3	2	3	2	3	2	3	200	2	3	2	3	2	3	357	2	3	2	3	2	3	2	3	2	3	2	3	2	440	3	2	3	2	3	2	3
839	6154	14255000	51	51_6154	511	622	699	2	3	1063	702	683	2	730	541	698	3	804	1291	2	3	1023	594	1119	2	774	976	917	827	541	755	3	551	682	813	1125	478	652	470	2	988	846	1414
840	6192	14318334	51	51_6192	1542	1490	1498	2994	1712	3126	2000	1921	622	1910	1207	1321	1895	1104	1287	1652	2508	2244	2025	1224	836	2436	2233	1559	605	878	692	1965	1407	2236	586	1154	3	1657	1256	1039	514	2	1455
841	6238	14395000	51	51_6238	3	2	3	2	3	2	376	3	537	2	345	3	2	3	2	3	2	519	3	2	3	383	612	2	3	2	393	3	2	324	421	372	3	2	3	2	349	3	2
842	7269	16113333	51	51_7269	3	494	2	3	2	3	1353	573	383	2	3	2	875	3	1132	1245	1452	2	3	1102	2	3	2	3	2	3	342	2	3	2	537	3	464	2	3	2	398	3	2
843	7341	16233334	51	51_7341	3	2	3	2	3	2	3	2	3	2	3	2	3	2	3	2	3	384	2	3	2	3	2	3	2	3	2	391	3	2	3	2	3	2	3	2	532	3	2
844	7976	17291666	51	51_7976	805	3	1343	916	1058	1231	2404	2250	5038	2	3	2	2630	3	1583	2738	3170	2	3	376	2	3	2	3	2	3	2	3	2	3	2	3	2	3	2	3	2	3	2
845	46	4075000	52	52_ 46	1595615	1519838	1722276	1848384	2326287	2151471	1734364	2347392	1720815	2050950	1637965	2162466	2445673	2034946	1960400	1961943	1843895	1084501	2168695	1985344	2112019	2327809	2277518	2166583	2185798	1891008	2210249	1629798	1671577	1657781	1611819	2144879	1891291	2162602	2319046	2197081	1709496	2118421	2218765
846	122	4201667	52	52_ 122	1292804	1116390	1279398	3	2	1601981	1278066	1730641	1201096	3	1311465	1650168	2	1435919	1475687	1460988	1415116	884880	1611155	1502089	1591662	1813630	1710661	1660991	3	1431129	1663212	1087925	1208215	1320919	1241707	1614661	1539701	1656271	1711247	1655359	1286845	1607266	1702288
847	288	4478333	52	52_ 288	908780	920337	2	907492	1285783	1230934	3	1249726	2	968004	3	2	1174887	1047158	1090765	3	1004067	2	1192889	1150328	1193660	1378194	3	2	3	1095814	2	3	2	3	2	1253567	3	2	1285864	1240070	971722	3	1327094
848	586	4975000	52	52_ 586	2	3	433163	2	3	2	416319	3	2	3	442781	2	3	2	3	2	3	2	3	2	3	2	3	2	3	2	3	2	445791	480262	3	2	567542	3	2	3	2	3	2
849	710	5181667	52	52_ 710	386057	392726	337922	517310	474752	433859	421382	551285	512396	381900	406303	516361	524990	294512	392133	424305	427651	289493	405864	456560	454795	584078	514699	511723	530347	454558	494770	295333	405936	389772	350073	527853	494247	542888	442635	447788	388619	392349	588685
850	813	5353333	52	52_ 813	3	2	3	2	3	2	206674	3	215626	2	3	2	3	2	3	2	3	2	3	2	3	2	3	2	3	2	3	2	223265	3	2	3	2	3	2	3	2	3	2
851	884	5471667	52	52_ 884	3	2	97800	3	2	3	144683	2	150530	3	2	3	2	3	2	187526	221704	3	2	3	2	3	2	3	2	3	2	3	169018	176105	2	3	2	3	2	3	2	3	2
852	961	5600000	52	52_ 961	3	2	3	170366	2	3	107177	2	3	2	3	2	3	2	152003	3	2	3	2	3	2	3	2	3	2	3	2	3	2	3	2	3	2	3	2	3	2	3	2
853	959	5596667	52	52_ 959	88103	141415	77373	182142	180932	167693	93504	204053	155112	95302	127187	270498	224849	19447	156752	170863	215604	84696	134915	225910	197642	305606	237195	223555	287368	252945	224833	90927	156139	155297	118555	294626	202924	286908	132563	174787	130729	85143	319400
854	1079	5796667	52	52_1079	4515	69260	11451	3	2	70405	32113	3	2	3	74823	2	143073	5768	3	78256	124525	40257	2	3	2	244478	164403	158221	205417	3	2	37399	77842	81135	51145	3	133490	226095	46252	87939	57069	9597	250581
855	1152	5918334	52	52_1152	2245	2	3507	3	61605	2	3079	3	2	5131	3	179765	2	8178	3	2	3	2	3	2	3	210184	2	117984	3	2	3	2	39092	3	2	3	2	192327	3	2	3	4470	2
856	1176	5958333	52	52_1176	3	2	3	2	3	2	3	2	4474	3	2	3	2	3	2	3	2	7150	3	2	3	2	3	2	3	2	3	2141	2	3	2	3	2	3	2399	2	3	2	3
857	1183	5970000	52	52_1183	1289	2	4743	3	2	3	5409	61335	15006	4611	2	3	69092	2	1139	9364	62662	14691	3695	75728	3	2	83006	3	148705	2	78214	8827	3	2	17832	3	60930	155886	12100	2	13997	7021	181177
858	1219	6030000	52	52_1219	5476	8666	18817	53582	11357	3055	21247	49792	3	2	11634	131605	3	15016	20223	22784	68910	1329	15467	69189	30376	165304	73353	70760	2	124251	75219	1861	11410	7734	7936	143161	59674	150675	2275	4613	18242	28463	180653
859	1255	6090000	52	52_1255	3	3680	4693	2	2718	3	2	3	3834	1548	3075	2	3	2	6007	3124	3	2	3	2	3110	135620	3	2	3	2	3	2	4257	1852	3	2	3	2	3	2	3860	7206	3
860	1307	6176667	52	52_1307	2	3	1264	2	3	2	3	2	3	2	3	2	3	2622	2	1470	3	2	923	3	2	3	2	3	2	3	2	3	2315	2	3	2	530	3	2	3	2	3	2
861	1309	6180000	52	52_1309	3394	1790	2848	3	3624	2356	9000	3753	3476	2	2667	3	2	2025	1821	1088	1906	1083	4190	3	2	99241	1786	1764	3	51677	2784	1201	1779	3852	2	3	3893	84015	1891	623	2	1781	105168
862	1353	6253334	52	52_1353	3254	2615	3	2	3	2499	1897	928	2	2843	3	2	1088	3	2368	2453	2	3	1361	2	2785	3	2	3	2	3	2	3	2	3	2	3	2	3	2	1097	3	2962	2
863	1406	6341667	52	52_1406	3	2	2086	3	2	3	2	3	2	3	2	3	2	3	1001	2	3	2	3	2	3	2	3	2	3	2	3	1201	2	3	2	3	2759	2	3	1097	2	3	2
864	1422	6368333	52	52_1422	13211	15849	17796	43931	32023	11607	13298	5340	3	18939	35076	66009	4359	2438	2735	4591	4965	1280	2303	1274	2558	2	2632	4917	3	2	3072	1005	35523	31209	3	2	2235	3	2	1929	3	1891	2
865	1481	6466667	52	52_1481	2789	1307	2125	3	2583	2	3	2	3	2	4561	3	2	1000	3	2	3	2	664	3	2	3	928	2	3	2	1212	3	4368	2	3	2	3	2	3	989	2	3	2
866	1516	6525000	52	52_1516	3	2	3	2	3	2	3	2	3	1707	2	3	2	644	3	2	3	2	3	2	3	2	3	2	3	2	3	2	3	2	3	2	3	2	1308	3	765	2	3
867	1532	6551667	52	52_1532	2072	1483	1991	2	1494	1358	4316	2663	3	1134	1044	2	2065	1389	1175	3488	1538	3	1065	985	2	3	2	530	1226	2517	2754	3	2	4413	3	2502	1980	2	1801	2197	1623	2676	3
868	1577	6626667	52	52_1577	2	3	2	3	1444	2011	2	2355	3900	3	2	3	2	3	2	3	2	3	2	3	2	3	2	3	2	3	1018	2	3	2	1316	2186	3	1035	2	3	2	3	2
869	1605	6673333	52	52_1605	3442	3	2	3	2	3	2	3	2	3	2	3	2	3	2	3	2	2458	3	2	3	2	3	2	1997	3	2	3	2	3	3999	2	3	2	3	2	3	5011	2
870	1649	6746666	52	52_1649	4261	3	4820	2	2422	1707	3	25989	14236	1628	2516	2677	5811	1181	3474	2	3	1763	2	3847	3253	4183	2649	2775	3	2783	3703	1382	5231	4042	3827	4433	3177	3192	3254	2	3	8127	3153
871	1671	6783333	52	52_1671	2	3	2	3	2	3	2	3	2	3	2	3	2	3	2	3	2	3	2	3	2	3	2	3	2	3	3880	2	3	2	3	2	4293	3	2	3	2	3	3194
872	1690	6815000	52	52_1690	13081	5849	18385	2590	1336	990	30775	47472	2	2641	3	1369	18817	5477	2200	24251	16149	6937	2658	3330	2889	3220	6132	5461	7001	9310	17687	10503	19101	11077	29473	20692	26966	7496	9949	9263	42050	22828	34482
873	1732	6885000	52	52_1732	2	3	20173	2	9089	7978	39418	45272	3	2	17562	7275	3	2	5640	24567	21011	3	6579	5816	7684	14442	11187	11555	2	3	15754	2	16230	14241	22599	3	25485	12682	10934	3332	25195	16078	19626
874	1772	6951667	52	52_1772	2	3	2	3	2	3	30663	2	1510	3	2	3	2	3	2	3	2	3	2	3	2	3	2	3	2	3	2	3	2	3	1470	2	3	2	3	2	3	2	3
875	1778	6961667	52	52_1778	21600	19960	21498	1614	592	2	21373	32337	4676	6417	12030	7670	5401	12384	3	2095	10892	16876	26545	1222	18542	28164	22824	29697	20861	45259	60083	33394	18713	23707	49595	63886	88980	32384	37113	53779	65894	69889	97682
876	1815	7023334	52	52_1815	2	3	2	3	2	3	2	3	2	3	2	3	2	996	3	2	3	2	3	2	3	2	3	952	2	3	2	3	2	3	2	3	2	1335	3	2646	2	1466	3
877	1813	7020000	52	52_1813	2768	1737	2502	897	3079	2576	2	31692	558	1240	3547	3736	1235	1321	4253	2884	2525	2305	4141	2902	4660	2992	2354	2967	4032	3775	2760	3	4393	1948	2	3643	5215	4153	2477	1940	1860	3426	4141
878	1891	7150000	52	52_1891	1569	1814	3	2	3	2	3	28074	2	3	2	795	2518	773	1456	877	3	2	1476	3	2	658	900	3	977	2	3	2	3	2171	2	1224	2550	3	2	3	994	647	1562
879	1936	7225000	52	52_1936	2	3	2	1013	3	2	3	2	588	3	2	3	2	3	2	3	2	3	2	2227	3907	3	1918	2	3	2	3	2	3	2	1103	5778	1797	3	2005	1433	2	3	2
880	1982	7301667	52	52_1982	926	3	2	3	595	1774	32382	31691	2	1569	3	2	4053	3	2856	2	2659	3	2	3	2	3	2	3	2	2816	1423	1460	3	1317	2	3375	3	522	2	3	2	2050	1019
881	2013	7353333	52	52_2013	13506	9236	13438	10008	6526	16775	39035	37915	25829	8916	5713	8013	14840	7289	18888	30219	30441	5419	16901	11861	19424	6343	6940	8214	11451	10056	11089	14721	15065	9411	5318	13596	9512	6158	8958	11113	2858	11622	7853
882	2045	7406667	52	52_2045	3	2	3	2	3	2	22210	3	2	3	877	2	3	2	1006	3	2	3	2	3	2	3	2	630	3	629	2	3	2	1851	868	1178	3	2	1379	3	2	3	920
883	2109	7513333	52	52_2109	2	3	2	3	912	2	40701	23242	3	2	3	2	4415	3	2	32348	32276	6970	11469	15147	18375	3	6815	7221	10310	16954	13067	4738	2	3	15698	19048	15587	5745	7606	5513	2	19735	16780
884	2154	7588333	52	52_2154	18487	17738	33450	96055	79206	76658	53453	37006	13724	3	34718	21488	13150	7169	17460	36933	39266	6637	13940	10086	14497	8139	15154	22614	12295	15726	12096	4154	42792	29268	30323	11904	19444	6985	15353	6154	27671	23169	13659
885	2172	7618333	52	52_2172	2	3	15386	2	3	91552	2	3	2	49424	3	2	3	2803	18007	2	3	5467	2	8484	3	7748	9097	9218	9279	11460	5914	2419	2	19134	8478	3	6494	6975	9064	8775	8790	9731	9236
886	2214	7688334	52	52_2214	10565	12976	2	3	2	3	32922	24329	2579	2	3	2	29848	3	14888	20786	2	3	2	3	2	3	2	1178	3	2	3	2	3	2	3	2	3	2	3	2	3	2	3
887	2264	7771667	52	52_2264	2007	10419	9805	2	53385	3	19837	24301	4118	2	4380	4363	15191	1809	7399	24332	23761	3743	4304	11894	3262	6739	4365	4927	3216	7886	11673	826	12276	6301	16548	3549	16019	3742	4987	2664	14264	13636	11798
888	2328	7878334	52	52_2328	3	5543	3948	2	45484	36979	5559	19365	1558	3	3394	4571	2	2340	6890	9226	12584	1397	4164	8880	4018	5469	4524	4543	5192	7452	5832	3	5432	3468	4346	5119	5196	4784	3512	2783	3266	6923	5519
889	2376	7958333	52	52_2376	3312	2256	2755	15359	2	3	13716	23929	11203	1204	1299	1678	4253	998	1010	2	4893	2799	1209	2333	1643	2373	1452	1275	2863	2542	3	2	1385	3	2	3	2	583	1589	1411	1766	1420	1066
890	2444	8071667	52	52_2444	3	2	3	2	3	2	3	2	3	675	2	3	857	2	3	2	3	2	3	2	3	2	1029	3	2	605	3	2	568	3	2	3	2	3	2	3	2	3	2
891	2471	8116667	52	52_2471	897	770	3888	1232	21541	4417	10874	10587	747	1227	2807	1833	3	625	1011	6100	3263	2	3	1495	1176	733	1667	2037	761	2	1218	686	9340	5168	2313	3	852	1116	625	913	1447	1803	1040
892	2511	8183333	52	52_2511	1118	2	1876	3	2	932	3	2	3	2	3	2	827	3	2	3	2	3	2	3	2	854	694	3	2	3	2	3	2	2735	3	2	3	2	3	2	3	963	2
893	2548	8245000	52	52_2548	3	2	3	2	414	3	2	624	3	2	3	2	828	3	2	3	2	3	2	3	2	1063	3	2	3	623	2	3	2	3	2	982	3	468	2	3	831	2	416
894	2595	8323334	52	52_2595	1667	1908	6060	3	1863	2087	2	16609	3413	820	2277	2867	3	2659	9849	16277	11690	2237	2984	11091	9654	3209	2525	2322	3158	7675	9451	2	3216	1156	7969	8471	10506	2427	3086	3	7924	9242	10589
895	2696	8491667	52	52_2696	1577	775	8427	2	4343	3833	24081	18894	6190	2299	5467	4222	3998	1330	2437	21589	12472	3	1929	3906	4350	6400	3031	663	6315	2085	5105	1165	8471	5496	5175	6322	7462	4845	2	2970	6151	1459	1521
896	2728	8545000	52	52_2728	3	2	3	2	3	2	3	2	1410	3	2	3	766	2	3	7430	754	2	3	2	3	2	3	2	3	2	3	2	3	2	3	2	3	2	3	2	3	2	3
897	2764	8605000	52	52_2764	2846	2407	2345	760	4697	1918	11476	3969	1132	2	2848	3623	1428	1727	6937	9546	3978	1352	4730	4533	6143	3543	2549	2929	2235	6163	4180	3	4101	4404	2773	4799	3510	3016	1963	1689	2714	4222	4434
898	2818	8695000	52	52_2818	729	1021	2	3	805	2	4617	1586	3	502	2	3	2	3	4197	3337	1994	2	797	3	2486	2	3	945	2	722	3	2	981	3	2	2053	655	3	861	2	3	1418	1281
899	2894	8821667	52	52_2894	2	3	2	3	248	2	3	2	3	2	3	2	604	3	2	3	2	3	2	3	2	3	548	2	3	2	3	2	3	2	3	2	3	2	3	2	3	2	3
900	2941	8900000	52	52_2941	819	920	1071	2	2729	1493	1368	826	3	2	3	568	2	1161	2774	1596	948	774	3	2	3	704	1095	2	1918	1900	1541	3	1379	1116	2	1183	1096	835	1511	3	1024	810	1674
901	2974	8955000	52	52_2974	2	3	2	3	2	3	2	561	3	2	3	2	3	2	3	2	3	2	3	2	3	2	3	2	3	2	3	2	3	2	3	2	3	2	3	2	846	3	435
902	3025	9040000	52	52_3025	800	2	3	736	689	2	3	1422	1090	797	2	808	1636	942	3	1844	2	3	2	2583	1765	3	2	3	1774	574	2	3	530	2	3	2	820	759	1655	3541	3	2	1578
903	3095	9156667	52	52_3095	3	2	3	2	491	3	1522	1506	2	3	2	703	3	912	2	3	1257	2	608	3	2	3	2	744	3	2	3	2	714	3	2	3	2	741	1056	3	2	3	2
904	3180	9298333	52	52_3180	3	2	3	2	3	2	3	2	3	2	946	3	2	3	2	3	2	958	3	2	1014	3	2	796	3	652	2	3	1073	1049	2	3	2	3	2	3	2	3	808
905	3224	9371667	52	52_3224	1241	2	1318	3	784	2	3	2	3	2	3	2	3	638	2449	2	3	2	3	1755	3079	577	2	614	3	1552	1987	2	3	2	3	3013	2342	471	2	3	529	2334	1844
906	3271	9450000	52	52_3271	1952	1925	3011	2	2757	3054	3	1110	1302	882	2317	2981	1194	1979	3686	1603	1008	2146	2554	3097	4686	4220	4647	4230	940	3163	4449	2	2947	3	2649	5703	4532	2582	5352	2	3101	4821	4637
907	3320	9531667	52	52_3320	3	2	3	2	3	2	2416	2589	679	3	2	3	2	3	2	3	2	3	2	3	2	3	2	3	2	3	2	3	2	3	2	3	2	3	2	3	2	3	2
908	3351	9583333	52	52_3351	3823	3882	6435	7451	9201	8730	12466	8648	9633	7981	9798	9531	3161	2314	9146	13578	13580	1206	3092	8725	7584	1575	2768	2161	7094	5718	2609	4467	5666	5093	3182	7846	2210	1583	2410	3753	2500	7610	4122
909	3415	9690000	52	52_3415	1090	844	2738	3	2	3	2	559	890	3	2	3	1479	2	4044	3	3302	1331	962	2587	4180	2	1598	3	906	2726	2686	2	3	2	1527	3481	1190	3	2	1771	2244	1009	3305
910	3447	9743333	52	52_3447	1043	3	3286	2	1855	2368	3	2283	2	3	2056	1567	2	3	3176	3528	2517	2	3	1413	2337	2532	2	3	1622	3550	1478	1024	1568	1895	2248	2072	1190	870	1106	2735	2652	2248	1683
911	3524	9871667	52	52_3524	2	3	2	3	197	2	3	2	485	1164	3	706	2	745	3	2	3	2	3	2	3	2	3	673	2	3	2	1029	3	2	3	2	3	2	3	2	3	2	3
912	3584	9971666	52	52_3584	1581	986	1442	3419	688	1517	2	564	3	1112	2	1143	385	1377	2276	3	2	3	1488	2130	1989	1590	1390	1130	953	6366	3869	684	1117	1343	5032	6237	4311	501	1678	1187	4301	5507	3946
913	3629	10046667	52	52_3629	1584	814	2	3	472	2	3	634	2	3	2	3	2	2077	3	2	3	2	3	2	3	889	2	3	2	3	2	3	902	2	1088	3	2	3	2	3	594	588	2
914	3692	10151667	52	52_3692	1059	3	2	761	450	3	2	435	3	2	3	590	2	737	3	2	3	2	3	2	3	2	3	2	629	903	3	2	923	3	2	3	944	2	3	2	650	1214	757
915	3724	10205000	52	52_3724	511	3	2	3	2	3	2	3	2	3	2	928	3	600	2	3	2	3	2	3	2	3	2	3	2	3	2	3	2	3	2	3	2	3	2	3	2	3	2
916	3782	10301666	52	52_3782	728	3	1024	2	304	3	1392	754	923	2	3	810	1207	2	5357	3339	3189	3	575	3063	4022	2	3	2	3	2	3	2	3	2	3	2	3	2	3	2	3	2	3
917	3811	10350000	52	52_3811	2	3	2	3	2	3	2	1501	3	2	3	2	3	2	3	1724	1670	2	3	2	3	2	3	822	2	3	2	3	2	3	2	3	2	3	2	3	2	3	2
918	3850	10415000	52	52_3850	3	878	1193	1178	2410	2296	8615	7135	3783	2	1633	2208	862	809	4411	2916	2296	1572	1958	3492	3594	1596	1501	741	3	4078	3752	942	2288	2424	2330	3497	3138	1676	1080	953	2717	2496	3238
919	3935	10556666	52	52_3935	640	2	3	2	495	3	2	3	808	2	3	2	3	895	908	990	1634	2	3	1922	1464	2	904	933	3	1024	892	811	2	3	2	3	2	579	3	2	561	3	2
920	3977	10626667	52	52_3977	3	2	3	2	897	3	2	3	992	524	2	633	965	1198	2502	1050	1150	669	1039	2156	3291	771	957	3	855	1749	1352	2	3	2	1682	1990	1839	3	983	986	1420	1020	982
921	4027	10710000	52	52_4027	2	3	2	3	540	2	3	1200	1249	2	3	2	578	1270	1028	1159	3	2	1149	1702	1320	940	648	614	3	961	1007	2	746	3	1597	2	1120	761	967	3	1024	977	841
922	4100	10831667	52	52_4100	3157	3346	8416	884	3066	3764	2998	3189	1240	2311	4315	4054	2	4005	5297	3986	3482	3243	4675	6169	3783	5368	4634	4977	1600	4437	5859	778	6735	4037	10848	4650	4412	2451	3908	1171	3666	3046	4412
923	4202	11001667	52	52_4202	3	2	2063	3	2180	1195	2	579	3	2	1649	1227	3	933	1303	2	1004	3	1242	2	3	2052	1301	1505	1110	1336	1410	2	1468	1573	1592	1699	1891	2009	1326	3	1413	1374	1364
924	4312	11185000	52	52_4312	2	3	2	3	574	2	3	540	850	2	3	2	3	2	1375	3	2	3	897	2	3	2	3	2	3	747	1220	2	3	2	3	1203	2	3	2	3	2	683	876
925	4370	11281667	52	52_4370	3	2	3	2	874	3	2	3	2	557	3	2	3	599	554	2	3	2	3	2	3	2	3	657	2	519	3	1162	2	3	2	3	2	693	3	2	3	2	995
926	4456	11425000	52	52_4456	960	2086	2472	3	140	924	2	861	2046	3	2	850	742	3	5058	3179	2359	2	1528	4406	4502	862	1071	1092	739	5696	4993	3	796	2	5234	5099	5186	735	1279	996	5481	5153	5736
927	4511	11516666	52	52_4511	3	2	3	2	3	2	3	2	3	2	3	2	3	2	3	2	3	2	3	2	3	2	3	2	3	653	2	3	587	2	3	2	3	2	3	2	641	1182	484
928	4543	11570000	52	52_4543	825	1337	2182	3	968	869	2	575	1041	1167	1889	1931	3	845	2553	2	3	1803	3262	2367	3449	1566	2402	2487	820	2859	2929	2	1681	1119	2412	3477	2748	1659	3365	882	2748	3239	3116
929	4625	11706667	52	52_4625	3	1227	2	3	1604	1019	2	390	3	2	3	1340	2	3	870	2	3	2	1359	3	1484	1263	1436	1371	1294	595	1077	2	654	3	2	1955	658	1450	3	2	3	1210	668
930	4674	11788333	52	52_4674	644	1015	2	3	329	2	2029	1738	3433	537	1415	594	3	940	2974	1831	1924	1657	2040	3122	3310	1637	1575	1464	1032	2434	2151	1267	443	2	1846	3361	1872	946	1088	1687	1318	1884	2566
931	4755	11923333	52	52_4755	806	3	2	3	853	2	3	1129	2205	2	3	497	2	3	1626	1189	1378	828	2	1549	3	2	949	733	3	1277	1292	2	3	2	1149	1561	1380	3	2	3	1096	1259	1654
932	4864	12105000	52	52_4864	2	3140	8368	3	2	3	2	3	2	3	2	1437	3	1794	2	3	2	3	2	3	2	3	2	1381	3	2	3387	3	2	3	3538	2	3585	3	2	3	4022	3776	3422
933	4886	12141666	52	52_4886	3473	2	3	1416	3092	18609	27360	2	1299	2564	1897	2487	3	1084	6432	2	23194	2563	3003	5645	3925	1909	2590	797	704	2309	3	3341	4923	2624	2	4507	3	2107	3372	2	3	2	3
934	4964	12271667	52	52_4964	2	2563	17738	13086	14190	33555	3	2	3	2	3	2	3	760	3590	2	3	2	3	3695	3073	793	1012	1084	925	2	3574	3	2118	2	4398	3173	4151	1126	1357	3	4948	4005	4586
935	4989	12313334	52	52_4989	2	3	2	3	2	3	2	3	2	3	2	3	2	3	2	3	2	3	2	3	2	3	2	3	2	3	2	3	2	3	2	3	2	3	2	3	1158	763	1817
936	5036	12391666	52	52_5036	2	3	2	3	2	3	2	3	2	3	2	3	2	3	36580	2	3	2	3	6087	2	3	2	3	2	3	2	3	2	29354	3	2	3	2	3	2	3	2	3
937	5034	12388333	52	52_5034	45852	35266	43509	53846	49216	55605	48764	50107	50341	2706	1937	4128	48905	3698	52417	49175	49751	3238	2487	5304	4136	2336	1747	2435	2111	1865	3633	1300	41835	46106	1692	3077	2420	1476	1133	1118	2534	3563	4024
938	5099	12496667	52	52_5099	52296	52628	54854	49685	59914	56246	39591	41775	21068	2	3	2	41490	1239	36027	43853	42596	811	1110	4108	1529	3	565	602	1190	2	1055	3	54748	50806	2	3	2	3	2	3	2	1696	848
939	5129	12546667	52	52_5129	3	2	3	2	3	2	3	2	3	2	3	2	3	2	3	2	3	2	871	3	1514	2	3	630	2	3	2	3	2	3	2	3	2	3	2	3	2	692	434
940	5170	12615000	52	52_5170	42390	42453	36254	38123	50748	46253	25699	34310	29344	3	2	3	37181	2	3	38799	32182	2	3	2	3	2	534	3	2	3	2	3	47909	40215	2	3	2	3	2	3	2	3	455
941	5357	12926666	52	52_5357	726	2	3	2	733	927	3	397	1359	493	2	3	2	3	1350	2	3	2	3	2	3	2	3	502	2	967	3	2	861	3	2	3	2	459	3	2	3	2	360
942	5447	13076667	52	52_5447	3	2	1216	3	926	2	3	429	2	3	2	3	2	3	1039	2	3	2	3	2	3	2	728	3	2	646	3	2	3	2	3	2	1146	912	3	2	669	3	2
943	5528	13211667	52	52_5528	3	2	3	2	1936	1298	3	2	3	2	3	2	3	2	3	2	3	2	3	2	3	2	3	2	3	2	3	2	1425	3	2	3	2	3	2	3	2	3	2
944	5561	13266666	52	52_5561	3	923	2	3	2516	2401	2	586	3	934	1523	1532	2	1433	2431	3	2	2358	1533	3	1847	1792	1267	1475	1969	1462	1477	2	854	1436	1649	1832	1741	1458	797	3	1832	1781	1547
945	5702	13501667	52	52_5702	4730	3702	3678	7292	11432	8325	4974	3276	2	9533	2578	8242	3108	7756	8624	3107	4999	6047	8701	5523	7118	4498	6110	6209	5992	6692	7429	8444	5651	3611	6931	7807	3913	7326	9657	5941	8403	5232	11761
946	5778	13628333	52	52_5778	3	2	3	2	1327	3	2	3	2	3	2	3	2	1958	3	2	3	2	1842	3	934	2	414	3	2	3	2	3	2	3	2	3	2	3	2	3	2	3	2
947	5821	13700000	52	52_5821	833	766	3	2	3	2	3	2	3	1661	2	623	657	1189	3596	1058	1481	1096	2380	2159	2198	882	1392	481	808	1498	1327	3	1674	1438	954	1276	2	639	3	2	871	820	751
948	5986	13975000	52	52_5986	667	3	2	3	821	2	3	2	3	2	3	2	3	581	2	3	2	3	2	3	2	3	526	2	3	2	3	2	3	2	3	2	686	3	2	3	2	3	2
949	6152	14251667	52	52_6152	3	2	1269	3	580	903	2	683	3	2	3	857	2	826	1420	3	2	1032	3	1549	2	3	880	1099	2	3	1030	2	1037	3	1247	2	713	875	3	2	1352	842	1503
950	6200	14331667	52	52_6200	744	1049	1801	3	1687	1476	1729	573	2	599	1087	1228	3	2	899	1345	2247	1771	955	1303	3	2334	1417	1764	666	2	3	819	1446	1949	2	3	786	1323	1001	1799	2	3	1289
951	7269	16113333	52	52_7269	732	2	1225	3	216	2	2460	1211	3	2	3	2	1075	3	1900	2147	2806	2	3	1964	2	3	2	3	2	506	3	2	3	2	3	2	3	2	3	2	648	3	557
952	7342	16235001	52	52_7342	2	3	2	3	277	2	3	2	3	2	3	2	3	2	704	3	2	3	2	3	2	3	2	3	2	3	2	3	2	3	2	3	2	497	3	2	3	2	3
953	7980	17298334	52	52_7980	1351	1079	3203	2230	2570	2842	4520	3601	9216	2	3	2	3627	3	3363	5572	5769	2	3	2	3	2	3	2	3	2	3	2	1046	3	2	3	2	3	2	3	2	3	2
954	46	4075000	53	53_ 46	132049	125813	153068	165099	215693	195412	154674	218284	148312	186085	141939	194935	230766	182625	174851	179603	165012	81762	185881	177643	192212	215343	210706	198445	198961	168723	201000	139900	145160	144512	139326	193731	167160	197095	213679	203322	150154	191174	201818
955	125	4206666	53	53_ 125	104562	85257	108311	3	2	135909	3	2	79605	96050	109289	138834	3	122426	121482	127727	119781	58729	127640	126558	136555	155137	149684	143788	136817	118845	141948	88422	97107	103886	103460	135718	133515	142308	149977	144208	109203	139568	144183
956	287	4476666	53	53_ 287	62014	65385	73343	63896	2	3	75672	100062	63771	2	76459	3	2	85266	3	87165	72499	26916	2	3	95076	2	3	106278	2	3	2	53938	72796	61475	72479	3	99643	2	107610	3	78242	2	3
957	361	4600000	53	53_ 361	2	53810	3	2	3	2	3	2	3	2	3	2	3	2	3	58352	2	3	2	3	2	3	2	3	2	3	2	3	2	3	46599	2	3	2	3	2	3	2	3
958	472	4785000	53	53_ 472	2	38859	3	2	3	2	3	2	16158	3	2	3	2	51271	3	2	3	2	3	49293	2	3	2	3	2	3	2	3	2	3	2	3	2	3	2	3	2	3	2
959	553	4920000	53	53_ 553	23995	31695	23157	3	2	40507	26488	3	12195	2	24638	3	2	3	2	23954	3	755	2	3	2	3	2	3	2	3	2	3	2	3	23066	2	3	2	3	2	25559	3	2
960	583	4970000	53	53_ 583	19973	29587	18560	13876	38116	35840	24081	35761	9981	16853	3	36139	25780	34447	13974	21983	12501	3096	29393	35231	33917	17499	41161	35225	2	26460	27167	6127	24501	17112	19323	35839	34395	34602	40835	35628	23986	34013	32228
961	590	4981667	53	53_ 590	3	25728	2	3	2	3	2	3	2	3	2	3	2	3	2	3	2	3	2	32027	3	2	3	2	3	2	3	2	3	11120	2	3	2	3	2	3	2	3	2
962	655	5090000	53	53_ 655	3	2	6884	638	3	2	12680	3	2	3	10051	2	3	2	3310	8906	3	2	19039	21081	3	7044	29632	2	3	2	3	2	9612	7990	8638	3	2	3	2	3	13117	19742	2
963	713	5186666	53	53_ 713	28280	26732	26182	40948	28068	23443	44387	44817	47263	20367	25967	22170	23002	25800	18130	25999	27420	18119	23411	30787	23126	19518	30330	27859	17754	18220	19335	7685	35194	25324	21281	26341	21597	23474	29726	21636	25219	27011	20211
964	809	5346667	53	53_ 809	423	3801	3	2	1356	1110	3166	7105	1777	3	344	6891	421	12467	2492	2	3633	624	3855	3	5371	5736	2	3	2	2479	506	3	2	2261	597	3	10174	2	3	2	4079	5820	635
965	818	5361667	53	53_ 818	3	2	3	2	3	2	3	2	3	2	3	2	3	2	793	3	2666	2	3	2	3	3376	2	3	2	3	2	3	2	647	3	2	3	2	3	2	3	2	3
966	882	5468333	53	53_ 882	3709	4757	3823	412	807	789	14528	10885	7772	868	2	1344	5181	5358	1677	8446	5774	1462	3	753	1226	1065	5959	874	2	1136	3	2	5208	5749	486	528	5136	588	3	1143	421	1579	2
967	924	5538333	53	53_ 924	3	2	3	352	975	2	3	2	3	2	1139	618	3	2	3	908	2	1724	3	2	3	396	2	3	464	2	860	3	2	1492	3	589	2	3	2	3	290	2	525
968	981	5633333	53	53_ 981	7366	3988	10409	5857	4170	4000	12232	10806	32671	3576	4697	3300	12433	1600	7602	12955	14138	4769	647	6700	5850	4762	4112	4788	3517	5418	5152	2328	14811	11612	6281	5068	5773	3845	4236	3412	5249	7394	5024
969	1016	5691667	53	53_1016	3	2	3	2	3	2	3	820	2	3	2	3	898	2	3	2	3	2	3	2	3	390	2	3	2	3	2	3	2	3	2	250	3	2	3	2	476	3	2
970	1063	5770000	53	53_1063	1457	3	3653	1721	3397	1560	2568	1820	2395	2	3082	2504	1233	1491	1337	2963	3463	4351	3	2	1358	3344	2691	3630	578	1505	2539	2534	4083	3564	3912	1888	3220	3276	3513	213	3605	2883	3238
971	1109	5846667	53	53_1109	1161	3	2847	1466	3359	1364	1899	1764	445	1765	2379	2551	1381	2527	1467	2362	2730	1596	2	2398	2191	4307	3082	3695	1432	1499	3103	681	3048	2886	1699	1935	2542	3018	2658	2495	2116	2498	2357
972	1175	5956666	53	53_1175	188	612	1340	553	3	604	1488	1070	2234	725	2	3	883	899	1003	1542	2378	1395	2	1548	691	3	1327	936	2	439	1552	3	1190	1340	1828	713	1279	2	1202	563	3331	1844	1507
973	1144	5905000	53	53_1144	254	3	2	3	2	3	2	3	2	3	2	3	2	3	2	3	2	3	2	3	2	3	2	3	2	796	3	2	3	2	3	526	2	3	2	3	2	3	2
974	1219	6030000	53	53_1219	1798	1749	3627	2158	2537	1720	4646	3518	5014	1470	1728	2242	2670	1421	5653	5058	6249	3151	1446	3161	6114	3875	2791	3667	2306	3708	4735	2435	2698	1869	4069	4105	4901	1384	3140	2346	3	5870	5197
975	1252	6085000	53	53_1252	2	1604	3	665	2	3	2	3	2	3	2204	2	3	2	2438	3	2	194	3	1256	2706	1893	1350	2	3	1810	2750	796	2	2571	1777	2009	3	2	3	2	298	3098	3
976	1296	6158333	53	53_1296	2	3	2	3	2	3	2	3	2	3	2	3	2	3	2	3	2	3	2	375	3	2	3	2	3	2	3	2	3	2	3	2	3	424	363	2	3	2	3
977	1297	6160000	53	53_1297	982	1319	1138	481	865	2	5948	5077	3019	3	479	2	549	819	1366	1511	780	535	3	1037	711	575	936	2	3	956	694	519	2013	1970	1404	2	991	995	1152	310	458	658	1357
978	1367	6276667	53	53_1367	424	882	1291	716	3	1144	596	531	493	902	1004	1063	920	2	1276	997	501	3	2	1074	987	1752	789	667	3	1603	222	2	971	1457	3	1015	2	3	2	432	3	892	2
979	1365	6273334	53	53_1365	3	2	3	143	2	3	2	578	3	2	3	2	3	2	3	2	802	3	2	3	2	886	3	2	3	2	3	2	3	407	2	3	2	3	2	3	2	921	3
980	1421	6366667	53	53_1421	12523	11727	10515	64098	42606	26664	9331	6103	3285	32087	25651	22611	2957	374	4299	3858	3609	575	970	984	1794	621	730	2383	1498	2499	2	387	42744	41703	1546	1518	1711	654	1190	376	3	1927	1756
981	1482	6468333	53	53_1482	513	842	2	3	920	2	3	2	3	2	3	2	3	2	3	2	280	3	2	3	2	3	2	471	3	2	3	2	739	3	2	3	2	3	552	2	3	2	3
982	1528	6545000	53	53_1528	523	560	2	694	762	561	1092	3	2	491	321	546	443	693	3	2	579	564	419	3	2	3	2	716	3	1023	422	2	465	917	3	520	849	2	402	715	886	756	468
983	1560	6598333	53	53_1560	149	3	2	3	2	959	438	345	3	2	459	3	319	2	3	2	486	3	409	2	3	2	508	3	2	3	201	314	704	367	2	3	450	468	2	3	2	403	342
984	1638	6728333	53	53_1638	1318	1056	2393	562	847	3	2	3	2	989	1104	3	2	3	2432	1985	3214	2	1502	1731	2196	1355	3	1566	2	2106	1150	572	2243	2084	1551	2071	1396	3	2	1565	1659	1952	1370
985	1671	6783333	53	53_1671	5568	4925	8387	294	1830	1018	15075	15130	27254	526	906	1214	11050	651	3179	12728	11778	662	1900	2041	1798	800	1344	1183	1008	2760	1536	1597	11863	8722	3712	1789	1866	1031	980	971	5587	4333	4418
986	1709	6846667	53	53_1709	3	2	3	2	3	2	3	2	3	2	3	2	3	2	3	2	3	2	3	2	3	2	3	511	2	1119	2181	3	2	3	1852	2	3621	509	885	3	2	3296	1332
987	1743	6903333	53	53_1743	3	703	3504	413	1837	1666	1600	917	2	3	2634	1496	2	3	1967	2950	3269	255	1220	2	1678	2184	1179	1865	1019	1196	2332	715	2791	2506	3548	2451	3941	1713	1315	365	3563	3066	3063
988	1778	6961667	53	53_1778	2314	2406	2945	273	3	2	483	3	445	527	1471	1139	728	1388	998	2	3	1905	3160	1016	2632	3211	2406	3844	2650	5962	7553	4730	2449	3422	5912	7596	11397	3540	4275	6559	8248	9052	12369
989	1815	7023334	53	53_1815	2	479	480	3	2	3	2	3	2	3	282	2	3	2	3	2	3	2	315	321	3	2	3	315	2	715	450	3	2	523	3	2	938	3	2	3	2	3	618
990	1883	7136667	53	53_1883	2	2654	3042	2660	3363	2032	2204	2454	1877	1968	2997	3247	2025	1530	4142	2635	3057	1972	3325	2705	3667	3226	2770	3132	3649	3472	2759	2065	5496	3195	1943	3080	2983	2581	2189	3085	1348	3262	3129
991	1961	7266667	53	53_1961	1502	1653	2909	528	3	1454	940	1802	2221	2	2224	3	2654	1000	7728	3857	4037	1713	975	4103	7728	1653	1394	2	3787	10113	3100	1596	3474	3066	3980	9156	4472	891	1149	1446	3402	5320	4059
992	1994	7321667	53	53_1994	4122	3323	5253	2335	801	1578	11490	11698	22694	1883	2022	1327	6008	2157	5713	10524	10131	2722	3587	3413	6285	1743	1530	1051	1942	3931	3146	2292	8277	5402	2385	2986	2740	1354	1693	2268	2352	4087	2340
993	2002	7335000	53	53_2002	3	2	3	2	3	2	3	2	909	3	2	1881	3	2	3	2	3	295	2	1398	3	2	3	1975	2	3	2	3	2	3	2	3	2	3	2	428	1046	3	1178
994	2060	7431667	53	53_2060	428	2	3	354	2	3	2	3	2	3	142	2	2899	3	547	2	378	3	2	450	3	2	3	2	3	2	210	3	2	3	721	383	2	3	2	3	3092	2	3
995	2122	7535000	53	53_2122	2	697	3	2	3	2	3	2	3	2	3	7328	12923	2	12612	17688	3	4778	6243	9284	12836	4696	5072	5118	8138	14075	8609	4749	2	3	10736	13419	11473	4532	5565	2	9635	12619	10710
996	2151	7583333	53	53_2151	21310	14329	20033	29620	22768	24157	16407	14964	26833	27880	19207	19971	15480	14189	10900	11991	16339	13800	18773	16236	18373	18338	16673	9737	16434	17595	17799	14712	24672	14799	15747	17799	10027	16484	16453	18454	12155	17385	18244
997	2181	7633333	53	53_2181	17394	17665	20856	3	20063	16147	14341	12833	18896	15507	2	3	2	5488	19484	19693	20874	3672	6816	3	6951	2	6653	19389	3	2	3	2	3	2	15539	6192	18327	4068	7254	5463	15790	3	6436
998	2277	7793334	53	53_2277	2701	2944	4195	1045	1943	1628	3856	3443	3407	766	1644	1355	2823	1245	5009	6076	5504	1206	2151	2753	5362	1860	1510	2053	2043	5042	5551	1061	1773	2171	5689	5611	6899	1630	1893	1863	5696	6202	5802
999	2328	7878334	53	53_2328	1842	2	1689	1340	2488	2433	2288	2670	1551	984	1792	1794	1354	1094	3165	2828	3032	1120	1399	2992	2836	2003	1821	1755	2045	2752	3	420	1691	1437	2062	2266	2195	2048	1700	1522	1143	2716	2020
1000	2366	7941667	53	53_2366	2	3	2	3	1296	999	2	3	2	1120	1185	3	2	907	3	2	3	2	3	1711	2	3	1344	2	3	2	3	2	1560	1323	1495	3	2	1489	1138	3	2	1979	3
1001	2369	7946667	53	53_2369	1732	1468	1500	2579	2968	1671	5808	5621	6275	2037	2904	1376	1082	601	2461	2166	1908	2138	1696	911	2054	1343	1069	1714	2247	2303	1613	1598	3762	3505	1913	1581	2502	1142	1319	1771	1817	2278	1660
1002	2412	8018333	53	53_2412	1912	2007	2011	2	3	2	2284	972	3	2	3	2373	237	2	2394	2181	2411	576	1554	3	1798	1459	2	2070	1321	1529	1533	263	3	2	3	1564	2	3	2	1054	3	2	3
1003	2496	8158334	53	53_2496	754	751	911	4265	5544	3190	4038	3387	2299	1951	2805	1479	225	2	834	1728	1535	402	432	593	682	317	3	1278	2	917	661	3	5085	4087	1629	423	1276	2	401	338	1324	824	294
1004	2502	8168333	53	53_2502	3	737	2	387	3	2	3	2	3	2	3	540	359	2	3	2	3	2	3	452	406	2	3	2	3	2	550	3	2	1084	3	2	3	2	3	2	3	2	3
1005	2552	8251667	53	53_2552	501	2	656	3	2	3	701	565	2	3	2	259	703	3	1686	1019	560	223	2	1444	2154	3	2	3	2	2437	1668	375	3	2	1264	1894	1507	3	366	2	1228	1242	1396
1006	2599	8330000	53	53_2599	5984	5346	6391	2366	2416	2139	8708	7511	8655	2608	2533	3070	8430	2008	14234	10331	9708	2343	3480	10481	13889	2849	2290	2854	3875	15125	10000	2383	3521	1178	8386	12553	11133	2138	2831	3	8589	10252	9970
1007	2640	8398334	53	53_2640	2752	1779	2903	2	915	937	6981	6792	13785	404	1701	1136	6908	3	1359	6957	6970	2	707	282	3	1146	2	837	1468	3	1124	2	4158	1239	1064	1385	1569	819	773	657	1289	1851	850
1008	2692	8485000	53	53_2692	616	422	3	383	2	3	2	3	2	642	3	2	949	3	2	3	2	376	3	2	937	3	2	3	2	843	3	390	2	3	2	3	2	3	2	3	2	3	2
1009	2730	8548333	53	53_2730	3	193	2	3	2	3	2	3	2	3	2	3	2	3	2	3	2	3	2	3	2	3	2	3	2	216	3	2	3	2	3	2	3	2	3	2	273	3	2
1010	2762	8601666	53	53_2762	1598	1361	1154	1332	1450	843	1752	1627	1803	867	1425	1568	1852	756	3657	2079	1968	474	1333	2226	3434	1202	637	1109	953	3094	1977	371	1520	1348	1517	2233	1574	866	799	887	1396	2154	1835
1011	2826	8708333	53	53_2826	844	552	662	1003	725	3	756	791	2	751	600	775	1071	934	1730	1390	881	505	996	1012	1090	618	673	883	992	681	756	605	888	884	607	840	681	636	787	907	638	765	1085
1012	2861	8766666	53	53_2861	3	124	2	3	2	3	2	3	2	3	2	3	2	3	2	3	2	3	2	280	3	2	3	2	3	247	2	3	2	3	2	3	2	3	2	3	2	3	331
1013	2941	8900000	53	53_2941	701	350	475	821	534	974	547	2	3	746	392	2	479	543	1452	964	563	490	243	898	987	3	687	466	2	1446	645	960	3	322	806	1202	926	417	674	380	522	928	731
1014	3067	9110000	53	53_3067	288	391	2	232	3	2	557	487	908	3	2	3	1080	2	3	2	628	452	418	637	493	632	480	406	3	193	253	600	2	472	3	345	2	452	831	1197	3	2	3
1015	3091	9150000	53	53_3091	2	146	3	220	194	2	287	401	575	3	2	3	400	2	3	2	482	3	204	2	3	2	3	2	3	189	2	3	2	3	2	359	3	2	230	3	2	3	2
1016	3154	9255000	53	53_3154	315	273	3	576	613	2	519	3	2	580	369	378	757	517	1077	3	249	681	2	3	770	2	3	492	2	3	425	282	902	447	2	3	2	3	2	663	341	3	432
1017	3230	9381667	53	53_3230	2	3	2	3	2	3	399	2	644	3	246	2	307	3	1576	2	431	3	382	799	1459	523	2	3	2	1540	819	3	566	366	2	963	1067	3	2	495	221	850	876
1018	3270	9448334	53	53_3270	1542	1273	959	1052	1251	835	473	666	807	1101	1541	1414	331	1294	2318	942	1354	943	2198	1785	2450	1779	2045	1592	758	2444	2037	1075	1398	679	1397	2217	2337	1371	2399	330	1502	1748	2468
1019	3317	9526667	53	53_3317	132	214	3	881	997	2	1223	1148	2052	933	419	736	568	393	587	3	563	2	712	3	401	2	3	434	2	467	3	276	441	2	3	2	3	393	641	448	2	3	503
1020	3364	9605000	53	53_3364	1824	1493	1923	4105	2817	3048	4035	3220	5293	4104	3126	3030	3883	410	4724	4319	3997	458	1520	2884	4162	2	3	476	2426	3510	716	1275	2074	1567	1026	2799	857	2	841	1388	814	2734	1109
1021	3413	9686666	53	53_3413	2654	2364	2371	1555	1645	1481	801	970	3	1718	2	918	2345	1202	3296	2091	2114	778	1414	2777	3874	1476	1042	3	1644	4736	2591	1815	1680	1466	1994	3597	2233	1213	2	1684	2341	2477	3003
1022	3477	9793333	53	53_3477	3	467	2	183	459	667	3	2	3	386	2	3	2	564	3	1192	767	2	617	3	2	3	636	744	1006	2	3	566	534	965	843	2	1451	667	801	3	1155	2	3
1023	3526	9875000	53	53_3526	2	3	2	204	3	2	338	3	2	3	140	2	196	3	2	3	209	2	3	2	3	2	3	2	3	241	2	3	2	3	2	3	2	3	2	3	2	3	2
1024	3586	9975000	53	53_3586	2287	1764	1579	2431	1055	568	205	338	3	1302	1040	1382	1230	1465	2522	1115	1343	1275	2213	2388	2820	1920	1574	2053	2079	9977	4731	1669	986	1032	5149	661	5382	1477	1756	1791	6106	6572	5511
1025	3627	10043333	53	53_3627	586	215	2	3	621	980	2	3	2	449	266	3	348	399	2	3	223	2	378	203	3	2	3	379	2	245	3	2	3	2	3	381	2	3	2	434	3	2	3
1026	3686	10141666	53	53_3686	189	211	2	3	2	3	2	3	2	3	148	2	3	2	3	2	3	2	3	2	3	2	3	2	3	2	3	2	3	2	3	2	3	2	3	2	3	2	3
1027	3720	10198334	53	53_3720	369	527	481	155	270	2	3	2	652	3	445	2	733	3	987	2	294	703	277	534	932	3	2	327	553	1466	575	308	3	2	583	738	842	3	508	567	724	800	1199
1028	3772	10285000	53	53_3772	548	421	331	211	2	629	890	945	2325	3	2	3	4703	2	5913	3239	3809	3	580	3676	4992	2	3	2	1068	3	2	3	2	468	3	554	3711	2	3	314	2	3417	3
1029	3810	10348333	53	53_3810	2	3	2	3	2	3	1610	1795	2431	2	3	2	2595	3	2	2073	3	2	3	2	3	2	3	2	3	2	3	2	3	2	3	2	3	2	3	616	2	3	2
1030	3810	10348333	53	53_3810	1572	1407	1180	1356	1532	1634	6998	6411	10854	2748	1258	1199	1973	691	4769	1737	2119	1540	1839	4012	4982	1209	1438	856	3	5663	3725	1584	1612	1729	2941	5010	383	1103	1090	317	3209	2	3932
1031	3887	10476666	53	53_3887	160	3	2	3	2	3	2	3	2	3	2	3	2	3	2	3	2	3	2	150	3	2	3	2	3	2	3	2	3	2	3	273	2	3	2	3	2	3	345
1032	3934	10555000	53	53_3934	2	3	265	299	2	3	529	308	752	294	2	3	493	2	685	3	432	2	3	651	509	2	3	2	3	593	684	299	2	3	2	3	2	3	515	2	3	2	3
1033	3977	10626667	53	53_3977	2	600	1025	852	623	802	1142	1041	1471	856	422	593	1675	405	2314	1144	1411	540	635	1877	2102	662	478	449	744	2226	1488	646	631	562	1127	1795	1335	3	643	747	1381	1319	1494
1034	4027	10710000	53	53_4027	765	554	605	534	685	598	968	2	1362	745	470	482	1129	422	1724	834	3	541	751	1318	1384	510	595	355	2	1621	1185	545	447	459	782	1053	998	459	685	3	608	1006	819
1035	4100	10831667	53	53_4100	4145	3619	4154	2338	2635	2390	1509	1673	1999	2126	2640	2212	2459	2337	2345	2149	1748	2380	1836	3538	3601	2463	2831	2528	1884	4131	3278	2159	2950	2651	6810	3297	2796	1725	2650	1666	2785	2244	3963
1036	4160	10931666	53	53_4160	141	2	3	2	3	2	3	2	3	2	3	2	3	2	3	2	3	2	3	185	428	2	3	2	3	2	325	3	2	3	2	3	2	3	2	3	2	3	2
1037	4202	11001667	53	53_4202	312	581	689	1389	862	883	476	647	1123	829	685	767	814	778	1811	1342	752	705	959	998	1536	695	915	408	767	2094	1456	495	763	651	1084	1706	1537	528	798	1193	1035	1205	1576
1038	4233	11053333	53	53_4233	474	3	2	680	640	3	2	3	2	3	733	743	2	817	3	2	3	2	951	3	2	773	926	3	2	3	2	829	789	1084	3	2	3	664	961	501	2	3	2
1039	4290	11148334	53	53_4290	406	274	3	224	2	3	2	3	1051	2	3	2	978	3	708	2	264	201	3	511	683	2	3	2	3	871	649	278	2	3	2	764	353	3	222	2	241	3	505
1040	4329	11213333	53	53_4329	2	3	2	3	248	2	3	2	3	333	2	3	885	2	3	2	3	2	3	2	3	2	3	2	3	2	3	2	3	2	3	2	3	2	3	2	3	2	3
1041	4407	11343333	53	53_4407	193	2	3	428	182	2	3	2	3	467	2	3	289	367	2	3	494	2	313	416	454	3	2	238	394	716	182	561	3	2	3	450	2	3	2	363	413	479	323
1042	4416	11358334	53	53_4416	3	2	3	2	3	2	3	2	3	2	3	2	3	2	503	3	2	3	2	3	2	3	2	3	2	399	3	187	2	3	2	238	3	2	3	2	3	2	3
1043	4455	11423333	53	53_4455	2138	1800	1796	1084	916	986	1557	1473	2334	916	689	873	2635	939	5446	2255	2337	733	1372	4045	5384	930	892	1024	1615	6769	4413	1052	789	867	4381	5775	4597	726	1292	1202	5184	4317	5129
1044	4511	11516666	53	53_4511	2	3	2	3	2	3	2	3	2	3	173	2	3	2	3	2	3	2	317	3	927	2	3	217	2	1549	753	3	2	3	695	2	521	3	2	3	927	653	2
1045	4541	11566667	53	53_4541	2906	2066	1882	1446	805	1499	816	564	1784	2721	1883	1861	1563	1974	3401	837	794	2357	3281	2513	3947	2150	2574	2377	913	4900	2886	3432	1586	1715	2682	4045	2750	1621	3155	396	2630	2916	3225
1046	4584	11638333	53	53_4584	209	3	2	3	796	1136	2	3	2	3	191	501	2	3	2	3	2	3	2	306	3	2	3	328	2	3	2	3	518	413	2	584	3	2	258	3	2	3	2
1047	4628	11711667	53	53_4628	238	241	3	363	461	2	3	2	3	484	2	3	218	2	651	3	2	3	421	447	852	2	3	2	3	2	3	214	2	3	2	3	2	477	3	491	2	3	2
1048	4673	11786667	53	53_4673	1352	1151	1005	980	463	808	1716	1307	1467	1517	1038	1084	1475	1225	3136	1408	1172	1374	1729	2359	3075	1381	1200	1177	945	3600	2091	1961	1127	990	2743	4069	2259	1264	1876	1930	3457	2780	3000
1049	4716	11858334	53	53_4716	3	2	3	2	3	2	1302	3	2	3	2	3	2	3	629	2	3	2	3	566	2	3	2	3	2	369	3	2	3	2	3	481	2	3	2	3	409	2	3
1050	4750	11915000	53	53_4750	799	710	680	602	592	2	1285	1068	1302	740	529	617	1078	471	1583	1245	1211	685	472	1358	1515	409	3	643	2	1645	995	467	3	655	1120	1459	1109	416	711	1071	1398	1030	1278
1051	4840	12065000	53	53_4840	2	3	2	1327	3	2	3	2	3	2027	548	2	3	2	3	2	3	2	3	2	3	2	3	2	3	2	3	1448	2	3	2	3	2	3	2	3	2	3	2
1052	4880	12131667	53	53_4880	3	2	3	3786	2169	2	3	2	3385	5359	2021	2630	3868	2048	3	2	3	2610	3630	2	4016	2330	2212	1466	1567	5073	2694	4517	3895	2609	3	4534	2	1986	2893	420	3	2	3454
1053	4864	12105000	53	53_4864	5237	4159	5288	4514	4276	3146	10282	2719	3368	5878	1543	3777	3923	5179	8260	3798	4223	2588	4959	5626	4232	2507	2844	3385	3740	4700	4786	4547	2487	1775	3216	4738	2719	3570	5079	4651	3379	3493	8422
1054	4992	12318334	53	53_4992	3529	2798	2269	7247	5938	6315	3	2	3	2	3	2	3	2	5538	3	551	144	2	3	2	3	2	3	2	3	2	3	2030	1532	3770	2	3046	3	2	3	4270	3329	2
1055	4951	12250000	53	53_4951	7456	6139	7176	8283	8398	6565	257	1774	3	7348	2428	5520	2	6597	6717	599	5117	4742	5643	3462	5684	3770	4709	4938	4835	6389	5841	5074	4365	3385	4378	5486	2972	4868	6072	5494	5028	3401	10957
1056	5037	12393333	53	53_5037	16903	14762	15964	7905	3	2	3	2	3	2	3	2	3	2	3	2	3	2	3	2	3	2	3	2	3	2	3	2	3	2	3	2	3	2	3	2	3	2	3
1057	5071	12450000	53	53_5071	13927	15361	13893	21794	17000	21108	14148	16283	19410	4970	1858	2841	17144	4163	16642	12677	16445	2576	2777	16098	1919	2	1603	1885	2165	1046	3	1513	15632	15584	1186	3050	1793	990	1257	2230	1936	2329	3319
1058	5112	12518333	53	53_5112	2	13354	3	14438	13764	13283	18097	20155	21002	1168	473	730	18491	980	21387	19341	21592	599	421	9013	1175	2	3	206	641	857	541	281	14462	17781	2	346	3	2	280	394	452	675	3
1059	5158	12595000	53	53_5158	12432	2	3	16232	13613	14057	8933	10308	2	3	577	2	3	2	1274	7580	10944	3	464	386	2	3	2	3	2	3	338	2	3	1466	2	446	3	2	3	783	2	3	2
1060	5186	12641666	53	53_5186	3	289	2	3	2	3	10468	11829	12145	2	3	2	9603	3	2	10221	13416	3	180	2	3	2	3	2	3	897	2	3	2	3	2	308	3	2	3	2	3	2	3
1061	5238	12728333	53	53_5238	187	2	3	605	2	464	2099	1862	3	631	178	2	1116	3	2	3	2	3541	3	2	3	2	3	2	3	343	2	282	3	635	2	3	2	3	2	445	3	2	795
1062	5288	12811666	53	53_5288	3	2	3	2	3	2	3	2	3	2	3	378	2	647	3	2	3	368	2	3	2	3	2	3	2	3	2	3	2	3	2	3	2	3	445	2	3	2	3
1063	5297	12826667	53	53_5297	497	593	473	773	819	2	630	593	1633	888	270	545	872	842	1574	1051	1427	468	793	1149	1107	3	2	285	3	1268	555	405	2	289	421	498	517	548	720	602	400	3	1109
1064	5356	12925000	53	53_5356	454	398	481	874	1113	914	304	2	1035	3	266	310	701	514	490	2	3	419	450	300	2	3	2	342	3	261	2	3	495	419	2	3	2	3	407	2	529	3	2
1065	5358	12928333	53	53_5358	3	2	3	610	644	2	3	2	3	2	3	2	3	2	3	2	203	3	2	3	2	3	2	3	2	3	2	3	2	3	2	3	2	3	2	3	2	3	2
1066	5443	13070000	53	53_5443	418	187	500	3	415	2	816	3	398	502	467	314	280	2	457	3	524	417	448	432	441	300	2	3	2	509	461	3	2	531	625	284	593	3	2	464	467	3	2
1067	5525	13206667	53	53_5525	3477	2831	3265	4691	4024	4313	4300	3331	3877	4005	3390	3227	3541	2789	4831	3375	4540	6877	3100	3543	3650	2736	3040	2962	4784	4294	2924	3459	3917	3768	3869	3564	4038	2706	2671	3701	3349	3616	3607
1068	5562	13268333	53	53_5562	3	2	3	2709	2125	2368	2	3	2	414	3	2	3	2	3	2	187	3	2	3	2	3	2	3	2	3	2	203	937	474	3	2	3	2	308	3	2	3	2
1069	5646	13408334	53	53_5646	3	2	3	2	3	2	443	431	3	2	3	2	450	3	296	2	642	3	2	347	3	2	3	2	3	466	230	2	3	2	3	2	3	2	3	2	3	2	3
1070	5701	13500000	53	53_5701	45334	29259	24689	93475	79442	58164	32020	35036	58991	86817	18904	57625	68347	66871	65826	29436	37009	44100	64487	34742	50966	28915	39345	44911	50147	56406	55444	67118	39111	27089	42162	56771	26936	49466	67247	69878	51218	27584	98216
1071	5779	13630000	53	53_5779	1439	1020	647	1074	633	656	401	819	1345	1181	164	680	2070	2460	1772	2	1277	1813	2377	1033	1508	3	678	622	1648	2349	1610	2	1072	1014	1202	1734	710	3	471	2	1185	3	1082
1072	5817	13693334	53	53_5817	1643	1421	1156	3032	2173	1680	1006	773	1466	2893	550	1775	2864	1493	3814	2402	2900	1476	2111	2563	2815	822	1633	1314	1082	2998	2107	1444	1873	2111	1455	1782	747	975	1571	1534	921	592	2535
1073	5821	13700000	53	53_5821	2	3	2	150	3	2	3	2	3	2	3	2	3	2	3	2	3	2	3	2	3	2	3	2	3	123	2	3	2	3	2	3	2	3	2	278	3	2	3
1074	5927	13876667	53	53_5927	2	3	2	147	214	3	2	3	2	3	2	3	2	3	2	3	2	3	2	3	2	3	2	3	2	3	196	2	3	2	3	2	3	2	3	2	3	2	3
1075	6009	14013333	53	53_6009	488	204	2	3	263	2	271	380	440	3	2	3	2	3	2	848	619	3	2	3	2	3	2	3	2	3	154	2	3	2	3	2	3	2	3	2	3	2	3
1076	6152	14251667	53	53_6152	2372	1805	1949	2558	1566	2238	1854	1680	2939	2488	1042	1557	3050	1898	2910	1664	2285	3553	2170	2306	2096	1429	1696	1550	2395	2465	1703	2529	1907	1669	1743	2242	1241	1525	1813	2216	1883	1647	3053
1077	6191	14316667	53	53_6191	18063	11196	9828	26919	11479	22035	15428	16020	29179	20309	6804	9672	30762	10712	10031	13057	19229	16184	17317	7201	5940	15026	11826	10719	5929	7636	4491	24257	10169	14470	3794	6963	1927	10966	10285	21190	3621	2849	9749
1078	6236	14391666	53	53_6236	1782	1238	1320	2740	1678	2022	1930	1759	2846	2115	1456	1344	2565	1277	1779	1857	2035	2676	1408	1228	1323	1282	1293	1332	1718	1676	1005	2002	1599	1564	2	1273	1093	1147	1122	1819	1160	820	1151
1079	6355	14590000	53	53_6355	199	163	3	1263	2	3	2	3	489	936	2	3	2	390	3	2	3	171	2	260	3	2	3	215	2	179	233	357	3	2	3	2	3	2	3	243	2	3	2
1080	6428	14711667	53	53_6428	3	2	3	2	242	3	2	3	2	3	2	3	2	3	2	3	2	3	2	3	2	3	2	3	2	3	2	3	2	3	2	3	2	3	243	213	2	3	325
1081	6572	14951667	53	53_6572	2	3	2	282	204	3	2	3	2	3	219	2	3	2	3	2	3	358	2	3	2	3	2	3	2	3	2	3	2	3	2	3	2	3	2	3	2	3	2
1082	6653	15086667	53	53_6653	3	2	3	2	3	2	320	353	3	2	3	2	212	3	2	3	2	3	2	3	2	3	2	3	2	3	2	3	2	3	2	3	2	3	2	3	2	3	2
1083	6712	15185000	53	53_6712	194	3	2	698	239	3	2	3	2	594	3	2	211	3	2	3	2	202	187	3	2	3	2	3	2	3	2	413	3	2	3	2	3	2	335	268	3	2	364
1084	6785	15306666	53	53_6785	3	2	3	309	2	3	2	3	2	3	2	3	270	2	263	3	2	3	2	3	2	3	2	3	2	141	3	237	2	3	2	3	2	3	2	3	2	3	2
1085	6846	15408334	53	53_6846	135	3	2	1890	3	2	3	2	1711	839	3	2	1019	3	556	2	432	315	3	2	3	2	3	2	3	262	2	1153	3	2	3	2	3	2	3	396	2	3	2
1086	6936	15558333	53	53_6936	570	499	477	3	2	3	2	3	2	3	2	3	213	2	336	3	2	155	3	268	2	3	2	3	2	352	223	3	2	3	2	286	3	2	3	2	314	3	348
1087	7005	15673333	53	53_7005	287	331	2	598	306	3	256	367	594	444	2	3	371	2	469	3	338	397	282	351	254	2	3	2	3	428	2	577	3	2	3	240	2	3	2	351	321	3	523
1088	7104	15838333	53	53_7104	1517	783	661	1986	412	769	545	2	2374	1455	274	448	825	503	1185	3	333	905	826	317	851	2	756	260	922	912	377	1680	934	372	594	1123	721	461	702	908	986	542	834
1089	7268	16111666	53	53_7268	2469	1942	2457	683	458	642	4707	3591	5386	753	267	579	6394	416	7610	5969	7165	843	541	5685	4957	546	3	362	1700	7418	4484	1040	2	566	5672	5946	4876	3	457	668	6022	4539	4930
1090	7342	16235001	53	53_7342	743	639	784	947	2	3	995	988	1574	629	2	3	1899	2	2880	1726	2249	906	268	2114	1899	3	2	3	565	3178	1641	571	2	3	2163	2357	1907	2	3	359	2548	1607	1975
1091	7938	17228333	53	53_7938	261	2	3	401	2	3	2	3	650	273	2	3	425	2	3	2	3	408	2	3	2	3	2	3	2	206	3	521	2	3	2	241	3	2	3	257	2	3	2
1092	7976	17291666	53	53_7976	4629	3327	5042	5736	3013	4696	19513	17802	27428	1340	898	411	19991	3	11601	17778	20790	2	3	5245	2	3	2	3	2	312	3	2	3433	3	2	3	2	3	2	3	2	3	2
1093	8101	17500000	53	53_8101	3	2	3	330	1219	2	302	3	454	855	2	3	510	2120	2	3	321	2	3	2	3	2	3	2	3	196	2	274	3	2	3	2	3	2	3	378	2	3	2
1094	8558	18261667	53	53_8558	3	2	3	2	3	2	3	2	3	2	3	2	3	2	3	2	3	355	272	2	3	2	3	2	3	2	3	442	2	3	2	3	2	3	2	3	2	3	2
1095	8649	18413334	53	53_8649	3	2	3	2	3	2	3	2	3	2	3	2	3	2	3	2	3	259	2	3	2	3	2	3	2	3	2	365	3	2	3	2	3	2	306	3	2	3	2
1096	29	4046667	54	54_ 29	12084	11402	7249	8795	6320	8467	8056	6801	179	9804	9824	8329	6171	8823	9015	3	8214	12409	2	9919	8396	8287	7253	8389	9692	9266	8190	433	9786	9450	10747	9032	9432	8068	7697	8572	9246	8456	8803
1097	84	4138333	54	54_ 84	3	2	3	2	3	2	2347	1610	3399	3	2	3	2	3	529	1041	2	3	2	774	3	2	3	174	320	2	3	2	3	2	3	2	3	2	3	2	3	2	3
1098	137	4226666	54	54_ 137	10569	9157	14195	3360	4318	4183	8208	5349	6658	5496	10511	6952	6508	8454	7275	9162	9770	12070	12343	6464	11546	13869	12359	13924	8462	19602	25894	18079	10498	14750	20864	25027	31736	13627	15246	19034	23964	23975	28708
1099	194	4321667	54	54_ 194	2210	2339	4045	2329	2462	2497	3137	2842	3544	2182	2290	2326	3124	2139	3405	3437	2991	2431	2803	3097	3429	2663	2467	2707	2526	3181	3097	2308	2917	7829	3231	3144	3242	2613	2415	2863	3226	2803	2867
1100	236	4391667	54	54_ 236	2	3	2	3	2	318	3	2	220	3	2	338	3	2	3	2	3	2	3	393	2	3	302	2	196	503	3	2	3	2	3	2	3	2	3	411	2	3	571
1101	269	4446667	54	54_ 269	1140	1207	2490	2475	2942	2137	2389	1855	3304	1932	3052	1885	2128	909	2079	2506	2450	2254	2242	1934	1966	1899	2153	2070	1642	2193	2383	2499	2749	2368	2387	1941	2719	1816	1791	1860	2711	2002	2285
1102	309	4513333	54	54_ 309	1607	1910	2659	2139	4946	2644	3066	2434	1522	2246	2940	3507	1623	2594	2610	3655	3381	1642	2561	1968	2829	3038	3326	3744	2151	2615	3014	1106	3467	2672	3067	2455	3723	3085	2470	1639	3620	3039	3506
1103	371	4616667	54	54_ 371	2	3	2	3	2	3	316	2	3	2	3	2	3	2	3	2	3	2	3	2	311	3	2	105	3	2	3	2	3	2	3	2	3	223	2	3	2	3	2
1104	416	4691667	54	54_ 416	479	532	613	361	613	607	689	630	473	284	588	542	702	535	754	582	987	505	450	515	810	625	752	470	553	445	589	322	339	850	668	699	718	3	495	2	875	505	1011
1105	486	4808333	54	54_ 486	706	628	836	283	295	345	351	3	600	314	2	3	579	2	687	3	2	275	3	2	632	3	2	132	265	803	3	2	335	3	589	569	461	258	2	3	427	2	432
1106	556	4925000	54	54_ 556	527	557	874	559	521	3	462	2	3	2	3	2	3	2	3	2	3	2	3	2	591	3	2	200	3	2	3	2	735	4586	3	2	3	198	2	3	2	450	3
1107	586	4975000	54	54_ 586	1191	1195	1857	3824	5556	4103	2416	1466	496	1859	2658	2082	1774	1288	1742	1643	1405	1358	1652	1311	1771	1393	1133	1314	798	1076	1089	849	4495	3979	1480	938	1251	1015	916	1011	1669	1404	1105
1108	653	5086667	54	54_ 653	163	2	3	2	3	2	3	2	3	2	3	2	3	2	3	2	3	2	383	3	2	3	2	287	406	3	2	3	2	3	2	3	2	3	2	3	2	3	378
1109	686	5141667	54	54_ 686	283	2	282	191	3	2	586	3	148	2	197	3	2	3	2	3	2	3	2	3	2	3	2	163	3	201	2	3	1049	584	316	2	357	3	2	3	2	3	2
1110	717	5193333	54	54_ 717	6027	4219	5049	8074	5786	4954	8166	7220	9394	3969	3647	1669	3984	2233	3785	4142	5176	560	3386	5159	2923	1956	1895	2849	2197	2939	3009	1879	7988	4237	4149	3311	3610	1676	2273	1484	3123	3557	2293
1111	757	5260000	54	54_ 757	174	3	2	3	222	283	280	250	550	2	3	2	3	2	3	2	3	2	282	3	2	3	2	3	401	563	2	3	2	3	2	3	2	3	2	3	206	2	3
1112	857	5426667	54	54_ 857	2	3	365	2	3	3130	2	3	2	3	2	3	2	668	3	2	3	1878	2	822	3	2	3	2	3	2	3	477	2	3	2	3	2	3	660	2	3	2	3
1113	881	5466667	54	54_ 881	3097	4149	3859	3138	7284	1864	11120	8816	5701	3348	2890	5010	4856	3292	3295	6677	4565	3885	3287	2636	3527	4165	4312	5140	2667	3216	4411	1389	2	2858	3720	2540	3635	4023	2793	2692	3741	2919	5755
1114	904	5505000	54	54_ 904	3	2	3	2	3	2	3	2	3	2	3	2	3	2	659	3	2	3	2	3	1014	2	923	3	2	1093	1079	3	2	3	2	682	1115	859	3	793	2	1122	1109
1115	931	5550000	54	54_ 931	704	3	2	3	2370	2	2343	1317	1292	1622	3	2	1373	506	931	1632	1512	3	2	933	1157	900	762	996	804	1107	766	700	4074	3	1274	920	1045	644	674	961	1039	1180	990
1116	980	5631667	54	54_ 980	4217	2	1961	1624	1566	1463	13118	13432	23360	1499	3649	2401	10194	1391	4191	9549	8606	1635	923	2874	2805	623	1291	792	1781	3114	1782	903	8900	4694	2441	1781	1994	986	1502	2537	2173	3831	1868
1117	991	5650000	54	54_ 991	3	1848	2	2704	3	2	3	2	3	2	1568	1016	3	2	3	2	3	2	1771	3	2	1094	3	1338	2	3	2	3	2	5790	3	2	3	2	3	2	3	2	3
1118	1060	5765000	54	54_1060	728	362	810	818	984	1132	886	725	876	940	850	892	727	789	908	919	971	1063	777	527	733	867	956	959	904	856	603	1289	1260	880	1166	907	884	1085	1236	738	1008	722	682
1119	1111	5850000	54	54_1111	646	982	920	709	1046	517	1359	584	798	719	887	936	925	742	581	786	636	806	681	2	609	1128	807	1015	402	269	701	3	1137	1131	1153	535	649	783	804	711	2117	556	741
1120	1161	5933333	54	54_1161	1247	1307	2253	1019	1277	710	3304	1143	692	632	2557	1451	878	1001	1776	2936	3380	1655	1483	1038	1469	1330	1008	1486	1561	1744	865	404	3834	4280	2	1649	3239	1006	1564	1001	2447	2723	1760
1121	1220	6031667	54	54_1220	1248	882	1379	831	644	613	1936	1594	1784	743	847	680	1516	732	1917	1926	2342	3	1615	1647	2431	1173	924	1195	2649	1983	1540	870	1272	2	1645	1956	1994	1062	1119	1257	820	2163	1911
1122	1250	6081666	54	54_1250	687	3	1071	303	495	374	2	1005	536	3	1005	2	485	343	893	1415	1273	3	2	1025	1312	3	546	695	683	1400	1398	2	1468	3	646	1532	1960	474	703	2	3	1544	1235
1123	1297	6160000	54	54_1297	740	674	712	323	2	3	3435	3064	1792	2	176	801	490	3	431	560	465	151	896	2	379	881	3	317	169	535	2	3	1303	1156	2	3	486	250	230	2	3	407	414
1124	1330	6215000	54	54_1330	122	752	352	276	2	3	399	2	3	2	226	292	320	3	2	3	2	3	354	2	326	397	3	2	328	341	3	2	3	1095	2	3	2	3	399	2	3	2	3
1125	1377	6293334	54	54_1377	680	652	776	463	539	916	1190	2	452	542	797	488	559	356	966	1283	1113	429	641	713	959	511	307	710	751	1126	728	3	930	1069	1205	1049	1532	218	661	463	788	1448	953
1126	1422	6368333	54	54_1422	5833	5228	4779	30957	19346	12657	6649	5102	3310	14725	10517	9565	2032	2	1917	2721	1973	374	887	529	853	629	312	1177	505	1309	669	3	19620	20113	730	815	869	2	599	3	562	1242	742
1127	1481	6466667	54	54_1481	681	830	924	1939	2	1091	684	3	474	1080	1143	1177	406	666	861	2	3	282	445	599	491	2	459	889	3	510	2	3	2	1535	518	3	2	484	425	529	361	3	648
1128	1533	6553333	54	54_1533	176	2	258	1034	727	383	731	3	416	400	2	243	3	2	360	3	2	389	252	3	2	3	250	2	3	193	2	3	783	1046	425	2	3	2	3	2	413	359	3
1129	1573	6620000	54	54_1573	2	3	2	3	2	517	229	3	2	3	2	3	2	3	2	3	2	3	2	3	2	3	2	3	265	2	3	2	3	2	3	2	3	2	3	2	3	2	3
1130	1637	6726666	54	54_1637	1348	1067	1492	555	2	713	3	2	3	2	3	2	3	2	3	2	2060	721	944	781	977	550	3	2	894	1239	689	3	1671	1412	998	1001	812	2	559	935	531	949	952
1131	1671	6783333	54	54_1671	5369	4059	5545	508	798	817	15833	15864	23426	1203	998	829	10547	957	2307	11002	9269	860	1705	1408	1805	777	779	847	1109	2732	861	621	8336	6643	1473	1299	1228	726	736	913	2159	2974	2421
1132	1709	6846667	54	54_1709	3	2	654	3	2	3	2	3	2	3	2	404	3	2	3	2	844	427	614	3	304	351	715	516	400	1059	933	859	2	3	2174	1271	1527	535	2	3	2	1677	1099
1133	1743	6903333	54	54_1743	3	2	3	2	3	260	2	3	2	3	2	3	2	3	2	3	2	3	241	2	3	2	236	3	2	3	2	3	2	3	1060	2	538	3	2	3	2	677	3
1134	1779	6963333	54	54_1779	1212	1133	1260	123	2	410	597	3	2	405	512	328	3	630	2	585	3	816	1444	2	870	1338	1156	1479	1087	3095	3244	2470	1180	1291	3273	3942	4842	1442	1956	3116	3072	4112	5865
1135	1828	7045000	54	54_1828	3	2	3	2	3	2	3	2	3	2	3	2	3	2	482	3	2	3	2	3	631	2	3	2	3	790	349	2	3	2	671	565	552	3	2	3	2	581	1110
1136	1882	7135000	54	54_1882	891	1234	2073	631	1335	838	1242	1475	1010	475	1485	1493	1190	1085	957	1486	1506	505	831	1484	1045	1901	1246	1452	601	856	1961	3	7261	1749	1765	935	1491	1373	834	2	1252	1563	1417
1137	1957	7260000	54	54_1957	844	386	3	900	517	622	2	3	2	359	182	467	1649	3	2082	1303	1276	205	167	863	1733	2	3	186	725	2015	531	2	565	650	1051	1627	954	131	3	2	618	1138	3
1138	1993	7320000	54	54_1993	2740	1770	2368	3145	1576	2504	10308	10440	16490	2821	743	768	4356	806	2552	5027	4526	1313	1484	1644	2843	585	736	850	1052	2495	1364	597	4388	2804	1636	1141	1575	466	764	795	1442	2191	1377
1139	2028	7378334	54	54_2028	2	3	435	400	2	3	2	3	2	3	993	1160	2	3	2	3	2	3	2	3	2	3	2	636	3	2	3	2	2022	1891	3	2	353	3	2	3	2	3	515
1140	2072	7451667	54	54_2072	823	762	903	913	1252	2	3	2	3	737	632	1088	2	3	923	742	775	2	871	582	793	3	805	2	790	704	909	3	1080	1061	767	528	682	804	2	3	2170	631	2
1141	2123	7536667	54	54_2123	3	2	3	2	3	2	3	2	3	2	3	2	2259	3	3684	2	3	1771	2	2375	3224	1166	1415	1552	2868	4498	3	2	3	2	3	3576	2953	1199	1677	2	3	4390	2940
1142	2124	7538333	54	54_2124	7189	7640	9617	21566	18194	20838	14355	13724	20583	21440	15233	13053	8613	8900	6136	9420	7981	8441	11378	9508	11372	11063	9948	11512	10952	12357	10643	9197	13717	19286	7635	12263	11346	9647	9925	11688	6949	11701	11448
1143	2182	7635000	54	54_2182	2	11125	3	12352	2	3	2	8905	11752	9866	3	2	10602	2304	12266	11792	12235	3	3382	1953	3326	1655	3032	2	3246	1482	2776	1536	3	2	10164	1235	4623	1736	3086	1878	10148	3	2950
1144	2209	7680000	54	54_2209	2	3	2	3	2	3	2	3	2	3	2	3	2	3	2	3	2	3	2	3	2	3	2	3	2	3	2	3	2	3	1143	2	3	2	3	2	1146	3	749
1145	2278	7795000	54	54_2278	2	1021	1199	345	1266	931	1172	1149	1024	345	927	1290	1208	1225	1536	1711	1272	640	1106	1612	1573	1367	1050	1012	820	1814	1736	3	1013	940	1651	1648	1670	1159	993	734	1754	1681	1517
1146	2328	7878334	54	54_2328	3423	3395	2641	1244	3780	2626	3515	3515	1190	1301	2174	2328	2236	2587	3238	3529	3384	1129	2780	3461	3329	3467	3124	3511	2914	3486	3444	1104	2777	2312	3049	3102	3296	3224	2710	2745	2839	3590	2948
1147	2364	7938334	54	54_2364	2	3	2	3	2	762	3	2	3	935	2	3	2	3	2	3	2	3	2	3	2	3	2	3	2	3	2	524	3	2	3	2	3	2	3	2	977	3	2
1148	2367	7943333	54	54_2367	1158	1183	934	1174	889	481	3161	2945	3743	470	802	831	955	755	1484	1440	1470	1044	1283	973	1322	946	773	1061	1432	1565	1030	3	910	1047	1143	1288	1463	844	722	1263	510	1350	1043
1149	2409	8013333	54	54_2409	2	3	2	3	2	3	2	3	2	3	2	3	2	3	2	3	2	3	2	3	370	2	3	2	3	2	3	2	3	2	3	2	3	192	332	2	3	2	3
1150	2414	8021667	54	54_2414	2	3	491	2	3	2	543	3	261	2	847	481	3	2	677	556	616	3	404	404	440	551	272	619	564	450	361	2	925	1119	443	449	658	329	409	3	2	406	3
1151	2452	8085000	54	54_2452	2	3	2	3	2	3	2	3	302	2	3	2	3	2	3	2	3	2	3	2	3	361	420	2	341	487	3	2	3	2	3	339	2	3	2	3	2	3	2
1152	2498	8161667	54	54_2498	569	741	630	2037	2458	1509	3312	2770	2675	700	1275	581	568	3	496	1338	856	127	2	3	2	3	2	664	3	2	415	3	2513	2015	777	2	667	3	2	3	741	500	2
1153	2599	8330000	54	54_2599	2111	1697	3	549	536	811	2944	3008	4281	820	885	776	3447	513	4423	3342	3384	682	868	3390	4218	756	579	784	1215	4885	2983	868	1117	2	2703	3973	3595	640	997	3	2546	3280	3044
1154	2640	8398334	54	54_2640	3740	2034	2622	623	397	2	9779	10018	17071	483	736	480	9337	3	1165	8060	7539	377	439	719	623	557	582	663	769	873	321	414	3519	417	657	505	699	548	713	985	2	722	616
1155	2730	8548333	54	54_2730	504	943	911	1992	1525	989	755	599	1214	1245	1604	1515	1113	547	596	727	751	393	1492	643	1083	926	539	1087	660	709	620	3	1848	2302	577	542	769	618	698	1360	441	755	598
1156	2761	8600000	54	54_2761	2	3	2	3	2	3	2	3	2	3	2	3	367	2	3	2	3	2	3	2	3	2	3	141	248	1336	356	2	3	2	549	901	435	3	2	3	465	2	3
1157	2840	8731667	54	54_2840	2538	1953	2103	2533	1717	1924	3532	3248	5045	1982	1840	1919	8929	847	9724	7290	7024	876	1946	4952	6693	1148	1180	1259	1688	2373	1216	1014	1748	1854	1362	2133	1719	950	1115	2017	1087	2292	1742
1158	2911	8850000	54	54_2911	464	2	3	1023	511	680	195	2	695	642	229	3	591	439	501	2	3	156	306	2	262	3	440	124	2	506	3	881	2	3	2	285	3	242	590	2	3	2	314
1159	2943	8903334	54	54_2943	466	3	2	834	622	3	223	2	354	878	296	519	472	3	2	3	361	270	304	2	3	2	3	430	441	321	274	2	3	2	3	2	3	420	2	3	2	3	331
1160	3008	9011666	54	54_3008	294	2	3	2	3	269	807	670	1387	2	3	2	1340	3	286	834	638	2	232	861	3	391	308	374	216	209	269	504	2	3	295	259	2	409	701	772	3	343	2
1161	3072	9118333	54	54_3072	138	3	2	213	3	2	3	2	3	2	3	2	3	2	3	2	3	166	202	2	3	2	3	2	3	152	2	3	2	3	2	3	2	3	2	3	2	3	2
1162	3123	9203333	54	54_3123	3	2	3	2	297	284	178	3	209	2	3	271	306	2	3	2	3	2	247	3	2	3	2	271	3	2	3	2	305	3	2	3	2	3	2	3	2	3	2
1163	3154	9255000	54	54_3154	1732	1650	1453	3063	2900	1451	1547	1124	1205	2023	1611	2393	2179	2181	2914	1814	1369	1334	2061	2072	2568	1787	2431	2058	1810	2631	2371	1381	2497	1956	2470	1798	1872	1767	1734	2173	2009	1684	3703
1164	3200	9331667	54	54_3200	3	2	3	402	2	3	2	3	2	3	2	3	600	2	3	2	3	2	3	2	3	2	3	2	384	3	2	3	2	3	773	2	3	2	3	2	742	3	2
1165	3231	9383333	54	54_3231	1038	705	725	239	3	2	467	3	869	2	331	3	841	2	1181	591	3	2	584	755	1344	592	570	678	242	1434	1071	316	731	742	502	1183	1133	354	531	3	577	983	1045
1166	3270	9448334	54	54_3270	961	800	716	717	727	2	305	3	536	865	973	847	513	822	1268	474	489	748	1553	1055	1569	1109	1260	1133	394	1706	1391	1144	947	305	946	1574	1552	767	1569	2	1002	1370	1447
1167	3317	9526667	54	54_3317	679	3	2	3	2	3	2	3	2	3	2	3	2	3	2	3	2	303	457	3	2	3	2	432	414	3	320	353	2	3	376	2	3	256	362	390	355	2	403
1168	3352	9585000	54	54_3352	1194	338	3	677	536	924	1885	1699	3980	667	2	519	884	424	314	420	407	276	778	339	559	3	298	230	1236	745	528	1195	428	321	925	1340	692	230	502	935	647	2	690
1169	3364	9605000	54	54_3364	3	898	951	2141	1215	1559	2308	1522	2997	2368	1370	1626	2878	2	2786	2119	2091	3	2	1669	2675	3	2	3	2	2430	3	2	965	905	3	2	3	2	3	2	3	1227	2
1170	3413	9686666	54	54_3413	3	880	860	491	2	323	435	3	2	321	229	483	1197	3	1087	619	837	249	234	1111	1829	2	3	316	444	1680	740	2	384	3	816	917	529	289	345	2	643	587	1081
1171	3457	9760000	54	54_3457	482	3	2	98	3	2	291	3	236	289	2	3	373	2	403	3	2	3	298	396	2	3	2	3	2	3	2	471	3	2	3	2	3	2	408	3	2	3	2
1172	3533	9886666	54	54_3533	307	3	2	458	383	316	3	2	3	2	3	261	2	3	2	3	2	3	2	3	2	3	2	183	3	303	2	3	321	2	3	2	3	2	3	2	3	2	3
1173	3587	9976666	54	54_3587	1147	1008	849	579	404	291	2	3	175	811	507	759	726	874	1170	545	619	630	1022	1243	1458	1010	857	1003	1165	5462	2470	908	505	562	2900	4584	2823	796	1011	1062	3199	3311	3027
1174	3648	10078333	54	54_3648	395	2	3	1201	2	3	2	3	166	464	336	335	430	2	287	3	2	3	374	320	2	3	2	280	218	371	3	2	3	383	2	309	3	153	2	375	3	2	464
1175	3723	10203333	54	54_3723	582	3	275	203	2	3	212	2	614	3	2	3	673	2	833	377	3	215	158	502	805	2	3	2	442	1324	530	3	2	3	526	956	483	2	3	2	514	707	742
1176	3772	10285000	54	54_3772	262	3	2	3	2	414	396	3	1125	2	3	2	2216	3	2535	1477	1634	2	3	1497	2177	2	3	2	3	2	3	2	3	2	3	2	3	2	3	2	3	2	3
1177	3812	10351666	54	54_3812	665	2420	1982	6379	4097	4275	2859	2677	5120	9137	3678	4229	996	2590	7188	896	1155	4039	5415	3498	1727	3320	3744	2885	2076	2015	1628	5753	2235	742	2423	3845	1955	3073	3245	418	2279	1251	2325
1178	3885	10473333	54	54_3885	2	3	2	3	2	3	2	3	612	2	3	2	3	2	264	422	3	2	3	2	3	2	3	2	3	2	320	3	2	3	242	2	3	2	3	2	3	279	2
1179	3932	10551666	54	54_3932	499	3	2	3	2	3	413	477	1166	2	3	2	623	3	851	2	585	3	2	848	899	3	2	3	278	733	402	2	3	2	324	593	456	196	419	3	2	3	2
1180	3970	10615000	54	54_3970	463	3	388	456	2	337	464	591	1430	386	221	300	1050	3	1069	834	794	190	237	1027	1093	2	3	2	632	1300	572	342	3	2	732	1426	821	241	400	3	651	611	965
1181	4027	10710000	54	54_4027	543	448	418	562	425	432	474	445	741	562	361	481	642	357	1041	665	570	300	521	839	1029	460	421	340	234	1074	601	435	377	2	609	814	586	258	554	3	417	414	521
1182	4077	10793333	54	54_4077	2	3	2	1401	1487	3	2	3	2	1400	3	2	3	1429	2	3	2	3	2	3	2	3	2	3	2	3	2	3	2	3	2	3	2	969	1348	1230	3	2	1973
1183	4120	10865000	54	54_4120	5421	4511	4196	10364	11773	5246	3727	3775	4750	9647	3327	9256	6704	10073	8594	3936	3869	4011	8340	4885	8279	5209	7030	7607	6036	7997	8700	6123	5833	4330	6702	6627	4563	7505	8486	8371	6439	3831	15560
1184	4151	10916667	54	54_4151	3	2	3	2	3	2	3	2	3	2	3	2	3	2	835	3	2	3	2	3	2	3	2	3	255	885	2	3	2	3	2	779	3	2	3	2	3	2	3
1185	4221	11033334	54	54_4221	641	745	629	1092	778	630	1018	710	945	820	687	581	1052	592	1408	992	762	476	885	825	1228	830	779	753	2	3	1015	787	949	949	846	1369	816	713	957	1016	841	810	1239
1186	4312	11185000	54	54_4312	154	2	3	2	3	2	3	2	740	3	2	3	578	2	570	3	2	227	250	385	565	3	320	141	2	575	362	3	2	3	2	567	508	3	2	3	2	3	360
1187	4405	11340000	54	54_4405	2	3	2	943	3	2	3	2	156	840	3	2	723	3	718	2	3	2	3	2	611	3	2	3	2	645	3	2	3	2	3	2	3	2	3	2	3	2	845
1188	4454	11421667	54	54_4454	1227	1069	1077	1447	1510	1243	1020	1036	1248	1017	671	808	1547	871	2641	1342	1330	703	900	2063	2642	738	831	838	895	3340	2221	753	1037	1012	2276	2829	2221	768	815	877	2395	2292	2613
1189	4511	11516666	54	54_4511	513	3	2	3	2	3	2	3	2	3	216	2	3	2	3	2	3	2	270	3	864	2	3	2	232	1484	3	2	3	2	881	1356	765	181	3	2	945	1032	985
1190	4541	11566667	54	54_4541	2783	2102	2139	3	1082	1140	825	785	1737	3202	1994	2004	1834	2295	1000	1033	1154	2568	3570	2584	4039	2526	2788	2529	1149	5356	691	3939	1766	1787	2962	4284	3194	2013	679	3180	2984	3170	3815
1191	4587	11643333	54	54_4587	2	3	362	1090	2	825	641	557	1088	3	319	2	834	3	2	615	586	437	3	2	3	423	2	3	2	3	2	3	577	406	2	3	2	3	2	3	2	3	2
1192	4631	11716666	54	54_4631	333	3	2	283	287	277	243	3	331	435	2	341	283	3	841	2	3	2	368	599	881	3	262	330	411	1330	613	2	3	2	618	1079	570	165	3	517	742	680	947
1193	4673	11786667	54	54_4673	1368	1047	1017	852	499	676	1366	1040	1793	1726	1089	1059	1333	1159	2801	1008	1128	1259	1774	2034	2750	1317	1288	1279	805	3262	1854	1862	1034	1032	1715	2655	1855	958	1735	1812	1847	1879	2277
1194	4714	11855000	54	54_4714	2	3	2	3	2	3	1169	2	3	2	3	2	3	2	582	3	2	3	2	3	2	3	2	3	2	212	3	2	3	2	3	2	3	2	3	2	3	2	3
1195	4750	11915000	54	54_4750	607	489	617	564	2	3	1159	959	1573	474	388	432	1334	2	1033	1030	1058	443	290	809	864	3	2	335	543	1147	662	465	3	511	820	789	675	348	443	704	681	708	860
1196	4819	12030000	54	54_4819	130	2	3	2	3	2	3	2	3	1840	739	1169	2	986	3	2	3	975	1147	2	3	2	511	3	2	3	2	1195	3	2	3	2	3	622	2	3	2	3	2
1197	4863	12103333	54	54_4863	5879	4792	5340	1181	850	1131	2314	802	3586	3657	1465	1793	4561	1597	4826	3426	4049	1922	2522	4017	2686	1248	1220	1047	1025	3370	2379	2948	2327	1529	2359	3275	2317	951	2008	799	2582	2210	2350
1198	4885	12140000	54	54_4885	3	2	3	2107	1239	1783	2	3	2	3	2	3	2	3	2	3	2	3	2	3	2	3	2	3	2	3	2	3	2	3	2	3	2	3	2	3	2	3	2
1199	4950	12248333	54	54_4950	11206	9417	9746	12790	11741	7616	5304	3103	6748	13746	3981	10794	10561	13327	11726	2965	3306	6776	11742	7996	10349	5158	7230	8360	8614	10585	11243	10760	6254	4470	8562	11084	5645	8792	12726	12856	10017	5667	20873
1200	4956	12258333	54	54_4956	3	2	3	9693	7199	7872	2	3	2	3	2	3	2	3	2	3	2	3	2	3	2	3	2	3	2	3	2	3	2393	1982	2	3	2	3	2	3	2	3	2
1201	4992	12318334	54	54_4992	14460	12076	9042	28579	29381	18906	19046	20157	20691	26381	9409	22421	21978	25423	23204	20170	10505	18120	21313	15273	20988	12844	17875	18342	16995	21761	20998	17434	14547	11804	16114	19236	12403	18126	22153	21877	18291	12192	37985
1202	5039	12396667	54	54_5039	20242	19025	19242	3	2	3	2	3	2	3	2	3	2	3	6681	2	19787	3	2	3	2	3	2	3	2	3	2	3	2	3	2	3	2	3	2	3	2	3	2
1203	5071	12450000	54	54_5071	25274	25982	25595	25197	21867	25254	3	2	3	5205	1835	3167	2	4368	20523	3	2	2934	2852	23267	4995	1390	1793	2082	2193	3839	3531	1530	23526	21171	1596	2880	2041	1021	1366	2763	2063	2262	3218
1204	5102	12501667	54	54_5102	3	2	3	2	3	2	3	2	3	680	481	448	2	3	4652	2	3	163	751	4499	2	3	2	478	3	2	381	3	2	3	2	717	3	2	3	788	2	3	2
1205	5151	12583333	54	54_5151	17170	16759	17091	27729	27442	26674	32995	33775	34913	1064	347	635	34128	719	19843	37605	35474	449	532	16136	2590	3	319	399	887	1352	595	2	16269	17939	3	555	454	117	2	681	321	826	482
1206	5111	12516666	54	54_5111	4123	3276	4397	3	2	3	12000	13159	2	3	2	3	2	3	2	3	12735	2	3	2	1070	3	2	3	443	648	2	3	2	3	2	3	2	3	2	3	2	3	2
1207	5193	12653334	54	54_5193	1214	3	1288	18704	17264	18048	19369	20151	19621	2	3	2	19000	3	799	22227	21607	2	194	1542	3	2	3	2	138	603	3	2	1103	603	3	361	2	3	2	3	2	3	2
1208	5259	12763333	54	54_5259	3	2	3	1260	1065	2	3	2	3	427	2	3	2	3	2	3	2	937	231	585	3	2	3	134	158	234	2	3	308	2	3	2	3	165	2	3	2	3	440
1209	5291	12816667	54	54_5291	919	634	548	2590	2163	1014	586	460	834	1704	278	868	1180	1140	1303	2631	1770	706	1046	1321	953	525	672	832	849	1027	858	1034	700	546	632	770	499	841	1045	1185	818	397	1798
1210	5325	12873333	54	54_5325	1355	811	708	3353	2729	1424	891	838	2076	2540	513	1486	1964	1664	1973	1350	1544	1201	1837	1235	1469	816	1194	1319	1437	1758	1534	1890	1044	734	1105	1523	791	1327	1933	2134	1374	657	2950
1211	5357	12926666	54	54_5357	386	2	3	730	560	505	2	3	2	389	3	2	3	2	320	3	2	3	244	283	2	3	2	161	168	315	3	355	2	3	2	3	2	156	3	2	3	2	393
1212	5401	13000000	54	54_5401	252	3	2	473	333	3	2	3	441	2	3	2	254	3	2	3	2	3	2	3	2	3	2	3	2	285	3	2	3	2	3	2	3	2	3	2	3	2	3
1213	5439	13063334	54	54_5439	678	516	662	328	763	497	1462	577	549	649	875	604	537	432	697	861	888	914	507	728	506	405	638	491	723	791	553	446	944	1153	1061	581	870	398	383	767	812	642	379
1214	5525	13206667	54	54_5525	3809	3034	3178	5498	3976	4138	4752	3752	4672	4037	3509	3045	4030	2838	4788	3803	4697	6952	3122	3288	3386	2797	2973	2972	4574	4292	2669	3744	3834	3894	3741	3497	3713	2693	2601	3916	3313	3498	3622
1215	5559	13263333	54	54_5559	802	2	3	3854	2620	2737	2	3	328	739	2	479	804	515	760	3	2	282	523	3	2	3	449	463	480	590	2	482	1273	758	3	2	3	487	457	617	389	2	1009
1216	5592	13318334	54	54_5592	3	2	3	150	2	3	2	3	2	3	2	3	237	2	3	2	3	2	3	2	3	2	3	2	3	2	3	2	3	2	3	2	3	2	3	2	3	2	253
1217	5641	13400000	54	54_5641	233	3	2	271	3	2	440	481	479	3	2	3	615	2	281	549	590	3	215	305	341	2	3	133	140	357	2	3	2	3	2	216	3	2	3	2	3	2	328
1218	5701	13500000	54	54_5701	126460	82562	69498	261105	219649	159822	89670	100234	171417	241182	53467	160778	195730	188328	180433	81474	102936	122857	179258	96470	141169	80222	110022	125118	137067	156018	154730	186427	107891	74522	116930	156902	74564	138243	186009	195684	141955	76704	273470
1219	5780	13631667	54	54_5780	4118	2530	2132	8368	6027	4301	2508	3146	5102	7436	1983	4354	5677	5936	4746	2463	3090	4109	5310	2971	3799	2662	3319	3524	3694	5425	3845	4350	2973	2438	3058	4135	2176	3489	4130	5054	3421	2495	7058
1220	5816	13691667	54	54_5816	1454	699	698	1541	3	2	759	800	1495	3	447	778	1966	1589	2265	1174	1452	920	1793	1433	1486	2	3	729	842	2176	1317	2	983	1182	956	1314	633	3	2	253	808	601	922
1221	5864	13771667	54	54_5864	448	3	2	3	367	2	198	3	2	779	316	3	2	644	177	3	2	273	597	3	2	400	3	212	190	584	2	3	2	3	267	334	2	176	3	2	3	2	3
1222	5920	13865000	54	54_5920	210	2	3	2	3	2	225	3	2	239	3	2	326	654	3	2	3	2	558	3	2	3	2	3	117	2	3	2	3	2	3	2	3	2	3	2	3	2	3
1223	6011	14016666	54	54_6011	595	2	449	550	613	421	479	3	600	527	243	445	934	2	608	522	3	147	297	334	2	3	2	250	398	555	3	481	2	418	3	332	2	304	3	432	2	3	608
1224	6073	14120000	54	54_6073	196	2	3	303	2	3	2	3	2	3	2	3	2	3	266	2	3	237	231	2	3	2	3	197	266	166	2	3	2	3	2	3	2	178	3	2	3	2	3
1225	6153	14253333	54	54_6153	3169	2187	2221	3731	2044	2399	2511	2147	4314	3564	1571	1974	3822	2443	3468	2069	2748	6002	2544	2532	2589	1630	1981	1856	2885	3280	1943	3669	2150	2267	2166	2556	1589	1842	1974	3268	2366	1739	3387
1226	6191	14316667	54	54_6191	22619	14086	12020	33277	14309	26262	18716	20018	37603	25371	8385	12182	38692	13700	12191	15950	23326	20201	21435	8857	7526	18398	14471	13083	7220	9385	5407	30100	12351	17211	4791	8792	2673	13596	12774	26425	4672	3716	11842
1227	6236	14391666	54	54_6236	2010	1282	1446	3335	1752	2201	2279	2006	3898	2657	1487	1468	3177	1552	1996	2030	2401	3033	1561	1451	1429	1498	1367	1348	2090	1798	1214	2457	1671	1657	1537	1534	1361	1312	1311	2229	1301	1255	1459
1228	6279	14463333	54	54_6279	130	2	3	354	2	3	2	3	268	373	2	3	2	350	3	2	3	2	109	3	2	3	2	3	2	3	2	3	2	3	2	3	2	3	2	3	2	3	2
1229	6374	14621667	54	54_6374	3	2	3	2310	2	637	181	3	1241	2	3	604	787	1218	2	3	2	3	2	601	686	3	313	292	270	2	268	3	2	3	2	3	2	447	293	3	2	3	2
1230	6429	14713333	54	54_6429	698	3	2	3	940	667	254	2	1528	1613	3	672	1198	2	968	3	2	476	561	3	624	2	3	326	522	582	328	1280	377	2	359	494	3	524	524	1134	336	2	1363
1231	6587	14976666	54	54_6587	3	2	3	782	2	403	3	2	1061	343	286	3	746	2	3	2	522	490	3	2	3	2	3	207	249	2	3	2	3	301	2	3	2	3	2	3	2	3	2
1232	6789	15313334	54	54_6789	165	3	2	192	3	2	3	2	169	3	2	3	2	3	2	3	2	245	3	2	3	2	3	122	167	2	3	2	3	2	3	2	3	2	3	2	3	2	3
1233	6836	15391666	54	54_6836	671	2	3	5255	2	1171	3	2	5336	2715	232	252	3156	886	1410	3	1346	1377	587	2	403	3	2	194	930	1030	3	3635	2	3	462	665	2	263	432	1380	490	3	1229
1234	6940	15565000	54	54_6940	543	373	571	2	3	2	3	2	3	2	3	2	3	2	424	3	2	3	2	3	2	3	2	3	2	353	3	2	3	2	311	345	3	2	3	2	376	3	2
1235	7004	15671667	54	54_7004	427	3	310	735	2	374	217	3	711	425	2	249	648	339	515	3	478	527	438	375	394	2	3	201	420	462	2	655	3	2	232	355	3	240	2	541	335	3	554
1236	7104	15838333	54	54_7104	5156	2624	2324	7205	1640	2707	1998	1309	8204	4744	1062	2142	2952	1854	4665	1101	1434	3236	3212	1573	2752	1865	2740	997	3390	2297	1218	5742	3378	1293	1813	4039	2370	2305	2879	3817	3055	1936	3408
1237	7268	16111666	54	54_7268	1119	805	1073	440	2	373	2397	1786	2577	396	199	3	3199	2	3415	2741	3282	481	321	2644	2411	3	278	216	776	3444	2183	469	2	3	2714	2778	2290	136	2	3	2835	2120	2358
1238	7372	16285000	54	54_7372	923	338	350	1362	2	618	377	3	1279	937	236	321	1190	434	1150	547	777	1102	553	773	494	2	3	232	631	1135	661	1118	2	344	748	932	736	255	3	756	927	526	803
1239	7937	17226667	54	54_7937	514	2	3	932	2	409	3	2	934	674	3	2	695	3	459	2	3	716	303	2	3	2	3	2	417	404	3	907	2	3	2	246	3	110	2	544	3	2	396
1240	7977	17293333	54	54_7977	5076	3790	5460	6157	3171	5023	23885	21847	31904	1785	838	502	23222	3	13644	20841	24990	2	3	6277	2	3	2	3	277	406	2	3	3821	2	354	3	2	3	2	3	2	3	2
1241	8557	18260000	54	54_8557	3	2	3	2	3	2	3	2	3	2	3	2	3	2	3	2	3	287	147	2	3	2	3	2	3	2	3	2	3	2	3	2	3	127	2	3	2	3	2
1242	29	4046667	55	55_ 29	60075	58884	46684	46532	43138	55078	49726	47439	3	52970	54816	49156	42891	15603	53531	40170	50318	57000	2	53548	3	54516	48631	54607	58013	54643	50380	2	56494	51030	56629	54240	54545	49122	44973	53870	53643	50065	52570
1243	93	4153333	55	55_ 93	2468	3246	3	434	571	2	16128	13795	24891	3	2	3	6613	2	4736	8211	5818	3	1019	1024	2	3	2	3	590	1188	2	3	4411	928	2	3	2	330	3	2	3	540	2
1244	137	4226666	55	55_ 137	17921	15868	22232	9282	12429	10226	14051	9842	11199	9798	18037	11827	10698	3	11532	15452	16066	19675	19434	11036	2	21831	20069	22450	14118	31045	42092	29339	17840	22060	33132	40559	49613	22053	24576	29879	37783	38408	46267
1245	193	4320000	55	55_ 193	9851	9891	14828	12084	12958	12867	12887	13021	16496	11334	11786	11389	13491	3	15014	13999	14015	11170	12793	13013	2	12394	11903	13228	12675	14073	13802	12218	12952	17299	12703	13858	14391	12260	11636	14360	13667	12588	13125
1246	270	4448333	55	55_ 270	11778	11961	19928	21182	25145	19771	17733	18354	22496	16924	22473	16590	17190	3	18373	20655	23476	17863	17167	17338	2	18860	16907	17203	13998	18569	18970	18241	23214	21478	19188	17723	21039	16296	18057	18324	20531	16906	18081
1247	309	4513333	55	55_ 309	1342	2003	2914	2930	4874	3768	4386	2825	2001	2406	4544	4185	582	3	2916	5017	4522	2208	3027	2437	2	3920	3789	3737	3231	3008	2932	1293	4323	3509	4160	3879	5049	3459	3299	2301	4462	4303	4250
1248	365	4606667	55	55_ 365	806	852	857	1272	1080	1623	1036	977	1168	3	382	2	631	3	2	1369	526	3	2	1539	3	236	2	3	2	3	2	3	692	2	3	2	3	2	3	2	3	2	3
1249	416	4691667	55	55_ 416	1474	2046	2190	2805	3711	2002	3087	3109	2375	1930	2107	2298	2456	2	2528	2445	2477	3272	1770	1919	3	1630	1667	2008	1907	1954	2667	1471	2151	2794	1712	2034	2	1922	1501	3	2603	1616	3972
1250	476	4791667	55	55_ 476	2	501	3	2	763	3	480	2	3	2	297	364	3	2	339	3	2	3	2	3	2	3	2	3	2	357	3	516	717	2	3	2	390	3	273	505	2	3	2
1251	509	4846667	55	55_ 509	983	1505	365	3	936	848	1083	1142	235	432	921	973	528	2	803	1303	1008	1284	888	3	2	1285	1219	949	811	1014	939	256	709	261	1352	1056	1711	1066	1311	900	1713	1122	1160
1252	555	4923333	55	55_ 555	13350	12782	15458	9869	13932	10448	5037	4794	5746	4315	8385	3266	4468	3	8981	5082	4013	3418	3088	8187	2	2364	2300	1964	1072	8557	8184	1549	11997	104827	5365	6388	4774	1543	2273	2897	7326	5484	5881
1253	608	5011667	55	55_ 608	9570	8329	10062	3008	3865	3066	8225	8573	9668	8401	3774	7338	9919	3	10258	8559	8869	8056	6682	9542	2	7673	7704	7498	7657	10195	8994	7444	2351	12070	8197	8681	7942	7508	7393	8884	9811	7977	8653
1254	654	5088333	55	55_ 654	835	3	2	3	1024	2	2121	1322	3	2	3	2	3	2	3	1087	1392	2	3	863	2	3	2	3	2	3	658	2	3	2	3	773	2	3	218	2	3	457	2
1255	686	5141667	55	55_ 686	5081	549	3	3332	5583	696	6523	6239	1251	698	7456	5464	1479	2	5157	8301	7711	639	4871	4649	3	6395	5017	5454	5461	5298	5818	2	7805	3	612	5858	8058	5583	4857	5297	460	6197	4522
1256	717	5193333	55	55_ 717	234613	184145	207132	288969	260432	204613	341427	304623	338386	134014	134316	55532	142116	2	145773	162359	208486	105653	134843	218991	79353	64728	63865	109932	80332	103833	109882	51704	331496	181153	156367	116749	123885	54248	87475	55997	93380	152064	75072
1257	766	5275000	55	55_ 766	3471	3118	3767	3561	4919	5894	4539	4480	5347	4484	3409	3615	5619	3	3696	4215	4370	5329	3556	5560	2	3529	4482	3481	4582	3383	4174	3721	4502	3585	6576	3369	4153	4169	3430	3473	6219	3525	5089
1258	809	5346667	55	55_ 809	1187	3	2	3	2	3	2	3	2297	388	2	3	2	3	2	3	2	3	2	880	3	2	3	2	3	2	3	2	3	2	1207	3	2	3	2	3	2	3	2
1259	839	5396667	55	55_ 839	1591	2280	2791	2517	2102	3	2558	1924	1258	2299	2121	2588	2603	2	2507	1756	2082	1840	2185	1840	3	2191	2231	2707	2452	2051	2148	1397	2067	2084	1927	1580	1941	2471	1830	2351	2	1028	3201
1260	882	5468333	55	55_ 882	171843	225666	187847	21486	7403	3251	643383	516902	311287	8851	16067	12300	257371	3	63569	335510	219742	17602	48742	26738	2	7843	9062	16752	14582	69470	17820	5438	225650	231565	13843	19176	15694	5424	15249	16388	10153	55488	16502
1261	953	5586667	55	55_ 953	3	2	3	2	3	251	2	3	2	3	1724	1570	2	3	2	3	2	1200	2818	3	2	1554	3	1799	2	3	2	3	2	3	2	3	2	3	2	3	2	169	3
1262	980	5631667	55	55_ 980	22601	2	11131	13132	7550	7789	66243	66773	111532	6966	10270	4510	48874	3	20609	45382	40950	7665	10337	14139	2	4342	5556	7837	9391	20391	7734	4294	41303	3	10192	7510	9747	4319	7968	17566	9427	25965	7600
1263	1015	5690000	55	55_1015	2	11856	3	2	3	2	3	2	3	2	3	2	3	2	3	2	3	2	3	2	3	2	3	2	3	2	3	170	2	21177	3	2	3	2	3	2	3	2	3
1264	1061	5766667	55	55_1061	4369	2819	4047	4453	5159	7062	5306	4377	5192	5533	4751	4443	4795	2	4987	4328	5194	6060	4127	4235	3	4317	5301	5186	5592	4843	4160	6443	5581	4758	5858	4802	4278	5607	5752	5487	5014	4470	4077
1265	1116	5858333	55	55_1116	4833	4387	8539	4087	6883	12197	32438	9625	8603	5644	8756	3376	8414	2	3027	11827	14434	19745	2094	8634	3	3410	6913	3797	2	3522	6114	3961	10054	9423	3	5120	14469	4975	10058	3533	36423	9763	8278
1266	1161	5933333	55	55_1161	26526	29420	52661	21911	31638	2	93037	30313	14784	15924	67376	34498	20633	3	35062	72578	81754	48687	26870	31137	2	28649	28585	35943	31088	35353	26981	10801	94160	103961	77070	33090	80578	25715	38225	22655	59976	68840	40560
1267	1222	6035000	55	55_1222	9575	8423	9665	9411	7545	8661	21405	19648	21827	4763	5414	4293	20874	3	30780	23592	23952	4859	7549	23468	2	6089	5094	5638	14788	18912	8429	5016	8000	7021	5031	17904	10154	5581	5011	6013	6761	17434	9881
1268	1252	6085000	55	55_1252	3	2	3	2	3	2	3	2	3	5595	6341	5564	2	3	2	3	2	7036	6137	3	2	6028	5341	5657	6310	3	7681	5852	2	3	7562	2	8056	5362	5561	5301	1158	3	6927
1269	1297	6160000	55	55_1297	2618	2676	1956	499	556	834	13501	11541	7178	732	493	2	6674	3	1630	1947	1780	1293	723	1134	2	636	549	300	572	1594	893	614	4573	3844	1143	3	690	364	384	2	7474	1365	1164
1270	1363	6270000	55	55_1363	7127	7420	7824	5567	5249	3936	10829	9923	10168	5768	5539	6472	12949	3	19568	9286	12011	4596	7504	2	3	7312	6736	6698	7060	10183	13709	2	5537	6923	14969	9897	13108	5820	6770	3636	15024	8048	11441
1271	1433	6386667	55	55_1433	49838	36755	53224	121052	77115	51265	43781	39351	56304	56172	44259	39226	76074	3	118320	79504	83937	22640	12961	61191	100753	2535	1804	6956	46798	136402	100361	5111	77036	79535	61729	97675	106228	1827	8161	8747	41694	59131	95989
1272	1455	6423333	55	55_1455	2	321	3	2582	3813	2013	2	1424	911	1928	3351	3323	490	3	2	3	2	350	531	665	3	440	2	3	446	698	2	169	3329	1022	3	2	3	336	284	746	2	659	3
1273	1532	6551667	55	55_1532	1791	1591	1666	4613	3533	3146	3655	2405	2392	2821	2540	2999	2358	2	2826	2034	2349	1657	2631	2049	3	1666	1703	2012	2739	2281	1729	1383	2579	3048	1990	1874	1855	1751	1744	2558	2516	2177	2663
1274	1566	6608333	55	55_1566	2	3	2	3	1492	2	1897	2224	2364	1919	1315	3	2	3	1141	1211	2	2518	3	2	3	791	1236	2	3	2	1528	1669	1198	3	2	3	2	1075	1276	1222	3	2	1723
1275	1613	6686666	55	55_1613	3	3661	5296	10514	2	3496	3	2	3	2	3	2	3	2	3	2	1948	3	415	1811	2	3	2	1090	1871	1371	3	2	3	2	2654	1175	1142	3	2	3	2	1335	3
1276	1637	6726666	55	55_1637	11569	8424	9891	8492	12652	25017	2	3	2	14358	8116	6261	15572	3	14905	15357	17960	10450	6708	16011	2	5939	7223	6580	11680	18981	12545	7975	12560	10566	20814	18731	14176	6321	7788	7284	16572	16505	11440
1277	1672	6785000	55	55_1672	45193	35732	44373	30390	36121	39693	126191	126809	181476	38973	33475	16734	83904	3	32866	84984	73677	30313	17813	27567	2	15105	19879	20210	30821	32239	25860	16659	69767	57968	38080	31637	43327	16352	21773	18332	33328	34740	26371
1278	1727	6876667	55	55_1727	1602	2246	3	1761	2348	2461	2	3	2021	1471	3741	2588	2297	2	3	2	3	1688	2376	2174	2	2543	1713	2337	3	2275	2	3	4228	4417	3886	2	3	1425	1757	2263	2	3	2
1279	1762	6935000	55	55_1762	2676	3570	3859	1941	2164	1147	3540	3428	2324	1852	920	2807	3069	3	5238	4141	4394	2513	2	3530	3	2	3	2	3806	3	2	4529	3	4801	2	3	2	3	2	7750	9671	9225	13211
1280	1828	7045000	55	55_1828	3	2	3	2	588	3	584	783	2	3	2	689	1161	3	1605	2	3	552	2	1070	3	2	296	3	853	1831	1736	2	3	2	3	2116	2	3	2	3	1558	1516	2
1281	1870	7115000	55	55_1870	3155	542	465	2364	428	4472	6582	7628	3	2	931	553	5605	3	5046	948	1045	4430	2	9009	3	581	7886	2	4283	4346	12554	1400	644	233	8701	6510	2346	9170	5479	3486	8783	8675	2406
1282	1915	7190000	55	55_1915	8424	7807	12833	9275	8337	6474	8968	8261	3830	7440	9861	9119	9263	3	11951	8132	8787	7957	5793	9668	2	12147	8175	8537	8253	9785	8752	6021	14348	7885	9019	8231	9163	8241	6424	7574	7774	9109	7071
1283	1917	7193333	55	55_1917	3	8810	8921	2	9622	1470	3	2	6270	3294	8863	9785	9972	3	2	8792	8595	3	8872	2	3	9364	2	9291	3	2	3	775	10629	9614	2	3	9126	847	2	3	2	3	2
1284	1958	7261667	55	55_1958	4628	3	2	3	2	3	2	3	2	3	2	2881	3	2	3	2	3	2	3	2	3	599	2	1261	3	2	3	2	3	3333	2	3	2	3	2	3	2	3	2
1285	1995	7323333	55	55_1995	20650	17280	19116	8396	6300	4704	78262	74662	115465	10397	2730	9377	57783	3	28927	56927	55324	11290	16386	17191	2	7865	6541	9218	10068	20204	16865	5446	27046	16844	10711	14863	14817	5404	6822	3	10377	14771	3819
1286	2030	7381667	55	55_2030	2874	2	980	3	2	267	3115	764	3588	3	2	3	2	3	2	3	2	946	3	2	3	2	3	2	3	2	3	2	2304	1469	909	3	2	3	1053	2	1097	1206	3
1287	2080	7465000	55	55_2080	2	3	2	3	2	3	2	3	2	3	2	3	2	3	2	3	2	3	2	3	2	3	2	607	3	2	353	3	2	3	562	2	3	2	3	2	38401	3	2
1288	2089	7480000	55	55_2089	19203	7891	11765	22791	24077	78739	30611	3	2	34378	14276	3	38655	2	3	2	3	29814	2	26518	3	2	17362	10878	3	18630	19989	23610	16570	9504	35856	19915	18124	14855	2	8288	23448	19037	3
1289	2148	7578333	55	55_2148	2	3	2	3	2	3	58753	56510	88285	111794	2	3	41611	2	18041	36078	34423	3	9132	20069	2	3	2	3	26531	22999	20336	2	3	2	3	2	3	2	10309	14541	44406	3	14899
1290	2181	7633333	55	55_2181	259166	260156	273878	281133	275874	209532	191985	186760	224379	233751	260009	277487	221617	187664	49655	244424	267589	186672	264942	235222	251915	250271	229929	267531	256669	266795	244783	205575	100951	97760	206888	251730	248642	224130	219673	274830	213222	238173	254857
1291	2277	7793334	55	55_2277	18475	16677	17180	9332	12582	10681	19186	14052	21068	10628	9502	12227	22981	2	29851	26094	23280	6651	10687	24752	3	11628	9597	8944	11168	35180	23179	7359	10137	9528	24434	31191	27331	10538	9076	7972	24276	27907	25717
1292	2367	7943333	55	55_2367	4977	2	4880	5952	3	3855	13598	10860	12511	6621	4835	2	11834	3	14083	12185	12091	3972	2	11920	3	2	4080	4721	3	13660	2	4019	4107	3	4191	10249	2	3	3496	2	3457	4302	3719
1293	2410	8015000	55	55_2410	2301	1502	1595	3077	2952	3	12311	9802	13261	2626	3691	2463	4710	2	6074	5578	5907	1392	2257	4196	3	1708	1217	2134	2	6347	1042	490	3373	3359	2093	4354	3	2	1483	968	3	1113	2
1294	2410	8015000	55	55_2410	3	2	3	2	3	2	3	711	2	3	2	3	2	3	2	3	2	3	2	653	3	2	3	2	3	1484	2	3	2	3	2	1341	3	2	3	2	3	2	3
1295	2451	8083333	55	55_2451	2	3	2	3	2	7581	3001	8945	5750	7084	3	2	6971	3	1945	2	2121	5410	3	7226	2	3	7082	2	7589	3	7046	4423	2	3	6913	2	7499	3	5755	2	5973	3	2
1296	2451	8083333	55	55_2451	7913	8098	8035	11727	10250	463	17133	16252	13255	550	10053	8966	4077	3	10360	7345	8231	1565	7722	1577	2	8301	1313	8213	1497	8039	1088	1168	13553	11362	911	6637	3	7052	1308	7241	824	7748	9081
1297	2499	8163333	55	55_2499	2	3	2	3	2	3	663	798	1493	2	3	1536	899	2	2638	3	3688	422	2253	213	2	1628	3	1662	2	1712	3	2	3	3333	2	1233	3	1516	2	1777	3	857	1624
1298	2555	8256667	55	55_2555	697	2	3	2	3	2	3	2	3	2	3	2	3	2	1120	690	3	2	3	2	3	2	3	2	3	1813	1403	463	2	3	2	1247	1059	3	2	293	3	2	1316
1299	2599	8330000	55	55_2599	29484	24864	26756	14565	11794	12974	35088	33004	44082	19967	12296	13078	42065	3	60729	41968	39671	15763	14396	45249	2	13209	12392	13012	15319	64452	41707	14405	14823	6853	37712	52039	44875	10042	14799	1103	37983	41068	42397
1300	2641	8400000	55	55_2641	3	8658	2	12663	9336	12646	33671	34156	58193	15197	9265	8554	35132	3	15109	29116	26228	10281	10223	10769	2	7134	8347	7933	10568	11224	7384	9930	3	8117	11568	10269	7376	7570	8042	7116	10719	10559	10473
1301	2692	8485000	55	55_2692	54884	36081	30687	67162	30421	32516	19973	19607	47454	80199	35544	39437	35758	8902	91064	24056	23097	36205	71276	31964	39996	32858	30537	34769	54196	77177	21215	58848	28740	23332	35160	54180	26100	29819	32405	14473	31760	61193	25563
1302	2731	8550000	55	55_2731	2	3	2	3	2	3	2	3	2	3	2	2018	3	2	3	2	3	2	3405	3	2	3	2	1850	3	2	3	2	3	2	3	2	3	2	3	2	3	2	3
1303	2761	8600000	55	55_2761	40639	31068	30283	30339	19368	19115	55544	47765	73882	28389	19231	22160	72659	2	90576	61362	60060	14044	25525	58611	3	16856	14284	16885	28913	92719	48634	20310	20006	12693	43945	70468	52809	12470	16755	2736	42594	53622	51027
1304	2795	8656667	55	55_2795	258	2	3	2	663	3	2	3	2	829	171	373	3	2	3	2	3	411	525	659	2	3	2	3	2	3	2	668	3	2	3	2	3	245	2	3	2	3	2
1305	2826	8708333	55	55_2826	5399	4992	4846	7318	4911	3907	4705	5253	6439	4950	5147	4858	8650	3	6636	7097	5791	4811	6958	8419	2	5348	3942	4446	5171	6671	5971	5226	5812	5880	4852	6689	5361	4296	4924	8679	4192	4974	8536
1306	2859	8763333	55	55_2859	3	344	2	448	256	3	2	3	454	2	3	2	546	3	2	976	3	2	3	823	2	3	2	3	2	1094	443	3	2	3	406	519	865	2	3	2	471	3	1320
1307	2911	8850000	55	55_2911	2	3	2	1907	3	257	2	3	1466	654	2	3	2	3	2	3	2	3	573	2	3	2	3	195	1425	2	3	352	2	1560	3	2	3	725	285	1208	2	3	2
1308	2976	8958333	55	55_2976	2002	1362	1664	2758	2252	1690	2280	1454	2032	1670	1641	1904	2566	3	2876	1793	1957	2477	1609	2243	2	1443	1837	1356	2902	2898	1791	1946	1993	2404	2021	2241	2162	2520	2088	3339	2467	1707	2779
1309	3009	9013333	55	55_3009	3	2	554	1027	3	987	2329	1598	2742	1850	2	3	2670	2	1769	1620	1542	719	506	2275	3	2	3	2	1416	1158	1074	1822	1605	3	1246	1130	1173	2	1049	3	1031	522	1025
1310	3048	9078333	55	55_3048	2	1306	1328	1732	3	1210	2126	1027	1431	2	1568	3	1302	2	2324	974	1718	1316	1679	1302	3	1605	2	1537	1896	2099	1422	3	438	1954	2	1409	1427	1315	3	1492	2	827	1826
1311	3110	9181666	55	55_3110	1325	885	628	754	621	837	5250	3570	4257	3	2	1144	1471	3	2371	1499	2	3	1242	1561	2	779	890	955	1028	2002	1192	1097	535	1699	1371	1302	1559	659	524	759	1105	609	2087
1312	3155	9256667	55	55_3155	5523	4304	3816	6785	5478	4037	5554	3	4505	4942	4099	5485	6317	2	8201	3	4277	14893	5487	6452	2	4158	5236	4935	5069	6727	5258	4837	5668	6946	6153	5398	4877	4339	3981	5876	4901	4205	8678
1313	3214	9355000	55	55_3214	10278	11448	5850	9752	6692	6635	7639	6741	13518	3	2	3	19029	2	5252	6467	6140	2737	3	8596	2	2794	3182	3076	1549	3	3759	2	4237	4929	3	2	4610	3003	3722	3936	3	2	4779
1314	3268	9445000	55	55_3268	4588	4078	3201	2777	3083	2798	2403	1537	2435	2923	3213	3706	3359	3	5209	1828	2431	3926	6346	4620	2	4320	4940	4472	1720	6725	4372	5563	2566	2542	2868	5759	4995	4131	5829	2984	3150	3516	6282
1315	3317	9526667	55	55_3317	1972	1233	608	3	1349	2	5922	4870	10026	1612	707	3	2	3	2	553	3	423	1552	1389	2	458	979	3	2	2274	611	3	911	977	945	2	3	826	925	2	487	3	2
1316	3365	9606667	55	55_3365	12421	10024	8533	20218	11989	14853	20093	16005	26841	18203	10884	12049	28494	3	23969	16405	18182	1618	6138	15680	2	1903	3078	3036	8258	17026	3056	5133	8010	7811	4876	11114	3997	2104	2742	4291	2678	9201	3
1317	3452	9751667	55	55_3452	2	3	2	3	7935	7750	8037	6576	2979	13341	6864	7532	2	3	2	6119	3	7619	8934	9543	2	6323	5970	6260	5304	3	7588	7530	6952	6064	7488	8563	7886	5396	5522	5733	7220	7619	4615
1318	3502	9835000	55	55_3502	4772	3446	3070	2392	2968	2105	4846	3399	4285	3064	1869	2	5985	3	6079	3409	4788	2	3	2	3	2	494	3	1680	7342	2	3	2	3	2	3	2	3	2	3	2225	2	3
1319	3579	9963333	55	55_3579	2	3	2	2341	3	2	3	2	3	2	3	2	1021	3	2	3	765	2	1232	697	3	751	725	896	2	3	2	3	2	3	2	3	2	497	668	3	2	3	931
1320	3587	9976666	55	55_3587	3532	3199	2983	8370	2375	1325	840	2	756	2759	1784	2416	2335	3	4324	1369	2251	2301	3847	3598	2	3112	2997	3211	3578	15020	7232	3084	2056	2020	7991	12727	7799	2785	3574	3391	9055	9197	8748
1321	3685	10140000	55	55_3685	1734	1653	1454	3	3870	1354	2454	1410	2202	1676	1084	2902	2157	2	3656	2447	2279	1926	3995	3362	3	2467	2872	2594	3116	3410	2118	3364	3406	3049	2810	3937	2999	2312	2322	3702	1677	2061	4623
1322	3648	10078333	55	55_3648	3506	3361	3029	2501	1994	2937	1461	1217	1519	3954	2674	1989	5023	2	2560	1250	1385	1402	2724	2678	3	1456	1457	1916	1793	2143	1889	2092	1883	1776	1689	3594	1765	1771	4404	6940	2160	1462	3513
1323	3720	10198334	55	55_3720	1409	1072	1538	906	613	581	912	2	1278	517	660	899	1194	3	2	844	735	1513	1176	1065	3	686	732	846	1379	2938	1490	989	860	1039	1312	1914	1639	567	1097	1545	1198	1581	2032
1324	3778	10295000	55	55_3778	719	2	3	1096	410	1183	744	750	2605	2	3	2	4101	3	4702	2422	2942	2	466	2748	3	229	378	2	3	2	3	312	2	464	3	695	208	2	305	1094	3	2	3
1325	3811	10350000	55	55_3811	5075	18369	15416	48563	30583	31623	2	12773	22702	65510	27755	32282	7255	7265	51617	4999	5009	31804	40194	27101	16879	25601	27619	22145	15506	2327	9322	42211	17059	2138	18992	11956	9063	23677	24394	4690	10323	8748	17357
1326	3899	10496667	55	55_3899	3	2	3	1429	2	3	2	3	2750	2	3	2	3	2	3	2294	2	3	2	3	2	3	2	3	2	3	2	3	1959	2	3	2	3	2	3	2	3	2	3
1327	3937	10560000	55	55_3937	5537	2963	3362	5029	2	2668	5203	6080	9650	3611	2277	2871	7887	3	8815	5832	6170	2494	3476	6149	2	2324	2067	3	3146	10020	5320	3406	2	3	4716	8197	5993	2017	2772	2	5723	6128	7239
1328	3978	10628333	55	55_3978	4675	3	2	3	2	3	1998	3773	5790	2	1533	3	4674	2	5878	3456	3723	3	2	5091	3	2	3	2	1853	8095	3	2508	2	3	3724	6967	2	3	2	3	5347	5114	2
1329	4008	10678333	55	55_4008	6415	2654	3031	3392	1792	2411	7217	8561	13369	2840	2128	2491	10104	3	11119	7351	7863	2715	3003	6933	2	2204	1660	1818	3486	13330	7645	3601	1399	3	5572	9991	6226	1569	1998	2610	7162	8011	2
1330	4077	10793333	55	55_4077	3	2	3	2	3	2	3	1200	708	2	3	2	3	2	3	2	265	3	2	3	2	3	2	3	2	3	2	3	2	3	2	3	2	3	2	1048	3	2	10739
1331	4100	10831667	55	55_4100	15375	12458	13058	20346	21632	10176	7187	8418	9173	18436	9132	18050	12658	3	16217	7548	7137	8847	16633	12099	6196	9974	13327	14691	11829	17142	18114	12485	11196	9403	20251	14259	10935	14198	16168	16783	13287	8864	30453
1332	4160	10931666	55	55_4160	3996	2593	2380	4175	2900	2330	2420	3076	2290	3122	2180	3129	3606	2	4159	2709	1925	2624	4091	3530	3	2830	2744	2889	3287	4989	4148	3361	2748	2993	3003	4931	3821	2658	2680	4326	3732	3641	6708
1333	4232	11051666	55	55_4232	6987	5230	5521	9862	5030	5321	6423	6072	6422	6675	6496	5270	8259	2	11779	7824	6163	4505	7567	7515	3	5425	6384	5654	6313	12327	8189	6170	6975	7966	6249	10815	8580	5267	6162	9137	8303	8647	10637
1334	4259	11096666	55	55_4259	2	3	2	3	287	2	3	2	2797	3	2	3	2541	2	3	2	3	2	3	1089	2	3	2	3	2	2108	3	301	2	3	343	2176	1517	2	3	1003	1484	2	2800
1335	4299	11163333	55	55_4299	3	2	3	2	3	2	3	2	3	2	3	2	3	2	3	2	3	1049	2	3	2	3	2	696	3	2	3	1219	2	3	676	2	3	651	1186	1282	2	3	2
1336	4379	11296667	55	55_4379	2979	2115	1598	2925	2905	2555	2999	2925	4567	3217	1872	2368	4523	3	5059	2588	3164	1644	3034	3955	2	2110	2299	2283	3268	4832	3181	3569	1950	2296	2614	4200	2924	2329	2427	3714	2759	2854	4990
1337	4412	11351666	55	55_4412	2035	1555	1039	3	2	3	2	3	2	2759	1709	3	3056	2	3080	2443	3	2	2122	2366	3	1733	1800	2	2212	3028	2519	2551	3	1915	2250	2890	2306	2106	2	2308	2213	1744	3
1338	4454	11421667	55	55_4454	5981	5322	4444	4205	3926	3067	4719	4377	6479	3844	2851	3295	8243	2	14006	6223	6552	2654	4285	11000	3	3358	3683	3819	4701	17770	12031	3895	3554	3226	11710	15763	11914	3258	4420	4440	12930	11930	14637
1339	4510	11515000	55	55_4510	2	3	2	3	1084	2	3	2	3	1589	834	2	3	2	3	959	2	3	1249	1887	2	1022	951	869	1243	3	2	1681	1229	842	3	3331	2192	948	1343	1021	2	3	3153
1340	4539	11563334	55	55_4539	9960	6451	6888	2	4666	4677	4717	4053	8037	8977	4775	634	7799	3	2976	4184	2	7122	8133	8005	3	6140	6149	5894	4299	3720	8044	11561	5571	5446	8157	11622	8006	4804	7640	7363	2227	8412	10834
1341	4594	11655000	55	55_4594	1165	1223	1323	2780	2	2380	1915	1547	3	2	1344	3	1341	2	1674	1684	1350	1066	1485	3	2	1556	3	1671	2	3	1757	1348	1729	1938	2	2434	1831	3	2	3	2	1166	3
1342	4632	11718333	55	55_4632	444	2	3	827	605	2	3	2	379	708	3	2	536	3	1092	2	3	2	588	3	2	588	433	343	3	1732	843	2	3	330	554	1604	789	357	435	624	803	538	1493
1343	4675	11790000	55	55_4675	3119	2401	2399	2603	1922	1695	5203	4092	5784	2849	2143	2004	4152	2	7579	3238	3396	2648	2994	5530	3	2711	2664	2292	2077	7665	3678	3285	2375	2743	3958	5904	4509	1810	3133	2774	4006	4265	4977
1344	4715	11856667	55	55_4715	2	389	276	3	2	3	3562	2	3	2	3	2	3	2	1960	3	2	3	2	1143	3	415	273	2	3	1246	441	571	2	421	633	1206	640	3	527	594	2	441	1157
1345	4748	11911667	55	55_4748	7399	6630	6865	6758	6891	6349	11031	7429	8062	7991	7390	6847	8760	3	11443	8096	9631	9862	6171	9244	2	6139	6262	6105	8621	11636	8105	5691	7975	9198	10456	9614	10092	5592	5777	8633	9312	9014	9670
1346	4795	11990000	55	55_4795	3	410	2	1329	1003	1034	766	612	757	3	2	3	543	2	3	810	570	2	3	601	2	326	369	213	3	2	740	331	1351	3	735	2	3	2	287	3	628	343	2
1347	4843	12070000	55	55_4843	3	2	3	21028	11781	17550	2	3	2	3	2	3	2	3	2	3	2	13763	3	2	3	2	3	8531	2	3	2	3	2	3	2	3	2	3	2	1862	3	2	3
1348	4885	12140000	55	55_4885	43358	2	3	47374	26953	37043	16453	12358	2	56858	25999	29507	3	2	69266	3	16382	31703	39126	44421	36793	22950	23080	16348	18653	57715	25537	45462	46176	31414	33163	46374	30507	20259	31586	3003	34929	35608	35752
1349	4922	12201667	55	55_4922	26103	28180	33234	49644	46173	31263	49447	23625	39637	50379	15251	39805	40546	42390	44872	16971	24015	26491	43077	25248	31920	21248	28243	32096	32559	40163	41890	39858	26163	19812	31680	41334	21868	34805	46253	46617	36442	22087	75775
1350	4956	12258333	55	55_4956	2	20826	21864	24412	18963	20347	12413	3	2	6569	3	4364	2	3	2	12462	3	2	5192	3	2	3	2	3	2	3	2	3	8039	7234	2	3	2	3	5218	5717	2	3	2
1351	4992	12318334	55	55_4992	37939	31615	24468	69982	70352	47637	83078	3	82790	62632	23222	53487	2	54033	56742	7136	17575	43808	50437	36891	45061	31368	42817	44077	41382	53088	50195	42432	36070	30817	38506	46537	30488	45403	52513	52969	43754	30091	90016
1352	5038	12395000	55	55_5038	81780	75115	81259	103523	87355	103903	83018	76446	59618	24846	10618	16940	79988	16646	80266	74575	81353	18179	15483	79061	17839	10524	12380	12357	12479	20657	17139	9533	80206	80673	10161	15134	11688	10209	10481	16737	11360	13188	17103
1353	5072	12451667	55	55_5072	81340	83009	76279	3	2	3	2	3	2	3	2	3	2	3	31295	2	3	2	3	2	3	2	3	2	3	2	3	2	3	2	3	2	3	2	3	2	3	2	3
1354	5113	12520000	55	55_5113	2	3	2	3	85074	2	99273	93450	3	2837	2308	1716	2	3	20187	2	68250	1207	2889	17926	3	239	1128	1752	3648	6414	2	3	2	3	1447	2	2474	997	1888	4045	1460	4524	3
1355	5151	12583333	55	55_5151	81018	78793	78139	90960	83610	86539	71908	67348	91178	6385	3593	3842	89527	2	101832	97423	101041	4306	3316	78447	3	2224	2384	2558	3138	5098	2705	1421	83494	94411	3484	3106	3620	2045	2072	4958	3206	2941	2703
1356	5195	12656667	55	55_5195	10662	9196	8727	16861	10886	11713	85896	79524	72182	3018	1483	1741	72290	2	6129	79989	85888	1331	2259	8094	3	1622	1379	1619	2808	4441	3207	2760	6971	6185	2273	3111	2200	1595	1651	3236	1943	2484	2851
1357	5238	12728333	55	55_5238	5419	4729	4645	8090	5508	6124	2	3	2	1190	564	938	3	2	2950	3	2	3820	1081	3162	3	674	480	698	1099	1341	756	1323	3423	2887	808	1262	888	892	805	1706	769	946	1799
1358	5285	12806666	55	55_5285	2	3	2	3	2	3	2	3	2	6595	3	2	3	2	3	2	3	2	3	2	3	2	3	2	3	2	3	4599	2	3	2	3	2	3	2	5176	3	2	7396
1359	5292	12818334	55	55_5292	7081	5803	5437	13326	10286	8235	20225	11824	13867	9622	2031	6362	16034	3314	7896	13504	16482	5045	7079	5939	2118	3322	4532	4990	5416	6539	6194	7272	4954	4003	3023	6159	2858	5532	7378	8407	5450	2199	11857
1360	5325	12873333	55	55_5325	7713	5769	5038	15598	12369	9183	3	10426	12755	2182	2318	4433	15370	2	6841	9390	14755	3191	4265	3	2	2381	3152	3498	3477	4570	4272	3	6045	4206	4429	3708	2	3656	4219	3	3632	3062	2
1361	5358	12928333	55	55_5358	3	2	3	6581	2	3	2	3	2	3	2	1486	3	2	2682	3	2	1382	1748	3	2	3	2	3	2	1956	3	2	3	2205	2	3	2	3	1341	2	1274	3	2
1362	5397	12993333	55	55_5397	2279	1933	2015	4371	2808	5538	12564	4441	1706	1488	763	741	4984	3	1700	4534	8979	1153	1217	1197	2	437	484	643	859	1736	786	2391	1783	1442	612	935	994	818	698	1328	856	641	1614
1363	5439	13063334	55	55_5439	4909	4211	4908	4358	5417	4298	18720	5719	2794	3486	4684	3599	4825	3	4047	7135	12183	5218	4134	3870	2	3090	3218	3067	3829	4064	3103	2137	6187	7590	5587	3397	5274	3003	2907	4197	4728	3652	4230
1364	5525	13206667	55	55_5525	77970	63248	67601	98928	82698	83383	105394	77462	86493	80771	76524	67328	78849	58029	90564	80088	100582	153685	64052	70318	64740	60549	63183	63511	91969	85928	59433	73696	81411	83833	80584	69618	81022	57938	55991	80674	71576	74883	68821
1365	5557	13260000	55	55_5557	3610	2760	2734	13955	9938	10101	6154	380	3	3596	1564	2887	3637	2	3765	261	2289	2501	2563	2702	3	1819	1999	2206	2656	2712	2134	2706	5130	3591	1801	2224	1906	2305	2375	3166	2073	1574	3939
1366	5595	13323334	55	55_5595	1648	1015	1093	2497	1578	1621	2	3	2	1023	594	909	1301	3	1398	2	3	814	1070	1025	2	635	538	725	1166	922	560	1022	1242	1105	302	959	613	732	781	1310	608	666	1521
1367	5637	13393333	55	55_5637	872	556	744	1702	1133	944	5791	927	1745	940	463	759	1448	3	1147	1034	2	466	766	867	3	442	395	663	650	898	730	899	651	652	349	688	467	701	754	865	595	441	1249
1368	5701	13500000	55	55_5701	449785	296992	244213	926777	784957	569524	324500	359881	620433	854295	189231	581031	701490	678552	644421	289292	367214	443506	640651	342574	502978	284854	393741	449350	488366	556610	559182	664242	386030	262944	418393	564942	264887	500968	668070	695151	511568	271360	981566
1369	5780	13631667	55	55_5780	13326	9523	8148	28981	21408	16199	12929	10993	17538	26081	7311	16949	19580	18687	17841	9640	11535	16257	19103	12505	13367	10324	13636	13519	14459	19607	14662	18143	11822	8513	11731	14810	8476	13359	15586	18991	13338	8744	25618
1370	5816	13691667	55	55_5816	4473	3737	3521	3787	2	3	6867	3432	5777	6814	1665	1954	9448	5138	12087	6989	7484	5492	7621	8329	7602	2845	3557	4148	4690	9531	6669	4221	5937	5042	5079	6024	3384	2	1943	3	4996	2733	6781
1371	5858	13761666	55	55_5858	2	614	483	3	2706	1956	2562	636	2	3498	870	2045	708	1298	2612	851	948	1673	2152	1978	1191	1056	1484	1656	2028	2390	1798	3	1384	817	2025	1890	907	1500	1854	2479	1949	625	3250
1372	5888	13811666	55	55_5888	2	3	2	3	2	3	2	3	2	3	2	3	2	1391	3	2	3	3046	2	1889	3	1595	1848	1933	2	2108	3	2	1635	235	3	2	1557	1747	3	2	3	2	3
1373	5923	13870000	55	55_5923	783	762	815	2256	2446	1550	3234	662	828	3006	869	1629	1263	1455	1819	1085	953	1648	1774	2976	1185	1400	1667	1605	1954	2739	2388	2594	1242	1442	1485	1853	1305	1485	1711	2113	1578	1273	1972
1374	6011	14016666	55	55_6011	2227	1619	1853	2220	1430	1865	1683	1588	2328	2311	877	1292	2502	1352	1802	2218	1878	1839	1239	1501	1752	1203	1108	1094	1464	2168	2087	1778	1600	1619	894	1512	1476	1463	1052	1596	888	1214	1997
1375	6078	14128333	55	55_6078	1601	1009	1000	2837	2031	1543	1252	1035	1984	2150	844	1226	2626	1835	2	1367	185	1273	1606	1591	1448	928	1278	1124	1808	1764	1143	2404	1265	1293	1675	1506	851	1311	1424	2619	1295	1303	2316
1376	6152	14251667	55	55_6152	40668	29287	31024	46193	25266	32360	28603	28969	52914	43243	18835	25581	54349	32459	47167	26161	34965	56214	35568	35690	36836	21225	26789	24759	40581	42853	26764	46540	27751	27944	27912	36068	21447	25979	27541	40811	32281	24522	49122
1377	6191	14316667	55	55_6191	372585	234340	200126	553276	231031	438399	312895	337061	637032	414176	137893	197934	659293	225913	196608	264673	388261	330559	355778	143954	124662	307473	241201	217951	117355	152806	87052	505209	201468	285971	77466	143522	42798	224249	216153	441130	72796	59648	193486
1378	6236	14391666	55	55_6236	36241	26218	28587	58927	33211	38670	41531	36570	61389	43330	30434	28375	51498	27147	36553	38053	44733	62420	30476	28009	27516	27292	28610	27702	38074	35087	23386	44080	32531	34192	30030	28111	29481	25474	25618	39318	26699	26973	28173
1379	6311	14516666	55	55_6311	1599	3	464	3518	1252	1206	2	3	2	1932	330	687	3	1157	902	2	3	1695	1233	1027	743	2	599	3	503	548	420	2239	2	871	3	536	2	3	797	1743	467	203	767
1380	6397	14660000	55	55_6397	2766	1170	623	10849	4335	3095	2010	1881	6728	2	581	2382	4822	4223	3434	984	1808	1921	2618	2726	2982	843	2009	2217	1578	2339	1819	5001	1727	1735	1405	944	1050	2316	2293	3649	1619	295	4008
1381	6428	14711667	55	55_6428	3407	1054	1105	9515	4232	3298	1200	848	6319	7392	710	2859	6087	3806	4571	1096	1630	2446	3768	2696	3033	864	2017	2342	2388	3488	2257	6067	2108	1523	2344	2294	1332	2695	3277	5474	2556	1093	5627
1382	6474	14788333	55	55_6474	395	3	2	1722	617	133	797	3	290	753	2	3	595	244	929	2	225	3	317	1325	583	162	2	376	3	847	648	433	2	414	634	399	3	427	182	453	2	244	3
1383	6538	14895000	55	55_6538	2	3	2	1385	473	367	3	2	260	644	3	406	336	484	2	3	2	497	3	934	2	107	3	2	3	2	288	401	3	340	2	3	2	3	241	197	2	3	2
1384	6571	14950000	55	55_6571	2442	3641	5200	2195	4655	2938	7054	5075	3140	1659	5909	3434	2447	3126	2552	6669	6756	11613	2238	3137	2383	4240	3595	4108	2253	2093	4359	1590	5736	6154	5501	2403	5700	3189	2875	1754	4780	4692	3143
1385	6653	15086667	55	55_6653	3	2	3	2	3	322	1991	1292	2387	2	3	2	3	2	3	807	691	2	3	149	2	3	2	3	2	3	2	500	3	2	3	2	3	179	2	3	2	3	2
1386	6708	15178333	55	55_6708	1007	432	449	3269	1191	1033	562	3	1705	2640	255	872	1625	1303	1135	2	605	1047	897	840	712	438	639	588	672	784	342	2171	515	475	271	517	231	616	760	1511	3	257	1118
1387	6756	15258333	55	55_6756	584	258	400	1483	551	762	586	2	1889	1239	3	2	1227	631	1174	375	660	879	3	883	2	369	287	3	2	751	282	1382	3	592	614	527	393	2	3	2	3	456	2
1388	6788	15311666	55	55_6788	4276	2547	2773	4332	2050	3096	2127	2419	5635	4512	1228	2073	6129	3264	4959	2058	3161	4895	3399	3194	3462	1681	2281	2093	3752	3960	1973	5288	2149	2551	2154	3427	1585	1873	2339	3658	2591	1865	4100
1389	6836	15391666	55	55_6836	2431	575	853	17916	1356	4319	1325	1768	18413	9648	842	1025	11262	3331	5250	592	4628	4726	2164	1642	1699	504	331	599	3029	4301	932	12945	1282	1049	1750	2037	883	1034	1503	5222	2588	1069	4184
1390	6891	15483334	55	55_6891	595	3	2	1259	3	2	378	3	2748	2	3	2	3	2	1030	399	1147	1409	3	806	2	3	2	3	2	879	381	3	2	454	3	490	2	3	2	3	2	3	2
1391	6939	15563334	55	55_6939	1869	1312	1561	829	3	422	452	545	1441	402	2	3	1514	352	1659	661	1342	425	2	1236	1131	3	2	164	425	1596	1212	764	3	2	1292	3	860	2	3	329	1549	1161	1269
1392	6968	15611667	55	55_6968	2	3	2	454	3	351	345	2	769	3	2	3	513	206	2	3	571	2	3	260	2	3	2	3	2	459	256	397	3	2	3	2	3	2	3	2	314	3	2
1393	7005	15673333	55	55_7005	7461	4383	4624	12139	4363	6933	5293	5427	12838	8508	2797	4330	10965	5497	8697	3611	7153	9074	6253	6692	6083	3311	3838	3677	7040	8725	4388	12346	4945	4170	4799	5897	3377	4482	4420	8918	6037	4006	10201
1394	7068	15778334	55	55_7068	329	3	2	797	3	477	2	3	442	599	2	3	547	478	482	2	3	405	409	216	414	204	2	282	338	475	3	711	2	208	336	3	2	3	225	500	289	2	616
1395	7104	15838333	55	55_7104	21390	11139	9999	30124	7112	11790	8635	5647	33958	20850	4825	9228	13150	7910	20230	5021	6011	14027	14185	6891	12353	7928	11609	4578	14392	10029	5215	23980	14567	5912	7739	16450	10121	9842	12765	16713	13190	8475	14450
1396	7148	15911667	55	55_7148	3	2	729	3	2	3	1123	2	3	2	3	509	2	3	680	2	3	474	2	795	3	2	3	2	3	2	3	665	2	3	2	3	2	3	2	3	2	470	3
1397	7211	16016666	55	55_7211	2	3	2	3	2	163	3	2	363	3	2	3	2	3	151	2	3	635	2	209	3	2	3	2	3	2	3	224	2	3	2	3	2	3	2	3	2	201	3
1398	7268	16111666	55	55_7268	6657	4985	6676	3613	1761	2644	12420	9800	15497	3226	1280	1657	18139	2047	19918	15310	18530	3428	2309	15391	13802	1506	1552	1640	5137	20310	11939	4114	1877	1743	15327	15833	13272	1609	1875	3079	16657	12440	14240
1399	7342	16235001	55	55_7342	2642	2	3	2	3	2	3	2	3	2	3	2	3	2	3	2	3	2077	2	3	2	3	2	3	2	3	2	3	521	2	3	227	2	3	2	3	2	3	2
1400	7372	16285000	55	55_7372	14139	6778	7103	23020	6510	12179	6823	6694	23806	16845	3473	6263	20807	8605	15176	6206	9756	18482	10861	9836	10045	4211	5879	4426	12381	14212	6004	20799	6488	6418	7827	9791	6636	6040	6048	15327	8749	6194	14227
1401	7409	16346666	55	55_7409	3	2	3	2	3	2	3	2	3	2	3	2	3	2	155	3	2	221	3	2	3	2	3	2	3	2	3	2	3	132	2	3	2	3	2	3	222	2	3
1402	7520	16531666	55	55_7520	2	3	405	2	3	165	781	671	798	2	3	2	508	3	489	553	510	2	3	433	2	3	2	3	2	229	3	179	2	3	2	3	2	3	2	3	2	3	2
1403	7583	16636667	55	55_7583	662	364	460	930	289	614	386	404	1091	732	239	3	1098	324	878	2	578	915	496	615	883	217	3	239	650	1093	457	1018	2	262	363	723	258	324	311	618	517	309	657
1404	7627	16709999	55	55_7627	3	2	3	2	3	2	277	3	239	2	3	2	3	2	229	3	2	3	2	287	3	2	3	2	3	2	3	180	2	3	2	3	2	3	2	3	2	3	2
1405	7770	16948334	55	55_7770	3	2	3	727	2	271	3	2	786	549	3	2	708	204	317	3	231	835	2	192	3	2	3	2	3	2	3	731	2	214	3	2	3	196	2	513	3	2	3
1406	7830	17048334	55	55_7830	515	2	3	1340	299	467	2	3	1104	999	2	3	886	259	435	2	246	885	487	368	323	131	3	180	375	451	2	1593	3	227	2	3	2	258	242	797	3	2	493
1407	7881	17133333	55	55_7881	3	2	3	2	3	2	3	2	3	2	3	2	3	192	2	3	2	3	2	3	2	3	2	3	2	3	2	329	3	2	3	2	3	2	3	283	2	3	2
1408	7937	17226667	55	55_7937	8113	3442	3113	16694	3507	7542	3719	3316	16643	11831	1833	3195	12350	4434	7745	2709	5632	12283	6095	4803	5094	2065	3046	2063	6719	7913	2485	16450	3553	3160	3355	5327	2020	2932	2966	9601	3774	2324	7053
1409	7977	17293333	55	55_7977	17660	13197	19037	21369	11381	17215	76730	69920	102283	6747	3263	1765	76268	463	45315	67752	80869	825	3	21362	856	2	3	2	1004	1819	3	2	13529	991	1240	663	264	131	313	690	1026	812	3
1410	8100	17498333	55	55_8100	2	3	2	3	1769	196	1115	290	1717	1634	215	2	1603	3369	369	621	1059	3	2	230	3	97	2	3	2	3	2	418	3	2	3	2	3	2	3	578	2	3	2
1411	8142	17568333	55	55_8142	3	2	3	429	2	390	3	2	1228	467	3	2	1038	211	3	601	885	518	2	313	3	155	2	3	2	224	3	501	2	158	3	2	3	2	3	318	2	3	2
1412	8203	17670000	55	55_8203	3	2	3	2	3	2	436	3	404	2	3	2	643	3	534	452	501	2	3	323	2	127	3	2	3	599	254	2	3	2	490	491	362	3	2	3	464	275	2
1413	8411	18016666	55	55_8411	3	2	3	429	2	403	3	2	199	338	3	2	274	3	152	2	3	330	2	149	3	199	2	3	2	3	2	262	3	2	3	2	3	2	3	2	3	2	3
1414	8558	18261667	55	55_8558	2	3	2	3	2	3	2	3	2	387	224	3	2	592	3	2	3	1308	842	2	3	874	741	685	2	3	2	1798	3	281	2	3	2	585	684	780	3	2	3
1415	8650	18415001	55	55_8650	2	3	2	3	2	3	2	3	2	3	2	3	2	633	3	2	3	1046	714	2	3	904	734	791	2	3	2	1813	3	415	2	3	2	895	1198	1017	3	2	3
1416	29	4046667	56	56_ 29	98963	97928	66850	82124	71026	87124	85148	83647	2	93728	97843	85593	68734	85344	90432	61233	87551	93774	3	93425	84837	85983	78228	91860	92333	93057	81368	2	93011	95142	99512	90407	93306	81170	75473	87676	92953	81842	87076
1417	84	4138333	56	56_ 84	3	2	3	2	3	2	2448	2002	6613	3	2	3	2	3	329	1360	397	2	3	2	235	3	189	2	3	2	3	2	3	2	3	2	3	2	3	2	3	2	3
1418	137	4226666	56	56_ 137	39368	37078	50675	14487	20177	20416	29944	21819	23660	21964	40301	28221	24292	34237	28259	35598	37832	45061	46800	26967	44330	55456	48706	54887	34239	75778	105290	66444	40670	53914	82561	100793	123688	53696	59534	71936	93688	98979	116785
1419	197	4326667	56	56_ 197	2226	2651	3929	1782	1462	1183	5526	5790	7954	1474	1477	1393	5838	1338	7115	6905	6060	1450	2100	6056	7236	2	1940	1817	2301	6660	5589	1627	2623	4702	4323	5478	5668	1693	1414	2138	3	2	3403
1420	243	4403333	56	56_ 243	3	2	3	2	3	2	3	2	3	2	3	2	3	2	3	2	3	2	3	2	229	3	2	3	2	3	164	2	3	2	407	3	2	3	2	3	2	3	2
1421	272	4451667	56	56_ 272	13117	11744	20350	18264	20022	16435	33098	27699	36228	13716	18593	13232	24482	10389	19387	26926	24230	17879	16255	18549	16056	16031	15263	15463	13369	17282	16601	16384	23344	18626	18374	14925	19518	13876	13710	16197	22359	16784	14766
1422	312	4518333	56	56_ 312	4331	4287	6753	6704	8085	8551	11677	8045	5958	4720	10596	8574	3602	6631	7035	12341	12495	5699	6545	7342	7083	7881	8103	6791	4826	7243	5989	2356	10346	9464	10049	9168	12366	6815	7281	5617	9876	10650	8163
1423	348	4578333	56	56_ 348	1127	766	859	1295	2047	1987	2137	2791	1852	1323	1122	3	2011	2205	1982	2119	3342	706	2	3173	2345	1907	1990	1983	3	1645	2502	2	3	1161	3077	2491	2424	1782	1495	1731	1318	2883	2197
1424	413	4686666	56	56_ 413	2021	1996	2566	4400	4539	1988	3583	2233	3335	3105	1833	2912	5546	3050	3963	3209	2590	2003	2207	1890	3929	2371	3103	2964	3950	3997	3192	1897	2877	2371	3372	2792	3314	2116	2509	3975	4283	3500	5124
1425	468	4778333	56	56_ 468	2	326	641	1436	3	1194	2	420	3	704	909	618	954	2	3	1044	688	471	725	458	1090	999	939	876	622	1124	364	346	1233	1229	737	774	823	656	2	3	2	3	528
1426	517	4860000	56	56_ 517	2	1018	1582	920	1509	1553	1381	3	2	381	2084	1835	3	642	2	1957	3	2	1176	3	2	2697	1032	1682	1026	3	754	2	1557	3	1457	2	3	1399	1138	1918	2	3	2
1427	561	4933333	56	56_ 561	3	2187	3457	3075	4288	2987	2033	2	3	1400	2575	2144	746	1263	2	1769	1357	1566	1393	1172	1001	482	3	2	3	1144	2	3	3861	20743	1305	1346	2227	1139	1034	1134	1661	1761	1116
1428	605	5006667	56	56_ 605	1021	1324	1949	908	2	3	2	1331	1195	3	785	574	2	3	1226	2	899	3	2	1186	3	2	827	3	779	1223	2	706	3	3894	1733	1025	1070	2	3	445	2	375	3
1429	685	5140000	56	56_ 685	1507	2	1371	1555	1052	785	1401	1543	742	632	1341	941	1262	1034	821	1191	1383	3	1142	858	708	560	1269	1286	1253	739	1009	2	2988	2883	1431	1289	1480	947	896	689	1519	1414	926
1430	717	5193333	56	56_ 717	36568	26908	31661	46882	38514	32124	52402	46731	54766	23142	22916	7895	24640	15209	22794	26538	32486	19601	20912	33269	17576	12032	11779	18228	13892	17037	18328	10199	50889	27628	26161	19127	21972	10200	14813	9476	18324	24270	13367
1431	755	5256667	56	56_ 755	3408	3348	3693	4062	4096	5063	3822	4325	5724	4530	3616	3	4653	4084	4514	3886	4142	4500	4037	4665	3874	4199	3914	3941	4657	4539	4327	4238	4371	3852	4428	4369	4156	3787	3714	4012	4973	4580	4195
1432	811	5350000	56	56_ 811	974	1299	2	3	1289	963	916	1041	972	507	1274	1112	1676	603	774	511	2	569	1120	608	862	1746	290	1444	514	933	848	3	1491	1212	692	613	2	592	668	1048	1187	1125	572
1433	843	5403333	56	56_ 843	3	2	3	2	3	318	2	3	2	3	2	3	2	3	2	3	2	3	2	3	2	319	3	460	2	3	2	3	293	2	3	2	3	2	3	130	470	2	3
1434	882	5468333	56	56_ 882	33130	42636	35664	4361	2630	2405	125646	97849	62041	1635	3984	3920	50132	4015	12412	65776	43613	3690	9366	5493	8212	4089	3812	4594	3189	14056	4671	1994	44531	44525	2	4233	4318	3457	3889	4038	4330	11959	3986
1435	931	5550000	56	56_ 931	2353	3	2	1851	1387	3	2	3	2726	1109	2484	2	3368	1582	3	3684	3278	1979	2953	1711	2303	2057	2183	2238	2273	4328	2	3	2	3	2	3	2	1712	1810	2265	3	2	3
1436	980	5631667	56	56_ 980	16213	2	14756	11355	6827	6871	43075	43628	75117	6232	6013	2453	33007	6125	14904	30290	28387	6874	7144	10102	9688	4356	5296	5031	7820	9985	7069	4587	27779	18610	9380	7497	7543	4592	5976	7487	9110	10889	8632
1437	1015	5690000	56	56_1015	3	5075	2	3	202	2	3	2	3	2	3	4166	2	3	2	3	2	3	2	3	2	3	2	3	2	3	2	3	2	3	2	3	2	3	2	3	2	3	2
1438	1061	5766667	56	56_1061	6107	3703	5395	6752	6657	8162	6091	5710	6963	7034	6578	6020	6236	5773	6117	5955	6327	6858	5104	5177	5126	5300	6329	6054	7010	5666	4759	8039	8126	6896	7315	5679	5361	7050	7195	6924	6335	5578	5155
1439	1112	5851666	56	56_1112	349	656	1003	467	866	3	1366	2	173	242	612	780	996	1586	482	466	3	2414	658	937	593	1024	762	854	2	741	947	2198	848	723	3069	1367	1365	950	1347	1416	4658	1255	1720
1440	1171	5950000	56	56_1171	1670	1788	2994	1219	1288	2391	3646	2204	3042	1487	2657	1437	2560	1403	1932	3210	2538	2843	1870	2400	2075	1988	1380	2042	2991	2291	1937	2757	3825	4063	4285	2208	4056	1579	2213	3	4384	3414	2242
1441	1219	6030000	56	56_1219	4353	3628	4427	4115	3328	4046	6349	5632	6847	3548	3266	2800	6085	2007	8341	6500	8109	4881	5969	6253	10164	4573	3698	4565	10167	7148	6323	3832	4221	2655	5739	7417	6797	3817	3549	4730	4879	7470	6829
1442	1251	6083333	56	56_1251	1840	2230	3272	1398	2238	2047	3061	2652	1761	1443	2	3	2349	1241	2	4042	3819	1712	3	2904	4471	2	1629	3	2337	4608	4606	2	4132	3429	2326	4837	5641	1583	1891	1057	1799	4693	4095
1443	1296	6158333	56	56_1296	2359	2360	1996	599	1061	863	11705	10094	6572	636	3145	2094	1699	854	3939	2002	1643	682	2304	451	2478	2592	809	2119	3	1818	1470	2	3953	9172	2396	798	1587	975	1226	552	1021	1283	1605
1444	1331	6216667	56	56_1331	1416	1407	1383	3	2	338	1841	1668	1348	3	804	1024	1165	415	1405	1096	1312	2	1138	3	934	1304	2	1655	3	1702	341	2	3	4044	608	338	2	3	2	3	2	1625	3
1445	1337	6226666	56	56_1337	2	3	2	3	2	3	2	1340	3	2	3	2	3	2	1711	3	2	3	884	2	3	2	3	189	2	3	2	3	2	3	2	3	2	3	2	3	2	3	2
1446	1385	6306667	56	56_1385	3	2	3	979	2	749	1528	2152	3112	583	3	2	1938	3	2	3	1798	2	3	2	1626	333	3	2	817	1990	3	695	2	3	2057	1386	1761	2	3	2	2127	1494	1313
1447	1429	6380000	56	56_1429	15328	16712	16765	31119	18949	12238	41729	37006	26845	14063	11397	9811	19253	2192	18884	21417	18181	3150	3139	2724	19423	2442	2962	3749	6995	21788	14294	676	30988	25486	9200	14432	15387	3014	1856	1329	6259	11014	13713
1448	1458	6428333	56	56_1458	3	631	319	1001	4904	2770	2	858	3	796	4843	4700	2	403	3	2	3	410	438	2	3	2	334	397	3	2	3	2	3	2	3	2	3	203	2	536	3	2	3
1449	1492	6485000	56	56_1492	2	3	2	3	896	1391	2	3	2	3	538	2	3	2	3	2	3	2	3	2	3	2	3	2	491	3	2	3	2	3	2	3	2	3	2	3	2	3	2
1450	1555	6590000	56	56_1555	3	2	3	2	3143	2681	2714	2471	2661	2478	2638	3	2489	1909	3465	2086	1965	1888	874	2553	2637	2030	2039	2156	3325	2867	1938	1506	2	3	2474	2575	1908	2221	1925	2	4456	2789	2931
1451	1561	6600000	56	56_1561	1890	2175	2615	4056	1900	5055	2409	2919	4794	3035	1777	2992	3725	3052	2014	1726	2551	3750	2802	2768	2033	1410	2194	1568	2823	1935	2536	2997	2862	3219	3775	2150	1880	1877	2151	2607	4850	2379	2487
1452	1635	6723333	56	56_1635	9689	1152	3	2	3	8925	2	3	2	7140	3	2	12097	3	2	3	2	7596	3	7164	2	3	2	3	2	3	2	7145	3	2	7285	3	2	3	2	3	7277	7975	2
1453	1672	6785000	56	56_1672	19038	8545	19923	8329	7956	11371	54796	54997	80533	10892	7703	7741	36496	6486	9377	37531	32416	8812	8770	8059	8348	8221	6927	7894	9167	8789	8141	3788	30359	24622	10096	8097	8399	6921	6684	9544	14824	12372	7703
1454	1677	6793334	56	56_1677	3	15343	9890	8555	9963	2	3	2	3	2	9490	4858	3	2	3	11037	11572	2	6451	3	2	3	5608	6042	8978	10708	7684	2	10992	9966	3	9065	12402	4660	2	3	2	3	7528
1455	1732	6885000	56	56_1732	5134	5735	7067	4064	3168	2557	8811	7673	7801	3858	4563	4519	9183	5766	15970	10286	12988	2	7895	3	14917	5719	2	3	2	6464	3	2	4947	5113	3	2	3	2	6298	7507	4738	11389	3
1456	1778	6961667	56	56_1778	6358	5999	7480	2688	2966	2545	5064	4428	3613	2685	4313	4051	4545	4120	471	5913	6190	4888	6783	4535	7937	7541	5864	7865	5489	13404	16463	9984	6476	7901	12841	18356	24887	7444	9501	16094	19440	19174	26538
1457	1799	6996666	56	56_1799	2	3	2	3	478	2	3	739	2	3	2	960	3	2	3	663	754	2	3	2	679	3	2	3	2	3	2	3	2	3	2	3	2	3	2	3	2	3	2
1458	1828	7045000	56	56_1828	825	776	1342	3	597	1099	795	757	580	530	865	950	990	666	1776	997	1170	748	801	1044	1837	991	446	699	2	1712	2472	3	1529	1598	767	2729	3223	523	456	2	2661	2421	3
1459	1896	7158333	56	56_1896	3850	6240	10205	648	5763	3546	9097	12357	15452	2	6616	6608	12189	6626	6880	7978	9381	3931	3880	6454	4678	9156	5608	6140	980	5667	10134	3001	12814	7148	5357	9002	7972	6644	4183	4734	7944	7077	6432
1460	1897	7160000	56	56_1897	3	2	3	1940	1827	2	2226	3	2	1588	3	2	2701	3	2	3	2	3	2	3	2	3	2	3	2	3	2	3	2	3	2	3	2	3031	3	2	3	2	3
1461	1956	7258333	56	56_1956	6037	4752	4440	2	3	2685	9509	9474	2	4447	3	2	11474	1492	3	8470	8557	1795	1970	7193	13674	2	752	1606	3094	6836	4087	3	4481	4519	1320	4002	4178	580	1010	374	2036	6324	5856
1462	2000	7331666	56	56_2000	12797	12787	14051	4706	3501	3388	50783	44752	69151	6950	3018	3916	43291	7090	16873	45212	44742	8359	11042	13336	29863	5671	4979	6947	6903	14205	13187	3014	14178	9970	6517	11140	10974	3680	4857	5086	6111	9990	9063
1463	2030	7381667	56	56_2030	1051	2	3	5206	4557	678	1878	1109	2387	930	5959	6479	2	369	22296	3	2	457	3	718	806	2	585	483	523	3	1047	2	3	2	423	249	3	517	446	921	2	402	570
1464	2046	7408333	56	56_2046	3	964	984	2695	1498	2	3	2	3	2	1099	1195	3	2	3	2	593	3	2	3	2	3	2	3	2	3	2	3	2477	2759	2	3	2	3	2	3	273	2	3
1465	2088	7478333	56	56_2088	2	1222	2162	3	2	3	2	3	2	3	2	3	7000	2	3	2	3	2	3	2	3	2	3	2	3	2	3	2	3	2	3	2	3	2410	2	3	5893	2	3
1466	2124	7538333	56	56_2124	28941	29368	29942	65837	57383	63752	74454	69079	91814	65271	45676	38363	55532	4975	2	59667	58624	5500	9292	7181	8685	4382	8320	13464	7386	11392	5539	3990	46137	59011	7450	6443	13204	4858	8731	3887	18365	9904	5362
1467	2152	7585000	56	56_2152	3	2	3	2	3	2	3	2	23597	3	2	3	2	6187	3	2	3	2	3	7502	2	3	3187	2	3	2	7553	4111	3	2	3	8396	5942	2	4005	4738	7629	3	8000
1468	2182	7635000	56	56_2182	2	3	2	45103	3	2	31217	35382	48102	36051	3	2	40547	31220	41675	43596	45809	9341	3	37165	15851	37984	34685	2	9374	3	37145	31847	2	3	32032	38293	38585	34017	33866	42029	32979	13577	38861
1469	2255	7756667	56	56_2255	4752	7499	8916	3868	9310	6325	5180	8534	3367	3338	5808	8932	5469	8116	7152	6302	6561	4408	6495	11714	8820	9292	7328	6602	6044	6942	11688	3183	6799	6063	6697	7195	5781	8709	6633	5827	6423	6673	7853
1470	2330	7881667	56	56_2330	2	3	2	3	2	3	2928	2836	1974	1468	2	3	2	3	2	3	2784	2	3	2	3	2	3	2	3	2	2523	973	3	2	3	2	3	2	1637	3	2	2981	3
1471	2366	7941667	56	56_2366	6111	6016	5722	7586	5754	4893	9235	7965	9133	6275	5736	5937	6405	4886	8919	8510	9210	5247	7517	6647	7187	6348	1961	6910	8820	8452	6755	6992	6401	1784	6077	6929	8544	5579	4737	8568	5068	8007	6571
1472	2406	8008333	56	56_2406	2	3	1050	2	3	313	2	3	2	3	2	3	2	3	2	3	2	3	2	3	2	3	2	3	2	3	2	3	2	3	2	3	2	3	2	3	1143	2	3
1473	2413	8020000	56	56_2413	1042	1170	1911	757	667	1597	4569	2995	3459	621	639	648	2339	1314	2	2582	2732	3	656	2	3	394	2	3	2	3	2	913	1416	3	1671	2	585	3	2	327	1561	3	2
1474	2452	8085000	56	56_2452	1844	2046	3	2	3	2	3	2	2573	3	2	3	2381	2	3	2	3	2	3	2	3	2	3	2	3	2	3	2	3	2	3	2	3	2	3	2	3	2	3
1475	2490	8148334	56	56_2490	941	1335	1596	2437	2288	207	7447	6346	5396	1675	1751	1616	1232	2	3223	2699	1777	900	1901	2219	2412	1578	1401	1689	2244	2678	1746	529	5669	2897	649	2136	2073	1405	1073	1578	300	1101	2102
1476	2502	8168333	56	56_2502	3	2	3	2	529	3	2	3	2	832	3	2	3	2	925	3	2	3	834	2	434	253	263	372	971	245	387	3	2	1618	3	424	458	468	2	639	3	2	649
1477	2540	8231667	56	56_2540	543	378	3	642	624	2241	667	1055	1931	1143	355	2	1529	902	357	734	1115	1004	3	978	536	2	735	456	3	733	858	1089	249	2	1554	706	712	445	636	1074	3	928	746
1478	2601	8333333	56	56_2601	4611	2895	3699	1479	1957	2	3	2	3	2085	1699	1374	2	3	5763	8459	9263	2458	2	3	2	1792	2103	1883	3044	3	4445	2943	2683	2	5292	5874	5203	1799	2283	1120	4106	3	4444
1479	2640	8398334	56	56_2640	50534	30289	35893	13874	9684	9205	146276	146091	238741	11067	9503	9517	137578	8507	19218	118480	106442	8518	11314	12011	11609	8415	8803	9201	10945	13907	8809	8751	45288	2192	9340	9822	8828	8495	8287	10826	8872	10284	11117
1480	2679	8463333	56	56_2679	3425	2617	2	3298	942	2498	1474	3	2	4127	3	807	2	1876	4372	3	2	2747	3	2504	3518	645	898	678	2	3	2	3	2	3	2332	3161	2	894	663	3	2	3370	3
1481	2756	8591666	56	56_2756	6227	7567	7005	13429	10750	5945	19320	19093	21049	8784	9327	9904	10129	4502	11250	7124	7935	3909	9633	2788	8182	6854	4446	7787	3127	12330	2473	2247	13087	13851	2354	3125	2791	4890	5562	1793	1988	5627	2519
1482	2827	8710000	56	56_2827	2598	1991	1764	2791	1778	1293	2341	2473	3026	1832	2231	1963	3603	1908	2730	2803	2272	1767	2877	3565	2622	2511	1514	1917	2161	2788	2622	2051	2290	2394	1861	2945	2142	1640	1888	3856	1743	2365	3293
1483	2885	8806666	56	56_2885	2848	571	946	4363	3261	5024	3685	3152	3044	4826	1155	751	2651	2	716	2518	1421	2101	402	1482	631	403	2064	556	956	661	2239	1983	2721	937	2580	784	922	632	1404	590	2527	768	1161
1484	2943	8903334	56	56_2943	22628	4715	5664	43381	28929	49708	4602	4165	15527	59737	4022	2727	7898	30778	2332	1994	1395	26974	9870	8337	1559	10644	34318	7636	2939	2105	4815	68533	13848	4314	2961	3323	1718	23738	40261	21317	3583	2114	5105
1485	2976	8958333	56	56_2976	1582	3	2	3	2	3	2	3	2	3	2	3	2288	2	2803	3	2	3	632	1579	2	3	636	2	3	2	3	2	3	2	1345	1370	3	2	729	2272	996	3	580
1486	3010	9015000	56	56_3010	1160	1217	1006	2972	1879	940	2460	2	3323	1303	1139	1231	3168	1453	1652	1803	1888	876	1568	1907	1176	1229	1659	1100	872	954	1054	1041	1596	1605	849	839	587	1380	1758	1180	659	931	1818
1487	3046	9075000	56	56_3046	309	3	409	1400	825	131	265	2	3	660	503	486	2	433	469	3	394	2	3	2	205	234	3	340	350	415	396	2	446	479	217	482	413	552	3	2	314	373	564
1488	3076	9125000	56	56_3076	3	2	3	583	334	2	1216	3	2	3	2	3	2	3	2	3	2	3	2	3	140	193	2	3	2	3	320	2	3	2	3	2	3	2	3	2	3	2	3
1489	3122	9201667	56	56_3122	865	459	591	998	816	740	2	1414	1481	936	637	630	1612	620	1215	1176	1086	3	761	1214	834	624	510	641	1067	1013	613	691	605	552	1187	842	799	391	567	755	605	785	1301
1490	3155	9256667	56	56_3155	2347	2403	2225	3477	3156	2190	2618	2081	2474	2796	2230	2710	3580	2656	3972	2569	2380	2154	2815	3344	2797	2124	2564	2569	2882	3212	2676	2218	2905	2889	3309	2520	2698	2305	2338	3160	2346	2607	4854
1491	3203	9336667	56	56_3203	2	3	2	3	2	128	3	2	3	2	3	2	3	2	3	2	3	2	3	2	3	2	225	563	3	2	3	2	3	2	3	2	3	2	3	2	3	2	3
1492	3234	9388333	56	56_3234	971	940	782	2	663	407	804	651	1366	3	2	3	739	2	1253	3	748	2	3	1113	1107	439	475	385	632	1193	885	2	1730	1247	871	1004	1290	548	3	2	481	846	1762
1493	3289	9480000	56	56_3289	3778	3	2442	3541	2	3	2	3	2	2485	912	624	3	933	1672	2	3	2	3856	4933	2771	3	959	2	3	2	704	892	3	2	3	1807	1627	252	1427	1054	2	1428	3494
1494	3319	9530000	56	56_3319	4332	3629	2267	2575	5895	4821	22841	24610	49220	5135	2883	3641	9302	5088	3142	5466	5352	5630	2067	2526	2648	3815	5101	3639	3162	5757	3276	4220	3713	3449	1875	1819	1494	4838	5088	3667	833	2813	1855
1495	3365	9606667	56	56_3365	5236	4266	4283	9578	5500	7289	10415	8551	14805	10911	6283	6989	13058	914	13804	9459	9844	3	3097	8057	11176	276	1525	1179	5264	9508	1084	1503	3944	3939	2674	5906	2039	2	1307	2263	1072	5520	2280
1496	3418	9695000	56	56_3418	315	538	575	704	273	3	2	177	3	536	692	378	363	2	3	2	618	3	749	2	1018	681	197	589	529	1469	734	500	460	503	3	712	440	315	2	3	2	3	1739
1497	3456	9758333	56	56_3456	254	310	2	3	2	3	2	3	2	626	3	2	3	2	3	2	3	2	539	3	2	3	257	2	3	2	3	2	3	2	3	2	3	2	3	2	3	2	3
1498	3502	9835000	56	56_3502	1324	1031	836	814	706	598	1143	804	1829	1101	483	590	1387	721	2	1237	922	586	912	1157	401	718	745	790	1027	1494	3	1089	422	844	1526	2	1439	635	802	1026	1351	1634	2022
1499	3549	9913333	56	56_3549	3	2	3	2	3	297	2	3	2	3	2	3	2	3	2	3	2	3	2	3	2	3	2	3	2	315	179	3	256	2	3	2	3	2	3	2	3	2	3
1500	3588	9978333	56	56_3588	1087	965	984	1198	855	547	2	399	544	1510	568	731	993	735	1262	3	657	770	1290	1275	1319	991	1052	1030	1245	4272	2220	1360	540	735	2520	3770	2206	936	983	1265	2755	2746	2526
1501	3618	10028334	56	56_3618	2	3	2	3	2	3	2	3	2	3	2	3	2	3	2	3	2	3	2	3	2	3	335	2	3	2	358	3	2	3	427	2	3	2	3	2	274	3	2
1502	3648	10078333	56	56_3648	2946	2761	2324	4637	3052	2444	2171	1264	1786	3153	2150	2120	3924	1742	2884	2159	1650	1672	3052	2983	2279	2012	2217	2014	2848	2699	1846	2544	2753	2382	2418	3308	2313	1861	1877	2751	1534	2112	3593
1503	3686	10141666	56	56_3686	1952	1793	1361	2391	1956	1370	1553	1398	1609	1883	1124	1864	2265	1715	2726	1278	1590	1558	2710	3276	2570	1529	1434	1969	2053	2142	1904	1869	1849	1767	1894	4273	1580	1917	4832	8245	2694	1880	3595
1504	3717	10193334	56	56_3717	3	2	3	2	284	54	3	2	433	3	2	3	2	3	741	2	3	2	3	2	728	3	2	3	533	2	3	2	332	3	2	700	3	2	3	682	2	3	885
1505	3783	10303333	56	56_3783	1107	2	3	1399	247	666	929	988	2270	1125	2	3	1886	319	4389	1149	1659	348	1030	1047	1824	2	3	126	577	810	272	2	145	3	2	3	2	3	2	198	153	130	3
1506	3850	10415000	56	56_3850	2	1658	1224	4033	2647	2544	3	9031	15718	5431	2157	2686	2347	1696	1957	2243	1954	2578	3646	2170	1532	2430	2327	1889	1338	2	1351	3535	1432	1699	1585	2486	1401	2074	1985	613	1283	1191	1617
1507	3873	10453333	56	56_3873	3	2	3	2	3	2	3	426	575	2	3	2	3	2	3	2	3	2	3	395	436	448	201	2	3	2	394	3	2	3	396	611	490	374	2	532	370	648	710
1508	3936	10558333	56	56_3936	1193	3	2	492	504	3	866	752	1078	518	2	3	1176	487	1077	897	829	2	503	1208	914	238	493	448	401	916	1064	697	525	693	767	1025	967	477	765	718	786	816	1143
1509	3988	10645000	56	56_3988	13360	12184	11484	2963	2559	3644	3665	4024	4688	6648	3704	4541	8625	5257	18865	8686	8928	4695	7854	20906	40170	8454	6669	7243	4059	26687	36843	6612	2520	3767	10994	20501	29073	6465	6986	6392	15878	16164	32205
1510	4025	10706667	56	56_4025	1136	651	725	3	343	477	2	645	3	2	481	433	1015	3	2	763	824	3	503	1156	1305	458	347	475	337	1296	911	2	440	3	683	1179	1083	2	446	304	855	1059	3
1511	4078	10795000	56	56_4078	2	3	2	3	2	3	2	3	2	3	2	3	2	3	2	3	2	3	2	3	2	3	2	3	2	3	2	3	2	560	3	2	3	279	2	465	3	2	2231
1512	4101	10833333	56	56_4101	5889	4472	4902	9795	10653	5226	3771	3802	4514	8943	3759	8740	6421	9421	8200	3850	3600	3972	7610	5087	7520	4710	6683	7085	6058	7059	8080	5665	5969	4298	7158	6329	4612	6733	7644	8031	6152	4058	13994
1513	4160	10931666	56	56_4160	1689	1078	847	1936	1233	1350	1239	3	1306	1731	1164	1113	1715	1160	1984	1357	851	875	1504	1636	902	871	1417	921	1577	1135	1280	1246	1379	1416	2	1690	1440	1011	1041	1889	1259	1403	1628
1514	4188	10978333	56	56_4188	3	2	3	2	3	2	3	2	3	2	3	2	3	2	3	2	3	2	482	3	2	3	2	3	2	3	2	3	2	3	2	3	2	234	3	2	711	3	2
1515	4233	11053333	56	56_4233	3	1968	1819	3678	1766	2182	2668	2138	2768	2841	2886	1677	2960	2418	4241	3230	2365	1080	2423	2513	3459	1772	2740	1868	2682	3906	2655	2082	2937	3111	2263	3155	2921	1718	2471	3323	2782	3059	3053
1516	4294	11155000	56	56_4294	2	3	2	3	370	115	2	3	2	3	278	2	727	3	2	3	2	3	2	3	2	3	2	3	2	3	2	3	2	3	226	2	3	2	3	2	3	2	3
1517	4331	11216666	56	56_4331	569	2	3	997	486	550	462	690	1626	2	3	2	1624	3	1255	944	499	2	628	960	760	3	171	2	3	904	2	1218	498	603	750	3	297	2	3	2	343	3	337
1518	4411	11350000	56	56_4411	628	418	396	1406	1216	593	780	534	929	1361	456	924	1210	916	2	661	3	2	645	923	803	403	619	921	882	931	947	782	903	620	741	1020	322	796	1057	1065	731	756	1245
1519	4412	11351666	56	56_4412	3	442	520	2	3	2	3	744	2	3	2	3	2	3	2	907	3	2	3	2	3	514	434	2	829	3	2	1133	3	2	1002	1048	613	3	2	3	2	635	3
1520	4454	11421667	56	56_4454	2109	1789	1952	2010	1839	1195	1680	1672	2327	1621	938	1533	3080	1634	5057	2355	2403	1415	1457	4091	4783	1090	1395	1702	1805	6193	4387	1305	1425	1007	4474	5727	4243	1257	1908	1745	4839	4245	5086
1521	4510	11515000	56	56_4510	2	3	2	3	2	3	2	3	2	3	2	3	2	3	2	3	2	3	2	3	2	3	2	3	323	2	3	253	2	3	2	3	2	3	2	3	2	615	3
1522	4540	11565000	56	56_4540	2475	1869	1550	2290	1828	1505	1782	1354	3205	1615	1524	1770	2977	1738	3445	1590	1368	1929	2680	3013	1296	2049	2193	2134	1599	1340	2646	3886	1921	1734	2860	3964	2811	1557	2407	1140	2074	2448	3572
1523	4570	11615000	56	56_4570	769	2	3	2	1226	858	1074	900	3	2	3	2	1532	3	2	3	2	481	1093	1117	3	571	1077	920	872	2	864	1180	753	3	1084	1139	2	3	2	3	650	2	3
1524	4630	11715000	56	56_4630	2	3	2	3	2	3	2	3	2	3	2	3	2	3	271	2	3	2	3	2	521	192	3	154	351	424	262	2	89	3	2	345	3	187	2	143	262	249	3
1525	4675	11790000	56	56_4675	740	462	523	2	3	135	1766	1681	2323	548	587	411	1099	575	1498	673	796	544	780	1112	1435	549	723	523	488	1573	925	775	494	453	815	1367	985	401	757	687	830	1041	824
1526	4738	11895000	56	56_4738	2659	2100	1993	3931	2480	2863	2281	2148	4109	2811	2112	2901	3130	2081	3748	1752	2421	2316	2652	3822	2916	2156	2220	1981	3031	4223	3468	3717	2651	2045	2958	2875	2556	2772	2040	4338	3377	2933	5187
1527	4802	12001667	56	56_4802	2	3	2	3	2	128	3	2	3	2	3	2	3	2	178	3	2	3	369	2	3	2	332	300	3	2	192	489	3	2	3	2	3	211	2	391	3	2	3
1528	4839	12063334	56	56_4839	2	3	2	3	2	1611	523	3	2	2472	994	1822	3	1487	2	3	2	1374	1723	3	2	3	1095	1356	1003	2	3	1956	2	597	217	197	3	1045	1359	837	2	227	3
1529	4887	12143333	56	56_4887	3327	2611	2626	3307	2237	2521	3135	1310	2048	4665	1812	2282	1791	1850	7289	909	1602	2385	3142	5310	3472	1710	1924	1559	1714	4179	2185	3831	3270	2052	2784	3609	2479	1247	2532	629	2890	2890	3382
1530	4922	12201667	56	56_4922	9890	8045	7065	18860	19055	11819	8202	5894	12061	20490	6192	16500	16013	19900	18430	4816	6063	11026	17851	10873	15862	8875	11842	13616	13308	16513	17359	16372	10400	7647	13317	16963	8922	14136	18800	18888	15093	9197	31539
1531	4954	12255000	56	56_4954	2	3	2	4898	5224	4036	3588	3	2	2425	3	1743	2924	1303	2	3	3582	2	2030	3	2	3	2	3	2	3	2	3	2108	1709	2	3	2	1289	3	1779	2	3	2
1532	4992	12318334	56	56_4992	16309	15389	10805	31298	34247	20898	11672	10648	9557	30669	11016	26473	17610	28981	27580	6068	11534	21266	24713	18251	25052	15709	21142	21857	19966	25781	24683	20608	16830	14111	18922	22393	14909	22137	25725	25268	21264	14587	44132
1533	5037	12393333	56	56_5037	8907	3	8634	2	3	2	3	2	3	2	3	2	3	2	3	2	3	2	3	10110	2	3	2	3	2	3	2	3	2	3	2	3	2	3	2	3	2	3	2
1534	5072	12451667	56	56_5072	6770	9416	7364	10689	11188	12217	3	2	3	4314	1891	3183	1081	3222	2	3	2	3414	2755	8290	3875	1978	2326	2626	2541	3547	3071	1843	9560	9467	1976	2623	2251	1781	2038	2585	2144	2273	3249
1535	5101	12500000	56	56_5101	3	8347	2	4559	8430	3	2	3	2	1452	1025	842	3	2	11301	3	2	490	1346	3	6309	2	452	981	1998	3575	3	2	3	2	480	1152	1074	3	641	1703	452	2164	575
1536	5142	12568334	56	56_5142	2	3	2	5111	8519	7675	15122	12544	9278	667	3	584	8610	477	11794	8028	12289	460	2	7771	815	3	2	391	295	518	169	3	8178	9712	392	2	3	2	3	418	159	2	3
1537	5187	12643333	56	56_5187	2	3	2	3	2	3	6915	2716	4792	626	2	3	2	380	1825	659	3	2	3	2058	486	2	3	2	567	3	556	591	2	3	469	2	3	2	3	2	3	357	517
1538	5195	12656667	56	56_5195	1200	2290	1102	749	1381	455	4752	5533	7062	632	2	3	3509	548	1083	3413	6277	1191	348	1223	345	2	178	320	417	782	342	490	1193	1003	419	612	282	277	3	519	447	212	717
1539	5255	12756667	56	56_5255	336	2	3	2	3	2	3	2	3	2	3	2	3	2	3	2	3	2	3	2	3	2	3	2	3	362	2	3	371	401	2	3	2	3	2	3	308	2	3
1540	5325	12873333	56	56_5325	2127	2006	1281	2	4203	2326	1619	309	717	3935	877	2480	453	3131	3286	3	671	1550	2313	1744	2351	1064	1745	1990	2012	2410	2315	2729	1748	1169	1838	2204	1265	2030	2579	2941	1990	1278	4561
1541	5290	12815000	56	56_5290	2423	2347	1366	5259	4795	2718	2406	1412	2601	3799	873	2558	2899	3056	2888	1664	1416	1754	2428	2188	2243	1204	1998	2145	1979	2484	2489	2657	1792	1198	1720	2397	1210	2156	2946	3194	2137	1145	4622
1542	5326	12875000	56	56_5326	2	3	2	4489	3	788	1676	1580	3352	2	3	2	3136	3	2	1298	1531	3	2	3	388	2	3	2	3	539	411	2	440	341	3	2	3	2	3	2	3	2	3
1543	5398	12995000	56	56_5398	2	3	2	529	253	116	3	2	129	443	3	2	3	2	3	2	3	2	3	2	264	3	146	2	3	306	253	421	2	3	2	3	2	279	3	311	2	3	2
1544	5466	13108334	56	56_5466	2450	2024	1987	2498	944	1489	1233	675	1269	1246	724	1540	3758	1824	667	727	2754	646	2365	1970	560	397	703	620	774	628	472	2570	1548	1052	662	493	1235	631	1822	774	652	508	2453
1545	5525	13206667	56	56_5525	12025	9425	10221	14936	12419	12689	14853	11645	13715	12443	11118	9999	12373	9035	13973	12167	14642	23066	9637	10590	10341	8854	9481	9504	14071	13229	9024	11269	12147	12442	12310	10612	11959	8651	8283	12299	10714	11339	10408
1546	5560	13265000	56	56_5560	1375	909	3	4839	3535	3510	1196	2	1397	1648	3	1090	1453	1190	1514	709	893	2	1061	3	1153	558	953	1034	1100	1204	1009	1211	2001	1220	827	1009	2	1043	1086	1321	975	780	1848
1547	5592	13318334	56	56_5592	425	3	2	886	605	561	245	3	473	595	2	418	697	381	544	3	2	3	380	2	361	246	458	478	495	341	3	487	461	2	3	339	2	447	418	714	3	389	713
1548	5637	13393333	56	56_5637	499	359	2	729	610	387	384	409	946	595	3	423	872	395	623	2	514	3	407	526	479	2	299	3	386	513	520	468	334	2	352	554	3	395	2	455	353	319	623
1549	5701	13500000	56	56_5701	195898	129581	105084	428567	367070	250714	139796	158986	278680	389919	80726	259888	324736	313663	287786	126444	161279	195104	287993	148690	221124	123070	172849	199066	212807	242975	251445	294897	168017	112542	183253	249701	113886	223051	305601	311466	227995	117111	471798
1550	5780	13631667	56	56_5780	6299	4468	3757	12342	8867	6798	4369	5074	8984	12396	3713	7929	9619	9809	7851	4904	5752	8669	10393	5152	6173	4730	6362	6363	6227	9485	6585	7908	5009	3644	5337	6924	3758	5597	6656	7424	5968	4414	11304
1551	5823	13703333	56	56_5823	1162	870	728	1495	3	1106	2	1377	2299	3	652	2	3	1630	1834	1140	1536	1346	2443	1212	1219	806	1016	2	1498	1861	1731	1543	1267	949	1484	1871	809	3	2	1000	1493	1251	2002
1552	5860	13765000	56	56_5860	3	2	3	2	3	2	201	410	1025	818	3	2	3	2	3	2	3	2	894	3	161	2	3	2	571	3	658	684	286	2	558	756	3	257	391	2	613	3	754
1553	5894	13821667	56	56_5894	2	3	2	3	2	3	228	349	612	347	2	3	2	3	2	3	2	3	2	3	2	3	2	3	2	313	637	3	2	3	378	548	290	2	3	256	455	2	3
1554	5993	13986667	56	56_5993	744	502	2	1010	711	796	594	3	1116	850	432	645	874	554	752	2	729	797	510	674	601	425	601	611	762	893	776	793	524	559	240	624	478	633	3	761	360	344	793
1555	6078	14128333	56	56_6078	884	391	499	1222	972	826	908	502	2238	1136	2	546	1271	996	1361	689	777	607	732	1134	701	441	700	475	1034	945	531	1298	677	671	800	831	3	522	507	1259	474	760	1130
1556	6080	14131667	56	56_6080	2	3	2	3	2	3	325	2	774	236	3	2	3	2	3	613	2	3	2	3	2	3	2	3	2	3	2	3	2	3	2	3	2	3	787	2	3	2	3
1557	6152	14251667	56	56_6152	23420	17181	18489	26432	14495	19206	16124	17288	31627	25480	10531	14844	32716	19227	28133	15260	20475	26285	21014	21089	21726	12304	15651	14575	23098	24928	15856	27142	16341	15969	16238	21196	12169	15130	16287	22989	18917	14571	29470
1558	6191	14316667	56	56_6191	62443	39222	33227	93340	38612	73632	52606	56665	109515	69695	22782	33058	113253	37975	32769	44329	64934	55809	59642	23931	20701	51768	40393	36420	19600	25321	14600	85075	33631	47525	12966	23956	7147	37673	36060	74328	12253	10065	32525
1559	6236	14391666	56	56_6236	5719	4304	4579	9527	5275	6315	6840	6020	11308	7224	4731	4358	9163	4338	6086	6106	7216	10093	4740	4574	4406	4296	4561	4293	5995	5729	3629	7292	5158	5507	4608	4403	4565	4056	4228	6349	4229	4208	4414
1560	6270	14448334	56	56_6270	2	423	3	2	152	744	526	3	2	3	2	3	2	3	2	308	3	2	3	2	342	3	321	2	3	2	334	3	2	467	198	3	2	3	2	3	2	139	329
1561	6337	14560000	56	56_6337	583	3	426	2	416	429	3	594	1823	2	3	2	1013	3	2	442	837	3	2	728	746	3	2	3	209	1005	476	2	280	354	229	463	314	3	2	3	164	138	2
1562	6391	14650000	56	56_6391	610	483	3	1830	821	512	975	1034	3236	1207	2	3	1572	890	1086	2	827	726	702	509	831	297	568	376	937	916	381	1194	469	390	415	509	3	514	615	1064	588	342	1183
1563	6425	14706667	56	56_6425	1075	672	494	3490	1467	1159	900	567	3076	2488	2	793	2289	1456	2252	772	1143	959	1262	1220	1222	321	682	699	1271	1594	648	2071	813	702	933	1010	400	756	1021	1833	795	528	1937
1564	6486	14808333	56	56_6486	3	2	3	2	3	2	283	276	406	3	2	3	2	3	156	2	3	2	3	2	3	2	3	2	3	2	3	2	3	2	3	2	3	2	3	2	3	2	3
1565	6570	14948334	56	56_6570	297	486	808	2	503	496	4216	3332	6291	441	830	465	3113	3	302	2330	2670	1765	2	3	292	596	521	569	357	279	544	361	760	930	730	379	898	382	410	196	790	645	429
1566	6633	15053333	56	56_6633	8380	4476	6593	9991	4780	11565	14906	14918	26967	9795	4006	3865	19403	4674	16529	13381	17439	8711	5369	7949	7343	3257	3431	4351	5531	12014	3698	9534	6626	5721	6392	8956	4823	3387	3513	2663	4875	5536	4471
1567	6706	15175000	56	56_6706	2	3	2	486	3	83	2	3	372	482	2	3	2	3	365	2	3	2	3	2	174	3	178	2	3	201	138	384	2	3	2	229	3	2	3	246	132	2	3
1568	6788	15311666	56	56_6788	2411	1494	1747	2639	1096	1816	2	3	2	2538	705	1096	5744	1793	2732	3	2	2606	1911	1744	2014	830	1426	1261	2143	2240	1208	2921	1338	1420	1320	2128	888	1098	1435	1395	1537	1109	2391
1569	6756	15258333	56	56_6756	3714	2271	3587	4287	1974	4453	5809	5667	8749	3837	2079	1901	3690	2254	6775	5388	7354	4884	2650	3771	3237	1998	1825	2190	2212	5105	2086	4087	2909	2703	3612	3924	2664	1798	1846	2137	2633	2853	2449
1570	6837	15393333	56	56_6837	596	3	2	4334	3	1105	2	3	4289	2280	2	3	2429	674	1151	2	1022	742	427	3	266	2	144	3	569	979	108	3073	288	2	328	367	3	232	2	1005	376	170	789
1571	6892	15485000	56	56_6892	260	3	2	3	2	3	383	437	1353	2	3	2	3	2	330	3	543	2	3	2	3	2	3	2	3	334	2	3	121	2	3	2	3	2	3	2	3	2	3
1572	6942	15568334	56	56_6942	412	2	487	3	2	188	261	226	569	3	2	3	2	3	317	2	3	2	3	2	3	2	3	2	3	313	192	2	108	3	237	2	3	2	3	2	268	172	3
1573	7005	15673333	56	56_7005	8023	4715	5372	12947	4848	7535	5662	5785	13952	9216	3129	4856	11774	5840	9541	4164	7829	9862	6967	7277	6630	3692	4268	3999	7800	9334	4783	13419	5492	4565	5324	6396	3644	4984	4786	9528	6503	4460	11018
1574	7104	15838333	56	56_7104	7245	3717	3413	10278	2239	3676	3033	1861	11810	7099	1623	2977	4415	2650	6892	1496	2027	4708	4676	2191	4027	2705	3942	1529	4665	3272	1692	8186	5015	1966	2459	5515	3348	3419	4195	5564	4268	2877	4890
1575	7163	15936666	56	56_7163	2	3	2	3	2	3	2	3	389	2	3	2	3	2	3	2	3	2	3	2	3	2	294	3	2	3	2	252	220	3	2	3	2	3	2	3	2	3	2
1576	7267	16110001	56	56_7267	1276	797	1154	1106	394	759	2648	1825	2601	1043	3	370	2790	458	2900	2165	2741	976	544	2177	1814	253	349	358	1028	2550	1599	1148	355	2	2056	2101	1688	340	437	866	2171	1656	1958
1577	7372	16285000	56	56_7372	2195	1016	1051	3591	988	1821	879	927	3555	2498	541	905	3095	1291	2347	442	1675	2779	1677	1608	1577	566	908	724	1873	2134	816	3240	1048	988	1008	1492	593	945	897	2311	1195	818	2051
1578	7373	16286667	56	56_7373	3	2	3	2	3	2	188	3	2	3	2	3	2	3	828	834	752	2	3	2	3	2	3	2	3	2	3	2	3	2	3	2	3	2	3	2	3	2	3
1579	7582	16635000	56	56_7582	608	308	2	814	3	473	169	287	904	635	2	3	964	2	652	3	445	957	463	2	495	265	215	235	417	475	220	898	296	3	340	467	2	226	3	470	311	144	587
1580	7774	16955000	56	56_7774	451	2	3	953	249	405	341	315	1020	589	2	3	822	2	543	3	503	884	307	2	299	3	169	2	360	424	145	997	252	3	273	235	2	177	3	671	310	189	542
1581	7830	17048334	56	56_7830	313	2	3	601	2	3	192	2	580	444	3	2	447	3	271	2	3	423	2	3	2	3	2	3	217	2	3	837	2	3	142	2	3	2	3	372	2	120	3
1582	7937	17226667	56	56_7937	1358	589	460	2537	499	1103	450	468	2570	1749	2	467	1811	527	1206	3	808	1830	935	752	716	263	504	349	1041	1125	296	2567	488	478	416	817	2	367	3	1520	494	270	1056
1583	7976	17291666	56	56_7976	3630	2637	3876	4255	2231	3483	15875	14504	21675	1273	651	2	15631	3	9426	14290	16928	2	3	4218	2	3	2	3	2	272	3	2	2742	3	2	3	2	3	2	121	135	3	2
1584	8146	17575001	56	56_8146	3	2	3	2	3	190	2	3	374	268	2	3	2	3	2	3	2	3	2	3	2	3	2	3	2	3	2	3	2	3	2	3	2	3	2	3	2	3	2
1585	8201	17666666	56	56_8201	3	2	3	2	3	112	2	3	2	3	2	3	2	3	267	2	3	2	3	2	3	2	3	2	3	2	3	2	3	2	180	3	2	3	2	3	2	3	2
1586	29	4046667	57	57_ 29	86490	90268	65220	12727	60165	82687	77986	78348	3	80631	92611	82230	63201	83415	80235	56415	82224	85682	2	90083	78306	81954	69314	85574	85902	85912	74385	67336	91165	89217	94982	80641	85500	67877	69565	80511	90068	81408	20316
1587	84	4138333	57	57_ 84	3	2	3	2	3	2	5735	4523	11358	3	2	3	433	2	3	2	865	3	2	3	2	3	2	3	2	3	2	3	2	3	2	3	2	3	2	3	2	3	2
1588	137	4226666	57	57_ 137	102072	108371	143570	3	43065	46079	80948	62164	56282	56166	106193	80054	64722	104252	79230	92061	101630	121230	131664	77646	128580	170005	143778	164489	95292	225322	324614	169150	113509	150603	248964	305634	367903	155963	178594	206760	289667	308177	303107
1589	197	4326667	57	57_ 197	1717	2359	2988	2	764	729	2299	2956	4343	575	1384	540	3439	1165	4539	2705	3139	970	1263	3174	4039	1614	1009	1348	1243	3876	3116	610	1793	5637	2215	2947	2766	746	484	1390	2808	1889	3
1590	271	4450000	57	57_ 271	7624	2	12286	3	14717	11579	9170	12545	13871	10916	14063	10209	10474	6585	11081	12393	18420	11746	10594	10721	13402	11640	10480	10672	8055	11417	11874	11434	13809	14286	12315	11037	13612	9828	9831	11420	2	10421	3
1591	311	4516667	57	57_ 311	12181	6637	18604	2	21754	23370	27161	19763	13190	12185	27055	22498	8777	17894	18639	31100	29662	15234	17453	19324	18818	20088	21119	17789	24014	19614	16528	5730	24649	24113	26335	24779	30720	18209	18716	14620	13072	28989	3
1592	319	4530000	57	57_ 319	2	12183	3	2	3	2	3	2	3	2	3	2	3	2	3	2	3	2	3	2	3	2	3	2	1054	861	3	478	2	3	2	3	2	3	2	3	25076	1232	2
1593	364	4605000	57	57_ 364	882	512	585	3	1454	1735	2	837	879	3	2	3	400	2	3	790	2	3	2	1914	784	3	2	3	2	3	2	3	355	2	3	2	3	2	3	2	3	2	3
1594	414	4688334	57	57_ 414	2446	2736	3560	2	6510	2991	2618	5323	4193	3915	3401	4563	5447	3574	4518	2933	4066	2942	4082	2976	3783	3370	2971	4404	4242	5092	3965	2299	3169	2594	2895	2714	2801	3589	2677	3769	4944	3313	3
1595	472	4785000	57	57_ 472	506	1908	1926	2	2656	621	3	2	2438	3	2145	2834	3002	2213	991	2	2133	1920	3287	3	2022	2674	2	3	2930	2	1053	3	1728	1977	2	1791	1528	1855	943	1403	2897	2199	3
1596	518	4861667	57	57_ 518	474	2	945	3	645	2	3	2	3	2	3	2	3	320	2	3	554	405	2	3	2	760	3	2	3	428	306	2	3	2	3	2	495	405	328	3	511	544	2
1597	555	4923333	57	57_ 555	4986	4801	6426	3	6726	5003	1678	1263	2018	1617	3788	2969	1451	2	2728	1310	1214	1793	2017	3015	3999	1869	1198	1800	3	3020	2457	2	5929	39394	1879	2142	1300	1391	1410	1286	2878	1926	3
1598	605	5006667	57	57_ 605	1964	2185	2642	2	1617	570	3	1925	2160	2879	1137	1146	2	838	2163	2139	2151	765	523	1738	1925	790	3	522	1198	2057	1512	966	723	5804	1792	1262	1500	2	3	448	2228	1823	2
1599	717	5193333	57	57_ 717	73770	53675	56460	40244	77640	62184	100376	91091	104544	44403	41345	15863	49183	29416	44685	50650	62907	35355	39828	65305	35465	15765	22516	34640	15570	33423	35320	19454	100905	45327	47938	37238	40228	19768	28905	15883	32921	46668	3
1600	685	5140000	57	57_ 685	16055	14949	18571	2	15285	4857	16550	21509	6271	4492	16624	17417	22809	4986	14890	17010	17402	4704	15595	13704	14266	20915	13666	13854	27218	14584	14464	10445	16872	14384	5819	13660	16490	13300	12899	20005	6287	14631	3
1601	756	5258333	57	57_ 756	4624	3049	2	3	5422	2	3268	3238	6027	3	3585	3141	7199	2	3	4561	4231	2	2890	5942	4052	3846	4485	3680	4661	3	4169	3952	5053	2	3	4123	4992	4458	3923	4363	2	4136	3
1602	808	5345000	57	57_ 808	4375	2	4385	3	4606	5073	4351	5689	2	1158	2032	2022	5333	1653	3013	2915	2898	2519	2201	2248	3208	2613	1851	2126	1870	3133	2561	728	3746	3940	2824	2390	2950	1624	1889	1549	3794	3508	3
1603	846	5408333	57	57_ 846	2125	2	1392	3	2	2191	3	1554	2	3	937	2	4446	3	934	995	2	3	853	2	979	3	2	3	2	1127	1045	1685	1070	1096	3	1030	2	3	2	3	2	1140	3
1604	882	5468333	57	57_ 882	26576	33637	28563	2	3518	1444	95856	76100	47892	2050	3001	3513	40285	2531	9677	51507	33991	2707	7397	4826	6220	4172	2849	4093	2574	10935	4603	1696	34907	35256	3163	3583	5467	3124	2826	3114	4740	9678	3
1605	947	5576667	57	57_ 947	2	3	2	3	2	3	2	3872	2291	3	3447	3526	2	3	2	3	2	9354	3	2	3	2	3	2	3	2	3	5772	2	3	2	3	2	3	2	3	2	3	2
1606	980	5631667	57	57_ 980	28962	19825	26578	3	7742	14400	73431	77311	127185	13035	6856	8002	57851	12536	15218	51742	49489	14202	10563	21332	10787	7220	11725	7479	10339	10787	7980	11514	47318	32226	17352	15522	14931	6241	12027	8946	17553	20252	2
1607	988	5645000	57	57_ 988	3	2	3	2	13363	1287	3	3201	2271	7956	11800	8500	4098	9170	27446	2	2289	1954	14766	1941	18920	9110	7512	10733	16793	19409	15179	1668	3	10502	1427	7371	6863	10067	6796	11308	2369	8405	2
1608	1026	5708333	57	57_1026	3	2	3	2	3	2	3	2	3	1509	2	3	2	1567	3	2	3	2	3	2	2245	3	1811	2	2239	3	2108	2	3	2	3	2	3	2	3	1938	2	3	2
1609	1061	5766667	57	57_1061	9638	6166	8330	3	9222	12942	9451	8772	10407	10426	8878	8510	9764	9313	8396	8408	9615	10895	8815	8050	7376	8010	10038	9529	11163	8648	7398	12330	10738	10140	11095	8854	8146	10750	10711	11101	9691	8296	2
1610	1109	5846667	57	57_1109	1840	2581	2565	3	3317	1523	1499	2371	1069	1737	2672	2949	1713	2591	1748	2346	2617	1303	3037	2530	1867	3738	2715	3536	1255	1493	2640	888	3029	3223	1990	1416	2283	2819	2580	2108	2220	2502	2
1611	1172	5951667	57	57_1172	2278	1058	2320	3	1362	3595	1861	3494	4629	2134	800	695	3851	2411	1969	2138	3526	3868	513	3852	3199	1424	1740	1270	445	2092	2959	2192	1191	1496	4573	2623	2320	1488	1773	1558	6168	3161	2
1612	1219	6030000	57	57_1219	6983	5696	7637	3	4900	5325	8465	9052	10490	5079	4886	4414	9305	5853	13605	10014	12147	7285	9061	10401	16664	7440	5756	7292	16604	11784	9188	6072	5215	4024	8379	11899	10377	5752	5003	7279	7064	12178	2
1613	1250	6081666	57	57_1250	2097	2084	3882	3	1926	1543	1157	2162	1660	902	2583	1730	1619	1573	3361	3687	3400	1882	1776	3090	4013	2639	1654	2259	1999	4044	4169	916	3343	3334	2369	3990	5068	1162	1450	2	1820	4252	3
1614	1296	6158333	57	57_1296	6454	7025	7076	2	3810	2038	29062	26642	16453	2387	1054	3	4436	4210	4962	6278	4958	2023	2694	3183	4134	1001	3097	1134	4168	5598	2185	3139	11055	9042	5161	2099	2575	3305	4338	2839	4008	4647	2
1615	1364	6271667	57	57_1364	1847	3	2	3	935	946	2	3	3442	902	2	3	2	1970	3	2	3	2	3	2	3	2	3	2	1789	3	2	3	1131	2	2058	3	2	459	1153	3	2	3	2
1616	1333	6220000	57	57_1333	4585	4233	5184	3	2	3	2539	3285	2640	970	3209	3920	3115	2	3	4334	4033	3460	3043	4262	5252	4870	2	4443	3	5485	3514	2	4457	6082	3	3455	4659	2	3	2	3	4719	2
1617	1387	6310000	57	57_1387	3	2	3	2	3	2	3	2	3	2	3	2	3	2	3	2	3	1002	2	3	2	3	2	3	1085	2	3	2	3	2	3	2	1238	3	2	750	3	2	3
1618	1427	6376667	57	57_1427	20384	24602	22184	2	31113	19387	66258	59761	36420	23184	17884	15429	19002	1511	9824	24563	17050	2017	4078	4372	7754	1863	878	2597	3586	11656	1517	503	51248	42757	3235	4777	5095	1258	1594	1146	2222	3	2
1619	1485	6473333	57	57_1485	214	3	2	3	1834	749	2	3	2	686	1529	982	3	553	361	387	2	676	328	3	2	361	863	3	809	272	2	3	2	630	3	2	3	2	381	3	352	2	3
1620	1494	6488333	57	57_1494	2	3	2	3	617	1113	2	3	2	3	2	3	2	3	2	3	2	3	2	3	2	3	334	2	3	2	3	2	3	2	3	2	3	2	3	2	3	2	3
1621	1534	6555000	57	57_1534	13948	13896	14091	2	21466	15650	16094	15587	19014	16885	17620	18649	20139	14482	22059	15361	15323	13801	18303	17950	15634	13379	13896	14622	21319	17713	14289	11270	16867	19029	15907	17249	14551	14170	12840	17204	16197	18101	3
1622	1572	6618333	57	57_1572	2	3	2	3	2688	3720	1426	2852	3635	3166	2446	2	3	3068	2750	2180	2491	3715	1644	2594	2044	2	2132	1690	2133	2340	2284	2393	3	2	3005	2244	1731	2015	1875	3	2	1909	3
1623	1637	6726666	57	57_1637	9552	8093	9901	2	6273	5489	3	2	3	5279	6269	5668	2	5684	10437	3	2	6425	6886	8776	10260	6365	4905	6030	6970	11630	6593	3	10638	9682	8029	10165	6323	5174	4914	7408	9093	8624	2
1624	1671	6783333	57	57_1671	34713	27936	36230	3	3625	3593	110970	114338	159517	4432	6230	3460	69777	6696	14269	72426	62108	6712	10792	10342	11506	4455	4127	6142	9058	17447	8410	4951	53567	43202	10057	8780	9706	2618	5570	7077	16095	19783	2
1625	1739	6896667	57	57_1739	1471	2697	5644	3	2811	2597	2152	1528	665	816	4203	2846	1837	2250	3937	5383	5270	2871	2802	2	3997	4023	2681	1859	3384	3866	7294	4201	4209	4257	11475	7205	10065	2247	3315	2752	8094	8991	3
1626	1742	6901667	57	57_1742	2	3	2	3	2	351	3	2	893	3	2	3	2	3	2	3	2	3	820	2891	809	1559	2	3156	3	3709	4890	2	3	2	6918	4919	7151	2962	2725	3	2	5731	3
1627	1779	6963333	57	57_1779	8484	8728	9028	2	3	2	3	887	704	1602	4377	3298	2347	5933	2282	2189	2	6340	9239	2344	7007	10331	8304	11193	8093	19214	23438	13695	7658	10025	19778	26384	33596	10836	13496	22028	25818	26466	3
1628	1853	7086667	57	57_1853	2945	3376	3653	2	4658	3538	2394	3465	2677	3274	3063	4048	3806	4036	4139	3613	3742	3710	4103	4350	3350	3653	3942	4106	4820	4576	4318	2292	3982	3	4475	4521	4584	3688	3625	4736	5099	4214	2
1629	1907	7176667	57	57_1907	13867	18656	16547	3	9303	6365	42951	46846	23978	8685	8305	9953	13585	8953	16766	12028	11608	8329	15612	10254	10506	7379	7175	8903	5325	14228	8264	5260	56790	10206	8203	9992	8007	6359	6627	9009	8064	9844	2
1630	1965	7273334	57	57_1965	3	2	3	2	3	2132	2	3	2	3	2	3	2	3	2	3	2	3	2	3	2	3	2	3	2	3	3487	2	3	2	3	3486	2679	2	3	2	3	2	3
1631	1993	7320000	57	57_1993	37138	27904	32734	2	13894	10846	146763	151821	214753	13976	12813	15570	51871	15958	27909	54596	47607	16781	21404	21782	30257	13029	11539	13358	18034	31603	18049	11858	61510	38843	17510	17693	17945	9982	12283	16099	16473	27959	3
1632	2055	7423333	57	57_2055	2	3	2	3	2	3	2	3	2	3	2	3	2	3	2	3	2	3	3292	2	3	2	3	2	3192	3	2	3	2	3	2	3	2	3	2	3	2429	2	3
1633	2056	7425000	57	57_2056	2738	2376	2342	2	3176	1882	3	2	3	2198	2636	2738	4701	2370	2567	3524	3527	1988	3184	2812	2140	2315	2249	2381	3043	3218	2144	1735	2959	2550	2238	2206	2042	2041	2205	2877	8104	2304	2
1634	2124	7538333	57	57_2124	115801	151063	141601	63146	86656	96159	366228	345076	413704	97234	69550	58770	288234	19793	63649	319209	320676	19737	39641	27293	33386	11878	12213	21813	21817	48922	19889	9589	160554	68645	22484	22357	20240	8648	14829	15594	20771	38357	3
1635	2149	7580000	57	57_2149	2	3	2	3	2	3	2	3	2	3	2	3	2	11117	3	2	3	8560	2	10901	3	2	13947	3	2	3	12603	7286	2	3	31859	12819	20624	7920	14156	2	27525	3	2
1636	2182	7635000	57	57_2182	31529	29905	33628	3	2	3	54491	53417	77481	23401	2	3	50136	20994	31343	51466	47721	19950	26795	24558	27432	25296	23048	27100	25482	27204	25133	20403	2	3	22106	24426	26401	22060	22670	27134	22511	24361	2
1637	2276	7791667	57	57_2276	22667	22756	24131	3	13725	12875	24936	22389	27063	12202	12061	13002	29040	11692	39168	36395	32486	11032	14286	34162	40436	11545	10867	11563	15360	48162	32197	10115	12315	12584	34005	42498	38108	10187	11699	12732	34357	38876	2
1638	2329	7880000	57	57_2329	5124	3	2	3	5306	2	3	2	3	3363	2	3462	3	4171	2	7467	6684	3	3637	6954	2	3	3854	2	3	2	3	1995	2	3	2	4968	3	3741	2	2712	4809	5349	3
1639	2371	7950000	57	57_2371	2	6281	5858	3	2	5885	10946	9236	11766	3	8594	2	6362	3	8691	2	3	6996	2	3	7339	3841	2	4054	9165	8673	6189	5377	6065	7242	6515	3	7996	2	5247	3	2	3	2
1640	2407	8010000	57	57_2407	3	1374	1012	2	3	2109	2	3	2	3	2	3	2	3	1396	2	3	1058	2	3	1382	2	3	2	1931	1554	877	3	2	3	1255	2	1247	3	1444	2	3	2	3
1641	2452	8085000	57	57_2452	5785	5475	4858	2	3	6902	527	5716	5776	5553	2	3	5687	4892	6861	5919	5318	4121	2	5111	3	2	4890	3	6245	2	5101	4386	1515	6838	4882	3	4983	4996	4909	2	4847	3	2
1642	2493	8153334	57	57_2493	4072	3966	4310	3	6801	2389	16417	16071	15064	2163	6360	5256	4270	1877	3513	7065	4118	1124	5993	1447	5937	5277	1487	5252	2625	6109	1851	1715	12501	4514	1774	5315	1612	1640	1652	6684	1526	5719	2
1643	2505	8173333	57	57_2505	3	2	3	2	1725	3	2	3	2	3	2017	1390	2	3	2	3	2	3	2912	2	2230	1858	3	1718	2	2647	3	2	3	2	3	1892	2	3	2	2484	3	2185	2
1644	2554	8255000	57	57_2554	3	2	3	2	3	819	2	3	2	3	2	3	2	3	2	3	2	3	345	2	578	321	3	2	3	675	829	412	2	3	978	583	2	3	2	3	2	3	2
1645	2601	8333333	57	57_2601	3	2	3	2	2869	4322	3	2	3	5259	3128	2683	2	6180	14555	3	2	3	3585	13509	13019	3225	3328	3252	3887	14311	10315	3095	2	2469	11024	11913	9972	2134	3687	3	10397	9647	2
1646	2639	8396667	57	57_2639	583025	349382	410453	48952	46472	37083	1900197	1926781	3014847	57397	45802	44595	1687238	63658	147698	1495657	1319710	68891	86287	82825	68897	35310	37450	39389	47833	98170	42857	31921	518445	61520	50560	49165	38972	34335	34435	47449	42598	74464	3
1647	2716	8525000	57	57_2716	4943	3879	3879	2	5173	4491	6173	6526	3	5070	4680	4531	8286	4339	6053	6704	6048	3129	3818	5219	4192	4138	4603	4328	5070	5201	3854	4097	4731	5148	5291	4872	4134	3718	3928	5675	4584	4816	2
1648	2762	8601666	57	57_2762	7639	6125	5842	3	5871	5207	11031	10560	14077	6632	5359	5389	12896	4603	14557	10841	10680	3237	6269	10619	12014	4468	4292	4595	6174	14628	7910	4482	5817	6137	8448	11333	8714	3520	4174	5424	8129	9287	2
1649	2827	8710000	57	57_2827	2183	1917	2150	3	2502	1807	1800	2019	2677	2300	1680	1649	4242	2023	4184	3304	3279	1739	2676	3133	3115	1961	1956	2006	2077	2455	2529	1550	2095	2090	2564	2661	1990	1948	1763	3143	2233	2199	2
1650	2857	8760000	57	57_2857	2019	2012	3	2	3	2	3	2176	2766	1000	2018	1893	2	471	3	2	3	437	2	3205	3	1739	383	586	2	3	529	2	2530	3	820	2	2464	438	3	674	828	3187	2
1651	2937	8893333	57	57_2937	3	2	3	2	3	8537	2	3	2	3	2	3	2	3	2	3	2	3	2	3	2	3	2	3	2	3	2	3	2	3	2	3	2	3	2	6189	15688	3	2
1652	2938	8895000	57	57_2938	13179	11096	11840	3	10627	8051	13921	13104	17038	10553	8499	9119	20507	8899	25985	17520	16678	6980	10017	20232	23902	7673	8313	8383	10272	28466	18274	9231	9975	10586	16131	22475	19049	7866	8254	12285	8009	19185	2
1653	3011	9016666	57	57_3011	3209	3145	3245	3	4379	4212	4728	4527	5815	4898	3000	3612	7198	3504	5395	4645	4637	2616	4393	6027	4008	2955	2915	3547	4664	3984	3457	3129	3924	3583	3616	3522	2969	3334	3237	5159	2900	4479	2
1654	3045	9073334	57	57_3045	1858	1739	2108	3	2837	2176	2013	1846	2738	3986	2034	2303	3650	2179	3191	1848	2334	1056	2897	2955	2213	2164	1691	2	2626	2639	1990	3	1789	2355	1520	1953	1302	1999	2	3	1174	2730	2
1655	3080	9131667	57	57_3080	3	2	3	2	3	2	3	2	3	2	763	3	2	3	2	3	2	721	3	2	3	908	2	3	2	3	2	3	2	3	2	526	3	2	3	2	3	2	3
1656	3111	9183333	57	57_3111	5356	5136	6173	2	7509	6454	7278	6064	8373	7956	5637	6280	10511	6805	9324	6343	6644	4725	7510	8622	5874	5412	5505	6009	7227	7117	5956	6053	7572	7437	6944	5904	5573	5737	5809	8661	5862	7533	3
1657	3156	9258333	57	57_3156	19394	18656	18502	2	24048	19254	22404	20079	23384	23793	18776	21466	30538	20601	30029	21842	20127	17457	23997	26594	20910	18331	19850	19344	23603	23999	19789	18938	23136	23436	22525	20863	18993	18348	18379	26821	18598	22843	3
1658	3204	9338333	57	57_3204	3279	3110	4224	2	4965	4260	4001	4070	5312	5296	2956	4314	6658	4152	5899	3758	4367	2823	5257	5667	4304	3847	3449	4411	4934	5127	4663	4041	5252	4728	3694	3907	4112	3921	3998	5734	3494	5000	3
1659	3234	9388333	57	57_3234	2009	2119	2	3	2866	2764	2	3	2	3868	1395	2437	5390	2866	3	2	3	2	3324	3	2	2213	3	2572	2	3	2	2416	4014	3	2	3	2	3	2262	3145	2167	2	3
1660	3270	9448334	57	57_3270	4353	4362	5489	2	4938	3871	3521	5229	7750	4783	2795	4702	5950	5004	3	2205	2	3718	6539	6666	3	3733	4583	5174	3182	2	6399	4620	4242	3234	1874	5432	5444	4189	5804	3772	3979	3	2
1661	3319	9530000	57	57_3319	8025	4774	3	2	3	4442	44159	47295	83168	7074	2	3	18669	2	7936	11335	12201	3963	3	7178	6955	3387	3403	2	3	12004	4711	2	3	2	4571	4043	3	3783	4824	2	3771	7825	3
1662	3373	9620000	57	57_3373	11345	11820	12094	2	14294	15520	19533	17031	25097	19994	12391	14037	25606	10518	23671	16553	17843	8754	15130	18856	18273	10041	9746	10528	15027	17664	10841	10140	13504	12320	10710	12788	10347	9899	10480	15388	9301	14307	3
1663	3437	9726666	57	57_3437	29153	33764	40681	2	45105	33850	39231	41467	37662	29260	39195	41868	41390	32966	49265	43035	49008	22541	43046	53936	42035	40126	32225	37246	42084	49635	47605	37799	47310	37332	44696	39257	44442	35560	29718	48699	43454	47313	3
1664	3472	9785000	57	57_3472	1996	3906	4538	2	4680	4115	4724	4142	5006	4554	3746	4081	6239	3879	6079	3715	4565	2040	4910	5716	4943	3800	2561	3744	5068	5002	4464	3736	4809	4134	3277	3602	4243	3789	3646	5473	3175	5078	3
1665	3507	9843333	57	57_3507	2726	3720	3840	2	3487	2736	2737	2709	3290	3970	2733	3065	4484	3353	4038	1802	3008	1684	3834	4305	4104	3077	2080	3371	3259	4504	4003	3520	3267	2480	2464	3330	4018	3028	3422	4604	2755	4288	3
1666	3581	9966666	57	57_3581	2	3	2	3	2	3	2	3	2	3	2	798	3	850	2	3	2	3	2324	2	3	1880	2	1911	765	3	1284	2	3	2	3	2	3	2	818	2160	3	2	3
1667	3582	9968333	57	57_3582	1524	1639	1423	2	2064	1097	453	495	359	2117	1213	1719	1305	1728	1125	1067	1024	1128	1352	1634	2044	959	1927	1015	1788	5766	3520	1469	1279	1293	3481	1174	3251	1861	2029	1365	4167	3917	3
1668	3648	10078333	57	57_3648	23553	23432	20327	2	24090	18825	16925	13083	15270	25545	17783	17374	32227	14078	21981	19492	14864	14146	24443	24665	17608	16717	18610	16038	21566	21231	15640	20595	21961	18622	20641	26779	19574	15449	15253	23012	13926	17196	3
1669	3689	10146667	57	57_3689	4124	2	3567	3	2	3514	3	1346	3140	2	3	2	3	2	3	2	3	2	3	2	3	2	3	2	3	2	3	2	3	2	4933	3	2	3	2	3761	4270	3	2
1670	3719	10196667	57	57_3719	2751	4128	2616	3	4658	1860	3491	2731	2028	5060	3729	4281	5096	4196	5730	3664	3218	3750	4994	5085	5385	3806	4343	4290	4805	8182	7341	4337	4382	4842	3404	5495	5228	3980	4923	7547	2713	5854	2
1671	3772	10285000	57	57_3772	3	2	3	2	3	612	2	3	2016	2	3	2	3	2	3	2308	3161	2	3	3094	4176	2	893	3	2	3	947	2	3	2	3	2	3	878	872	1384	2	3	2
1672	3811	10350000	57	57_3811	3	5109	4376	2	5937	4840	386	3	7231	2	3	2	3939	4891	4639	4751	4996	5278	3	7739	7809	4952	2	5024	6033	3	6721	5834	2	3	7065	8543	6357	5096	5110	5783	6197	2	3
1673	3822	10368333	57	57_3822	5501	5637	5143	2	6802	4282	5099	4584	32421	8262	4908	5317	6988	5053	9751	4995	4492	5030	7106	6829	5348	4987	5580	5085	6312	9550	5399	6293	5489	5463	7105	7461	5185	4913	5300	6455	3698	6988	3
1674	3874	10455000	57	57_3874	2	3	2	3	2	3	2	3	2	7173	4661	4833	3	2	7490	3	2	3	6120	2	3	2	5082	3	2	4706	3	2	3	2	3	2	3	2	3	2	3	4435	2
1675	3936	10558333	57	57_3936	4727	4019	3	2	3	2186	4062	3416	5883	5676	2	3	5264	3837	5614	4036	3994	2	4473	5666	4154	3	3857	3812	4444	4778	4249	5082	2	3	5174	5672	3696	3739	4286	3697	2092	4343	2
1676	4021	10700000	57	57_4021	3	2	3	2	3	2	5364	4740	7222	3	4624	2	7596	3	8583	5111	5599	2	3	2	6055	3	2	3	5898	2	6158	3	5712	5755	6696	2	4375	3	5371	4889	2	5781	3
1677	4051	10750000	57	57_4051	6374	5655	5100	2	6444	4059	5349	4521	6935	6894	4905	5173	7489	5856	9122	4950	5403	5214	6443	7794	6037	4839	5548	5550	6843	6850	5651	6116	5857	6416	7394	7176	4499	5052	5686	5514	3500	6004	3
1678	4102	10835000	57	57_4102	22301	19556	19965	18559	39988	19247	15712	15858	20856	34020	16142	31037	26036	34209	33136	17397	16360	17377	29351	24130	28838	19536	25507	27180	23815	27631	29588	25080	22648	19574	27368	26514	19296	26494	29286	29234	21704	17182	27073
1679	4163	10936666	57	57_4163	17594	16120	14801	2	16827	13431	14888	13796	17584	18697	13420	14464	21411	15060	25737	16099	14312	13733	19156	21474	16179	13113	15375	14484	18758	18058	14917	17023	16322	17540	18496	19225	12783	13869	14912	20003	11934	16219	3
1680	4222	11035000	57	57_4222	6751	6397	5878	2	6756	3870	4640	4289	6380	6681	5280	5216	6371	3447	10115	4713	5455	5467	7003	8301	7457	5480	6167	5832	6584	2696	3439	6503	5935	6569	4435	4679	1796	5400	6293	6139	1469	6738	3
1681	4262	11101666	57	57_4262	3764	3575	3039	2	4106	1526	2265	2543	3582	3933	2961	2836	2796	3	4936	2090	2703	3089	4101	4348	2572	2945	3518	3414	4248	2	3	4083	3474	4156	2	3	2	3249	3626	3042	3	2585	2
1682	4311	11183333	57	57_4311	3	2	3	2	3	2	3	2	4951	4940	3	2	3	3893	2	3	2	3700	3	2	3	2	3	2	3	2	3	2	3	2	3	6563	2	3	2	3	2	3254	3
1683	4352	11251667	57	57_4352	9265	8496	7402	2	9096	7654	7480	7218	9495	3	7637	2	10956	8022	3	7617	7484	7633	2	11259	3	7255	4087	2	10597	3	8102	6670	8539	9074	9441	2	6336	3	2	3	3341	2	3
1684	4381	11300000	57	57_4381	2	3	3438	2	3	3343	2	3062	3	2	3318	3545	3	2	4690	2621	3437	3	4063	2	2724	3064	3	3919	2	2904	4717	4896	3	2	5490	4533	1874	3806	4439	3250	2978	3	2
1685	4412	11351666	57	57_4412	3	2	2767	3	2	3	2	2614	3	2	3	2	3	2	3	1608	2	3	2	3	2	3	2	3	2	3	2	3	2	3	4246	2	3	2	3	2	3	2	3
1686	4454	11421667	57	57_4454	7445	6888	6333	2	6698	4744	4898	5480	7806	5620	4076	4947	7554	6266	14089	5584	7246	4699	6057	11424	12846	4666	5654	5702	6702	15537	12197	5833	3	5363	12705	15831	10195	5080	6658	5137	12503	10584	2
1687	4538	11561666	57	57_4538	20889	3772	14357	3	14982	10491	10255	8446	16390	16376	7930	8360	16726	9494	5456	6976	7264	12528	11245	4235	4811	10272	9147	10921	9675	5463	11861	26948	13384	12535	16688	19237	12626	8476	11775	11395	9903	3454	2
1688	4572	11618333	57	57_4572	4203	3	3209	2	5949	4200	2190	2937	3	2	2592	4122	5836	5316	3	1341	2	3772	3	2	3	3261	4228	4005	4208	2	4489	5555	3940	3	5781	5716	3050	3811	4670	2	3881	3	2
1689	4632	11718333	57	57_4632	3	613	2	3	1406	1003	2	423	695	1420	3	1030	1021	1174	785	2	3	2	3	2	1300	3	2	3	1094	1816	1424	2	3	922	2	3	2	952	3	2	3	2	3
1690	4675	11790000	57	57_4675	1250	832	1034	2	3	2	1972	2610	3547	3	686	2	1982	3	2913	2	1168	1359	1472	2742	3	819	1193	948	2	3948	2295	3	848	2	2094	3284	1902	3	1531	2	2199	2530	3
1691	4750	11915000	57	57_4750	6383	5679	5270	2	5494	5789	5815	4997	8100	7094	5035	5744	8399	5327	10007	3536	6090	5988	6512	8695	7447	4708	5358	5017	7389	8896	6037	6434	6402	7248	8329	8260	6155	4957	5061	7596	6645	7670	3
1692	4806	12008333	57	57_4806	2	3	2	3	2269	2324	437	1319	1847	3064	1781	2055	3089	2013	2	3	1486	1879	2747	2	3	1878	2124	1788	3048	2	3	2	3	3096	2	3	2	1783	1979	2646	3	2	3
1693	4805	12006667	57	57_4805	2428	2257	1634	2	4076	3451	477	1255	2031	5138	2055	3762	3263	3818	3380	3	1576	2796	3956	3196	2464	2745	2666	2566	2770	2946	1974	3715	2786	2297	3074	3045	1867	2911	3581	2190	1915	3205	2
1694	4889	12146667	57	57_4889	12034	9098	9262	3	7819	10161	15253	6520	9065	12428	5865	6743	13339	7662	19908	6771	9315	7374	10321	15373	10296	6292	6099	4955	9199	12128	6959	10403	8746	9178	10139	11278	7287	6323	13758	9939	8057	10893	4951
1695	4920	12198334	57	57_4920	2	3	2	3	15347	15237	7419	2	3499	17366	3	5777	2	6634	3	9084	11716	2	14764	3	2	3	2	3	2	3	2	3	2	3	2	3	2	3	6693	16363	2	3	2
1696	4951	12250000	57	57_4951	17225	14441	15186	7610	14852	12816	8932	2640	9196	10045	7864	12729	18689	14878	18189	7141	9385	10532	7967	13096	13765	9127	10749	9882	13455	14967	13207	14944	10266	10954	14180	15826	9684	11486	6486	8388	12760	11550	3
1697	4992	12318334	57	57_4992	73048	64330	49402	121138	138968	86225	47144	50936	52562	123690	47727	108860	80670	124426	110486	48415	54404	89681	101045	71211	100630	65206	86873	88457	81270	104001	101634	84314	69205	60471	78489	91811	62174	92278	105967	103290	88800	61716	165528
1698	5037	12393333	57	57_5037	34794	31343	32737	38669	40341	46495	2	3	2	18845	11037	13272	3	15943	2	3	2	13705	15894	31234	15720	10659	11912	10036	16145	16878	12567	15355	33536	36925	14620	15875	10642	10845	11628	18107	11664	13592	3
1699	5101	12500000	57	57_5101	2	3	2	3	20936	21150	2	3	2	6688	4887	4282	3	3822	27882	2	3	3580	6395	26466	17155	2567	3145	2304	7433	10836	3097	2	16945	3	4603	5881	4500	2	3762	7303	3538	7963	3
1700	5160	12598333	57	57_5160	22943	21250	21544	14911	27073	28576	37893	36025	17828	2	3	2843	36565	2	37881	32464	37596	3	2	17601	3767	3	2	3	1962	3339	2	4689	23671	34163	1844	1890	3	2792	2	2800	1530	1450	3
1701	5152	12585000	57	57_5152	2	3	2	21248	3	2	16351	3	2	5902	3162	3591	3	3469	7795	17452	19877	3135	4648	6613	4731	2	2609	3	4897	6086	4886	5121	2	7859	3	4551	3200	2758	2648	2	3	3921	2
1702	5195	12656667	57	57_5195	9818	7749	7505	5812	3	10757	14387	16524	15858	7694	4646	5022	22369	5034	10026	15208	12721	7027	6929	6955	6419	2821	4568	2849	7138	7356	4553	7073	3646	8789	4430	6352	4171	4507	4542	5140	4497	5661	2
1703	5240	12731667	57	57_5240	9454	7864	5766	3	16376	11351	10220	9557	7658	13567	2	9084	21879	10460	9350	12522	3	6288	8887	5753	8607	4596	6289	7035	7008	8360	8082	9462	6002	6224	5814	7043	4230	7257	8686	9403	6873	3749	2
1704	5291	12816667	57	57_5291	9050	6270	1431	3	6247	3451	8164	7895	7909	4337	1938	2374	20309	1689	2662	8476	10892	2204	2589	3494	2385	1494	1861	1841	2284	2643	1918	6425	3519	3603	1052	2861	1549	1642	1841	2555	1755	2	3
1705	5349	12913333	57	57_5349	3273	1888	2	3	2	3	3636	2628	1993	2	3	923	11202	2	3	3228	5299	2	3	1236	2	3	2	3	2	3	2	3	2	1922	3	2	3	2	3	2	3	792	2
1706	5379	12963333	57	57_5379	1376	502	778	3	2676	2	1181	1318	1121	1738	688	3	2	1220	3	2	3	1083	1583	1310	1024	624	2	1047	827	1209	1307	1584	3	2	1285	735	3	834	1153	746	2	683	3
1707	5492	13151667	57	57_5492	1101	2166	2318	2	2984	2078	2908	3331	5579	1316	1760	3	2	2082	1897	1926	3	684	2840	2554	1918	2781	2313	1903	2023	762	496	3577	1257	2	1185	1868	663	581	2023	2247	711	1322	3
1708	5525	13206667	57	57_5525	28101	22462	23695	6425	30035	30439	32276	27480	33038	29590	26570	23929	34519	21810	32949	27674	35592	53676	22988	25582	24420	21140	22452	22678	33365	31103	21097	27162	29097	30132	29065	25529	27723	20457	19767	28697	25317	26738	2
1709	5558	13261666	57	57_5558	3	2403	2108	2	3	3720	2	3	2	3	2	2489	3	2	6025	3	2	2273	4699	4408	3	2	3	2	4795	3	2	3	2	3	2884	4494	2	3	2	3	2	3	2
1710	5560	13265000	57	57_5560	4953	3509	3141	3	9699	8587	973	3960	6092	4203	2310	5017	10938	2680	4325	2003	4331	3706	3208	3736	2793	1768	2545	2272	3491	3067	2275	3347	5377	4336	4306	3312	2418	2356	2639	3759	2357	3071	2
1711	5592	13318334	57	57_5592	3615	1809	1476	3	3616	2352	2	2446	4170	7571	1001	1867	8469	5343	3191	3	2235	1450	2442	2748	4882	2964	4110	3959	2403	5014	4204	5319	1907	2003	2253	2528	981	4416	4737	5501	4273	1594	2
1712	5637	13393333	57	57_5637	2591	3	2	3	2571	2	3	1801	3300	3193	2	3	6803	2226	2	3	1586	2	3	2	2184	1395	1830	1645	3	2446	1755	2470	2	3	2	3	2	1669	2064	2583	1738	3	2
1713	5701	13500000	57	57_5701	148696	97655	79189	324697	281216	189703	105553	120554	214971	299062	60497	196194	256872	239908	220830	95541	122732	147198	218367	113978	166942	91916	130016	149720	160636	185665	189533	224727	127347	85638	139643	190068	85355	167504	232395	237595	173863	88351	351220
1714	5780	13631667	57	57_5780	23248	16752	13864	42808	33836	24867	14486	17923	28868	40909	11868	26966	34492	31973	30238	14809	18286	26651	29231	20677	24310	16276	21839	21113	23863	30908	21952	29282	19471	16140	19289	23968	13587	21874	24286	30697	21194	16230	30963
1715	5824	13705000	57	57_5824	5646	3979	3372	3941	4568	4184	2094	3000	6120	7308	2302	3936	10199	5072	9458	3486	3931	4105	5701	6657	5459	2339	3868	2682	5538	4437	3417	5838	4572	4822	4692	5904	2546	3259	3855	6664	3256	3903	3
1716	5873	13786667	57	57_5873	4349	2982	2808	2601	3352	2884	1338	1984	4015	5657	2047	2791	8327	3516	6858	2866	2302	3487	3862	5349	3751	1579	3173	2	4711	3	1570	4626	3253	4038	3734	4607	1931	2621	2808	5709	2058	3216	2
1717	5904	13838333	57	57_5904	1563	3	2	3	2	1335	1560	937	1340	3	1340	1850	4152	2	2924	1078	1380	3	1158	2	3	1094	2	3	2	3	2463	2	1133	3	1300	2033	2	3	1583	2	3	953	2
1718	5990	13981667	57	57_5990	1851	1122	1300	3	2	3	2	935	2190	3	2	995	4227	1498	2925	1628	1869	3	1193	2351	1186	869	2	3	2263	2	3	2	1407	1738	1239	3	2	3	2	2529	1054	3	2
1719	6021	14033334	57	57_6021	2558	1621	1664	1415	2094	2781	1258	1995	3393	3472	1231	1567	5091	1687	4259	2756	2543	2118	2015	3054	2415	1285	1726	1167	3002	3619	2344	3402	2251	2518	1826	3216	1705	1542	1615	3473	1740	1709	3
1720	6106	14175000	57	57_6106	821	3496	3629	5622	5804	919	3984	3132	2	993	2946	3551	3	6327	1687	2	5061	242	4399	3	4622	2	3861	3534	769	931	3	986	2	3	6317	899	2688	3604	3823	8246	2	5139	3
1721	6152	14251667	57	57_6152	29553	22166	23261	30317	18389	23697	19469	21331	37470	30559	13515	18740	40037	24136	34249	18816	25408	36771	26282	26434	27017	15737	19950	18814	28636	30251	20428	32655	20463	20424	20346	26652	15485	19241	20941	29413	23977	18243	2
1722	6191	14316667	57	57_6191	258728	161995	135420	387011	156324	305586	216164	237260	466386	287820	92916	134729	485402	155826	131171	182691	272942	230271	249417	96279	82504	215858	166145	149961	77100	100563	58114	358312	136342	197843	50840	95287	27451	154388	148281	309278	48213	38948	121835
1723	6236	14391666	57	57_6236	17780	12697	13538	28167	15785	19417	19364	17971	32973	21551	13840	13562	27311	13420	17558	18322	21951	28612	14937	13273	12835	13146	13690	13270	17991	16272	10766	22206	15516	16604	14098	13408	13095	12160	12443	19554	12321	12342	4351
1724	6268	14445000	57	57_6268	3	1601	2	3	2	3	2	3	2	3	1299	1499	2	1846	3	2	3	2	3	1559	1237	2	3	2	3	2	1130	3	1575	2366	1178	1349	688	2	331	3	952	916	2
1725	6309	14513333	57	57_6309	3	2	3	2	3	2	3	2	3	501	2	3	2	3	2	3	2	3	2	3	2	3	2	3	2	3	2	324	3	2	3	2	3	237	2	3	2	3	2
1726	6351	14583333	57	57_6351	3	2	3	2	3	2	3	2	3	2	3	2	3	558	2	327	3	2	3	2	3	2	3	2	3	396	237	2	3	2	3	373	2	413	302	650	262	3	2
1727	6391	14650000	57	57_6391	916	400	3	3004	2	959	553	823	3523	2053	3	869	1524	1344	1325	409	751	934	952	939	1044	549	616	2	1135	1046	548	1635	329	661	718	791	3	781	732	1104	688	292	2
1728	6424	14705000	57	57_6424	4331	2731	2627	8130	4279	5255	3721	2442	7513	6792	1959	3038	7094	4690	7905	3972	4159	3424	4576	6006	4026	2373	3351	3027	5117	4363	2371	6411	3356	3662	5260	3876	1919	3204	3356	7184	3016	3948	3
1729	6454	14755000	57	57_6454	246	331	436	577	590	417	2	3	1139	801	2	601	646	624	649	418	624	365	732	1472	582	241	3	435	447	537	742	618	422	783	562	495	2	335	3	958	327	523	2
1730	6488	14811666	57	57_6488	458	3	2	826	3	2	3	2	3	1132	2	3	2	3	2	3	2	3	2	3	2	3	2	3	863	2	285	3	2	277	3	2	3	2	3	2	3	2	3
1731	6537	14893333	57	57_6537	2	3	2	284	337	3	2	3	2	547	3	2	3	2	3	2	3	2	3	2	3	2	3	2	3	2	3	2	3	2	3	2	3	2	3	2	3	2	3
1732	6571	14950000	57	57_6571	1408	1768	2578	2395	2295	1600	3130	2198	2543	2025	2936	1589	2232	1661	1905	3142	3091	5672	1310	2303	1344	2092	1665	1912	1311	882	2225	1414	2800	3215	2838	1235	2939	1747	1420	618	2414	2535	2
1733	6613	15020000	57	57_6613	3	2	3	2	559	725	347	492	3	2	3	2	3	2	3	531	702	1058	2	949	3	2	3	2	3	573	221	2	3	919	2	3	2	3	2	3	605	2	3
1734	6714	15188334	57	57_6714	663	2	3	1912	761	886	2	3	1276	1679	2	627	1197	666	3	2	3	1112	2	3	2	3	2	3	710	443	232	1428	2	521	413	303	3	529	382	1173	2	3	2
1735	6753	15253333	57	57_6753	2477	1693	1695	4679	2380	3362	2242	1737	4364	3816	1187	1887	4423	2264	4435	1893	2426	2979	2134	3511	2067	1222	1705	1562	2761	2438	1458	4198	1893	2121	2824	2134	1254	1855	1339	4062	1730	2084	3
1736	6787	15310000	57	57_6787	3064	2024	2034	3894	1694	2541	1322	2	4225	3880	950	1630	4611	2467	3726	1554	1896	4160	2173	2489	2469	1018	1838	1643	2845	2633	1497	4616	1645	1853	1677	2418	1117	1597	1693	3153	1945	1439	3
1737	6849	15413333	57	57_6849	369	433	2	4761	3	2	387	3	2	2849	3	2	3	2	795	3	2	1862	3	2	3	2	3	2	3	2	171	3864	3	2	311	335	3	2	391	1340	3	2	3
1738	6899	15496667	57	57_6899	2253	1308	1137	1668	911	2	1180	1187	4432	2242	3	1306	2992	989	1075	2	763	1975	1505	589	621	485	3	761	1047	927	358	4416	531	909	493	697	2	1199	1112	3112	868	469	3
1739	6939	15563334	57	57_6939	608	429	630	742	2	3	2	3	2	361	3	2	747	3	682	375	2	715	3	491	426	2	3	2	224	660	329	745	3	2	3	643	364	2	3	2	649	413	3
1740	7004	15671667	57	57_7004	7784	4505	4953	12350	4868	7218	5471	5494	13341	8666	3021	4724	11498	5863	9138	3969	7670	9779	6744	6743	6414	3576	4070	3737	7339	9278	4716	13071	5368	4352	5204	6376	3667	4777	4377	9086	6148	4297	2
1741	7074	15788333	57	57_7074	822	340	3	1695	1004	1242	2	3	2	3	2	582	1489	1117	1253	511	3	357	1000	910	583	2	412	519	756	1093	516	3	503	597	807	635	2	598	362	1016	3	468	2
1742	7104	15838333	57	57_7104	7843	3907	3745	11475	2802	4342	3182	2079	13131	7967	1618	3567	5103	3197	7663	1701	2325	5205	5412	2602	4463	3053	4256	1624	5312	3776	1917	9315	5418	2182	2884	6342	3870	3546	4734	6135	4836	3114	2898
1743	7141	15900000	57	57_7141	1584	3	1082	1859	1031	1555	1307	917	2350	1445	2	999	2032	906	1778	1388	1583	1433	1274	3	1183	953	1083	2	1541	1380	643	2111	1188	994	1086	1433	975	939	1073	1549	1010	1014	3
1744	7172	15951667	57	57_7172	669	2	375	3	437	2	3	2	3	2	3	585	2	332	916	3	335	524	2	3	601	395	490	2	3	474	2	3	562	268	2	659	429	3	558	834	367	363	2
1745	7231	16049999	57	57_7231	3	2	3	2	3	2	357	3	2	3	2	205	579	3	2	3	2	3	2	393	3	2	3	2	3	2	3	291	2	3	2	3	2	3	2	3	2	3	2
1746	7261	16100000	57	57_7261	19235	17071	19941	7627	12370	14512	26173	27892	36738	13959	4684	17295	34504	14724	31549	9649	35769	15424	15870	33765	15723	6883	3047	13072	19404	22389	16460	25044	4049	15009	9060	25448	15965	17959	13221	24204	23564	23635	35355
1747	7316	16191668	57	57_7316	3	2	3	2435	2157	2898	2	3	2	2720	1008	2029	3	2124	2	3	2	3064	2596	3	2	1073	1052	1684	3	2	3	2	1119	2321	3	2	3	1847	1811	4024	2	3	2
1748	7371	16283333	57	57_7371	17998	8712	9284	29518	8938	15832	8930	8686	30138	22675	4464	8114	26393	11475	19639	7257	12405	24227	14356	13375	13236	5371	7930	5921	15923	18392	7751	27621	8644	8256	8820	13194	5650	7945	8099	20320	10513	7149	18560
1749	7405	16340000	57	57_7405	971	3	2	3	1194	1540	1051	997	2528	1382	2	737	1974	863	1596	848	1418	1678	964	1415	1318	568	3	2	1149	1516	932	2191	584	767	815	3	843	645	2	1176	932	847	1113
1750	7477	16459999	57	57_7477	656	422	490	672	425	459	629	976	1366	693	3	436	1201	437	953	2	961	676	508	692	328	212	3	2	373	665	398	1074	3	400	2	478	351	354	394	946	589	363	800
1751	7522	16535000	57	57_7522	3	2	3	265	2	3	273	2	3	2	3	2	375	3	2	3	2	3	2	3	2	3	2	3	2	260	3	2	3	2	3	2	3	2	3	2	3	2	3
1752	7582	16635000	57	57_7582	542	2	3	897	414	543	326	2	1011	797	3	304	1163	2	791	3	585	970	523	527	534	245	2	3	377	766	2	1108	3	360	459	446	2	3	2	567	308	307	579
1753	7677	16793333	57	57_7677	342	3	2	241	3	2	3	2	3	2	3	2	442	345	3	2	3	372	2	3	2	3	2	3	2	264	254	481	3	2	3	2	3	2	3	2	3	2	255
1754	7770	16948334	57	57_7770	601	3	2	1126	3	521	662	2	1126	826	3	2	970	385	653	3	626	915	509	607	417	323	2	3	517	657	299	1141	360	303	2	402	3	2	3	736	346	2	720
1755	7830	17048334	57	57_7830	457	3	2	1448	360	396	387	3	1298	928	2	261	965	358	582	3	2	851	446	3	333	2	3	2	367	521	3	1405	245	2	3	2	3	2	3	837	2	3	533
1756	7900	17165001	57	57_7900	198	2	3	2	3	294	356	2	3	2	3	2	3	2	3	2	3	377	2	3	2	3	2	3	2	3	2	3	277	2	3	2	3	2	3	2	3	2	3
1757	7937	17226667	57	57_7937	10257	4127	4053	20605	4342	9142	4494	4096	20053	14918	2081	3992	15251	5569	9547	3319	6683	15228	7438	6085	6382	2474	3785	2576	8348	9902	3151	20778	4466	3925	4168	6520	2481	3730	3671	12211	4630	2724	8722
1758	7976	17291666	57	57_7976	4597	3303	4882	5630	3021	4390	18781	16817	25162	1726	912	2	18520	3	11107	16859	19772	600	2	5099	3	2	3	2	3	557	2	3	3548	2	3	2	3	2	3	2	3	2	3
1759	8059	17430000	57	57_8059	579	396	412	467	2	317	1044	3	1476	372	2	306	1285	258	561	3	1096	479	2	575	323	3	2	3	374	395	294	550	334	331	2	346	3	345	2	511	476	3	444
1760	8101	17500000	57	57_8101	2	3	2	3	755	2	235	3	2	641	3	2	281	1356	3	2	3	2	3	2	3	2	3	2	3	203	2	3	2	3	2	3	2	3	2	3	2	3	2
1761	8146	17575001	57	57_8146	184	3	2	320	3	206	2	3	2	362	3	2	282	3	2	3	2	385	3	2	3	2	3	2	3	2	3	2	3	2	3	2	3	2	3	2	3	2	140
1762	8203	17670000	57	57_8203	360	3	2	3	2	3	323	2	447	3	2	3	677	2	820	543	690	3	2	435	433	3	2	3	2	921	465	3	2	3	618	549	605	2	3	2	588	507	354
1763	8563	18270000	57	57_8563	141	3	2	3	2	3	2	3	2	3	2	3	2	3	2	3	2	325	3	2	3	303	2	3	2	3	2	423	3	2	3	2	3	2	3	2	3	2	3
1764	28	4045000	58	58_ 28	69926	70509	217557	50743	145658	100512	109321	131485	79916	79715	57040	109297	203859	80131	114297	162498	129251	87613	130518	87017	142290	152024	134614	117549	61453	103512	148598	2	89823	89618	77673	124060	83223	105621	130238	92939	126769	132892	114436
1765	92	4151667	58	58_ 92	6509	1426	3	1336	2	3	76291	107936	54447	2	3	2	3	2	3	119733	2	3	2	3	2	3	2	75755	3	61224	2	3	41657	2	3	2	73434	64452	3	2	93452	90729	3
1766	135	4223333	58	58_ 135	50504	20081	110803	17350	2	3	55857	2	32652	8967	46505	3	63698	16204	2	3	82883	40688	46106	29161	56868	77919	59468	56011	7898	40781	68930	53591	30046	65316	63937	43010	2	49101	46815	34987	74435	3	51970
1767	197	4326667	58	58_ 197	3628	5521	52957	2225	2	3	24002	33225	15093	2930	7189	2	33031	10082	33345	50405	43887	3326	27187	21031	48235	3	2	3	6663	34788	54987	2207	12026	43897	54873	35564	39891	2	18869	19952	33972	44579	34668
1768	240	4398334	58	58_ 240	3	7516	37258	2	23881	13600	17167	17045	3	2	14759	21090	3	2	23108	35333	3	2	20303	11248	32513	42417	25863	25424	3	25596	34885	2	14197	22308	13613	23472	33456	23158	3	12362	2	39741	30910
1769	272	4451667	58	58_ 272	34496	30824	83011	70916	82483	56133	59843	41213	77665	51379	83593	61977	52279	20605	50572	81555	56388	63006	54143	47782	46683	77844	67686	62269	40083	56805	71133	63413	78865	73853	66083	53015	90726	62674	46376	50107	75076	62168	68714
1770	311	4516667	58	58_ 311	861888	949594	1473638	1229920	1654668	1785188	2385856	1593710	952077	834946	2176797	1726272	657477	1403781	1408245	2713149	2553836	1081441	1353309	1487071	1485341	1530161	1597972	1279562	1898286	1453251	1280267	386076	1968313	1916898	2082190	1931037	2626239	1398777	1591302	1025180	2004456	2435001	1784192
1771	362	4601666	58	58_ 362	3	2	3	8266	1017	1320	1626	2	7031	3	2	3	1801	4193	627	2	1383	3	2	1192	3	2	3	2	3	2	3181	2141	3	2	3	973	2	3	2	3	2	3	2
1772	417	4693333	58	58_ 417	5173	4251	3	2976	4718	2378	2988	3651	3408	3932	3378	2692	4265	2	3956	4428	4386	5153	1830	2298	2577	3	3882	2	3	2	4861	2892	3237	2658	4221	3177	3281	3	1832	5617	2	3137	3054
1773	482	4801667	58	58_ 482	3	2	3	2	3	2	3	2	3	2	3	2	3	2	3	1646	2	3	2	3	2	4331	3	2	3	5363	2	3	2	3	1833	2	3	2	3	684	2	3	2
1774	526	4875000	58	58_ 526	3	994	2853	2	1983	801	1377	3	2	844	3	4144	2	3	2	3	5108	2	546	3	1436	8870	2	3	5211	2	966	3	2	3	2	3	2	3005	3469	3	1095	2539	2
1775	539	4896667	58	58_ 539	6141	12155	24353	2605	3	1087	19746	10708	5995	1994	3511	9954	7494	10047	4710	9479	15205	6534	6314	13282	6157	13995	8917	2	6484	18312	7167	2314	12061	50751	8405	2450	9048	13223	10450	14958	11716	18114	10843
1776	593	4986667	58	58_ 593	3	2	3	754	2	3	2	3	2	3	2	3	2	3	2	3	2	3	2	3	2	3	2	3	2	3	2	3	2	3	11541	2	13039	3	2	3	2	3	2
1777	604	5005000	58	58_ 604	4835	6314	21500	3	13545	2	3	2	4508	1945	11693	13283	3	16248	2	10065	20043	3	12652	17388	9275	18069	18449	18204	17149	24831	16954	2378	11093	19111	16107	3846	16046	16799	15681	2008	2	24892	3
1778	653	5086667	58	58_ 653	4168	11461	31711	3973	20736	23419	22628	28301	2549	1962	22393	21475	2842	21679	16683	27206	30618	2	15713	23479	19093	30974	24308	26516	24583	29469	30245	5040	17292	29509	27908	25288	26205	23246	20594	3084	34899	34966	20355
1779	715	5190000	58	58_ 715	131634	98583	122046	193828	136941	121734	199120	184703	226925	91180	100403	50892	92310	58299	86152	113306	123303	75442	81443	117543	70052	62116	57682	75091	64226	74211	82995	39534	177616	107282	98973	85358	98556	54026	63169	32994	95575	92067	62611
1780	770	5281667	58	58_ 770	3	2	3	2	3	2	3	2	4267	2528	3	2	4128	3	2	3	2	3677	3	2	3	2	3	2	3	2	3	1524	2	3	20578	2	3	2	3	2	3	2	3
1781	806	5341667	58	58_ 806	6674	7926	18724	5086	12769	24410	16890	24565	12670	1930	11221	7606	4137	1381	13593	16115	17134	4398	6312	7704	15388	1719	10070	2	15221	11999	21427	1921	8212	10717	20047	21568	16343	8822	12875	1113	23666	24497	13520
1782	836	5391667	58	58_ 836	753	3877	3	2	3	2	3	2	654	3	5948	2	3	2	3	2	3	2	3	2	3	841	2	1009	3	2	3	2	3	2	3	2	3	2	3	1968	2	3	2
1783	899	5496666	58	58_ 899	19044	23791	31203	11138	20594	20337	32280	32898	16849	11894	24343	2764	18752	23970	25521	39809	36991	15980	21320	31153	30070	4054	27383	29307	23180	26562	45844	15103	21446	11257	35116	33706	43191	24744	10410	23501	31802	42001	32452
1784	932	5551667	58	58_ 932	3	2	3	2	3	2	3	2	485	3	2492	2	3	2	3	2	3	2	805	3	2	3	2	3	2	3	2	3	2	3	2	3	2	885	3	2	5695	3	2
1785	980	5631667	58	58_ 980	35324	22344	45983	22432	12141	11803	83531	87221	200419	9227	14514	7921	72588	8298	27778	68525	64927	14536	12793	21627	19871	8607	9772	12335	9269	20743	16042	6555	69613	50050	19498	11520	16512	7997	11198	7284	18158	28135	12190
1786	1025	5706666	58	58_1025	3	2	3	2	533	3	2	3	2	3	2	633	3	2	1325	3	2	3	542	2	3	2	3	2	3	2	3	2	3	2	3	2	3	2	3	2	3	2	3
1787	1061	5766667	58	58_1061	48387	35682	48712	50974	56867	70219	45966	45555	55804	59029	56094	53483	44940	53118	43559	46954	53501	64351	44485	42964	41139	48584	58975	59071	59938	45427	44058	69895	64503	59923	65394	47891	49449	63963	63472	59201	58073	49060	46864
1788	1111	5850000	58	58_1111	1558	2663	2325	1564	4397	1495	2922	2292	2090	2	3607	3969	1505	2633	1969	2798	3594	398	2731	1106	1490	4382	2866	4279	1689	1425	3917	1567	3070	5020	3	1651	2826	3530	2073	1963	1008	2539	2197
1789	1173	5953333	58	58_1173	3680	2765	6974	2	3	1823	10128	8458	11814	5239	2	3282	8365	3	2013	6271	9368	10349	1710	8412	7100	3976	5213	2844	4163	5479	8228	6482	4523	6216	13161	3960	7418	3066	4899	2889	2	7938	7614
1790	1219	6030000	58	58_1219	13514	11323	19533	15675	13795	14794	26740	21006	25823	11963	14558	12711	20072	4927	27262	25993	32740	18963	20606	21828	34367	19467	15782	17463	38417	26150	24271	15494	14996	13293	25070	23803	27253	16296	13988	16592	17136	29115	26943
1791	1253	6086667	58	58_1253	3	2019	2	1894	2663	1604	5840	3788	2441	1184	3	3615	2919	2555	4086	6494	6420	2273	2	3	5900	2	2928	2830	3	6621	6304	2	5932	3	4611	5935	8698	2160	3200	2	3	7233	6329
1792	1278	6128334	58	58_1278	697	2734	4312	2	1658	2632	14154	9840	6191	1717	1264	1898	3	2633	2	3	3176	1873	2	1585	3	3856	1729	1137	2	3	612	1748	4963	5480	3612	2409	1308	1167	2179	1662	2861	2364	3037
1793	1334	6221667	58	58_1334	11619	15586	17779	9292	13581	7055	12768	9462	8963	8538	13256	15400	10657	12633	16197	12992	12801	8519	2	10431	15182	17459	3	15668	13404	15839	11814	9568	16566	20282	15370	10227	16174	2	15670	11866	8518	14355	19557
1794	1368	6278333	58	58_1368	3	2	3	1059	469	633	2	1628	3	1293	2	3	750	971	2	3	2	478	3	2	2141	2155	3	2	3	3646	1994	2	3	2	3	2	3	2	3	2	859	3	2339
1795	1423	6370000	58	58_1423	15192	13480	19219	82897	42855	24478	27366	17695	12180	38860	37029	26752	8980	1988	9546	4745	5866	2114	2026	4144	9817	4149	2063	3025	3066	12136	2879	2	52736	48490	4056	8291	7923	3	2006	1060	2319	6617	2
1796	1473	6453333	58	58_1473	2653	3	6272	2140	7580	613	753	2	3	804	7079	6162	2	3	2	3	2	544	3	2	3	561	976	2	3	2	3	2	6753	6849	3	2	3	2	1892	3	2	3	2
1797	1528	6545000	58	58_1528	3	2	3	2832	3015	1143	4948	2523	1805	1109	2	2263	726	987	2387	2265	3	2	2009	1663	3092	1058	1619	3	1320	2841	2133	2	3835	3817	2127	3	1840	2	1121	2166	1353	2681	2509
1798	1561	6600000	58	58_1561	16613	11256	14392	16211	15138	35579	19667	23395	37492	25440	13809	7670	31764	22977	15397	15885	20068	28844	7325	20994	15736	9302	15574	11587	19394	14754	17898	25634	12242	10520	26037	16960	15134	16029	15936	14912	32447	15629	18103
1799	1632	6718333	58	58_1632	3	2	3	2	3	2	3	2	3	2	3	2	3	5208	2	3	2	3	2	3	2	3	3595	2	3	2	3	1645	2	3	2	3	2	3	5355	2	35067	3	5555
1800	1635	6723333	58	58_1635	49352	48491	50733	51993	44773	34025	53540	70235	123259	43411	47427	48808	47846	38147	58475	47642	43418	44365	59434	42165	53348	51941	43984	50933	52000	55407	46770	53442	53405	52283	37946	47686	48122	46534	41547	63322	18462	43564	46102
1801	1671	6783333	58	58_1671	22060	18015	32619	3670	2217	2	69917	47312	61860	3132	5111	1882	42282	3	10811	50558	52822	5525	8135	9242	9632	2751	2187	5281	5980	14344	7353	5935	46242	35514	8728	7372	8668	2433	4973	4987	2	16951	15847
1802	1728	6878334	58	58_1728	1644	2048	9572	922	2966	4042	8210	3	2	3	7422	2	1805	811	3	9068	8090	2	3028	3	4619	4729	3050	5111	3029	6722	8746	2	9239	8244	16379	9241	14628	3109	5620	1178	11019	11807	9869
1803	1743	6903333	58	58_1743	3	2	3	2	3	2	3	2	2941	3	2	3	2	3	2	3	2	3	570	2	1099	3	2	2248	3	2	7147	3	3001	2	12700	3	13928	5774	2	3	2	3	2
1804	1778	6961667	58	58_1778	9626	9613	10607	2019	3	845	469	5410	1640	2899	4661	3584	5130	5727	8767	1069	684	8599	12688	4368	9762	11865	8590	13554	8910	22471	27585	16626	2	12703	24926	30130	44240	14427	16383	25990	29996	33724	45015
1805	1813	7020000	58	58_1813	1552	3	1567	2	3	2	3	676	2	3	2	593	3	2	3	2	3	2	3	2	3	2	3	2	3	2	3	2	3	809	750	2	3	2	3	2	3	2176	2
1806	1864	7105000	58	58_1864	3	2	3	769	2530	2	3	2	3	420	2	3	700	566	1028	2	3	705	2	1018	3	2	3	2	3	2171	1123	2	3	2	3	2394	2968	2	3	2	3	4176	2
1807	1881	7133333	58	58_1881	5835	6056	5283	3995	3776	2089	3	4016	2364	2771	3280	3156	2	1770	1344	3206	3273	3886	2625	2462	1992	4313	3	2520	1999	1944	3606	699	59655	11468	4764	3101	2	3	2	1711	1268	12541	2071
1808	1933	7220000	58	58_1933	9705	8831	9038	2372	3	5595	13015	13440	13167	1031	4461	4624	21267	2026	41297	25450	24523	325	7318	26033	44898	8618	6497	4740	19545	56982	15489	7539	8924	4553	22729	53559	22248	6610	6919	7170	18265	2	19017
1809	1964	7271667	58	58_1964	3	3172	1015	2	3	1990	2	3	2	3	2	3	2	775	3	2	3	2	3	2830	4460	2	711	3	1537	4895	2731	2	3	2	3404	5686	3181	3	2	3	2	3	826
1810	1995	7323333	58	58_1995	13281	13235	18551	5777	5823	4084	57530	54386	105201	7088	7404	2	37566	7427	23815	49048	48128	8533	13608	15065	29042	7220	6264	8634	6913	16414	14646	4459	30004	19175	9408	13995	13791	3312	6483	4833	7429	16340	10577
1811	2029	7380000	58	58_2029	3	2	3	2	3	2	672	1229	3	2	3	2	3	1170	2	3	2	3	2	3	355	2	3	2	3	2	3	2	1763	1820	3	2	3	2	3	2	3	2	3
1812	2066	7441667	58	58_2066	538	2	3	2	1151	3	2	42751	3	2	3	2	3	2	38203	3	2	10877	3	34469	39198	2	7804	3	2	49855	14509	3	2	3	2	3	2	7542	3	2	3	2	15136
1813	2147	7576667	58	58_2147	3	2	3	2	3	2	3	2	3	2	3	2	3	18384	2	40518	3	12627	2	18076	3	16604	20827	33731	21317	2	25445	13904	3	2	54804	19161	34512	12620	23189	19304	42941	3	21452
1814	2150	7581666	58	58_2150	74430	50839	72028	118143	86257	97734	50377	2	102475	113244	76449	77040	37732	55156	78264	85577	47630	54077	72980	64324	74169	72013	64577	76086	66921	68173	69238	57668	93942	88275	61040	68310	73423	63293	63512	72681	62223	39899	72238
1815	2181	7633333	58	58_2181	70877	70395	87654	79687	77119	3	71952	66649	115646	63184	2	3	74560	2	3	2	88834	3	22046	2	22777	3	2	1989	3	2	3	2	3	2	3	2	3	465	2	3	2	68027	3
1816	2277	7793334	58	58_2277	6045	8684	15212	4203	8257	4775	2	11122	12405	4814	5959	7277	9291	6202	12691	3	16627	5428	6250	15287	13610	6575	7186	2	6357	11868	12854	3679	5766	6850	18645	13467	21096	8185	6346	5472	19885	18404	17868
1817	2329	7880000	58	58_2329	6838	7416	8064	4263	9155	6520	11557	12013	7685	4372	6539	7030	6465	5410	11522	10987	10723	4001	6758	11977	10642	7089	7682	7508	9045	11008	3	1119	6778	5082	6997	9731	8879	2	5899	6092	5793	10306	8067
1818	2366	7941667	58	58_2366	13094	13787	13891	17355	12810	9446	22525	19963	22982	14016	13087	14374	13662	10789	19463	18447	19981	12449	17287	14835	16873	13058	12480	15102	19131	19803	15739	15777	14318	13326	13379	15312	18902	12668	10520	19054	11766	17135	15232
1819	2414	8021667	58	58_2414	3	2	3	2	3	2	3102	1815	1962	3	2	3	1602	2	3	2	3	2	3	2	3	2	3	2	3	2	3	2	3	2	3	2	3	2	3	2	3	2	3
1820	2455	8090000	58	58_2455	2	3	2	1928	3	2	2839	3256	2264	3	2	2358	3	684	2	3	1951	553	2	1043	1172	3	851	2	1293	3	2	647	3	2	3	2	3	1283	1115	2	3	2	3
1821	2494	8155000	58	58_2494	3486	4478	6708	2	5857	3606	24861	21104	17642	1358	3043	919	3137	767	3212	8999	5773	1001	2244	1747	1236	1321	550	3	2	1110	611	3	20194	4825	1397	1186	2	753	1394	1678	3972	969	1682
1822	2549	8246667	58	58_2549	1978	3	1122	1875	1816	5997	2235	3729	6467	3292	857	2	4747	3099	4115	2145	2808	2935	3	3547	4589	1584	1639	1137	2	5046	4624	3160	1583	1077	5018	3542	3445	1318	2465	1694	3	1753	4483
1823	2600	8331667	58	58_2600	8006	6037	8872	3529	3844	2	15877	15960	3	3561	3879	4020	14015	2	16137	15752	16728	3174	4784	12542	15475	4305	3692	3272	5408	16615	12459	4089	5059	2848	11482	15589	15292	2955	3721	896	10758	11984	13259
1824	2641	8400000	58	58_2641	39954	27446	35654	19396	14319	11486	108747	109237	190056	14842	13574	14513	101704	12822	24232	88522	81846	9761	16722	14390	17798	13793	12672	13413	15438	20813	14737	12715	44298	16455	11600	15827	13401	11050	10509	16929	10269	14971	15104
1825	2690	8481667	58	58_2690	3	2	427	3873	2775	975	3	2	3	4327	3347	3638	2	3	5877	2	3	2729	5230	2984	3932	2	3	3668	4918	5020	2	4782	3	2	3	4894	2	3	2	5602	3	4313	2
1826	2728	8545000	58	58_2728	3	2	3	2	3	2	3	2	3	2	3	2	3	2	736	3	2	3	2	457	3	2	3	2	877	3	2	3	2	3	2	640	3	2	3	2	3	2	3
1827	2761	8600000	58	58_2761	6905	5203	5485	7666	6920	4614	8195	7392	8224	4721	6197	1846	8470	3513	14621	9653	9844	2232	994	9613	12882	5037	2254	5558	4428	14809	8316	2678	7379	8246	6764	11940	8169	3048	3227	1919	5871	8468	7634
1828	2843	8736667	58	58_2843	2490	1850	3014	2170	559	1905	2814	2694	2959	2072	2382	2673	4577	2344	7056	5063	5567	1903	3690	3865	5105	3783	3370	3725	1581	2628	1237	4152	2947	3078	1823	2026	1646	3451	5162	5910	1593	2199	2227
1829	2860	8765000	58	58_2860	2	3	2	3	2	3	2	3	2	3	2	3	2	3	2	3	2	3	2	3	2	3	2	3	2	3	461	2	3	2	1159	1017	3	2	3	2	3	2	1213
1830	2909	8846666	58	58_2909	674	448	3	353	2	3	2	3	2	3	2	639	3	2	3	2	554	3	943	2	3	2	3	2	3	2	1849	3	2	3	2	3	1890	2	3	2	657	522	2678
1831	2938	8895000	58	58_2938	3	2	3	2	3	2	3	2	3	2	3	2	3	2	3	2	3	2	3	322	360	2	3	2	3	646	1694	2	3	2	3	2	1932	3	2	399	3	2	1829
1832	2940	8898334	58	58_2940	1334	997	1184	2241	2379	2798	1593	1020	1222	2361	1136	3	1163	1835	1897	1495	1480	1330	552	1935	1459	972	1665	361	914	3003	2626	2795	1378	1094	1648	2270	2012	1443	2182	739	1551	1898	3795
1833	3030	9048333	58	58_3030	3992	3529	3892	3336	3120	2250	2214	2075	2637	5670	4774	4737	2640	5453	889	1209	1392	4842	7634	2345	489	8550	9276	9142	2	1037	3	11818	6518	6991	2	639	3	9810	14768	16005	2	965	3
1834	3093	9153334	58	58_3093	376	2	409	714	502	3	2	3	2	517	753	482	641	3	2	964	3	1057	1246	2	492	3	2	3	2	3	2	3	1316	2	3	2	3	2	3	2	3	2	3
1835	3126	9208333	58	58_3126	1614	760	658	1773	967	772	3529	3282	3337	1161	799	1199	2395	1034	633	1931	1413	1260	1315	2	1350	919	675	1047	3	762	857	2	1501	1210	3	2	1176	3	2	307	3	465	2
1836	3156	9258333	58	58_3156	3	2	3	2	3	2	1717	1624	1937	3	1118	887	2	1656	2898	3	1501	2	3	2085	2	3	2	3	2	2393	3	2	3	2	3	2530	2	3	2	3	2163	2	3
1837	3189	9313334	58	58_3189	16145	14470	13843	27220	43856	24994	16363	36042	17194	62410	23884	20975	31836	20014	39441	50002	18564	29824	37881	24140	44808	25479	14575	29819	24171	48147	16548	31596	23857	43302	15466	40019	13748	22331	21476	32683	19917	23564	69986
1838	3228	9378333	58	58_3228	1402	2	2196	3	2	3	2	2860	4190	3	2	476	3	532	2	3922	3	2	2291	3	2	3	2	3	2	3	2612	2	3	2	1540	5687	2956	3	2	3	2	3883	3
1839	3269	9446667	58	58_3269	2	3	3536	2533	2	3139	3007	3	1659	1322	3614	2959	5169	2013	6237	2	2843	3641	5874	5053	4885	4807	5063	5233	2845	5552	5237	2982	2428	2457	3356	7395	5836	3	6397	2196	4097	2	6820
1840	3319	9530000	58	58_3319	1409	626	3	1243	3209	4511	7401	7197	12642	4058	574	550	2828	2	1363	1125	1392	540	974	358	3	2	541	3	1472	1356	464	2	636	397	3	1075	2	1792	3	919	562	2	3
1841	3365	9606667	58	58_3365	10053	8498	10247	19736	12763	14802	22249	16569	28042	21865	14483	15395	23467	2302	24764	20257	21974	1736	6580	15726	20764	1479	3371	2967	11225	17385	3465	5645	8354	9158	5049	13052	4558	1611	2043	5103	3154	12909	3480
1842	3413	9686666	58	58_3413	4173	2755	3892	2335	2762	1453	1840	2	4813	1304	1596	1381	3946	1432	6399	2711	4313	1150	1703	4789	5556	2565	1697	2082	2030	5308	4476	2228	1333	2087	2859	5084	3495	1607	1774	3	2970	2451	4235
1843	3477	9793333	58	58_3477	2	548	3	2	3	2	3	863	2	3	2	3	2	3	2	1420	3	2	3	2	3	1572	2	3	2	3	2	3	2	1203	3	2	2737	839	3	2	3	2	3
1844	3532	9885000	58	58_3532	2552	2021	2	6104	6124	3376	1213	3	2	3523	2148	2739	3	900	2	639	777	3	815	1694	1315	2	964	666	3	2	1178	1355	4253	4294	3	2	3	2	3	1924	2	3	2
1845	3594	9988334	58	58_3594	4078	1803	2061	8074	3	1928	5110	4038	8520	2584	2	1412	8273	2059	8957	5573	6176	1225	2862	6515	8581	2113	1572	2131	3534	12836	1563	2669	1954	2191	7427	11120	8242	3	2805	3211	8712	8446	7594
1846	3597	9993333	58	58_3597	2	3	2	3471	1431	1821	3	2	3	2	664	3	2	3	2	3	2	3	2	3	2	3	2	3	2	3	2	3	1738	2	3	2	3	2	3	2	3	2	3
1847	3641	10066667	58	58_3641	1923	1633	526	2	3	2	827	3	609	1137	2	3	1810	945	1414	1192	912	251	907	1586	1568	605	594	822	2	2027	3	910	2	3	2	3	1315	603	751	2	3	687	1272
1848	3720	10198334	58	58_3720	2	3	936	519	293	2	664	3	705	2	3	681	2	3	1193	708	527	1139	2	696	3	2	540	3	2	2319	1147	3	2	821	922	1179	3	2	3	2	558	818	1380
1849	3776	10291667	58	58_3776	461	3	356	567	402	747	3506	3868	6310	334	644	2	3411	3	6604	2	4332	3	639	4106	5642	2	3	2	3	2	363	3	2	420	3	2	3	2	3	1010	2	3	2
1850	3774	10288333	58	58_3774	3	2	3	2	3	2	1295	926	3038	3	2	3	2	3	2	3	2	3	2	3	2	3	2	3	2	3	2	3	2	3	2	3	2	3	2	454	3	2	3
1851	3848	10411667	58	58_3848	3511	1939	2428	6308	4477	4571	26667	24098	44763	8757	4011	3797	7516	2479	7188	7710	5914	4302	2107	5990	7224	3028	3848	2258	2664	8308	6432	5218	1717	5682	4564	7146	5943	1484	1857	982	4973	4901	5608
1852	3880	10465000	58	58_3880	2	3	332	2	700	427	3	2	3	580	444	2	924	3	1016	2	476	479	3	1023	1710	2	3	2	3	1202	1288	2	3	2	3	1439	1214	2	3	2	660	410	3
1853	3930	10548333	58	58_3930	1208	583	673	744	2	743	2474	1570	4157	1173	3	367	1772	973	1887	1491	1786	331	373	2531	2271	2	1036	529	3	1079	1306	1086	974	884	846	1077	1184	759	1850	813	966	522	499
1854	3979	10630000	58	58_3979	1551	1659	2005	2143	1455	2366	2	3	3052	2440	1054	1266	1764	1387	3329	1424	2	1504	1888	2922	4461	1597	1813	2099	1076	2527	3	2098	1627	944	1556	2667	1514	483	2113	1406	1344	1869	1875
1855	4026	10708333	58	58_4026	1447	884	2	1286	1440	1043	1502	1875	3	2	1179	1028	1553	1235	3569	1765	1894	936	2066	3	1869	1453	1174	1396	2	2500	2588	1444	1582	620	1617	2520	2057	892	1596	3	1426	1958	2323
1856	4102	10835000	58	58_4102	13297	10901	13920	7430	9774	8503	4758	11934	5785	17735	9603	8660	7372	9111	13096	10982	5845	8494	11843	11965	13229	9193	10076	9213	7516	16969	11486	9289	12337	9487	19466	11982	9919	6111	9739	9264	9255	8037	19924
1857	4163	10936666	58	58_4163	2	3	2	731	3	2	3	2	3	2	3	2	3	662	2	3	2	3	2	3	2	450	3	2	3	2	3	2	787	877	3	2	3	2	3	2	3	2	3
1858	4202	11001667	58	58_4202	744	860	2078	764	2	955	3	2	380	1092	1477	1457	3	1242	1443	2	509	3	2017	2	745	1390	1575	1407	974	1557	1846	998	1464	1382	1288	3	2	1633	2294	1653	1064	2547	3
1859	4234	11055000	58	58_4234	1587	1656	2063	2342	1615	1252	2237	1937	2183	1764	1723	1602	1908	1624	3541	2868	1172	977	2228	1919	2581	1626	1733	1899	1463	2775	2148	1662	2088	2840	1633	2517	2182	1607	2254	2193	1889	2649	2713
1860	4284	11138333	58	58_4284	412	2	619	399	453	3	2	3	2079	2	3	2	1613	3	1403	2	3	254	2	1388	1919	3	524	2	3	1700	602	2	3	776	2	1419	1444	3	524	2	3	816	1169
1861	4314	11188334	58	58_4314	616	2	220	3	2	3	2	3	2	3	2	3	2	3	2	3	599	2	3	389	2	3	2	3	2	3	985	2	3	2	3	2	3	2	3	2	3	2	3
1862	4374	11288333	58	58_4374	2	3	2	3	2	3	2	3	2	620	3	2	3	2	3	2	3	2	3	2	3	2	3	2	3	2	606	3	2	3	2	604	3	2	3	2	3	2	3
1863	4382	11301666	58	58_4382	800	469	2	586	647	3	1227	815	2	3	360	290	841	878	730	616	922	2	563	3	2	3	2	3	1287	2	3	2	3	2	3	2	3	528	1030	587	2	3	2
1864	4417	11360000	58	58_4417	3430	2751	2494	20168	16856	15429	8872	9484	3252	3146	1971	1951	9615	1551	6871	7242	6672	1786	1525	4979	6463	1299	1775	1612	1647	8150	5620	1811	11446	10607	5929	6695	5667	692	2127	2165	6365	5334	6526
1865	4510	11515000	58	58_4510	1783	1110	963	1031	3	2	3	2	3	1260	2	3	1478	2	3592	1120	1061	3	696	2609	3273	581	2	756	1082	5235	3240	1473	3	589	3157	5179	2737	703	1299	1096	3578	3307	3450
1866	4542	11568334	58	58_4542	7171	6079	6494	3896	420	1010	2485	2391	2	9440	3	2	4511	7073	9906	2790	3335	875	11010	7552	11308	8235	9586	8000	3019	14144	9568	10408	4623	4645	7943	12314	9771	5738	10780	8869	8086	9471	10757
1867	4587	11643333	58	58_4587	3	2	3	6608	5340	5511	2256	2562	3619	2	1032	1297	3	694	2	3	493	2	1129	3	2	838	746	396	3	2	3	2	2662	2482	978	3	2	344	459	669	3	2	3
1868	4630	11715000	58	58_4630	966	2	382	468	1579	587	3	624	733	388	629	931	2	3	1304	783	2	3	2	1482	1672	3	2	3	2	2005	1107	3	786	1043	1287	1928	1227	2	3	2	1168	1429	1635
1869	4673	11786667	58	58_4673	2993	2231	2156	1845	1115	694	4078	4197	4428	3215	2224	2085	2914	2200	6004	3098	2828	2733	3745	4594	5667	2684	3106	2626	1891	6210	4172	3829	1980	2304	3840	5591	3966	2052	3799	3644	3908	4075	4597
1870	4717	11860000	58	58_4717	3	2	3	2	3	2	3	2	3	2	3	2	3	2	732	3	2	3	2	3	400	2	3	2	3	2	3	2	3	2	3	771	2	3	2	3	2	3	2
1871	4750	11915000	58	58_4750	3019	2735	2818	2920	2140	2609	2314	2220	3745	2146	1589	2601	2976	1923	4095	2610	2584	2152	2511	3736	5801	2067	2027	2321	2573	5163	4202	3069	2364	2979	4284	4892	3488	2444	2637	3800	3982	3707	4720
1872	4841	12066667	58	58_4841	3	2	735	3	2	3	2	3	1963	2	3	2	3	2	315	3	699	2	3	2	3	2	3	2	3	811	2	3	2	3	2	3	2	3	2	3	2	423	3
1873	4864	12105000	58	58_4864	15294	13010	16217	3396	2451	3173	9239	5702	8849	4036	1991	2692	9839	2344	10994	10926	13052	2557	3773	11475	3649	2900	2663	4416	3389	3626	9443	4658	4038	3849	10291	12121	8900	2092	2834	5282	10164	8912	3637
1874	4945	12240000	58	58_4945	2	3	2	710	794	3	2	3	2	966	3	1025	2	1499	11530	3	2	839	1880	3	7602	803	790	1000	1607	7736	7087	1707	2	3	8026	8793	7849	1106	1516	1832	9131	6615	9319
1875	4951	12250000	58	58_4951	16523	13482	15482	20871	15558	17178	7850	2	3	7899	2673	7314	2	8390	8645	12948	14233	6094	7281	10901	6713	4198	5988	6231	5216	7298	6879	5701	4972	4603	5252	6367	4467	6212	6912	7354	6330	3793	12734
1876	4992	12318334	58	58_4992	4798	3160	3282	3	11953	9554	2	3	2	3	2	3	2	3	2	3	2	3	2	3	2	3	2	3	2	3	2	3	5239	4723	2	3	2	3	2	3	2	3	2
1877	5037	12393333	58	58_5037	26819	24208	21829	36332	26560	33958	27154	28912	33655	7136	2450	1162	29092	6477	24719	27619	27127	4497	3998	25219	3	2142	2658	2812	2544	4449	2	1714	24964	25560	2010	3397	3371	1744	1711	3833	3368	3807	4774
1878	5101	12500000	58	58_5101	3	2	3	2	3	2	3	2	3	1364	2	600	3	841	14446	2	3	636	1910	2	3	2	3	2	3	2	3	2	3	2	3	1461	1829	2	3	2210	796	2	3
1879	5152	12585000	58	58_5152	24641	24499	17968	30421	24797	24925	39098	43370	47601	2156	1880	1377	41696	2221	39395	44853	40979	991	1184	18490	8550	2	633	1133	2491	2644	1882	1026	27073	33000	3	1176	1011	364	1421	1673	888	3542	1120
1880	5152	12585000	58	58_5152	2	3	2	32238	24854	26143	26970	3	2	3	466	2	3	2	3	2	24661	3	2	3	2941	2	3	377	1018	2	3	2	3	2	3	2	3	2	627	3	2	876	3
1881	5190	12648334	58	58_5190	3813	2122	3169	2	3	2	32050	35912	37784	913	3	2	32470	3	2736	35762	33116	2	483	1796	869	3	2	3	2	1902	1060	3	2143	2223	2	3	2	405	3	741	606	1009	619
1882	5245	12740000	58	58_5245	2	3	383	2	3	2	3	2	3	861	2	333	2708	866	3	2	3	5331	2	3	390	2	3	2	3	2	3	788	2	3	2	656	3	2	3	2	3	2	1448
1883	5288	12811666	58	58_5288	745	518	938	1552	1196	953	1047	2493	3	2	3	645	2	3	1005	4762	903	508	883	576	650	2	3	310	2	905	826	3	416	511	2	3	2	500	3	689	764	2	666
1884	5360	12931666	58	58_5360	3	2	626	773	467	668	3	2	3	2	3	436	2	3	2	3	2	379	3	424	347	2	3	2	3	657	2	3	684	374	2	502	3	2	3	2	3	2	3
1885	5467	13110000	58	58_5467	2177	1688	2041	2425	1190	1980	1884	1402	2885	2063	1660	1728	2698	1767	2939	1370	1640	1950	2390	2084	2666	1187	1885	1347	2660	2973	1838	2371	1492	677	1775	2382	1089	1523	2039	2484	1953	1693	2960
1886	5525	13206667	58	58_5525	6929	5792	6526	9391	8304	8374	9067	6668	8068	7390	7460	6328	6889	5701	9466	6565	9088	14160	6301	7216	7333	5938	5969	6266	8621	8737	6339	6580	8096	8222	8069	7285	7653	5592	5273	7347	7199	7352	7020
1887	5558	13261666	58	58_5558	733	450	199	5663	4022	4868	2	3	2	3	2	3	2	3	2	3	2	440	496	688	705	3	2	674	3	2	646	3	2121	1364	2	3	2	471	3	914	2	3	2
1888	5647	13410000	58	58_5647	3	2	311	376	504	3	1159	1178	1306	2	3	300	1299	2	898	1060	1243	3	2	255	412	500	3	325	2	564	806	3	2	277	3	747	2	3	2	3	2	3	2
1889	5701	13500000	58	58_5701	17339	10961	9373	38580	33755	23315	13932	14945	24233	35504	7521	23672	29297	28581	26780	12135	15674	18183	26223	13944	20608	11304	15982	18384	19253	21896	23160	27417	16094	10574	17699	23314	11089	20609	28403	27258	21928	11049	43372
1890	5742	13568334	58	58_5742	2237	1078	539	3834	2470	2780	448	1623	2536	3063	3	1962	2778	2405	2952	1298	1928	1877	2107	2458	2249	1199	1367	1977	2136	4021	2799	2881	2093	1384	2122	2440	2	1958	2154	3544	2690	1641	4649
1891	5780	13631667	58	58_5780	1701	1036	383	3462	2563	2275	1037	905	1777	3954	979	2325	2721	3172	2726	1324	1698	3074	3488	1576	2717	1369	1954	2233	1664	5633	2908	2325	1469	1274	1609	2708	1270	1465	1886	2251	1777	983	3865
1892	5825	13706667	58	58_5825	958	3	688	1487	467	2	516	3	1566	1980	2	3	1125	780	2482	1050	1100	873	1480	1653	2077	2	3	895	2	2963	1389	1619	937	3	2	1621	3	2	601	1054	551	3	830
1893	5922	13868333	58	58_5922	2	3	246	2	3	2	3	2	3	2	3	320	2	3	2	3	2	485	3	2	272	3	2	3	2	3	2	3	2	3	2	3	2	3	2	3	2	3	2
1894	6008	14011666	58	58_6008	405	3	2	3	2	3	896	827	1024	2	3	2	929	3	492	1151	1258	2	3	2	3	2	3	2	3	2	462	3	2	509	3	2	3	2	3	2	3	2	3
1895	6151	14250000	58	58_6151	2	3	2	3	2	3	2	3	2	3	14480	20607	2	3	2	3	384	2	3	2	3	2	21333	20420	3	2	3	2	22542	3	2	3	2	21974	22523	3	2	3	2
1896	6152	14251667	58	58_6152	32347	23894	26036	36753	19868	26754	21703	23057	41958	34539	7584	10961	44469	26490	39036	20624	28217	34132	29294	29753	30125	17614	12679	11940	32732	34390	22581	37327	11680	21954	21952	30013	16702	12600	11342	32148	26582	20286	42145
1897	6191	14316667	58	58_6191	19037	12415	11263	29256	12618	23555	17412	18196	32081	21779	3	2	34311	12331	10717	14240	21553	18916	18508	8122	6538	16883	3	2	6393	8014	5325	25874	3	15732	4155	7924	2427	2	3	22083	4225	3130	11023
1898	6236	14391666	58	58_6236	3033	2722	3051	5266	2882	3899	4388	3634	5904	4082	2716	2793	5054	2841	3487	2	4474	5771	2672	2862	3	2859	2439	2781	3637	3374	2557	3983	3019	3355	2297	3172	2637	2614	2544	3747	2700	2280	2808
1899	6269	14446667	58	58_6269	2	3	2	3	2	3	2	3	2	380	3	185	457	2	3	2	3	405	2	3	2	3	2	3	2	3	510	2	392	329	3	2	3	2	3	2	3	2	3
1900	6391	14650000	58	58_6391	607	570	617	1183	570	666	754	636	1638	843	2	550	1253	611	848	522	642	779	696	631	749	3	508	2	3	833	436	998	2	591	3	786	2	3	617	1269	656	490	1010
1901	6428	14711667	58	58_6428	2	3	137	290	311	2	3	2	3	2	3	2	3	2	3	2	3	2	3	2	3	2	3	2	3	2	3	2	3	2	3	2	3	2	3	2	3	2	3
1902	6475	14790000	58	58_6475	2	3	2	3	2	3	2	3	2	3	2	3	2	3	402	2	3	272	2	3	2	3	2	3	2	3	284	2	3	2	3	2	3	2	3	2	3	2	3
1903	6572	14951667	58	58_6572	2	3	320	2	3	2	3	2	3	2	3	2	3	2	3	2	313	911	3	339	2	3	2	3	2	3	654	2	365	325	3	2	3	2	3	2	3	2	3
1904	6788	15311666	58	58_6788	4003	2350	2449	3846	1648	2693	1990	1703	4649	4128	1152	1940	5374	2697	4261	1983	2781	4431	3408	2852	3082	1390	2196	1986	3374	3287	1777	4359	2136	2264	2116	3240	1554	2049	2241	3372	2369	1579	3970
1905	6835	15390000	58	58_6835	2	3	2	1021	3	2	3	2	875	565	3	2	631	3	2	3	2	373	3	2	3	2	3	2	3	2	3	612	2	3	2	3	2	3	2	3	2	3	2
1906	6938	15561666	58	58_6938	829	552	881	3	2	3	2	3	2	3	2	3	2	3	701	2	523	3	2	415	491	3	2	3	2	660	3	2	3	2	3	770	2	3	2	3	464	596	686
1907	7005	15673333	58	58_7005	10065	6186	6705	16351	5860	9526	7388	7518	17548	11807	3896	6116	15092	7454	11887	5558	10044	12295	8677	9288	8576	4522	5302	5249	9568	12052	6130	17605	7049	5815	6725	8587	4717	6317	5877	12164	8356	5766	13513
1908	7105	15840000	58	58_7105	759	2	373	1015	561	523	425	3	1726	895	2	326	3	2	756	3	2	605	598	3	557	2	3	2	3	2	3	1230	534	2	3	775	2	3	2	667	568	322	485
1909	7266	16108334	58	58_7266	2302	2052	2478	784	470	1114	4825	3895	4915	1044	3	830	5738	913	6082	5099	6778	1127	788	5140	3505	573	2	972	1552	5079	3146	1403	299	1019	4231	4489	3536	956	781	1269	4638	3545	3815
1910	7341	16233334	58	58_7341	583	3	601	2	3	2	811	1031	3	2	3	2	1365	3	2541	1330	2	3	2	1700	1417	3	2	3	2	3	1430	2	3	2	3	2	3	2	3	2	1302	3	1479
1911	7373	16286667	58	58_7373	1856	899	1034	2954	850	1643	865	628	3047	2592	2	940	2915	1012	2312	693	1705	3101	1632	1486	1185	624	822	407	1616	2258	997	2954	748	1088	1448	2118	1244	722	684	1965	1941	1149	2097
1912	7582	16635000	58	58_7582	777	3	454	1065	498	626	487	2	1220	1095	3	2	1160	3	866	2	584	1174	425	531	480	3	2	3	2	815	349	1296	483	510	3	537	2	478	3	817	2	3	703
1913	7774	16955000	58	58_7774	486	2	3	1056	314	2	3	2	1174	359	3	2	979	3	511	2	424	1025	371	428	3	2	3	2	3	519	2	1110	3	2	3	435	2	3	2	570	470	3	606
1914	7936	17225000	58	58_7936	1074	2	3	2104	2	1146	497	467	2361	1477	3	454	1378	625	752	2	912	1569	742	331	644	3	2	356	3	968	435	2384	2	467	3	607	2	551	3	1352	2	3	813
1915	7977	17293333	58	58_7977	2517	1553	3444	3279	1855	3015	10113	9367	15824	690	428	2	10492	3	5987	9011	11028	2	3	2075	2	3	2	3	2	3	2	3	1565	2	3	2	3	2	3	2	3	2	3
1916	8144	17571667	58	58_8144	2	3	2	338	3	2	3	2	3	2	3	2	3	2	3	2	3	436	2	255	3	2	3	2	3	2	3	2	3	2	3	2	3	2	3	2	3	2	3
1917	29	4046667	59	59_ 29	4103003	3789651	4011172	3393752	3820496	4191817	3776217	4211674	2430	4228865	4327122	4330903	3594236	4211730	3739009	3818943	4318889	3891754	7053	4311873	3821442	4203224	3968214	4010973	4324461	4361980	4071255	3954099	4314348	4334542	3906646	4177495	4114465	3992118	4126797	4168289	4354842	3857197	4142467
1918	92	4151667	59	59_ 92	7988	1029	4854	1465	10385	2	35862	32012	75753	4643	10614	6735	12931	7054	10064	13671	13654	3671	3	5025	5517	12391	8445	6376	2	2921	5222	3	8314	4755	4386	2	3454	7043	7224	8369	1439	5737	6134
1919	136	4225000	59	59_ 136	103851	89055	114708	70563	98391	81343	70582	55784	72273	61199	106125	74334	59071	80477	69159	85896	92803	115320	112000	69302	103238	125985	116282	127184	87759	174875	234624	169986	103143	135746	182085	235234	271464	126213	141103	168053	196340	221895	268448
1920	196	4325000	59	59_ 196	36248	40459	55566	10703	11128	10715	103806	99690	140801	14474	14355	13690	105327	15105	128153	120961	110963	15804	18396	118616	140772	17401	15740	16791	33052	125277	106401	14227	14915	69043	71906	99898	95965	12044	13334	16718	73699	68578	55228
1921	263	4436666	59	59_ 263	3	2	3	2	3	2	3	2	3	2	3	2	3	2	3	2	3	2	58234	3	2	3	2	3	40168	2	3	2	3	2	3	2	3	54219	2	3	2	3	2
1922	274	4455000	59	59_ 274	41401	38326	63007	66243	74177	56910	119407	93828	63624	59769	76235	59005	51841	50174	62730	67492	155448	62562	62906	57530	102293	75780	62086	60742	90683	63689	60129	59907	70912	85652	65689	91230	65069	65026	87656	61795	66123	120084	68562
1923	311	4516667	59	59_ 311	42320	45523	69112	58662	80144	85758	54718	68916	47149	41139	106422	81238	30900	65717	67405	129508	121576	49666	3	70384	67943	73562	76446	61658	5859	66121	55653	18942	95467	89459	99333	60580	125862	4795	73330	49791	95094	57664	83890
1924	361	4600000	59	59_ 361	12809	11807	13424	17864	20772	20494	17303	12578	17820	5398	4711	5456	10419	4640	22269	11466	8749	1728	5884	20969	10390	5745	6452	4534	2	2410	1023	3409	10258	15892	3220	5059	1093	3	4401	4270	2509	4165	4315
1925	409	4680000	59	59_ 409	957	1071	2	715	2626	2324	3	2	1061	1318	3	1444	2	1386	2280	1980	1585	1738	1534	1480	2211	2473	1963	1451	1095	3	2	1436	2146	1401	1309	1767	3	2734	1557	2543	3348	2	2431
1926	467	4776667	59	59_ 467	2801	3135	5441	4931	7408	5931	5016	4319	4271	3140	5362	4663	3035	3407	4572	5189	5783	4426	2438	4201	4552	4882	3632	4988	4499	2108	1672	3742	7341	6726	3711	5039	1956	3925	4421	5396	5133	5235	4642
1927	506	4841667	59	59_ 506	3478	4827	5612	3	1887	2628	4571	5382	2598	1136	1997	1373	2965	3990	3214	5133	4635	5545	2	4510	3081	4080	4757	3480	3350	3736	2848	692	2339	3	5318	2	3397	3621	4694	2788	6539	5279	3968
1928	555	4923333	59	59_ 555	37995	34759	43986	28147	40453	31386	14015	13270	19892	18382	10679	8166	19585	16740	25290	13988	11645	10265	6481	23228	29516	6292	16157	18816	13339	21335	21130	14578	34744	285985	15510	18560	10682	15351	18621	19227	21621	15538	14685
1929	655	5090000	59	59_ 655	6425	3	2	3	2	3	14283	8094	9426	4329	2	3	6310	2674	2	3	10260	2099	2	4953	4338	3	2	3	2	3	2178	2752	2	3	2	5407	3	2	3	2	3	2	2383
1930	717	5193333	59	59_ 717	485247	364609	408936	587042	517430	413978	682172	603696	699789	282725	250689	173820	293255	186190	163154	267759	258051	218876	153203	434455	159406	222850	135619	177823	184307	179208	194260	118142	675483	355395	312080	209007	278133	117384	180155	157293	232653	235506	156534
1931	686	5141667	59	59_ 686	138860	3	2	87466	182636	8870	204802	4981	6125	4647	264294	3	4251	3218	291830	324866	415219	3809	268461	2	224751	129394	165456	217599	3484	209842	219418	2793	243903	3	2	238332	248664	175204	161045	119356	5081	301474	155574
1932	752	5251667	59	59_ 752	3	4135	2	3	14144	2	3	2	3	2	3	2	3	2	3	2	3	2	3	2	3	2697	2713	2	3	2	3	2	3	2	3	2	3	2	2577	1099	3	2900	2
1933	792	5318333	59	59_ 792	6495	9738	5197	12978	14645	18115	20698	20971	21941	3138	5353	4768	5610	5327	8228	9847	10251	8750	3960	9001	3060	5616	5363	3488	5922	5863	6399	2498	5040	3556	11618	8650	8437	3648	4665	4045	10786	11730	10043
1934	817	5360000	59	59_ 817	3	2	3	2	3	1064	2	1263	1323	3	2	3	2	3	2	3	2	3	5251	2	3	2	3	5447	2	3	2	1653	3	2	1863	3	2	5276	3	2	2398	3	2
1935	899	5496666	59	59_ 899	27634	36290	37931	18455	30742	21307	58298	49297	30889	17602	33345	35670	28497	36572	36337	54976	50567	25625	35778	46581	40641	43487	39960	44276	31686	38866	53291	21889	32469	30283	43307	40500	56603	37255	34643	36401	33555	49761	44261
1936	980	5631667	59	59_ 980	188726	135941	176521	109226	54251	50522	567635	571911	953553	47626	59200	37117	387621	45958	171494	371059	331411	55397	76226	112924	106636	38538	39096	48966	61606	103793	58405	30040	340559	223963	74382	63590	66362	32403	45629	47914	59662	115534	48696
1937	1060	5765000	59	59_1060	252697	192727	220183	248390	269051	364226	209796	232123	255713	300079	246992	254299	234739	283229	223585	215829	242558	295730	228960	222119	206100	231874	284378	277058	320279	222839	213977	325338	287697	264129	293234	247441	215799	305133	295659	325901	256892	231449	215042
1938	1110	5848333	59	59_1110	8774	14395	3	8422	16311	6182	12887	11298	5736	9917	14433	15080	6138	13322	9164	12003	12012	6490	14733	11590	10152	19328	14189	17049	6585	6265	14772	7621	16235	16634	9282	8189	10537	15478	12168	11581	9525	13128	10629
1939	1173	5953333	59	59_1173	36878	20042	28522	29853	25305	56325	55091	63002	72479	39800	20835	14255	63298	41170	36799	36318	55614	61017	10763	62514	53106	21766	34289	25838	7118	33060	48332	39953	21615	17371	74617	47416	42374	29787	29814	32409	88785	51957	48389
1940	1219	6030000	59	59_1219	107555	95009	109574	99512	76982	78515	144598	136316	145268	83701	82459	76036	140081	135935	195680	139304	168422	112333	139702	144090	242037	109276	89046	113730	247283	167626	141681	95994	82136	68694	128642	169530	149614	93806	81763	123744	106190	174373	158047
1941	1251	6083333	59	59_1251	12605	15915	22674	12686	15482	13358	21646	18836	12759	8927	20542	15525	16041	12435	25980	26822	24728	13180	12919	23323	30284	16818	11242	15568	14495	27569	30983	11957	24858	24338	18219	31502	35766	10482	13074	15388	25714	30435	28863
1942	1297	6160000	59	59_1297	2	3	2	3	2	15164	32248	30324	21786	11565	3	2	3	20736	2	15175	14810	16490	3	2	13334	3	10358	12797	2	3	13740	2	3	2	24186	10522	15357	9129	16022	3	2	13632	3
1943	1334	6221667	59	59_1334	71494	83337	84998	51106	68536	39516	59648	51926	49147	44515	60719	75750	66297	67285	93227	68406	62758	50008	60795	61725	87196	82333	56428	80733	62527	78140	62084	47176	80052	91690	75687	58263	78903	60129	73222	59549	50499	71163	90391
1944	1367	6276667	59	59_1367	2	3	2	3	2	3	7506	7068	5643	2890	2	3	2	3	2	3	2	3	2	3	13324	4266	4220	2	3	2	3	2	3	2	3	2	3	2379	2	3	2	3	2
1945	1421	6366667	59	59_1421	33927	29068	27939	181176	111425	70831	27993	20649	21212	84451	62410	55054	17414	3956	22310	21721	23789	4166	5429	17088	19796	2476	3079	6397	5406	19381	18459	2444	111346	114180	12790	15989	17492	3078	3899	4155	16151	16340	15223
1946	1457	6426667	59	59_1457	3	2	3	2	8423	3823	1395	3	2	3	6728	2	3	1782	2	3	2	3	2	3	2	3	2	3502	3	2	3	2	3	2	3	2	3	2	1294	1347	3	2	3
1947	1488	6478333	59	59_1488	3479	3971	5532	13041	9900	21422	7072	5501	11081	15197	7650	7020	6626	9863	5019	3327	4968	10754	3993	6130	4732	2	6189	4214	11398	2283	3862	6544	7695	7974	6742	5164	2598	4060	4617	4367	7132	4139	4107
1948	1525	6540000	59	59_1525	3	2	3	2	3	2	3	2	3	2	3	2	3	2	3	2	3	1710	2	3	2	3	2	3	2	3	2	536	3	2	1674	3	2	3	2	3	2	3	2
1949	1561	6600000	59	59_1561	1853	3	2	6985	3967	4998	3231	3238	5805	3735	2433	1336	3950	3304	2154	2523	4043	5082	3	3820	2054	2	3	1628	2	3	2964	3432	1984	1846	4585	3060	2614	2	3	2	5280	3	2
1950	1573	6620000	59	59_1573	3	2	3	2	2279	6564	3	4208	2	3264	3	2	3	2	3	2	3	2	1182	3	2	3	2	3	3163	2	3	2	3	2	3	2	3	2	3	2	3	2	3
1951	1627	6710000	59	59_1627	2	3	2	3	2	10982	3	2	3	10531	14247	2	3	11279	16726	2	3	13343	13610	14169	17034	12032	10268	11966	12347	17321	12957	9108	10063	2	13934	16409	13879	10100	10381	14188	13423	14423	12362
1952	1671	6783333	59	59_1671	145430	114923	146154	21820	12499	10725	476851	485851	690158	16067	22912	12591	292911	23978	55417	299928	255302	25461	41083	37548	45738	14077	12510	21135	31464	67740	29545	6530	218537	176254	36858	31692	34938	7529	19719	25465	45539	78695	23833
1953	1705	6840000	59	59_1705	3	2	3	2	3	2	3	2	3	2	3	11124	2	3	2	3	6529	10545	4610	2	4035	3	6759	5707	2	10794	19524	15303	3	2	35455	21668	29402	8690	3	2	3	25960	35539
1954	1741	6900000	59	59_1741	32399	36994	77135	18443	42345	47434	56462	48109	19248	13767	66122	43414	36224	29389	47306	74800	74383	2	43052	33265	45024	55730	33743	39921	55643	56437	50878	12864	63164	61057	66696	65127	82026	40642	34475	38158	68983	70665	44692
1955	1778	6961667	59	59_1778	23927	22326	23701	1233	1976	796	885	1038	9747	705	14983	1653	3	15743	2325	4379	2	21615	26063	1803	3830	26606	22112	29335	21110	52053	60302	40807	22387	29855	55382	70072	96151	29549	36096	62205	71876	73608	102869
1956	1816	7025000	59	59_1816	3	2	3	2	3	2	3	2	3	2	3	2	3	2	3	2	3	1725	2	3	2	3	2	3	2	3	2	3	2	3	4499	4257	2	3	830	2050	2517	3982	2
1957	1816	7025000	59	59_1816	3623	4578	5142	3	2	3	2	3	2	3	2	3	2	1029	3	2	3	2	3	2	3	1552	766	1330	1051	2648	3791	3092	2044	2721	5120	3743	5009	2	2839	3797	3095	3634	5349
1958	1881	7133333	59	59_1881	14146	13969	13465	4031	5014	5090	8157	8649	11239	5026	3997	4391	11138	3443	3	8881	9490	3966	2	6775	5436	3853	3	2	3709	8446	7502	4369	126565	32271	10666	13969	9591	3	4746	6516	8003	9179	9187
1959	1935	7223333	59	59_1935	2	2707	3	2736	2746	2	3	2	3	4322	1654	2	3	2	15731	10923	10305	3	2	3	15934	2	3	2	7630	3	2	3	2	1966	3	19257	2	3	2	4183	3	11588	2
1960	1966	7275000	59	59_1966	3	33660	36938	2	22975	30640	3	2	3	23363	16004	12174	62526	19164	33472	50194	44034	19158	17871	32942	38458	7160	10066	10251	23658	67525	45360	6229	2	3	2	52799	35699	4817	8904	6806	26265	29907	18711
1961	1994	7321667	59	59_1994	104255	79002	93092	32640	30660	20205	441279	433949	662522	40701	32051	31568	229424	40751	114985	227453	218215	46362	61813	68263	154043	29631	26140	35849	41849	90380	64486	32532	155323	96984	43164	61051	58350	18894	30119	30229	40312	74511	46008
1962	2013	7353333	59	59_2013	3	2	184	40152	1531	554	3	1975	2	3	1111	1007	2	3	2	3	996	2	1477	248	1517	976	707	1093	3	2	1182	3	1648	1167	2	737	3	2	627	3	2	435	3
1963	2153	7586667	59	59_2153	333199	181936	221307	577071	511834	562217	347748	330920	496580	573703	396662	331846	133833	40847	138411	137565	167057	30965	68243	41665	69528	30013	61569	102810	64845	67758	52775	26175	528856	512716	146849	57060	96640	32656	59707	35977	128571	100940	53365
1964	2153	7586667	59	59_2153	2	3	2	3	2	3	2	154793	204288	3	2	3	164259	23274	56577	173343	141830	23686	30415	42511	52708	2	17894	20948	32584	64411	37576	13795	3	2	48373	40012	40753	12011	21955	3	2	60962	34514
1965	2201	7666667	59	59_2201	355591	316930	355860	198380	3	2	819634	796581	1102489	85182	3	2	711742	72307	297442	723254	667844	68963	88601	95325	93270	78506	73556	85708	82222	109205	82225	66438	380854	3	77419	79812	83437	70128	73582	87905	78170	101757	81111
1966	2277	7793334	59	59_2277	43646	41190	45059	11344	13222	15023	49894	15268	60174	27352	7890	9372	58085	10412	74701	66967	60088	23218	9512	64338	74235	8340	20023	21954	2	85803	61878	21316	7447	9279	65506	75301	71185	16942	8469	7306	68292	71027	67914
1967	2328	7878334	59	59_2328	25849	24403	20994	20980	26930	28788	39190	39390	41250	21203	19449	19145	35864	18934	41184	37670	38608	15925	16302	39968	35589	17674	18412	18264	27126	37307	27635	11106	15782	14687	26019	30165	26924	19412	17155	17236	25358	34602	25971
1968	2365	7940000	59	59_2365	79386	76046	69525	97098	70849	61410	103063	90009	109193	78821	71746	73811	85094	63042	104557	101603	111230	67314	88872	82310	90947	72888	66663	84351	102057	99092	84490	88815	73881	71442	76079	82641	100938	69462	60670	102252	67217	94290	81798
1969	2408	8011666	59	59_2408	3	1589	791	1229	1016	1785	2	3	2	888	1729	2015	3	2	1681	3	2	3	1748	2	3	2	595	1647	3	2	3	2	1031	1027	3	371	2165	2	3	2	3	2	3
1970	2455	8090000	59	59_2455	2	2902	3778	3	2	3	2	3	2	3	3429	2	3	2405	2	3	2	1746	2548	3	2	3	2	3	2	3	1716	2	3	2	3	2	3	2	1804	2458	3	2	3
1971	2498	8161667	59	59_2498	52962	60216	72519	18970	18072	11918	267396	211721	173147	9474	2	6104	59227	10086	3	105929	72031	13505	2	14254	3	6226	5495	6687	4996	9888	2	2893	149640	61323	4352	6034	4804	2986	3	2	3	2	4048
1972	2552	8251667	59	59_2552	3159	2377	2275	1201	1035	1044	3	3014	2	1303	3	1129	3905	833	5849	3705	3040	1467	1265	2	6501	971	1175	1118	1817	6162	5800	2238	1448	1639	3939	6144	4880	1180	1846	1226	4390	4424	4296
1973	2599	8330000	59	59_2599	32494	26448	29369	14473	3	2	48798	51035	74387	15116	3	13694	58403	2	59366	48775	47006	12017	3	45316	57929	13158	2	3	16801	62135	42547	14460	17269	8073	35693	52454	45495	15082	14577	1952	35902	41782	42187
1974	2639	8396667	59	59_2639	99607	56865	68549	2	3	13969	302963	301177	499850	2	3	2	280085	12738	27505	243890	213530	3	2	14923	3	2	3	2	3	2	3	2	86666	3	33482	2	42234	23934	3	2	37035	3	2
1975	2683	8470000	59	59_2683	3	2	3	16846	13517	2	3	2	3	17758	13503	2	3	2	3	2	3	12411	15867	2	16578	3	12352	13210	17220	16464	12876	16757	2	13002	3	16094	2	3	2	15487	3	14518	12608
1976	2760	8598333	59	59_2760	24505	20394	19242	27186	21243	12700	29257	25077	35805	20841	18935	21343	40184	11225	50097	34190	30004	9536	21262	33477	44409	15298	10689	16894	16211	48819	27193	12856	23011	24218	23017	39105	29328	11258	13088	16177	22293	29357	28333
1977	2783	8636666	59	59_2783	2	372	3	2	3	2	3	2	3	2	3	2	3	2	3	2	3	2	3	2	3	2	287	3	2	3	2	3	2	3	2	3	2	3	2	2434	329	3	1368
1978	2840	8731667	59	59_2840	18357	14652	15060	17402	11566	12191	23634	20722	32752	14123	12845	13526	58786	6845	64635	47862	45140	6065	14884	34758	45040	9547	9490	10386	11858	15259	9753	9240	12613	13906	8791	14875	11541	8549	10674	16498	8094	16033	11726
1979	2887	8810000	59	59_2887	2	3	2	628	582	723	3	2	3	2	3	2	3	2	3	2	3	2	197	3	2	297	3	2	3	2	3	2	288	3	2	3	2	3	189	2	237	3	2
1980	2973	8953333	59	59_2973	4046	3	3783	4267	2	3592	3	2	3	3998	2766	3043	2	3348	3	2	3	2	2940	4214	3578	2646	2435	3	3873	2905	3163	3971	2	3	3685	3455	3419	2608	3169	4672	5886	3858	4479
1981	2941	8900000	59	59_2941	8390	4110	4615	14435	12012	13159	5592	4075	6894	15306	4724	4167	6468	7824	7713	5548	5142	6844	3512	6641	6960	3827	8038	3436	3190	7546	6055	15608	7409	5245	5371	7157	6264	6359	9943	5238	3920	6160	6388
1982	3010	9015000	59	59_3010	8879	6636	4630	10244	7798	9618	17213	14604	24630	13129	8017	8666	23689	6303	12259	15209	12972	7026	9299	16468	12423	8793	8443	8939	8770	6070	5978	11476	6536	7775	6615	7602	6187	8624	13725	14521	6573	7690	6872
1983	3073	9120000	59	59_3073	2	3	2	4260	4152	2777	3	2	3	3814	3698	2770	2	2871	3	2	3	2	4934	2078	3	2593	2543	2126	2	723	1205	1980	4724	3818	3	2	727	886	1925	3	2	3	2
1984	3092	9151667	59	59_3092	4009	2537	3894	2896	3269	2240	24330	21043	24087	2163	3226	2856	8596	4636	4433	9776	11397	3633	4885	4722	2680	2880	2652	2533	2612	3252	2842	1544	4619	4439	562	976	3147	1557	2283	1608	1306	2816	2959
1985	3123	9203333	59	59_3123	3459	2835	3	2	3	2	6986	5218	6466	3	2	3	5302	2	5118	4978	4187	5016	3	2	5056	3	2	3	907	2	3	2	3	2	3042	3864	3	2	3	2	3496	1016	1583
1986	3229	9380000	59	59_3229	12875	10818	10206	7295	4513	4048	15648	12295	24647	8170	5903	5147	16121	5564	18380	12970	11213	7749	8043	14008	19492	6526	5747	6565	5671	21077	16192	6235	8881	3	7184	19532	17742	4941	6873	7004	7669	15370	17932
1987	3269	9446667	59	59_3269	18028	16949	16191	14489	14944	2	3	2	13262	20550	19018	16166	13302	16345	25523	12147	10970	16063	26021	20744	28826	20815	24244	20444	8326	32646	25499	21137	18442	6044	17231	31652	28078	15797	29997	3935	20292	24564	28565
1988	3318	9528334	59	59_3318	7257	4824	4494	6751	4791	15777	31015	32064	62930	9239	3275	3684	18115	3849	6358	9363	9097	3124	4363	6599	6186	2216	2957	3340	5578	8062	3792	2401	5683	3957	5176	5648	3535	2698	4154	3484	4593	5584	5926
1989	3364	9605000	59	59_3364	104281	81950	81156	183011	105709	135560	196260	157690	266271	203915	120675	133120	251439	25865	261526	177518	185378	9231	57812	150664	220921	13217	27747	22907	91556	178821	27811	10380	75957	77004	44127	113042	29812	13940	22374	40180	22753	105127	22105
1990	3413	9686666	59	59_3413	24034	18346	18350	8348	6209	7544	11040	7406	23511	9430	6038	6742	23326	3968	25139	14055	18152	4576	5294	20681	28348	4308	4403	4258	9928	24929	17444	3	6311	4733	2	22154	14278	2832	5284	3536	15343	14534	3
1991	3587	9976666	59	59_3587	17318	15547	14847	22192	6614	5492	1502	2733	3693	10852	3313	10194	1979	12754	5322	2	1943	10468	4154	3385	5034	2477	2936	2618	17173	74229	4102	3339	9104	9961	43911	7529	4148	2155	3140	3304	49890	51033	44008
1992	3628	10045000	59	59_3628	4236	2261	3	2	4956	6534	3	1002	2167	5707	2	3	2	3	2	1535	3	2	3	2	3	2	3	2	3	2	3	2	4361	5643	3	2	3	2	3	2	3	2	3
1993	3680	10131667	59	59_3680	2	3	2	3	2	3	2	3	648	2	3	2	3	2	3	2	3	2	3	2	3	2	3	2	3	2	3	2	3	2	3	2	579	3	2	3	419	412	573
1994	3721	10200000	59	59_3721	5334	3127	4091	2	1393	1608	3225	2917	6617	1801	1773	2042	6584	1668	7363	3640	3470	4291	2329	5291	6868	1803	2112	1833	3491	9035	4853	1916	516	3	4793	7606	4547	1469	2523	3090	5377	5221	6281
1995	3770	10281667	59	59_3770	3602	2	3	2	3	2	3	4802	13723	2	3	2	3	225	2	3	2	3	2	3	2	302	3	492	2	1045	978	3	2	777	1327	3	493	2	3	1628	1797	576	1296
1996	3811	10350000	59	59_3811	2	1635	1694	3345	1440	3564	5275	3	28472	2	682	700	18814	3	18730	11047	12582	2	1292	12277	15254	414	768	3	2	3	2	3	256	876	2	2646	3	2	3	6694	2	3	2
1997	3810	10348333	59	59_3810	16535	12874	12457	71302	45603	48148	86138	82969	148173	98021	41292	46316	31605	30883	78088	24059	20486	47129	59727	31598	40143	37961	41850	33054	9763	43269	28659	63413	17650	17868	25911	42884	28479	35075	36715	917	29035	26822	30714
1998	3886	10475000	59	59_3886	3523	1476	1761	3	1363	1626	4735	3866	8354	1950	782	2	5181	696	3	4244	3438	1758	1138	5106	5407	2	950	3	2	3	3413	1538	1136	1232	4636	2	3471	3	602	2	3	2	3
1999	3931	10550000	59	59_3931	19166	9115	9824	8381	7930	8212	18823	17348	28126	11455	5349	5368	23355	9746	20131	20227	18134	6216	7719	20647	20893	5256	11832	7160	6453	13767	16103	14068	9396	7793	11606	11734	13960	7983	14592	13022	10282	7531	12523
[truncated: 31,495 more rows]
