# Supplementary material for: Non-targeted metabolomics unravels a media-dependent prodiginines production pathway in Streptomyces coelicolor A3(2)
Source: PLoS One. 2018 Nov 28;13(11):e0207541. doi: 10.1371/journal.pone.0207541 (PMC6261592; doi:10.1371/journal.pone.0207541)
Supplement: S2 File — The UPLC-Q-TOF-MS data sets were converted to the Net CDF format using MassLynx DataBridge (version 4.1, USA, Waters Corp.). Converted CDF data were preprocessed with the MetAlign software package (http://www.metalign.nl) for peak detection, retention time correction, and alignment. The resulting data, including sample names and peak area information as variables, were exported to an Excel file. (XLSX) [file pone.0207541.s009.xlsx]

## Sheet: raw file
Peak Nr	Scan Nr	Ret(umin)	Mass(uD)	Mass_Scan	Qc1	Qc2	Qc3	W2a	W2b	W2c	W2d	W2e	W2f	W3a	W3b	W3c	W3d	W3e	W3f	W4a	W4b	W4c	W4d	W4e	W4f	W5a	W5b	W5c	W5d	W5e	W5f	W6a	W6b	W6c	W6d	W6e	W6f	W7a	W7b	W7c	W7d	W7e	W7f
1	1574	12623550	100021515	100021515_1574	1	1	2	1	1	1	3	1	1	1	1	1	3	1	1	1	1	1	4	1	1	1	2	1	1	1	1	1	3	1	1	1	1	1	2	3	2	5	3
2	406	3259200	100033142	100033142_ 406	1	1	1	1	1	1	1	1	1	1	1	1	1	1	1	1	1	1	1	1	1	1	1	1	1	1	1	3	1	1	1	1	1	5	2	5	1	1	1
3	514	4128733	100034157	100034157_ 514	12	10	10	4	9	3	37	10	12	7	9	3	24	12	1	1	1	1	21	11	25	2	1	13	1	11	1	9	13	5	5	1	8	11	7	6	4	14	12
4	111	892383	100069656	100069656_ 111	3	1	1	1	1	1	7	1	4	1	1	1	8	1	4	1	1	1	3	1	7	1	1	1	1	1	6	1	1	1	1	1	4	1	1	1	2	3	6
5	1174	9419900	100068771	100068771_1174	8	7	7	1	1	1	1	1	1	1	1	1	1	1	1	1	1	1	1	1	1	39	1	1	1	1	1	1	1	1	1	1	1	1	1	1	1	1	1
6	1209	9698816	100070953	100070953_1209	6	8	8	1	1	1	1	1	1	1	1	1	1	1	1	1	1	1	1	1	1	39	1	1	1	1	1	1	1	1	1	1	1	1	1	1	1	1	1
7	1289	10333883	100070862	100070862_1289	46	49	41	5	1	1	3	2	13	1	1	1	1	1	1	3	1	1	4	1	1	52	1	1	1	1	1	1	9	1	8	1	1	1	1	3	1	1	1
8	1307	10482083	100070686	100070686_1307	1	1	3	1	1	1	1	1	6	1	1	1	1	1	1	1	1	1	1	1	1	34	1	1	1	1	1	1	7	1	1	1	1	1	1	1	1	1	1
9	145	1163900	100070274	100070274_ 145	1	1	1	1	1	1	7	1	1	1	1	1	6	1	1	1	1	1	1	1	1	1	1	1	1	1	5	1	1	1	1	1	4	1	1	1	2	1	5
10	472	3786350	100070992	100070992_ 472	1	1	1	1	1	1	1	1	1	1	1	1	1	1	1	1	1	1	1	1	1	1	1	3	1	1	1	2	1	4	1	1	1	6	1	4	1	1	1
11	624	5004233	100070290	100070290_ 624	1	1	1	1	1	1	3	1	3	1	4	1	1	1	1	4	7	4	1	1	1	3	8	7	1	1	1	2	8	3	1	1	1	4	6	4	1	1	1
12	1382	11088183	100071030	100071030_1382	3	1	1	6	1	1	1	4	9	1	1	1	1	1	1	1	1	1	1	1	1	1	1	1	1	1	1	1	9	1	5	1	1	1	1	1	7	1	1
13	1471	11802100	100071388	100071388_1471	6	1	1	3	1	1	5	3	2	1	3	1	5	1	3	1	1	1	1	6	3	1	1	1	1	1	1	2	1	1	4	1	1	1	1	4	4	1	3
14	1601	12840917	100952034	100952034_1601	6	6	2	6	6	6	6	17	9	12	9	7	3	3	6	1	15	1	5	4	20	18	4	11	11	9	13	15	10	15	1	1	5	5	5	11	11	11	1
15	1582	12685117	100952843	100952843_1582	9	12	9	22	23	19	19	16	21	20	17	18	18	20	20	1	22	19	19	18	19	22	17	19	19	15	18	17	14	11	14	1	16	8	17	16	15	17	13
16	1022	8202000	100960434	100960434_1022	1	1	1	1	1	1	2	1	1	1	1	1	1	1	2	1	2	1	1	1	1	1	1	1	1	1	1	1	1	1	1	1	1	1	1	1	1	1	1
17	1574	12623550	100964142	100964142_1574	1	3	1	2	1	1	1	1	2	5	1	1	1	1	10	1	1	1	1	1	1	1	1	1	1	1	1	1	1	1	1	1	1	1	1	1	3	1	1
18	1139	9131200	101056335	101056335_1139	7	5	1	1	1	1	1	1	1	2	1	3	5	5	4	1	1	1	1	1	1	1	1	1	1	1	1	1	1	1	1	1	1	1	1	1	1	2	1
19	1273	10210767	101055649	101055649_1273	1	9	12	1	1	1	1	1	1	1	4	3	1	3	1	1	1	1	1	1	1	1	1	1	1	1	1	1	1	1	1	1	1	1	1	1	1	3	1
20	1548	12413883	101066628	101066628_1548	1	1	1	3	4	1	1	1	2	1	1	1	1	1	1	1	1	1	1	1	1	1	1	1	1	1	1	1	1	1	1	1	1	1	1	1	1	1	1
21	1162	9317866	101087585	101087585_1162	8	9	9	1	1	1	1	1	1	1	1	1	1	4	1	1	1	1	1	1	1	1	1	1	1	1	1	1	1	1	1	1	1	1	1	1	1	1	1
22	1578	12654333	101946144	101946144_1578	6	5	4	4	1	1	4	1	1	1	1	1	4	2	3	2	1	4	3	1	5	4	1	2	6	1	3	4	6	1	6	4	5	3	7	1	4	1	3
23	1581	12677417	101955612	101955612_1581	1	1	2	1	4	1	1	1	1	2	1	1	1	1	1	1	1	1	1	1	1	1	1	3	1	1	1	1	1	1	1	1	1	1	1	1	1	1	1
24	9	78633	102009163	102009163_ 9	1	1	1	1	1	1	1	1	1	1	1	1	1	2	1	1	1	1	1	2	1	1	1	1	1	1	2	1	1	1	1	1	1	1	1	1	1	1	1
25	355	2847383	102008446	102008446_ 355	1	1	1	1	1	2	1	1	2	1	1	1	1	1	1	1	1	1	1	1	1	1	1	1	1	1	1	1	1	2	1	1	1	1	1	1	1	2	1
26	528	4236450	102008888	102008888_ 528	1	1	1	1	2	1	1	1	1	1	1	1	1	1	1	1	1	1	1	1	1	1	1	1	2	1	1	1	1	1	1	1	1	1	3	1	1	2	1
27	1655	13275717	102007553	102007553_1655	1	2	1	1	1	1	2	1	1	1	1	1	1	1	1	1	1	1	1	1	1	2	1	1	1	1	2	3	1	2	1	1	1	1	1	1	1	1	1
28	613	4919500	102012421	102012421_ 613	1	1	1	1	1	1	1	1	1	1	1	1	1	1	1	1	1	1	1	2	1	1	1	1	1	1	1	2	1	1	1	1	1	1	1	2	1	1	1
29	691	5548584	102012802	102012802_ 691	1	2	1	1	1	1	1	1	1	1	1	1	1	1	1	1	1	1	1	1	1	2	1	1	2	1	1	1	1	2	1	1	1	1	1	1	1	1	2
30	1586	12715900	102026176	102026176_1586	1	2	1	1	1	1	2	1	3	2	1	1	1	1	1	1	1	1	1	1	1	1	1	2	1	1	2	1	1	1	1	1	1	2	2	1	1	1	2
31	107	861617	102085312	102085312_ 107	3	1	3	1	1	1	1	1	1	1	1	1	3	3	5	1	4	1	1	7	1	3	1	1	1	8	4	1	4	1	4	5	3	3	1	3	1	1	6
32	361	2903150	102086403	102086403_ 361	3	1	4	1	1	1	4	3	1	1	1	2	5	8	5	2	3	1	1	4	1	3	1	2	1	5	3	3	3	1	1	2	1	1	1	1	1	7	5
33	420	3367017	102085724	102085724_ 420	9	8	9	1	2	2	6	5	5	5	16	3	12	12	9	5	6	5	12	8	8	8	1	10	3	9	3	6	10	7	8	9	4	10	8	5	1	12	11
34	479	3840217	102086700	102086700_ 479	1	1	4	1	1	7	5	1	1	4	16	8	1	1	4	4	4	3	4	2	4	3	1	6	1	1	1	3	6	3	1	1	1	1	1	1	1	1	3
35	1035	8302033	102086220	102086220_1035	1	1	1	1	1	1	1	1	1	1	4	1	1	1	2	1	1	1	1	1	1	1	1	2	1	1	1	1	1	1	1	1	1	1	1	1	1	1	1
36	1429	11459617	102115601	102115601_1429	1	1	1	1	1	1	1	1	1	1	1	1	1	1	1	7	1	1	2	2	1	1	1	1	1	1	1	1	1	1	1	1	1	1	1	1	1	1	1
37	1489	11940700	102122391	102122391_1489	9	8	10	51	6	2	6	4	3	7	3	9	7	6	10	9	2	11	7	13	7	3	9	8	3	7	6	9	3	10	6	9	13	11	1	1	7	14	8
38	1309	10497467	102124619	102124619_1309	1	1	1	18	1	1	1	1	1	1	1	1	1	1	1	1	1	2	1	1	1	1	1	1	1	1	1	1	1	1	1	2	1	1	1	1	1	1	1
39	1509	12104200	102123528	102123528_1509	13	11	13	70	11	10	14	12	17	13	12	20	20	18	18	10	10	10	6	8	6	6	6	10	6	7	6	11	12	8	11	11	6	8	8	10	12	13	13
40	1533	12298467	102123207	102123207_1533	15	10	15	64	10	9	8	9	10	10	3	14	10	5	13	16	7	12	8	13	11	7	6	8	10	8	10	15	9	11	15	17	9	12	13	1	8	13	9
41	1386	11118950	102124725	102124725_1386	5	2	1	38	1	3	1	1	2	1	3	1	1	1	12	5	3	4	1	1	1	2	3	1	1	3	2	1	1	1	3	6	1	1	3	1	3	4	1
42	1538	12336950	102127945	102127945_1538	1	1	1	1	1	1	1	1	1	1	1	1	1	2	1	12	1	1	1	1	1	5	1	1	1	1	1	1	1	1	1	1	1	1	1	1	1	1	1
43	1580	12669717	102949692	102949692_1580	1	1	1	4	3	1	1	1	1	1	1	1	1	1	1	1	1	2	1	1	1	1	1	1	1	2	1	1	1	3	1	2	1	1	2	1	1	1	1
44	411	3297667	103049110	103049110_ 411	13	10	11	9	1	4	26	13	17	9	11	5	23	1	19	11	7	8	20	20	26	7	10	15	7	16	1	11	12	1	1	19	18	1	5	1	1	20	18
45	1338	10730217	103952591	103952591_1338	2	2	1	1	5	8	5	9	5	1	2	3	5	1	3	1	5	1	1	1	4	2	1	1	1	3	1	1	3	4	1	1	1	1	2	4	2	1	1
46	1408	11288250	103952347	103952347_1408	7	5	3	1	9	11	12	13	9	8	7	4	7	1	8	6	5	1	1	6	5	3	1	2	1	6	1	2	4	5	4	1	5	3	4	5	2	5	6
47	1483	11894433	103952034	103952034_1483	3	3	1	1	1	6	7	10	6	1	2	4	4	3	5	3	3	1	1	1	3	3	1	1	1	3	1	3	2	1	1	1	1	1	3	4	1	3	1
48	1534	12306167	103952194	103952194_1534	13	10	6	28	26	30	28	24	23	13	4	19	25	24	21	17	13	1	22	19	27	15	14	1	17	20	16	17	10	4	16	1	16	11	14	13	11	15	13
49	1501	12042633	103952835	103952835_1501	4	8	1	1	12	8	5	10	6	7	4	6	5	4	8	5	1	1	1	3	9	18	1	1	14	1	1	17	10	1	17	1	1	1	6	4	1	1	1
50	1587	12723583	103952225	103952225_1587	1	5	1	1	1	8	9	5	4	1	2	4	4	1	7	1	1	1	1	1	2	3	1	1	4	1	1	1	1	1	5	1	1	1	10	2	1	1	1
51	1359	10901500	103956078	103956078_1359	1	3	1	1	1	1	5	1	1	1	1	1	1	1	1	1	1	1	1	1	2	1	1	1	1	2	1	1	1	2	1	1	1	1	1	2	1	1	1
52	1503	12058017	103962318	103962318_1503	1	3	1	1	1	1	1	1	6	1	4	1	1	1	1	3	1	1	1	1	1	1	1	1	1	4	2	1	1	2	1	1	1	1	1	2	1	1	1
53	746	5981500	105025940	105025940_ 746	1	1	1	1	1	1	1	1	1	1	1	1	1	1	1	1	1	1	1	1	1	1	1	1	1	1	1	1	1	1	1	8	1	1	1	1	7	1	3
54	348	2793517	105066673	105066673_ 348	2	3	4	1	1	1	1	1	1	1	1	1	1	1	1	1	1	1	1	1	1	1	1	1	1	1	1	1	1	1	9	1	1	1	1	1	14	1	1
55	520	4174900	105064819	105064819_ 520	1	1	1	1	1	1	4	1	1	1	1	1	1	1	1	1	1	2	1	1	4	1	1	1	1	1	3	1	1	1	3	1	3	1	1	1	1	1	2
56	564	4523167	105065643	105065643_ 564	41	40	32	18	25	15	39	33	25	25	46	19	38	23	21	40	26	34	36	24	33	22	33	43	6	27	34	30	39	23	13	39	13	33	21	23	20	32	20
57	598	4794483	105064331	105064331_ 598	1	1	1	1	1	1	2	1	1	1	2	1	1	1	1	1	1	3	1	1	1	1	1	1	1	1	1	1	1	1	1	1	1	1	1	1	4	3	1
58	840	6733800	105065277	105065277_ 840	248	243	234	188	290	196	255	157	159	185	255	262	340	222	238	231	210	180	200	185	199	252	249	279	78	237	164	206	276	170	171	161	110	220	149	171	144	220	142
59	895	7176400	105065727	105065727_ 895	5	1	1	12	17	12	18	6	1	1	9	2	1	11	12	4	1	4	10	1	1	4	3	1	1	1	1	3	4	1	1	1	1	1	2	4	1	1	1
60	945	7580433	105064453	105064453_ 945	7	1	1	2	5	1	2	1	1	1	5	1	1	3	1	2	1	1	1	4	1	1	5	1	1	4	1	1	6	1	1	2	1	1	1	1	3	1	1
61	1049	8409766	105063309	105063309_1049	1	4	1	3	1	1	1	1	2	1	1	1	1	1	1	1	1	3	3	1	1	1	2	1	1	1	1	1	1	1	1	2	1	1	1	1	2	1	1
62	1117	8961900	105065132	105065132_1117	2	3	1	1	1	1	3	1	2	1	1	1	6	3	1	1	1	1	3	3	1	1	1	1	1	2	1	1	1	1	1	3	1	1	1	1	1	5	1
63	1185	9504534	105065323	105065323_1185	12	8	7	12	6	10	18	8	6	12	14	14	17	1	13	12	8	1	21	1	18	38	15	14	4	15	10	10	16	10	9	13	8	11	9	13	14	7	11
64	1334	10699433	105066963	105066963_1334	1	1	1	2	1	1	1	1	12	1	1	1	1	1	1	1	1	1	1	1	1	1	1	1	1	1	1	1	12	1	2	1	1	1	1	1	4	1	1
65	682	5469733	105066360	105066360_ 682	3	3	5	1	1	1	1	1	1	4	4	1	1	1	1	4	5	6	4	1	1	6	6	7	1	1	1	6	5	1	1	1	1	5	6	6	2	3	1
66	792	6354650	105066734	105066734_ 792	3	4	2	4	3	1	2	1	1	1	3	2	3	1	1	3	1	4	2	1	1	4	1	4	1	1	1	1	1	1	1	1	1	4	1	1	6	1	1
67	799	6408517	105066795	105066795_ 799	3	1	1	4	3	1	1	1	1	1	1	1	5	1	1	2	1	2	1	1	1	1	1	2	1	1	1	1	1	1	1	1	1	2	1	1	1	1	1
68	1324	10622500	105067772	105067772_1324	1	1	1	3	1	1	1	1	17	1	1	1	1	1	1	2	1	1	1	1	1	1	1	1	1	1	1	1	15	1	2	1	1	1	1	1	3	1	1
69	1394	11180516	105067406	105067406_1394	1	1	1	2	1	1	1	1	3	1	1	1	1	1	1	1	1	1	1	1	1	1	1	1	1	1	1	1	6	1	4	1	1	1	1	1	2	1	1
70	870	6974333	105070435	105070435_ 870	2	3	1	1	1	1	1	1	1	1	1	1	1	1	1	1	1	1	1	1	1	1	1	1	1	1	1	1	1	1	1	1	1	1	1	1	1	1	2
71	1001	8030717	105072800	105072800_1001	1	1	1	1	1	1	1	1	1	1	1	1	1	1	1	1	1	2	1	1	2	1	3	1	1	1	1	1	1	1	1	3	1	1	1	1	1	1	1
72	1362	10924583	105950287	105950287_1362	1	1	1	4	5	1	3	1	1	2	2	1	4	3	1	1	1	1	1	1	2	1	1	1	1	1	1	1	1	3	1	1	2	1	1	1	1	2	1
73	1397	11203600	105950371	105950371_1397	2	4	1	9	5	2	3	3	3	3	3	2	3	6	1	2	2	1	1	2	3	2	2	3	2	1	2	2	3	2	3	1	3	2	1	3	2	5	2
74	1436	11513483	105950592	105950592_1436	2	2	1	6	3	3	4	3	3	2	2	2	5	4	1	1	3	1	1	2	2	2	2	3	2	1	1	1	1	3	1	1	5	2	1	2	3	2	2
75	1531	12283083	105951019	105951019_1531	1	1	1	6	13	1	3	1	7	5	3	10	3	7	3	2	1	1	8	6	5	5	5	5	1	1	2	1	5	6	5	1	2	7	1	2	1	5	5
76	1529	12258100	105951561	105951561_1529	5	3	1	14	8	11	12	11	9	5	2	10	11	11	8	7	1	1	15	10	10	10	7	7	7	1	10	6	9	6	5	1	7	6	5	7	3	5	6
77	1380	11063200	105954926	105954926_1380	1	1	1	1	1	1	1	1	1	1	1	1	3	3	1	1	1	1	1	1	1	1	1	1	1	1	1	1	1	1	1	1	1	1	1	1	1	1	2
78	1543	12375417	105963211	105963211_1543	1	1	1	1	6	3	1	1	1	1	1	1	2	3	1	1	1	1	1	1	1	1	1	1	1	1	1	1	2	1	1	1	8	1	1	2	1	1	2
79	566	4538550	106068489	106068489_ 566	1	1	1	1	1	1	4	4	1	1	3	1	4	1	1	1	1	2	1	1	1	1	1	6	1	1	1	1	1	1	1	3	1	3	2	2	1	1	1
80	840	6733800	106069542	106069542_ 840	21	21	18	1	30	15	21	14	14	16	24	23	26	16	20	19	19	15	13	14	17	21	20	26	1	21	10	20	26	13	16	14	10	17	7	15	13	18	12
81	1189	9535316	106068626	106068626_1189	1	1	1	1	1	1	1	1	1	1	1	1	1	1	1	1	1	1	3	1	1	3	1	1	1	1	1	1	1	1	1	2	1	1	1	1	1	1	1
82	1556	12475450	106947632	106947632_1556	19	17	15	12	18	11	13	14	18	9	13	12	15	17	19	10	14	1	17	19	15	14	6	15	1	19	14	14	13	16	16	15	15	14	17	17	13	19	14
83	519	4167200	106995209	106995209_ 519	2	1	2	1	1	1	2	1	1	1	1	1	5	1	1	1	1	1	1	1	3	2	1	1	1	5	3	1	1	1	2	1	4	4	1	1	6	7	8
84	570	4569334	106993294	106993294_ 570	1	1	1	1	1	1	1	1	1	1	1	1	1	1	2	1	1	1	1	1	1	1	1	1	1	1	2	1	1	1	1	1	1	1	1	1	1	1	2
85	524	4205683	107000298	107000298_ 524	1	1	1	1	1	1	1	1	1	1	1	1	1	1	1	1	1	1	1	1	1	1	1	1	1	1	1	1	1	1	1	1	1	1	1	1	2	3	3
86	264	2118167	107042938	107042938_ 264	9	8	10	1	1	1	1	1	1	1	1	1	1	1	1	1	1	1	1	1	1	1	1	1	1	1	1	1	1	1	1	1	1	1	1	1	1	1	1
87	367	2949317	107043175	107043175_ 367	1	1	1	1	1	1	8	4	1	2	1	1	4	1	1	1	1	1	1	1	1	1	1	1	1	1	1	1	1	1	1	2	1	1	2	1	1	1	1
88	388	3111000	107043991	107043991_ 388	10	11	5	3	1	1	12	7	8	8	7	5	11	10	9	6	7	7	5	4	14	6	4	8	4	5	8	7	9	5	8	9	6	5	5	6	9	7	7
89	396	3182150	107044716	107044716_ 396	69	63	68	6	8	1	122	57	85	11	15	8	211	139	154	39	19	22	208	158	235	47	39	46	92	184	137	81	70	27	171	195	141	88	42	27	221	207	185
90	430	3453567	107043388	107043388_ 430	6	5	4	1	1	1	8	5	2	1	4	3	9	5	5	5	2	2	1	2	7	1	1	1	3	3	1	2	1	1	5	8	3	5	1	1	3	7	7
91	744	5966100	107042198	107042198_ 744	1	1	1	1	1	1	1	1	1	1	1	1	4	2	1	1	1	1	1	1	5	1	1	1	1	1	1	1	1	1	1	1	1	1	1	1	1	1	1
92	225	1808467	107047760	107047760_ 225	3	2	6	1	1	1	1	1	1	1	1	1	1	1	1	1	1	1	1	1	1	1	1	1	1	1	1	1	1	1	1	1	1	1	1	1	1	1	1
93	686	5500517	107081062	107081062_ 686	5	5	3	1	4	1	1	1	1	1	1	1	1	1	1	5	1	1	1	1	1	5	4	6	1	1	1	7	4	1	1	1	1	6	3	7	1	1	3
94	758	6083433	107080917	107080917_ 758	1	4	2	1	7	6	1	1	1	9	12	4	1	1	1	8	1	8	1	1	1	3	4	1	1	1	1	1	1	1	1	1	1	1	1	2	2	1	1
95	896	7184083	107079590	107079590_ 896	5	6	6	1	1	1	1	1	2	1	1	1	1	1	1	2	1	1	1	1	1	1	1	4	1	1	1	2	1	1	1	2	1	1	1	1	3	1	3
96	981	7867133	107077950	107077950_ 981	4	4	2	1	1	1	1	1	1	1	1	1	1	1	1	1	1	1	1	1	1	1	1	1	1	1	1	1	1	1	1	1	1	1	1	1	1	1	1
97	1163	9325650	107080902	107080902_1163	15	18	16	1	1	1	1	1	1	1	1	1	1	1	1	1	1	1	1	1	1	15	1	1	1	1	1	1	1	1	1	1	1	1	1	1	1	1	1
98	1137	9115800	107082390	107082390_1137	36	37	37	1	1	1	1	1	1	9	9	14	22	20	14	1	1	1	1	1	1	43	1	1	1	1	1	1	3	1	1	1	1	1	1	1	2	1	1
99	1191	9550716	107082832	107082832_1191	2	4	1	1	1	1	1	1	1	1	1	1	1	1	1	1	1	1	1	1	1	6	1	1	1	1	1	1	1	1	1	1	1	1	1	1	1	1	1
100	1208	9691116	107080490	107080490_1208	10	19	13	1	1	1	1	1	1	1	1	1	3	6	1	1	1	1	1	1	1	59	2	1	1	1	1	1	4	1	1	1	1	1	1	1	1	1	1
101	1272	10203067	107081367	107081367_1272	49	44	61	1	4	3	1	4	9	13	26	33	16	14	14	6	2	2	1	3	4	56	5	3	1	1	1	5	45	1	8	3	1	1	1	1	2	1	4
102	834	6687634	107082283	107082283_ 834	1	1	3	1	5	5	1	1	1	5	1	1	1	1	1	5	2	5	1	1	1	1	1	10	1	1	1	6	8	1	1	1	1	3	3	5	1	1	1
103	1030	8263567	107081642	107081642_1030	2	1	1	1	1	1	1	1	1	1	1	1	1	1	1	1	2	1	1	1	1	1	1	2	1	1	1	1	1	1	1	1	1	1	1	1	1	1	1
104	1045	8378983	107083801	107083801_1045	12	10	8	1	1	1	1	1	1	1	1	1	1	1	1	1	3	1	1	1	1	1	3	7	1	1	1	1	1	1	1	1	1	1	5	6	1	1	1
105	1290	10341583	107082901	107082901_1290	39	55	45	1	1	1	1	2	47	2	6	1	1	1	6	1	2	1	1	1	1	1	1	4	1	1	1	1	30	1	4	1	1	1	1	1	7	1	1
106	1482	11886733	107084656	107084656_1482	2	1	1	1	3	1	4	5	3	4	1	3	3	1	1	4	1	1	1	1	1	1	1	1	1	4	1	1	1	1	1	1	1	1	1	1	1	1	4
107	1387	11126650	107086929	107086929_1387	1	1	1	1	1	1	1	5	2	1	1	1	1	1	1	1	1	1	1	1	1	1	1	1	1	1	1	1	10	1	4	1	1	1	1	1	5	1	1
108	1533	12298467	107963303	107963303_1533	1	1	1	4	1	8	1	1	3	1	1	1	1	3	1	1	2	1	1	1	2	1	1	1	3	1	1	3	2	1	1	4	3	1	1	2	1	1	1
109	1320	10582117	108039612	108039612_1320	1	1	1	1	1	1	1	1	4	1	1	1	1	1	1	1	1	1	1	1	1	1	1	1	1	1	1	1	7	1	1	1	1	1	1	1	2	1	1
110	109	877000	108041016	108041016_ 109	31	34	32	32	20	9	70	50	50	17	26	20	63	41	37	13	12	13	50	33	45	13	12	16	14	24	20	16	23	17	19	17	16	10	11	18	10	17	12
111	117	938567	108041489	108041489_ 117	8	1	8	3	1	1	4	1	1	1	1	1	1	1	1	1	1	1	1	1	1	1	1	1	1	1	1	1	1	1	1	1	1	1	1	1	1	1	1
112	638	5121567	108043892	108043892_ 638	1	1	1	1	1	1	1	1	1	1	1	4	1	1	1	10	8	8	1	1	1	5	9	16	1	1	1	11	13	8	1	1	1	7	5	8	1	3	1
113	701	5625533	108042839	108042839_ 701	1	1	1	1	1	1	1	1	1	4	3	1	2	1	1	8	2	7	1	1	1	4	6	9	1	3	1	9	7	6	4	2	1	1	1	6	4	4	1
114	399	3205233	108047318	108047318_ 399	1	3	1	1	1	1	6	4	6	1	1	1	17	1	1	1	1	1	16	11	19	1	1	1	9	13	9	1	1	1	13	1	12	5	1	1	16	17	15
115	555	4453917	108044289	108044289_ 555	1	1	5	1	1	1	1	1	1	4	1	3	1	1	1	11	10	14	1	1	1	11	9	13	1	1	1	15	16	12	1	4	1	11	8	11	1	1	3
116	1138	9123500	108083893	108083893_1138	3	1	1	1	1	1	1	1	1	1	1	2	1	1	1	1	1	1	1	1	1	3	1	1	1	1	1	1	1	1	1	1	1	1	1	1	1	1	1
117	1288	10326183	108087914	108087914_1288	1	1	5	1	1	1	1	1	5	1	1	1	1	1	1	1	1	1	1	1	1	1	1	1	1	1	1	1	3	1	1	1	1	1	1	1	1	1	1
118	1288	10326183	108087891	108087891_1288	4	1	5	1	1	1	1	1	1	1	1	1	1	1	1	1	1	1	1	1	1	5	1	1	1	1	1	1	5	1	1	1	1	1	1	1	1	1	1
119	1617	12964133	108957306	108957306_1617	1	1	1	2	1	1	2	1	1	1	2	1	1	1	3	1	1	1	2	1	1	1	1	2	1	1	1	1	1	1	1	1	1	2	1	1	1	1	1
120	108	869300	109048340	109048340_ 108	1	1	1	1	1	1	7	1	1	1	3	1	1	3	1	1	1	2	1	1	1	1	1	1	1	1	1	3	1	1	3	1	1	1	1	1	1	1	1
121	620	4973467	109060432	109060432_ 620	1	1	3	1	1	1	1	1	1	1	1	1	1	1	1	2	1	1	1	1	1	1	1	1	1	1	1	1	3	1	1	1	1	1	1	1	1	1	1
122	682	5469733	109061958	109061958_ 682	4	5	3	3	1	1	1	1	1	5	10	1	1	1	1	8	7	4	1	1	2	6	7	8	1	3	1	8	1	7	3	4	1	5	5	5	1	3	2
123	693	5563967	109059082	109059082_ 693	1	1	1	1	1	1	1	1	1	1	3	1	1	1	1	1	1	1	1	1	1	1	3	1	1	1	1	4	1	1	1	2	1	1	1	1	1	1	1
124	107	861617	109067383	109067383_ 107	1	1	3	1	1	1	1	1	1	1	1	1	1	1	1	1	1	1	1	2	1	1	1	1	1	1	1	1	1	1	1	2	1	3	1	1	1	1	1
125	792	6354650	109063400	109063400_ 792	1	1	1	1	1	1	1	1	1	1	2	1	1	1	1	1	2	1	1	1	1	1	1	1	1	1	1	1	2	1	1	1	1	1	1	1	1	1	2
126	1139	9131200	109069664	109069664_1139	1	1	1	1	1	2	1	1	1	1	1	1	1	1	1	1	2	1	1	1	1	1	1	1	1	1	1	1	1	1	1	2	1	1	1	1	1	1	1
127	1142	9163867	109085403	109085403_1142	1	1	1	1	1	1	1	1	1	10	1	1	1	1	1	1	1	1	1	4	1	1	1	1	1	1	1	1	1	1	1	1	1	1	1	1	3	1	1
128	1400	11226684	109086052	109086052_1400	1	1	1	2	1	1	1	1	1	1	1	1	1	1	1	3	1	2	1	1	1	1	1	10	1	1	1	1	1	1	1	1	1	1	1	1	1	1	1
129	454	3647833	109097733	109097733_ 454	1	1	2	2	1	1	1	1	1	4	9	4	1	1	1	1	4	6	1	1	1	4	5	13	1	1	1	8	9	5	1	2	2	4	3	4	1	3	1
130	505	4049883	109097542	109097542_ 505	1	1	3	3	1	1	1	1	1	1	4	4	1	1	1	6	5	10	1	1	1	1	1	12	1	1	1	6	8	4	1	1	1	3	1	2	1	1	3
131	626	5019633	109097664	109097664_ 626	1	18	20	19	17	12	1	1	1	30	47	20	4	2	1	31	27	24	10	4	1	24	22	29	1	6	1	26	40	23	1	6	4	15	14	13	7	5	1
132	638	5121567	109096001	109096001_ 638	1	2	1	1	4	1	1	1	1	1	1	1	1	1	1	1	4	3	1	1	1	4	1	7	1	2	1	1	4	5	1	1	1	4	1	1	1	1	1
133	689	5523600	109097404	109097404_ 689	6	7	6	2	4	3	1	1	1	5	5	3	1	1	1	12	7	9	3	1	3	11	10	15	1	1	1	18	13	8	2	2	4	24	11	14	2	7	5
134	709	5687100	109097183	109097183_ 709	1	1	1	2	2	1	1	1	1	1	1	1	1	1	1	2	1	1	1	1	1	2	1	6	1	1	1	6	1	4	1	1	1	7	3	1	1	1	2
135	754	6052650	109097633	109097633_ 754	4	1	3	6	9	5	1	1	1	7	5	7	1	1	1	9	3	8	1	1	1	4	8	9	1	1	1	6	9	4	1	1	1	6	4	4	1	1	1
136	770	6175766	109095963	109095963_ 770	1	1	1	1	5	1	1	1	1	1	1	1	1	1	1	2	1	5	1	1	1	1	1	1	1	1	1	1	1	1	1	1	1	1	1	1	1	1	1
137	810	6493250	109096878	109096878_ 810	7	1	7	10	26	11	1	4	6	7	11	4	6	3	1	7	5	7	1	3	1	6	1	1	1	1	1	5	1	5	1	2	1	1	3	5	1	1	1
138	822	6595284	109095848	109095848_ 822	1	1	1	1	4	1	1	3	1	1	7	5	1	1	1	2	1	7	1	1	1	1	1	1	1	1	1	1	1	1	1	1	1	1	1	1	1	1	1
139	895	7176400	109097557	109097557_ 895	8	6	1	2	1	1	1	1	1	1	1	1	1	1	1	2	2	5	1	1	1	1	1	1	1	1	1	2	1	1	1	1	1	1	1	2	1	1	1
140	960	7695950	109098755	109098755_ 960	1	1	1	1	1	1	1	1	1	2	2	1	1	1	1	5	1	3	1	1	1	5	1	1	1	1	1	9	5	1	1	1	2	7	1	3	1	1	1
141	1031	8271267	109100929	109100929_1031	1	1	1	1	1	1	1	1	1	1	1	1	1	1	1	3	1	2	1	1	1	2	1	1	1	1	1	1	1	1	1	1	1	1	1	1	1	1	1
142	1044	8371300	109097076	109097076_1044	19	12	16	2	2	1	2	1	1	1	2	1	1	2	1	2	1	5	1	3	1	5	1	5	1	1	1	1	1	1	2	1	1	1	1	3	1	1	1
143	1137	9115800	109098358	109098358_1137	41	40	43	2	2	1	1	1	1	1	1	1	1	1	1	2	1	2	1	1	1	18	1	1	1	1	1	1	1	1	1	1	1	1	1	1	1	1	1
144	1117	8961900	109097092	109097092_1117	10	1	1	2	1	1	1	1	1	1	1	1	1	1	1	2	1	2	1	1	1	11	1	1	1	1	1	1	1	1	1	1	1	1	1	1	1	1	1
145	1158	9287084	109093994	109093994_1158	1	1	1	3	1	1	1	1	1	1	1	1	1	1	1	2	1	2	1	1	1	3	1	1	1	1	1	1	1	1	1	1	1	1	1	1	1	1	1
146	1164	9333350	109097481	109097481_1164	58	57	70	2	2	1	1	1	1	3	9	15	25	27	16	3	1	3	1	1	1	48	1	1	1	1	1	1	1	1	2	1	1	1	1	1	2	1	1
147	1207	9683416	109096558	109096558_1207	38	38	43	7	2	2	1	1	10	2	1	1	19	20	11	3	1	2	2	3	1	144	1	1	1	5	1	1	12	4	9	4	2	1	1	1	4	2	1
148	1230	9860500	109098312	109098312_1230	1	9	1	6	1	1	1	1	3	1	1	1	1	1	2	2	2	2	1	1	1	1	1	1	1	1	1	1	18	1	1	1	1	1	1	1	1	1	1
149	1245	9985717	109098587	109098587_1245	1	1	1	5	1	1	1	1	1	1	1	1	1	1	2	3	1	3	1	2	1	1	1	1	1	1	1	1	6	1	1	1	1	1	1	1	1	1	1
150	1272	10203067	109098053	109098053_1272	72	69	74	3	2	3	1	8	18	3	8	9	7	1	10	4	11	10	1	2	1	36	1	1	1	3	1	1	49	1	3	4	3	1	1	1	10	1	2
151	1289	10333883	109098801	109098801_1289	75	91	76	17	10	7	7	9	37	16	40	44	24	19	22	13	6	8	7	2	7	103	1	6	5	4	1	7	40	1	24	6	5	1	1	1	15	7	7
152	1333	10691750	109096878	109096878_1333	1	3	1	12	1	3	3	4	50	3	1	1	4	1	7	5	1	4	1	3	1	1	1	1	1	1	1	1	62	1	13	4	3	1	1	1	18	1	1
153	1347	10799566	109098099	109098099_1347	1	1	1	3	1	1	1	1	1	2	1	1	2	1	1	3	1	1	1	1	1	1	1	1	1	1	1	1	11	1	1	3	2	1	1	1	1	1	1
154	1385	11111267	109096619	109096619_1385	1	5	1	19	1	1	1	8	1	2	1	1	6	1	1	4	1	3	1	1	1	10	1	1	1	1	1	1	26	1	21	7	4	1	1	1	14	1	1
155	1399	11219000	109098206	109098206_1399	8	12	12	20	12	3	15	13	28	12	17	16	27	2	13	14	12	14	1	9	10	9	11	15	1	10	1	6	39	5	30	4	6	1	8	1	27	1	1
156	1468	11769417	109097649	109097649_1468	12	9	8	14	12	2	14	12	15	10	13	16	16	3	19	11	6	6	5	12	7	10	6	7	1	13	6	2	8	7	11	5	7	1	6	11	13	6	11
157	1488	11932917	109096535	109096535_1488	1	1	1	1	1	1	1	8	3	1	1	1	1	1	1	4	1	3	1	1	1	1	1	1	1	1	1	1	1	1	1	2	2	1	1	1	1	1	1
158	1483	11894433	109098167	109098167_1483	5	12	11	8	8	1	6	9	17	6	9	6	12	1	6	4	1	6	1	5	4	1	1	1	1	1	1	1	8	7	8	3	2	1	1	3	10	1	1
159	815	6541333	109104958	109104958_ 815	1	1	1	1	1	1	1	1	1	1	1	1	1	1	1	6	1	1	2	1	1	1	1	2	1	1	1	1	1	1	1	1	1	1	1	1	1	1	1
160	1401	11234384	109102829	109102829_1401	1	1	1	1	1	6	1	1	1	2	1	1	1	1	1	1	1	2	3	1	1	1	1	1	1	1	1	7	1	1	1	1	1	1	1	1	1	1	1
161	1569	12585083	109968063	109968063_1569	2	1	1	1	2	1	1	3	1	1	1	2	1	1	2	1	1	1	1	2	1	1	1	1	1	1	1	2	2	1	1	1	1	1	1	2	1	1	1
162	1605	12871700	109967155	109967155_1605	1	1	1	3	2	1	2	1	1	1	1	3	1	1	1	1	1	1	1	1	1	1	1	1	1	1	1	1	1	1	1	1	1	1	1	2	1	1	1
163	90	721100	110004601	110004601_ 90	3	1	2	1	1	1	1	1	1	1	1	1	1	1	1	10	1	1	1	1	1	1	1	3	1	1	1	1	1	2	1	1	1	1	2	1	1	2	1
164	1571	12600467	110005066	110005066_1571	3	1	2	1	1	3	1	1	2	1	1	1	3	1	1	1	1	2	1	2	3	4	1	3	1	2	3	4	1	3	3	4	1	1	1	1	1	1	1
165	166	1335083	110022827	110022827_ 166	8	6	6	1	1	1	1	1	1	1	1	1	1	2	1	1	1	1	1	1	1	1	1	1	1	1	1	1	1	1	1	1	1	1	1	1	1	1	1
166	1458	11692467	110054909	110054909_1458	2	1	1	1	1	1	6	1	1	1	1	1	2	1	2	8	3	1	3	1	1	1	1	1	1	1	1	1	1	1	1	3	1	1	1	1	1	1	4
167	109	877000	110059868	110059868_ 109	14	16	15	6	9	1	16	24	3	4	12	1	10	4	1	10	7	1	3	6	12	1	1	7	1	1	1	5	9	4	1	13	1	8	7	1	1	9	3
168	405	3251433	110058784	110058784_ 405	2	2	1	1	1	1	1	1	5	1	1	2	5	1	2	3	1	1	1	1	1	1	1	1	1	1	1	1	3	1	1	1	3	1	3	1	1	11	3
169	839	6726100	110059616	110059616_ 839	1	1	1	1	1	1	1	1	1	1	1	1	1	1	1	1	1	1	1	1	1	1	3	1	1	1	1	1	1	1	1	1	1	5	1	3	1	1	1
170	1018	8161633	110057198	110057198_1018	1	1	1	1	1	1	1	1	1	1	1	1	1	1	1	3	3	1	5	3	6	1	1	1	1	1	1	6	1	1	1	2	1	6	1	1	3	4	1
171	456	3663233	110064583	110064583_ 456	1	1	1	1	1	1	1	1	3	1	1	1	4	1	2	1	1	1	1	1	1	1	1	1	1	1	1	1	1	1	1	1	2	1	1	1	1	1	4
172	471	3778650	110066589	110066589_ 471	45	41	46	1	1	1	129	56	75	1	1	5	192	140	126	8	4	1	37	51	70	30	19	42	68	122	101	62	47	11	92	151	104	62	35	5	67	135	115
173	490	3934450	110066429	110066429_ 490	2	1	1	1	1	1	2	1	4	1	1	1	5	5	3	4	2	1	2	1	1	1	3	1	1	1	5	3	1	1	1	11	8	6	1	1	2	14	17
174	522	4190283	110065018	110065018_ 522	1	1	1	1	1	1	2	1	1	1	1	1	8	1	4	1	1	1	1	1	1	1	1	1	1	1	2	1	1	1	1	6	1	1	1	1	1	6	5
175	570	4569334	110066628	110066628_ 570	9	8	11	1	1	1	8	4	6	1	1	1	32	24	19	1	1	1	3	5	5	1	1	4	4	27	16	8	9	1	14	35	30	6	1	1	13	29	19
176	163	1312000	110071350	110071350_ 163	1	1	1	1	1	1	1	2	1	1	1	1	1	1	1	1	1	1	2	1	2	1	1	1	1	1	1	1	1	1	1	1	1	1	1	1	1	1	1
177	406	3259200	110074944	110074944_ 406	10	1	9	1	6	1	1	2	1	1	6	5	12	9	9	4	1	9	10	3	1	1	1	13	1	8	7	10	9	1	11	11	10	1	5	7	11	1	9
178	351	2816600	110078110	110078110_ 351	11	8	1	2	1	1	12	4	3	1	1	1	11	1	7	5	4	2	7	5	12	3	5	8	1	5	3	6	11	1	4	4	1	7	1	6	11	5	8
179	408	3274583	110077393	110077393_ 408	1	1	1	1	1	1	1	1	1	1	1	1	6	9	1	1	1	1	1	1	1	1	1	1	1	4	1	1	1	1	1	1	1	1	1	1	5	1	1
180	581	4663667	110071716	110071716_ 581	1	1	1	1	1	1	1	1	1	1	1	1	1	1	1	1	1	1	1	1	1	1	1	1	1	1	5	1	1	1	1	9	5	1	1	1	1	1	1
181	1208	9691116	110098618	110098618_1208	3	3	4	1	1	1	1	1	1	1	1	1	1	1	1	1	1	1	1	1	1	12	1	1	1	1	1	1	1	1	1	1	1	1	1	1	1	1	1
182	626	5019633	110101784	110101784_ 626	1	1	1	2	1	1	1	1	1	1	4	1	1	1	1	2	1	1	1	1	1	1	1	1	1	1	1	1	1	1	1	1	1	1	1	1	1	1	1
183	1289	10333883	110099960	110099960_1289	8	9	8	1	1	1	1	1	9	1	1	2	1	1	1	1	1	1	1	1	1	13	1	1	1	1	1	1	4	1	1	1	1	1	1	1	1	1	1
184	137	1102250	110970093	110970093_ 137	5	1	3	1	1	1	1	1	1	1	1	1	3	1	3	1	1	1	1	1	1	2	3	2	1	1	2	1	3	1	1	2	1	1	1	3	3	1	1
185	135	1086850	110974823	110974823_ 135	1	1	3	1	1	1	1	1	1	1	1	1	3	1	1	1	1	1	1	1	1	1	3	1	1	1	1	1	1	1	1	1	1	1	1	1	1	1	1
186	1109	8890750	111006004	111006004_1109	5	4	4	3	3	7	12	5	1	3	1	3	4	1	1	1	1	1	2	1	6	1	4	1	1	4	2	1	4	1	1	1	1	1	1	1	1	1	1
187	1584	12700500	111015495	111015495_1584	1	1	1	2	1	3	1	1	2	4	5	3	3	1	1	2	1	2	1	1	4	1	1	1	1	1	1	1	3	1	1	3	1	1	1	1	1	1	1
188	839	6726100	111029518	111029518_ 839	1	1	1	1	1	1	1	1	1	1	1	1	1	1	1	1	1	1	5	1	1	1	1	1	4	1	7	1	2	1	1	1	1	1	1	1	1	1	1
189	793	6362350	111038994	111038994_ 793	5	5	6	7	9	4	10	1	1	1	8	7	10	5	6	1	4	3	6	1	4	4	1	5	1	1	1	4	6	6	1	2	1	4	3	4	3	1	1
190	818	6564500	111036903	111036903_ 818	2	1	1	1	3	2	1	1	1	1	1	1	1	1	1	1	1	1	1	1	1	1	1	1	1	1	1	1	1	1	1	1	1	1	1	1	1	1	1
191	840	6733800	111041100	111041100_ 840	9	10	10	10	13	10	11	7	1	8	10	12	17	11	12	9	9	9	12	8	8	8	8	9	1	10	1	8	13	9	6	8	5	9	1	7	10	9	5
192	470	3770967	111070313	111070313_ 470	3	1	1	1	1	1	10	4	1	1	1	1	16	10	7	1	1	1	1	2	4	2	1	1	1	1	5	4	3	1	6	9	7	1	1	1	4	1	6
193	524	4205683	111075439	111075439_ 524	1	1	1	5	1	1	1	1	1	1	1	5	3	1	1	1	1	1	1	1	1	1	1	1	1	1	1	1	1	1	1	1	1	1	1	1	1	1	1
194	1174	9419900	111078850	111078850_1174	11	32	27	1	1	1	1	1	1	1	1	1	1	1	1	1	1	1	1	1	1	1	1	1	1	1	1	1	1	1	1	1	1	1	1	1	1	1	1
195	1138	9123500	111076012	111076012_1138	26	17	21	1	1	1	1	1	1	9	8	12	19	23	15	1	1	1	1	1	3	43	3	1	1	1	1	1	1	4	1	1	1	1	1	1	1	1	4
196	1164	9333350	111075241	111075241_1164	26	8	10	1	1	1	1	1	1	1	1	1	3	6	1	1	1	1	1	1	1	36	1	1	1	1	1	1	1	1	1	1	1	1	1	1	1	1	1
197	1271	10195383	111078247	111078247_1271	42	37	44	1	1	1	1	1	9	1	1	4	1	1	7	1	1	1	1	1	1	40	1	1	1	1	1	1	23	1	2	1	1	1	1	1	1	1	1
198	1289	10333883	111078812	111078812_1289	58	66	65	3	5	1	7	3	27	12	16	28	15	14	12	7	3	1	4	1	4	71	1	5	1	1	1	5	13	1	9	1	1	1	1	5	6	1	1
199	1333	10691750	111077713	111077713_1333	1	1	1	4	1	1	1	2	17	1	2	1	1	1	1	1	1	1	1	1	1	6	1	1	1	1	1	1	18	1	11	1	1	1	1	1	8	1	1
200	1402	11242084	111077423	111077423_1402	1	1	1	1	1	1	1	2	1	1	1	1	1	1	1	1	1	1	1	1	1	1	1	1	1	1	1	1	5	1	3	1	1	1	1	1	1	1	2
201	1459	11700167	111078613	111078613_1459	3	6	1	4	5	1	7	4	5	1	5	7	7	1	5	3	1	3	1	1	6	4	1	1	1	1	2	3	6	1	6	1	1	1	1	4	1	4	5
202	1477	11848267	111079857	111079857_1477	1	1	1	2	1	1	1	1	4	1	1	1	1	1	5	2	1	3	1	1	1	1	1	1	1	1	1	1	1	1	4	1	1	1	1	3	1	1	1
203	112	900083	111087952	111087952_ 112	12	10	10	1	1	1	1	1	1	1	1	1	11	1	4	3	1	1	1	1	1	1	1	4	1	4	1	1	1	1	1	1	1	1	1	1	8	1	10
204	525	4213367	111081947	111081947_ 525	1	1	1	1	7	1	1	1	1	5	8	1	1	1	1	7	3	3	1	1	1	1	5	4	1	1	1	1	1	1	1	1	1	1	1	1	1	1	1
205	665	5338917	111081589	111081589_ 665	1	1	1	1	1	1	1	1	1	1	1	1	1	1	1	1	1	1	1	1	1	1	1	4	1	1	1	1	1	3	1	1	1	3	1	1	1	1	1
206	176	1412033	111089516	111089516_ 176	6	5	5	1	1	1	12	1	1	1	1	1	1	1	1	1	1	1	1	1	8	1	1	1	1	1	1	1	1	1	1	1	1	3	1	1	4	1	1
207	1393	11172816	111091927	111091927_1393	1	1	1	1	1	1	1	1	1	1	1	1	1	1	2	2	1	3	1	1	1	2	1	1	2	1	1	1	1	1	4	2	1	1	1	1	1	1	1
208	1465	11746333	111092285	111092285_1465	1	3	1	1	1	1	1	1	1	1	1	1	1	4	1	6	1	3	3	2	1	4	1	1	1	3	1	4	3	1	2	3	2	2	1	1	2	3	1
209	1271	10195383	111110283	111110283_1271	1	5	34	2	1	1	1	2	1	5	1	1	11	1	1	1	1	2	1	1	1	10	1	1	1	1	1	2	2	1	1	2	1	1	1	1	1	1	1
210	1137	9115800	111113640	111113640_1137	1	16	18	1	1	1	1	1	1	1	1	4	15	14	11	1	1	1	1	1	1	1	1	1	1	1	1	1	1	1	1	1	1	1	1	1	1	1	1
211	1164	9333350	111113579	111113579_1164	69	63	68	2	1	1	1	1	2	6	5	7	18	13	12	1	1	1	1	1	1	18	1	1	1	1	1	1	3	2	1	3	1	1	1	1	1	1	1
212	1233	9893184	111113739	111113739_1233	2	2	1	1	1	1	1	1	1	1	1	1	2	1	1	1	1	1	1	1	1	4	1	1	1	1	1	1	1	1	1	1	1	1	1	1	1	1	1
213	1289	10333883	111114655	111114655_1289	50	49	45	8	3	1	9	1	22	8	1	23	11	5	9	2	4	5	5	1	6	75	6	1	1	5	1	3	19	1	1	4	1	1	1	4	10	4	1
214	1339	10737917	111113197	111113197_1339	1	1	1	1	1	1	1	1	4	1	1	1	1	1	1	1	1	1	1	1	1	1	1	1	1	1	1	1	2	1	1	2	1	1	1	1	1	1	1
215	1382	11088183	111112907	111112907_1382	1	5	3	5	1	1	1	2	12	1	1	1	1	1	1	3	1	2	1	1	3	8	1	1	1	1	2	1	15	1	2	3	1	1	1	1	6	2	1
216	1390	11149734	111115517	111115517_1390	1	1	1	1	1	1	1	1	5	1	1	1	1	1	1	1	1	1	1	1	1	1	1	1	1	1	2	1	10	1	1	1	1	1	1	1	1	1	1
217	1473	11817483	111114067	111114067_1473	1	9	9	6	1	4	12	7	12	7	10	15	9	1	9	1	7	6	7	8	5	5	6	4	1	7	1	5	3	6	8	5	3	1	4	8	8	5	5
218	1488	11932917	111116425	111116425_1488	1	1	1	2	1	1	1	6	4	1	1	1	1	1	1	1	1	1	1	1	1	1	1	1	1	1	1	1	1	1	4	1	1	1	1	1	1	1	2
219	1591	12763967	111599586	111599586_1591	1	1	1	1	1	1	1	1	1	1	1	1	1	2	2	1	1	1	2	1	1	1	1	1	1	1	1	1	1	1	1	1	1	1	1	1	1	1	1
220	1639	13143017	111967522	111967522_1639	11	4	1	23	21	1	1	1	18	23	1	22	1	10	6	1	1	1	1	1	1	1	1	1	1	19	1	9	1	1	1	1	1	1	14	8	1	14	11
221	1572	12608167	112009789	112009789_1572	1	1	1	1	1	1	1	1	1	1	1	2	1	2	1	1	1	2	1	1	1	1	1	1	1	1	1	1	1	1	1	1	1	1	1	1	1	1	1
222	101	815433	112047218	112047218_ 101	7	1	7	1	2	1	1	9	9	1	4	1	8	2	1	3	1	1	6	1	1	1	1	4	3	5	1	7	11	1	9	5	1	9	1	5	7	4	3
223	1290	10341583	112082825	112082825_1290	4	4	4	1	1	1	1	1	1	1	1	1	1	1	1	1	1	1	1	1	1	1	1	1	1	1	1	1	4	1	1	1	1	1	1	1	1	1	1
224	1434	11498100	112080322	112080322_1434	1	1	1	1	1	3	1	1	1	1	1	1	1	1	1	1	1	4	2	1	1	1	1	1	1	1	1	1	4	1	1	1	1	1	1	1	1	1	1
225	1543	12375417	112084328	112084328_1543	1	1	1	1	1	1	1	1	1	1	1	1	1	1	1	1	1	1	1	1	1	1	1	1	1	1	1	1	2	1	1	1	1	14	4	8	1	1	1
226	421	3384317	112108589	112108589_ 421	11	13	15	4	4	4	20	16	10	8	10	3	19	20	10	4	4	6	14	12	21	1	9	9	8	10	13	7	5	5	16	16	8	8	4	6	18	13	13
227	436	3499733	112108154	112108154_ 436	1	7	5	1	1	1	7	4	7	1	4	1	8	5	1	1	1	1	8	4	11	1	3	1	1	1	1	3	1	1	4	5	1	4	1	1	6	8	4
228	1296	10397350	112113632	112113632_1296	4	5	1	1	1	1	1	1	1	1	1	1	1	1	1	1	1	1	1	1	1	6	1	1	1	1	1	1	1	1	1	1	1	1	1	1	1	1	1
229	1616	12956433	112955780	112955780_1616	1	4	1	1	1	1	1	1	1	4	1	1	1	1	1	1	1	1	1	1	1	3	1	1	1	1	1	1	1	1	2	1	3	1	1	3	1	1	1
230	1581	12677417	112956848	112956848_1581	2	5	7	1	4	1	1	1	1	4	1	1	1	1	1	1	1	1	2	2	2	5	1	1	7	1	1	1	1	1	5	1	9	1	1	5	8	1	2
231	804	6447000	112963150	112963150_ 804	1	1	2	1	1	1	1	2	1	1	1	1	1	1	1	1	1	1	1	1	1	1	1	1	1	1	1	1	1	1	2	1	1	1	1	1	1	1	1
232	1646	13196867	112960960	112960960_1646	1	1	1	1	1	1	1	1	1	2	1	1	3	1	1	1	1	1	1	1	1	3	1	1	1	1	1	1	1	1	1	1	1	1	1	1	3	1	2
233	1583	12692817	112965248	112965248_1583	7	7	5	1	8	7	7	7	8	8	7	5	6	4	7	1	1	1	5	5	5	5	6	7	1	8	8	4	7	7	8	1	7	1	6	8	8	10	9
234	1590	12746667	112967590	112967590_1590	1	2	2	1	6	8	9	5	6	6	4	4	5	6	1	1	1	1	3	2	5	3	1	3	1	1	4	1	4	1	2	1	1	1	2	6	5	5	2
235	201	1614000	113027908	113027908_ 201	4	1	1	2	1	1	7	8	1	1	1	1	1	1	1	1	1	1	1	1	1	1	1	1	1	1	1	1	1	1	1	2	1	1	1	1	1	1	1
236	379	3041750	113029701	113029701_ 379	6	7	6	1	1	1	1	1	1	1	4	1	5	1	1	1	8	5	1	1	1	1	1	4	1	1	1	1	1	1	1	1	1	1	1	3	1	1	1
237	110	884700	113031746	113031746_ 110	70	74	73	12	12	3	217	270	249	4	13	9	16	9	7	11	11	11	20	10	29	1	3	5	1	9	3	1	1	1	8	1	1	1	3	3	4	1	1
238	133	1071467	113031570	113031570_ 133	36	35	40	3	6	1	134	170	131	1	4	1	8	4	3	3	4	2	7	5	12	1	1	2	1	1	1	1	1	1	1	1	1	1	1	1	1	1	1
239	617	4950383	113056038	113056038_ 617	3	3	4	1	1	1	1	1	1	5	11	4	1	1	1	4	6	5	1	1	1	4	1	5	1	1	1	1	8	4	1	1	1	4	1	3	1	1	1
240	685	5492816	113056335	113056335_ 685	8	1	8	5	1	4	1	1	1	8	12	6	4	4	1	10	8	12	4	1	5	1	12	10	1	1	3	10	14	7	4	4	1	9	8	6	1	4	1
241	932	7480400	113053223	113053223_ 932	3	1	1	1	1	1	1	1	1	1	7	1	1	1	1	2	1	1	1	1	1	1	1	1	1	2	1	1	1	1	1	1	1	1	1	1	1	1	1
242	386	3095617	113067924	113067924_ 386	5	1	4	1	1	1	1	1	1	1	1	2	5	3	1	1	1	2	4	4	1	1	3	2	1	1	3	1	3	1	3	3	1	1	1	1	4	1	1
243	777	6229633	113091278	113091278_ 777	1	1	1	1	1	1	1	1	1	1	1	1	1	1	1	1	1	3	1	1	1	1	2	6	1	1	1	1	3	1	1	1	1	1	1	1	1	1	1
244	1163	9325650	113093750	113093750_1163	48	46	48	1	1	1	1	1	1	1	1	6	12	19	11	1	1	1	1	1	1	6	1	1	1	1	1	1	1	1	1	1	1	1	1	1	1	1	1
245	1272	10203067	113094276	113094276_1272	9	8	7	1	1	1	1	1	1	1	1	1	1	1	1	1	1	1	1	1	1	7	1	1	1	1	1	1	1	1	1	1	1	1	1	1	1	1	1
246	1290	10341583	113092560	113092560_1290	7	6	7	1	1	1	1	1	1	1	1	1	1	1	1	1	1	1	1	1	1	1	1	1	1	1	1	1	1	1	1	1	1	1	1	1	1	1	1
247	326	2614633	113101379	113101379_ 326	1	3	1	1	1	1	6	4	1	1	1	1	1	1	1	1	1	1	3	3	1	1	1	1	1	1	3	1	1	1	1	2	1	1	1	1	1	1	1
248	1637	13127617	113960861	113960861_1637	1	1	1	296	1	306	324	345	340	1	1	1	357	1	1	290	327	1	203	1	1	1	1	1	1	1	1	246	215	1	1	1	1	226	232	172	1	217	194
249	107	861617	114033813	114033813_ 107	4	3	1	1	1	1	5	11	11	1	1	1	1	1	1	1	1	1	1	1	1	1	1	1	1	1	1	1	1	1	1	1	1	1	1	1	1	1	1
250	669	5369700	114035477	114035477_ 669	1	1	1	1	1	1	2	1	1	1	1	1	1	1	1	1	3	3	1	1	1	1	1	4	1	1	1	1	1	1	1	1	1	1	1	3	1	1	1
251	363	2918533	114086807	114086807_ 363	1	1	1	1	1	1	4	1	1	1	1	1	3	1	3	1	1	1	1	1	1	1	1	1	1	1	1	1	1	1	3	1	1	1	1	1	2	2	1
252	1174	9419900	114087692	114087692_1174	21	18	20	1	1	1	1	1	4	1	1	1	1	1	1	1	1	1	1	1	1	92	1	1	1	1	1	1	1	2	1	2	1	1	1	1	1	1	1
253	1226	9829717	114087395	114087395_1226	3	7	1	1	1	1	1	1	1	1	1	1	1	1	1	1	1	1	1	1	1	26	1	1	1	1	1	1	1	1	1	1	1	1	1	1	1	1	1
254	1234	9900884	114087914	114087914_1234	9	4	5	1	1	1	1	1	1	1	1	1	1	1	1	1	1	1	1	1	1	37	1	1	1	1	1	1	1	1	1	1	1	1	1	1	1	1	1
255	1398	11211300	114087036	114087036_1398	1	1	1	10	1	1	1	7	1	1	1	1	1	1	3	1	1	1	1	1	1	1	1	1	1	1	1	1	1	1	1	1	1	1	1	1	2	1	1
256	378	3034050	114087311	114087311_ 378	8	8	6	3	4	1	15	5	2	1	7	4	12	9	7	5	3	5	3	6	10	1	5	7	1	3	3	5	1	2	4	7	4	1	3	5	4	5	7
257	459	3686317	114088287	114088287_ 459	2	3	2	1	1	1	5	1	2	1	3	1	4	4	1	3	1	2	1	3	5	1	1	3	2	1	1	1	1	1	3	4	3	1	1	2	1	4	3
258	472	3786350	114088524	114088524_ 472	9	7	11	8	6	4	11	12	8	5	3	4	11	11	4	5	5	5	8	9	9	4	6	7	5	5	7	6	5	6	5	7	8	1	4	6	7	7	9
259	598	4794483	114088158	114088158_ 598	4	2	3	1	1	1	7	3	3	1	3	1	6	3	5	1	1	2	5	5	5	1	1	1	1	3	1	3	1	1	3	2	2	1	1	1	5	1	1
260	610	4896417	114089256	114089256_ 610	1	1	1	1	1	1	4	1	1	1	1	1	3	1	1	1	1	1	2	1	2	1	1	1	1	1	1	1	1	1	1	1	1	1	1	1	1	1	1
261	1208	9691116	114089424	114089424_1208	25	24	24	1	1	1	1	1	1	1	1	1	1	1	1	1	1	1	1	1	1	81	1	1	1	1	1	1	1	2	1	1	1	1	1	1	1	1	1
262	1289	10333883	114088814	114088814_1289	108	123	97	13	1	1	4	8	30	2	1	3	1	1	8	8	3	1	7	1	5	127	1	1	1	1	1	4	22	1	12	1	1	1	1	4	14	3	3
263	1317	10559033	114088417	114088417_1317	3	5	1	7	1	1	1	1	13	1	1	1	1	1	1	1	1	1	1	1	1	6	1	1	1	1	1	1	26	1	2	1	1	1	1	1	3	1	1
264	1335	10707133	114086746	114086746_1335	1	5	6	3	1	1	1	1	6	1	1	1	1	1	1	1	1	1	1	1	1	1	1	1	1	1	1	1	13	1	1	1	1	1	1	1	5	1	1
265	1380	11063200	114088753	114088753_1380	7	7	5	17	1	1	1	9	24	1	1	1	1	1	4	1	1	1	1	1	1	12	1	1	1	1	1	1	20	1	14	1	1	1	1	1	13	1	1
266	1469	11777117	114089989	114089989_1469	13	9	7	12	6	3	13	6	7	7	12	12	9	5	10	8	1	7	1	10	7	1	1	3	3	9	2	1	9	7	1	3	1	1	3	7	9	1	11
267	1479	11863650	114088326	114088326_1479	1	1	9	5	1	1	1	1	11	1	1	3	1	1	12	1	1	1	1	1	1	1	1	1	1	1	2	1	1	1	1	2	1	1	1	1	12	1	1
268	1630	13073750	114262589	114262589_1630	3	1	1	2	9	2	1	5	13	11	13	12	3	3	5	1	8	1	1	7	4	7	1	4	5	6	1	2	1	5	3	4	1	1	1	1	1	1	3
269	1618	12971817	114260666	114260666_1618	2	1	1	3	1	1	1	3	1	1	1	5	2	1	7	1	1	1	1	2	7	1	1	1	1	5	1	1	1	1	1	2	1	1	1	1	1	1	1
270	1650	13227650	114263580	114263580_1650	3	1	1	1	1	1	1	1	5	1	6	10	1	4	5	1	2	1	1	3	6	2	1	2	1	5	1	1	1	3	4	2	1	1	1	1	1	1	2
271	1638	13135317	114961700	114961700_1638	1	1	3	1	12	11	1	1	1	22	1	1	1	14	4	14	1	1	1	1	6	1	1	1	1	1	1	1	10	1	1	1	9	8	7	1	1	1	1
272	1618	12971817	114968811	114968811_1618	1	1	1	1	1	1	1	1	1	1	1	1	1	8	1	1	1	1	1	1	1	1	1	1	2	1	1	1	1	1	1	1	1	3	1	1	1	1	1
273	1137	9115800	115071693	115071693_1137	22	5	23	1	1	1	1	1	1	1	1	10	17	17	9	1	1	1	1	1	1	1	1	1	1	1	1	1	1	1	1	1	1	1	1	1	1	1	1
274	1272	10203067	115074837	115074837_1272	32	1	28	1	1	1	1	1	1	7	14	20	10	11	1	1	1	1	1	1	1	1	1	2	1	1	1	2	1	1	1	1	1	1	1	1	2	1	1
275	534	4282633	115083382	115083382_ 534	1	6	5	1	1	1	10	3	4	1	5	1	8	6	5	3	1	1	5	4	10	3	1	6	1	6	6	1	1	3	1	6	1	1	1	1	4	6	7
276	1295	10389650	115089523	115089523_1295	6	5	1	1	1	1	1	1	1	1	1	1	1	1	1	1	1	1	1	1	1	11	1	1	1	1	1	1	1	1	2	1	1	1	1	1	1	1	1
277	1273	10210767	115103844	115103844_1273	5	4	12	1	1	1	1	1	3	1	1	3	1	1	1	1	1	1	1	1	1	12	1	1	1	1	1	1	1	1	1	1	1	1	1	1	1	1	1
278	703	5640917	115958626	115958626_ 703	1	2	1	1	1	1	1	1	1	1	1	1	1	1	1	1	3	1	1	1	1	1	1	1	1	1	1	1	1	1	1	1	1	1	1	1	1	2	1
279	797	6393133	115960258	115960258_ 797	1	1	1	1	1	2	1	1	1	1	1	1	1	1	1	3	1	1	1	1	1	1	1	1	1	1	1	1	1	1	1	1	1	1	1	2	1	1	1
280	819	6572200	115962227	115962227_ 819	1	2	1	1	1	2	1	1	1	1	1	1	1	1	1	1	1	1	1	1	1	1	1	1	1	1	1	2	1	1	1	1	1	1	2	1	1	1	1
281	1575	12631250	115961739	115961739_1575	1	14	1	18	1	24	20	1	1	1	46	1	1	1	49	14	24	46	16	1	4	1	1	6	1	1	1	10	12	20	1	1	1	1	17	1	1	24	1
282	1581	12677417	115961662	115961662_1581	32	33	29	71	67	60	63	60	65	72	57	58	61	68	69	64	62	60	54	62	49	54	50	56	53	54	54	52	42	55	46	48	48	45	48	45	43	42	44
283	1599	12825517	115962112	115962112_1599	1	7	1	1	1	19	10	1	1	1	22	1	1	1	25	9	20	27	8	1	1	5	1	3	1	3	1	6	1	8	1	1	4	1	8	1	1	7	1
284	1640	13150700	115961151	115961151_1640	1	1	1	1	1	10	1	1	1	1	3	1	1	1	1	1	1	1	1	1	1	1	1	1	1	1	1	1	1	1	1	1	1	6	1	1	1	1	1
285	940	7541950	115964493	115964493_ 940	3	2	1	1	1	2	1	1	1	1	1	1	1	1	1	1	1	3	3	1	1	1	1	1	2	1	1	2	1	1	1	1	1	2	1	2	1	1	1
286	996	7992150	115963280	115963280_ 996	1	1	1	1	1	2	1	1	1	1	1	1	1	1	1	3	1	1	1	1	1	1	1	1	1	1	1	2	1	1	1	1	1	2	1	1	1	2	1
287	1059	8496317	115963951	115963951_1059	1	1	1	1	1	1	1	1	1	1	1	1	1	1	1	5	4	1	1	1	1	1	1	4	1	1	1	1	1	1	2	1	1	2	1	1	1	2	1
288	472	3786350	116069077	116069077_ 472	1	1	1	1	1	1	1	1	1	1	10	1	1	1	1	2	1	2	1	1	1	1	1	4	1	1	1	1	4	1	1	1	1	1	1	1	1	1	1
289	551	4423133	116068932	116068932_ 551	1	5	1	4	7	1	1	1	5	13	29	12	6	4	1	1	22	21	5	1	1	12	21	24	1	2	1	10	27	10	1	1	1	1	6	5	1	1	1
290	1574	12623550	116968117	116968117_1574	7	7	6	1	14	14	15	14	14	12	17	16	13	12	17	1	17	1	13	15	14	13	13	16	12	6	12	13	11	13	11	1	11	8	9	7	12	1	11
291	1616	12956433	116967567	116967567_1616	2	1	3	1	12	7	3	3	1	1	3	1	11	1	3	1	7	1	10	1	1	6	3	5	1	1	2	5	4	5	6	1	6	2	1	1	2	1	2
292	1568	12577383	116966530	116966530_1568	3	1	1	1	5	1	1	1	1	1	2	1	6	1	1	1	1	1	3	1	1	2	1	3	1	1	1	1	1	1	3	1	6	1	1	1	3	1	2
293	1598	12817833	116965370	116965370_1598	3	1	1	1	3	1	1	1	1	1	1	1	4	1	1	1	1	1	2	1	1	1	1	1	1	1	1	1	1	1	1	1	1	1	1	1	1	1	1
294	1088	8729067	116971817	116971817_1088	1	1	1	1	1	1	1	1	1	2	1	1	1	1	1	1	1	1	1	1	1	1	1	1	2	1	1	1	1	1	1	1	1	1	1	1	1	1	2
295	516	4144117	117053955	117053955_ 516	10	1	10	6	4	4	1	1	1	3	10	6	1	2	1	5	1	4	1	1	1	1	1	2	1	1	1	1	1	1	1	1	1	1	1	1	1	1	1
296	583	4679050	117057541	117057541_ 583	5	1	5	2	2	1	1	1	1	1	6	3	1	1	3	2	1	1	5	2	4	1	1	3	1	1	1	1	1	1	1	1	1	1	1	1	1	1	1
297	1294	10381950	117056328	117056328_1294	1	4	6	1	1	1	1	1	1	1	1	3	1	1	1	1	1	1	1	1	1	1	1	1	1	1	1	1	1	1	1	1	1	1	1	1	1	1	1
298	1352	10847633	117053391	117053391_1352	1	14	1	1	1	1	1	1	1	3	3	1	1	1	4	1	1	1	1	1	1	1	1	1	1	1	1	1	1	1	1	1	1	1	1	1	1	1	1
299	1045	8378983	117064667	117064667_1045	2	1	4	1	1	1	3	1	1	1	3	1	1	5	2	1	1	2	4	1	1	1	3	1	1	1	1	1	3	1	1	3	1	1	1	1	1	3	1
300	589	4725234	117075348	117075348_ 589	1	2	1	3	1	1	4	1	1	1	1	1	1	1	1	1	1	1	1	1	1	1	1	1	1	1	1	1	1	1	1	1	1	1	1	1	1	1	1
301	1120	8984983	117950600	117950600_1120	1	1	1	1	1	1	1	2	1	1	1	1	1	1	1	1	1	1	1	1	2	1	1	1	2	1	1	1	1	1	1	1	1	1	1	1	1	1	1
302	820	6579900	117957359	117957359_ 820	1	1	1	2	2	1	1	1	1	2	1	1	1	1	1	1	1	1	1	1	1	2	1	2	1	2	1	1	1	1	1	1	1	1	1	2	1	1	1
303	1603	12856300	117957573	117957573_1603	7	1	1	6	2	2	8	5	1	2	5	1	1	5	2	1	1	1	1	3	3	4	3	3	2	6	3	1	2	2	2	1	1	1	2	4	4	1	1
304	988	7921000	117960976	117960976_ 988	1	1	1	1	1	1	1	1	2	1	1	2	2	1	1	1	2	1	1	2	2	1	1	1	2	1	2	1	1	1	1	1	3	1	1	2	1	1	1
305	1043	8363600	117960945	117960945_1043	1	1	1	3	1	1	1	1	2	2	2	1	1	2	1	1	1	1	1	2	2	2	1	1	1	2	1	1	1	1	1	1	1	1	1	1	2	1	1
306	1070	8580967	117959908	117959908_1070	1	1	1	2	1	1	1	2	1	1	1	1	2	1	1	1	2	1	1	1	2	1	1	1	1	2	2	1	1	1	1	1	1	1	1	1	1	1	1
307	1572	12608167	117958099	117958099_1572	12	12	11	31	25	20	19	22	18	25	21	22	22	24	21	1	20	21	23	22	22	23	21	23	17	23	21	17	17	25	20	1	16	16	16	11	14	16	12
308	1606	12879383	117958641	117958641_1606	1	1	1	1	1	1	1	2	1	2	1	1	1	1	2	1	1	1	1	1	1	3	1	1	1	6	1	1	1	1	2	1	1	1	1	1	1	1	1
309	1661	13321900	117959717	117959717_1661	1	1	1	1	1	2	1	1	1	1	1	1	2	1	1	1	1	1	1	1	1	2	1	1	2	3	1	1	1	1	1	1	1	1	1	1	1	1	1
310	396	3182150	118029259	118029259_ 396	10	6	9	1	1	1	1	1	1	1	1	1	8	4	1	1	1	3	15	10	18	8	6	10	12	21	13	14	10	8	11	22	9	15	5	1	14	1	15
311	488	3919067	118028114	118028114_ 488	1	1	1	1	1	1	1	3	1	1	1	1	1	1	1	1	3	2	1	4	1	1	3	5	2	5	1	4	1	1	3	10	2	9	1	1	1	7	1
312	704	5648617	118029938	118029938_ 704	1	1	2	1	1	1	1	1	1	1	1	1	2	1	1	1	1	1	1	2	1	1	1	1	1	4	1	3	1	1	1	2	1	1	1	1	1	1	1
313	565	4530867	118030136	118030136_ 565	4	3	1	1	1	1	1	1	1	1	1	1	1	1	1	1	1	2	10	4	15	5	1	7	15	27	1	11	6	5	16	16	4	12	3	1	1	12	5
314	502	4026800	118035667	118035667_ 502	1	1	1	1	1	1	1	1	1	1	1	1	1	1	1	1	1	1	1	1	1	1	1	1	1	1	1	1	4	1	1	5	1	1	1	1	2	1	2
315	513	4121033	118063026	118063026_ 513	55	59	64	32	48	26	193	80	80	16	49	27	120	74	75	37	42	40	63	43	68	32	52	50	29	51	40	56	70	41	40	46	47	58	48	52	44	59	64
316	390	3126383	118066132	118066132_ 390	1	1	2	1	1	1	1	1	1	1	1	1	1	1	1	1	1	1	1	1	1	1	1	2	1	1	1	1	1	1	1	1	1	1	1	1	3	1	1
317	557	4469300	118067871	118067871_ 557	55	50	6	1	6	1	1	8	38	30	4	27	55	1	1	3	3	1	27	3	6	4	1	4	8	15	1	8	5	7	1	16	1	13	1	10	1	23	16
318	24	194050	118081505	118081505_ 24	1	1	1	1	1	1	1	1	1	1	1	1	1	1	1	1	1	3	1	1	2	1	1	1	1	1	4	1	1	1	1	1	1	1	1	1	1	1	1
319	103	830833	118078087	118078087_ 103	1	1	6	1	1	1	1	1	1	1	1	1	1	1	1	3	1	1	1	1	1	2	1	1	1	1	1	1	1	1	1	3	1	1	1	1	1	1	1
320	333	2678083	118079918	118079918_ 333	1	1	3	1	1	1	1	1	3	1	1	1	1	1	1	1	1	6	1	1	1	2	1	2	1	1	1	1	1	1	1	6	1	1	2	3	1	1	1
321	397	3189850	118072891	118072891_ 397	1	1	1	1	1	1	1	1	1	1	1	1	1	1	1	1	1	2	1	1	1	1	1	2	1	1	1	1	1	3	1	1	1	1	1	3	1	5	6
322	469	3763267	118074142	118074142_ 469	1	1	1	1	1	1	1	1	1	1	1	1	1	1	1	3	1	1	1	4	6	6	1	1	8	1	1	1	1	6	6	1	1	1	1	10	1	1	1
323	622	4988850	118076118	118076118_ 622	1	3	4	1	1	1	1	1	1	1	1	1	1	1	1	1	1	1	1	1	1	3	1	2	1	1	1	1	1	1	1	3	1	1	1	3	1	1	1
324	818	6564500	118077652	118077652_ 818	1	1	2	1	1	1	1	1	1	1	1	1	1	1	1	1	1	3	1	1	1	4	1	2	1	1	4	1	1	1	1	4	1	1	2	5	1	1	1
325	928	7440017	118078384	118078384_ 928	1	1	1	1	1	1	1	1	1	1	1	1	1	1	1	4	1	3	1	1	1	2	1	2	1	1	1	1	1	1	1	3	1	1	2	3	1	1	1
326	942	7557350	118080063	118080063_ 942	1	1	1	1	1	1	1	1	1	1	1	1	1	1	1	3	1	3	1	1	1	3	1	1	1	1	1	1	1	1	1	2	1	1	1	1	1	1	1
327	1144	9179267	118075806	118075806_1144	1	1	1	1	1	1	1	1	1	1	1	1	1	1	1	4	1	3	1	1	1	1	1	1	1	1	1	1	1	3	1	1	1	1	1	1	1	1	1
328	1617	12964133	118075928	118075928_1617	1	1	2	1	1	1	1	1	1	1	1	1	1	1	1	1	1	1	1	1	1	3	1	2	1	1	1	1	1	1	1	4	1	1	1	1	1	1	1
329	709	5687100	118083183	118083183_ 709	1	1	4	1	1	1	1	1	3	1	1	1	1	1	1	3	1	3	1	1	1	1	1	1	1	1	1	1	1	1	1	1	1	1	1	4	1	1	1
330	774	6206550	118082756	118082756_ 774	1	1	1	1	1	1	1	1	1	1	1	1	1	1	1	2	1	1	1	1	1	3	1	1	1	1	1	1	1	1	1	1	1	1	1	2	1	1	1
331	1293	10374267	118084564	118084564_1293	1	1	4	1	1	1	1	1	1	1	1	1	1	1	1	1	1	6	6	6	4	1	1	1	1	1	2	1	1	1	1	1	1	1	1	1	1	1	1
332	1552	12444667	118084229	118084229_1552	1	1	7	1	1	8	1	12	10	1	8	7	1	11	1	9	1	9	12	5	6	1	10	1	1	1	8	8	1	1	1	12	1	9	12	9	1	9	1
333	1574	12623550	118965218	118965218_1574	1	2	3	5	7	4	6	1	6	4	4	6	6	3	5	1	4	4	7	4	6	2	5	5	6	5	7	5	1	5	2	5	1	3	1	5	4	1	1
334	1580	12669717	118965370	118965370_1580	1	1	2	1	4	3	3	1	1	2	6	3	3	1	1	1	1	7	1	3	1	1	1	4	1	1	3	1	1	2	1	1	1	2	1	1	1	1	1
335	688	5515900	119046059	119046059_ 688	1	1	1	1	1	1	3	5	3	1	1	1	1	1	1	1	1	1	1	1	3	1	1	12	1	1	1	1	3	1	1	1	1	12	1	4	1	2	1
336	728	5842900	119046120	119046120_ 728	23	21	24	15	25	13	39	12	12	26	46	22	26	14	15	15	16	15	15	11	31	16	20	28	2	14	5	21	22	16	15	14	1	16	14	11	18	6	8
337	792	6354650	119046402	119046402_ 792	100	98	101	96	127	77	129	66	64	101	149	121	153	84	96	81	82	67	93	69	98	86	90	118	26	87	47	71	102	81	67	56	38	84	67	71	64	77	55
338	772	6191167	119045547	119045547_ 772	6	13	6	6	14	5	13	5	9	8	7	18	29	11	1	10	7	9	1	7	6	2	5	7	1	3	5	2	6	4	9	4	10	3	1	4	7	3	4
339	818	6564500	119046486	119046486_ 818	41	34	44	29	53	23	41	24	20	30	71	44	62	29	40	29	36	23	31	30	39	26	33	48	8	24	23	27	52	29	23	22	11	28	22	25	26	20	25
340	834	6687634	119046074	119046074_ 834	50	53	50	41	54	32	69	29	31	46	64	50	84	56	49	44	39	40	58	41	46	47	49	56	14	40	30	41	50	42	28	38	21	44	34	46	37	43	35
341	931	7472700	119046463	119046463_ 931	18	20	22	18	22	16	32	16	19	14	23	13	42	16	19	22	18	13	12	21	14	23	16	26	7	18	16	14	19	17	12	11	5	12	6	10	8	12	9
342	1091	8752150	119047501	119047501_1091	1	1	2	4	4	1	2	1	2	3	4	1	9	1	1	1	1	1	2	1	5	1	1	5	1	1	1	1	1	1	1	1	1	1	1	1	1	1	1
343	1163	9325650	119045174	119045174_1163	1	1	1	1	1	1	3	1	1	2	1	1	5	1	1	2	1	1	1	3	1	1	1	4	1	1	1	1	1	1	1	2	1	4	1	3	1	1	1
344	435	3492050	119047661	119047661_ 435	15	14	14	9	6	1	25	13	18	9	2	4	19	19	16	8	6	1	20	14	22	5	12	9	7	14	11	14	1	5	1	4	10	10	13	20	1	15	16
345	559	4484684	119045937	119045937_ 559	1	1	2	1	7	1	1	1	1	5	7	6	1	1	1	10	4	1	1	1	1	5	7	14	1	1	1	8	17	10	1	1	1	1	8	6	1	1	3
346	743	5958416	119049759	119049759_ 743	1	1	1	3	4	1	4	1	1	1	1	1	5	1	1	1	1	1	1	1	3	1	1	1	1	1	1	1	2	1	1	1	1	1	1	1	1	1	1
347	772	6191167	119047157	119047157_ 772	1	1	1	6	4	2	6	1	2	3	6	1	11	3	1	4	1	1	1	1	3	1	1	1	1	1	1	1	1	1	1	1	1	1	1	4	1	1	1
348	898	7199483	119047249	119047249_ 898	16	18	26	11	26	15	38	15	18	17	33	23	35	22	27	23	21	15	19	23	15	16	22	21	8	1	18	15	17	6	11	11	8	16	11	11	10	13	11
349	970	7782483	119047607	119047607_ 970	1	7	1	6	1	1	9	1	3	1	1	1	16	1	1	5	1	1	1	1	3	1	1	1	2	1	1	1	1	1	1	2	1	1	1	1	1	1	1
350	1023	8209700	119047585	119047585_1023	6	8	7	9	7	6	17	5	7	1	13	4	21	1	10	8	11	1	6	10	7	8	9	10	5	8	4	1	9	7	1	8	1	6	1	1	1	1	1
351	1056	8473233	119047226	119047226_1056	6	6	3	14	9	6	18	1	5	5	11	4	14	6	1	9	7	1	1	4	10	8	7	4	1	1	6	5	1	3	1	7	1	6	1	1	1	6	1
352	1027	8240483	119047897	119047897_1027	1	8	5	6	9	6	10	6	3	1	5	7	17	1	1	9	6	1	7	1	3	2	6	6	1	1	1	1	1	1	1	4	1	1	1	1	1	1	1
353	1077	8634817	119046997	119046997_1077	1	1	1	1	1	1	1	1	1	1	4	1	7	1	1	3	1	1	1	1	3	1	1	1	1	1	1	1	1	1	1	1	1	1	1	1	1	1	1
354	1116	8954217	119046623	119046623_1116	8	6	8	10	13	6	16	3	8	10	15	8	19	3	14	7	10	1	10	6	11	12	9	14	1	9	7	9	14	6	5	6	1	7	7	7	5	1	7
355	109	877000	119057266	119057266_ 109	1	1	1	1	1	1	1	1	1	1	1	1	1	1	1	1	1	1	1	1	1	1	1	4	1	1	1	6	3	1	1	1	1	2	3	1	1	1	1
356	168	1350483	119057289	119057289_ 168	1	1	1	1	1	1	2	1	1	1	1	1	1	1	1	1	1	1	1	1	1	1	1	4	1	1	1	1	1	1	1	1	1	3	3	1	1	1	1
357	357	2862767	119057945	119057945_ 357	1	1	1	1	1	1	1	1	1	1	1	1	1	1	1	2	1	1	1	1	1	1	1	5	1	1	1	1	6	2	1	1	1	3	1	1	3	1	3
358	555	4453917	119063919	119063919_ 555	5	6	1	1	1	1	19	4	10	4	1	1	11	5	8	1	1	1	1	1	1	1	2	1	1	1	1	5	1	2	1	1	1	1	5	2	1	1	1
359	1061	8511700	119056534	119056534_1061	1	2	1	1	1	1	1	1	1	1	1	1	1	1	1	4	1	1	1	1	1	1	1	2	1	1	1	1	1	1	1	1	1	1	1	1	1	1	1
360	449	3599767	119073074	119073074_ 449	1	1	1	1	1	1	1	1	1	1	2	1	1	1	1	1	1	1	1	1	1	1	1	2	1	1	1	1	1	1	1	1	1	1	1	1	2	1	1
361	594	4763700	119079033	119079033_ 594	2	1	5	1	1	1	1	1	1	1	1	1	1	1	1	1	1	1	1	1	1	2	1	3	1	1	1	1	1	1	1	1	1	3	1	2	1	1	1
362	622	4988850	119080765	119080765_ 622	3	4	4	3	6	1	2	2	3	2	12	4	2	1	1	1	4	5	1	1	3	6	6	6	1	2	1	4	6	1	2	1	1	3	3	2	2	2	2
363	647	5190817	119082146	119082146_ 647	2	4	2	2	1	1	1	1	1	3	7	1	1	1	1	1	4	5	1	1	1	5	2	7	1	3	1	7	1	1	1	1	1	2	1	1	1	1	1
364	667	5354317	119081497	119081497_ 667	4	3	3	4	3	1	2	1	1	2	4	2	1	1	1	1	4	3	1	1	1	4	3	7	1	3	1	8	1	1	2	1	1	10	1	9	1	2	1
365	746	5981500	119082039	119082039_ 746	1	2	1	2	1	1	1	1	1	5	4	2	1	1	1	1	4	4	1	1	1	3	1	2	1	1	1	1	1	1	1	1	1	3	1	6	1	1	1
366	826	6626067	119081741	119081741_ 826	2	1	1	2	1	1	1	1	1	2	1	1	1	1	1	1	4	4	1	1	1	1	3	1	1	1	1	1	1	1	1	1	1	1	1	2	1	1	1
367	832	6672233	119082176	119082176_ 832	3	4	3	5	4	1	1	2	1	3	3	1	1	3	1	1	3	5	3	1	3	5	5	6	1	3	1	4	1	1	2	4	1	5	3	9	3	3	2
368	846	6789567	119081665	119081665_ 846	4	2	3	3	4	1	1	1	1	1	1	1	1	1	1	1	1	3	1	1	1	1	3	1	1	1	1	6	1	1	2	1	1	7	1	5	2	1	1
369	913	7324600	119082909	119082909_ 913	21	21	13	1	1	1	6	2	1	1	6	4	1	3	1	1	5	6	5	5	4	5	3	8	1	2	1	4	5	3	2	1	1	8	1	2	3	2	3
370	948	7603600	119081184	119081184_ 948	3	2	2	2	1	1	1	2	1	1	2	1	2	1	1	1	1	1	1	1	1	1	1	2	1	1	1	1	1	1	1	1	1	2	1	1	1	1	1
371	1075	8619433	119082893	119082893_1075	82	79	87	49	57	25	76	84	46	54	47	35	81	72	56	39	41	65	65	55	52	36	58	39	25	79	39	50	78	72	43	78	31	89	32	43	63	42	38
372	1208	9691116	119081291	119081291_1208	13	18	16	2	1	1	1	1	2	1	1	1	9	3	1	1	1	1	1	1	1	52	1	1	1	1	1	1	1	1	2	1	1	1	1	1	1	1	1
373	1043	8363600	119086250	119086250_1043	5	5	8	1	1	1	1	1	1	1	2	1	1	1	1	1	1	4	1	1	1	2	1	6	1	1	1	2	1	1	1	1	1	2	1	3	1	1	2
374	1164	9333350	119085327	119085327_1164	20	18	16	1	1	1	1	1	1	1	1	1	1	1	1	1	3	1	1	1	1	5	1	1	1	2	1	3	1	1	2	2	1	1	1	1	1	1	1
375	1329	10660967	119086197	119086197_1329	4	3	3	5	1	1	1	3	19	1	1	1	1	1	3	1	1	1	1	1	1	3	2	2	2	3	1	1	20	2	5	2	1	1	2	1	6	2	1
376	1390	11149734	119085579	119085579_1390	2	3	1	6	1	1	1	1	1	1	1	1	1	1	1	1	1	1	1	1	1	1	1	1	3	1	1	1	2	1	4	1	1	1	1	1	6	1	1
377	1391	11157434	119085678	119085678_1391	2	1	1	1	1	1	1	1	1	1	1	1	1	1	1	1	1	1	1	1	1	1	1	1	1	1	1	1	1	1	2	1	1	1	1	1	3	1	1
378	1572	12608167	119958755	119958755_1572	1	1	1	2	2	1	1	1	1	1	1	1	1	1	1	2	1	1	1	1	1	1	1	1	2	1	1	1	1	1	1	1	1	1	1	1	1	1	1
379	1582	12685117	119957222	119957222_1582	1	1	3	2	4	1	2	1	1	1	1	4	1	1	1	3	1	3	1	1	2	1	4	2	2	1	1	1	1	1	1	2	1	1	1	1	1	1	1
380	437	3507433	120025925	120025925_ 437	2	1	1	1	1	1	1	1	1	1	1	1	1	1	1	1	2	1	1	1	1	1	1	1	3	1	1	1	1	2	2	1	1	1	1	1	2	1	1
381	540	4328800	120026527	120026527_ 540	1	10	1	1	1	1	1	1	1	1	1	1	1	1	1	1	2	1	1	1	1	1	1	1	1	1	2	1	1	1	1	1	1	1	1	1	1	1	1
382	623	4996550	120025345	120025345_ 623	1	1	1	1	3	1	1	1	1	1	1	1	1	1	1	1	2	1	2	1	1	1	1	1	1	2	1	1	1	1	1	1	1	1	1	1	3	1	1
383	722	5796717	120027519	120027519_ 722	1	2	1	1	2	1	1	1	7	1	1	1	1	2	1	1	1	1	3	2	2	1	1	1	2	1	1	1	1	2	1	1	1	1	1	1	1	1	1
384	968	7767100	120035286	120035286_ 968	1	1	2	1	1	2	1	1	1	1	1	1	2	1	1	1	1	1	1	1	1	1	1	1	1	1	1	1	1	1	1	1	1	1	1	1	1	1	1
385	319	2560767	120039719	120039719_ 319	1	1	1	1	1	1	1	1	1	1	1	1	1	1	1	3	4	1	1	1	1	8	1	1	1	1	1	1	1	4	1	1	1	1	1	1	2	2	33
386	287	2304833	120041809	120041809_ 287	38	38	40	1	3	2	1	1	2	2	4	1	28	17	16	10	12	1	50	38	53	12	10	22	49	70	26	20	19	10	84	90	25	24	14	10	128	103	40
387	348	2793517	120041718	120041718_ 348	12	11	13	1	1	1	1	1	1	9	9	3	1	1	1	19	12	1	8	1	12	26	17	33	19	16	11	36	29	22	38	25	14	45	14	31	59	25	18
388	397	3189850	120041191	120041191_ 397	3	3	4	1	1	1	3	1	1	1	6	3	1	1	1	8	4	1	3	1	1	1	2	7	1	1	1	4	11	4	1	3	1	9	4	3	1	1	5
389	424	3407400	120041031	120041031_ 424	63	72	68	30	37	23	56	32	33	42	105	39	1	2	18	123	173	135	38	27	54	130	210	257	2	29	21	169	290	150	27	24	21	157	186	176	28	37	38
390	494	3965233	120041519	120041519_ 494	252	271	269	385	680	551	161	101	155	137	134	61	269	189	208	36	38	33	385	150	383	28	46	43	21	40	28	43	65	35	38	40	22	45	44	39	45	43	41
391	540	4328800	120042145	120042145_ 540	5	1	6	1	8	5	2	1	1	1	1	1	1	3	3	2	1	1	2	1	2	1	1	1	8	3	1	3	1	1	1	1	1	1	1	1	1	2	1
392	555	4453917	120041122	120041122_ 555	17	15	19	1	8	19	2	1	1	3	3	1	11	9	12	15	5	1	44	25	52	11	11	15	88	119	1	21	17	11	77	69	14	27	1	7	77	66	21
393	642	5152350	120041527	120041527_ 642	2	2	3	1	8	4	1	1	1	2	2	1	1	1	1	3	1	1	5	1	3	2	1	1	2	2	1	5	1	1	1	4	1	6	2	1	1	1	1
394	672	5392783	120040466	120040466_ 672	1	2	1	1	5	4	1	1	1	1	2	1	1	1	1	1	1	1	2	1	1	2	1	1	2	1	1	2	1	1	1	4	1	1	2	1	1	1	1
395	670	5377400	120041435	120041435_ 670	1	1	1	1	3	2	1	1	1	1	2	1	1	1	1	1	1	1	2	1	1	1	1	1	1	1	1	1	1	1	1	3	1	1	1	1	1	1	1
396	718	5756350	120041595	120041595_ 718	72	87	87	4	2	3	11	1	1	14	10	4	62	29	52	15	5	1	75	51	81	30	27	46	392	513	119	59	42	23	486	450	165	80	38	35	606	506	254
397	1035	8302033	120041908	120041908_1035	1	2	1	1	1	1	1	1	1	1	2	1	1	1	1	1	1	1	1	1	1	1	1	1	1	1	1	1	1	1	1	1	1	1	1	1	4	1	1
398	1311	10512867	120041344	120041344_1311	2	3	1	1	1	1	1	1	1	1	1	1	1	1	1	2	1	1	3	2	2	1	1	1	1	3	1	1	1	1	1	3	2	1	1	1	5	4	1
399	1346	10791883	120041908	120041908_1346	4	5	6	2	1	1	2	1	1	1	1	1	1	1	3	4	2	1	10	10	12	1	1	2	2	12	2	1	1	1	1	8	2	1	1	1	3	5	2
400	1386	11118950	120041473	120041473_1386	2	1	1	1	2	1	1	1	1	1	1	1	1	1	1	1	2	1	4	1	4	1	1	1	1	1	1	1	1	1	1	2	1	1	1	1	1	1	1
401	744	5966100	120044884	120044884_ 744	1	2	3	3	1	4	5	1	1	1	2	1	1	2	2	1	3	1	4	2	3	1	1	3	1	1	2	1	1	1	1	4	1	1	1	1	3	1	3
402	754	6052650	120045471	120045471_ 754	1	1	2	5	1	1	5	1	1	1	1	1	1	1	1	1	1	1	1	2	4	1	1	1	1	1	1	1	1	1	1	1	1	1	1	1	5	1	1
403	767	6152683	120045425	120045425_ 767	1	1	1	1	1	1	3	1	1	1	1	1	1	1	1	3	1	1	1	2	1	1	1	1	1	1	1	1	1	1	1	1	1	1	1	1	1	1	1
404	793	6362350	120048851	120048851_ 793	10	5	6	4	11	9	12	1	5	1	16	9	11	8	7	8	6	5	6	7	6	9	10	7	10	9	4	8	11	6	5	7	3	6	5	7	7	1	4
405	837	6710717	120047958	120047958_ 837	4	5	2	5	4	3	8	1	3	1	6	3	10	6	4	4	3	1	4	3	1	4	3	8	3	1	2	4	5	1	8	3	1	5	1	2	1	1	5
406	887	7114833	120046173	120046173_ 887	2	1	4	2	1	2	1	1	1	1	2	2	1	1	2	3	1	2	1	1	1	2	1	2	1	1	3	1	2	1	1	3	2	2	1	1	1	1	2
407	104	838533	120053619	120053619_ 104	1	2	1	1	1	1	5	1	5	1	1	1	5	2	1	1	1	1	4	4	5	1	1	1	1	4	3	1	4	1	4	1	1	1	1	1	1	1	8
408	469	3763267	120053955	120053955_ 469	1	1	1	1	1	1	1	1	1	1	2	1	1	2	1	1	1	3	1	1	1	1	4	2	1	1	1	1	1	1	6	1	1	1	3	1	3	1	1
409	960	7695950	120050072	120050072_ 960	1	1	1	1	1	3	1	1	1	1	1	2	3	1	1	2	1	1	1	1	1	1	1	1	1	1	1	1	1	1	1	1	1	1	1	1	1	1	2
410	377	3026350	120072197	120072197_ 377	1	1	2	1	1	1	1	1	1	1	1	1	1	1	1	1	1	5	1	1	1	1	1	1	1	1	1	1	1	1	1	1	1	4	1	1	1	1	1
411	637	5113867	120072739	120072739_ 637	1	1	2	1	1	1	1	1	1	1	1	1	2	1	1	1	2	1	1	1	1	1	11	1	1	1	1	1	1	1	1	1	1	1	2	1	1	1	1
412	440	3530517	120073395	120073395_ 440	1	1	3	1	1	1	4	2	1	2	1	1	1	1	1	1	1	1	1	1	3	1	1	1	1	1	1	1	1	1	1	3	1	1	1	1	1	1	1
413	517	4151817	120077934	120077934_ 517	290	284	270	183	165	129	363	267	258	185	235	173	370	308	269	178	157	152	300	281	354	172	192	226	182	253	231	192	206	165	256	246	224	196	146	181	295	259	260
414	375	3010967	120079437	120079437_ 375	8	8	7	4	3	2	17	12	10	5	8	1	13	15	7	1	2	1	12	10	16	4	1	6	7	6	6	4	1	3	10	11	9	3	1	6	10	9	9
415	397	3189850	120078102	120078102_ 397	25	26	26	20	17	10	32	30	23	18	25	15	27	27	19	13	11	12	20	19	26	12	13	17	12	17	15	14	24	16	18	22	16	15	1	17	21	22	21
416	449	3599767	120077911	120077911_ 449	43	40	42	27	28	13	77	47	46	26	38	22	63	47	40	29	22	25	51	45	61	22	27	38	23	41	42	35	34	22	39	48	40	31	17	22	51	43	40
417	496	3980617	120078125	120078125_ 496	35	41	34	2	1	1	70	37	32	19	34	20	45	49	30	20	17	20	30	31	46	20	22	32	18	37	38	1	30	20	36	46	38	29	20	23	56	55	52
418	563	4515467	120078163	120078163_ 563	105	114	108	66	56	47	198	100	119	67	91	54	181	127	119	54	50	49	140	109	167	48	60	65	66	110	88	68	65	51	96	123	109	62	41	49	141	114	118
419	584	4686750	120078194	120078194_ 584	1	1	1	1	1	1	6	1	1	1	2	1	4	1	1	4	1	1	1	1	5	1	1	2	1	1	2	1	1	2	1	4	1	1	2	1	3	6	1
420	636	5106167	120078186	120078186_ 636	20	26	25	28	28	17	100	52	54	1	38	11	44	27	58	25	7	11	31	29	37	26	31	16	11	29	16	36	38	22	20	24	22	13	25	15	29	23	30
421	617	4950383	120078339	120078339_ 617	84	80	83	39	44	26	148	77	82	47	59	38	130	103	87	49	38	36	106	79	110	37	40	56	48	85	69	50	62	41	74	93	68	52	40	47	101	92	93
422	639	5129267	120078018	120078018_ 639	1	1	1	11	14	8	47	1	26	1	15	1	1	1	27	10	1	1	1	1	1	8	1	1	1	1	1	11	14	10	1	1	1	1	11	1	1	1	1
423	1074	8611733	120085045	120085045_1074	7	6	5	5	1	5	6	4	1	3	4	1	1	7	4	2	1	5	5	6	2	1	6	4	1	7	4	4	9	6	2	6	1	7	1	2	8	4	1
424	719	5764050	120353302	120353302_ 719	1	1	1	1	1	1	1	1	1	1	1	1	1	1	1	1	1	1	1	1	1	1	1	1	22	32	1	1	1	1	31	23	1	1	1	1	42	30	1
425	425	3415100	121026848	121026848_ 425	52	49	53	25	29	16	1	28	27	35	83	28	1	1	1	100	138	115	27	1	38	107	166	181	1	24	1	140	215	122	1	1	19	126	140	141	23	1	28
426	624	5004233	121025726	121025726_ 624	1	5	1	1	1	1	8	4	6	1	4	1	1	1	1	10	16	10	2	1	6	8	15	19	1	1	1	9	21	5	1	1	1	6	14	13	3	1	1
427	666	5346617	121026070	121026070_ 666	1	4	5	5	8	1	10	4	6	5	6	4	3	1	1	14	14	14	5	1	4	11	20	23	2	1	1	15	32	13	1	3	1	13	14	16	3	3	3
428	561	4500083	121029594	121029594_ 561	1	1	1	1	1	1	1	1	1	3	1	1	1	1	1	5	4	5	1	1	1	8	2	10	1	1	1	10	19	7	2	1	1	1	5	1	4	1	1
429	568	4553950	121026344	121026344_ 568	1	1	1	1	1	1	1	1	1	2	1	1	1	1	1	2	1	3	1	1	1	1	1	7	1	1	1	6	7	1	1	1	1	1	1	1	1	1	1
430	110	884700	121038704	121038704_ 110	5	1	7	3	3	1	3	1	1	8	1	2	1	1	1	1	1	2	1	1	1	1	1	1	1	1	3	1	1	1	1	1	1	1	1	1	1	2	1
431	288	2312533	121047028	121047028_ 288	1	1	1	1	1	1	1	1	1	1	1	1	1	1	1	1	1	1	1	2	4	1	1	1	4	6	1	1	1	1	6	5	3	1	1	1	10	7	1
432	392	3151383	121048042	121048042_ 392	2	1	1	1	1	1	1	1	1	1	1	1	1	1	1	1	1	1	1	1	3	1	5	1	1	1	1	3	1	1	4	1	1	2	1	1	6	1	1
433	494	3965233	121045708	121045708_ 494	19	25	24	33	58	56	13	6	12	10	8	7	1	19	14	3	5	5	38	14	34	1	5	1	1	1	1	1	5	4	1	4	2	5	6	4	4	1	1
434	551	4423133	121048279	121048279_ 551	2	1	1	1	1	1	1	1	1	1	1	1	1	1	1	1	1	1	1	1	1	1	1	1	1	6	1	1	1	1	1	7	1	1	1	1	1	7	1
435	718	5756350	121046974	121046974_ 718	1	7	1	1	1	1	4	1	1	1	1	1	3	1	2	1	1	1	7	1	9	3	1	1	30	42	12	6	1	1	38	38	14	1	1	1	51	37	25
436	109	877000	121057480	121057480_ 109	1	1	1	1	1	1	1	1	1	1	1	1	2	1	1	1	1	1	1	1	4	1	1	1	1	1	3	1	1	1	1	1	1	1	1	1	1	1	1
437	412	3305467	121061501	121061501_ 412	497	492	499	482	465	348	1167	731	789	478	634	404	1069	839	765	479	428	464	919	801	1031	430	534	633	468	764	670	583	664	10	16	749	688	553	413	8	16	820	860
438	487	3911367	121061737	121061737_ 487	1	1	1	1	1	1	9	3	1	1	1	1	6	1	1	1	1	2	1	1	5	1	1	4	1	1	5	1	1	1	1	4	1	2	1	1	1	1	5
439	499	4003700	121063141	121063141_ 499	1	1	1	1	1	1	1	1	1	1	1	1	3	1	1	1	1	1	1	1	1	1	1	1	1	1	2	1	1	1	1	1	1	1	1	1	1	1	4
440	539	4321100	121062935	121062935_ 539	1	1	1	2	1	1	1	1	1	1	1	1	1	1	1	1	1	2	1	6	7	1	1	1	4	1	3	1	3	1	1	5	1	1	1	1	1	1	1
441	801	6423900	121062263	121062263_ 801	3	3	1	1	1	1	1	1	1	1	1	1	1	1	1	1	1	1	1	1	1	1	1	1	1	1	2	3	1	1	1	1	1	1	1	1	2	1	1
442	840	6733800	121062302	121062302_ 840	142	129	129	110	148	104	136	86	95	103	125	133	166	128	131	111	117	98	106	107	98	130	129	134	55	123	83	110	147	91	85	92	63	111	81	96	93	113	89
443	1045	8378983	121060921	121060921_1045	3	5	5	1	1	1	1	1	1	1	4	1	1	1	1	1	4	5	1	1	1	1	3	1	1	1	1	1	2	1	1	1	1	1	1	5	1	1	1
444	1005	8061500	121063026	121063026_1005	1	2	1	1	1	1	1	1	1	1	1	1	1	1	1	1	1	2	1	1	1	1	5	1	1	1	1	1	2	1	1	1	1	1	1	1	1	1	1
445	1168	9364133	121060516	121060516_1168	3	1	1	1	1	1	1	1	1	1	2	1	1	1	1	1	1	1	4	1	1	1	1	1	1	1	1	2	3	1	1	2	1	1	1	1	1	1	1
446	380	3049433	121066757	121066757_ 380	1	1	2	1	1	1	1	7	1	1	1	1	1	4	5	1	1	6	1	1	8	1	1	6	1	1	4	1	10	1	2	1	1	1	7	1	1	1	1
447	943	7565033	121067505	121067505_ 943	2	1	1	1	2	1	1	1	1	1	2	1	1	1	1	1	1	1	1	1	1	1	1	1	1	1	1	1	2	1	1	1	1	1	1	1	1	1	1
448	467	3747883	121076416	121076416_ 467	6	1	1	3	1	1	1	3	5	1	1	2	5	8	6	2	1	2	6	19	1	1	3	3	1	1	6	3	7	2	1	6	5	5	2	1	7	5	6
449	617	4950383	121079811	121079811_ 617	11	9	4	3	3	1	12	7	7	5	7	5	12	7	1	5	3	1	1	9	11	1	1	1	1	8	4	1	2	1	9	3	4	3	1	1	9	1	9
450	397	3189850	121082428	121082428_ 397	2	4	1	1	1	1	1	1	1	1	1	1	1	1	1	1	1	1	1	3	1	1	1	1	1	1	1	1	1	1	1	1	1	1	1	1	2	3	2
451	518	4159500	121082367	121082367_ 518	27	24	26	21	4	12	33	21	23	21	24	16	30	28	22	16	17	15	28	27	40	16	10	21	17	25	25	22	26	17	20	23	19	15	14	1	26	11	25
452	690	5531300	121088928	121088928_ 690	1	4	1	1	1	1	1	1	1	1	1	1	1	1	1	1	1	1	1	1	1	1	1	1	1	1	1	1	4	1	1	1	1	1	1	1	1	1	3
453	883	7084050	121088173	121088173_ 883	1	1	1	1	1	1	1	1	1	1	2	1	1	1	1	2	1	1	1	1	1	1	4	1	1	1	1	1	1	1	1	1	1	1	4	1	1	1	1
454	1200	9619967	121088287	121088287_1200	1	1	5	1	1	1	1	1	1	1	2	1	3	1	1	2	1	1	1	1	1	1	1	4	1	1	1	1	1	1	1	2	1	1	1	1	1	1	1
455	1292	10366567	121086746	121086746_1292	1	1	1	1	1	1	4	1	1	1	1	1	1	1	1	5	1	1	1	1	1	1	1	1	1	1	1	1	1	1	2	5	1	1	1	1	2	1	1
456	1449	11623116	121088394	121088394_1449	2	1	1	1	1	1	1	1	6	1	1	1	1	1	15	1	1	1	2	1	1	8	1	1	1	1	1	1	1	1	1	2	1	1	1	1	1	1	1
457	617	4950383	121085365	121085365_ 617	1	4	8	1	3	1	1	1	1	1	1	1	1	1	1	1	1	4	10	1	1	1	1	5	1	1	1	1	6	1	1	1	1	1	1	1	1	1	8
458	803	6439300	121095680	121095680_ 803	3	1	1	3	1	1	1	1	1	1	4	1	1	1	1	4	1	5	1	1	1	2	1	1	1	1	1	1	1	1	1	1	1	1	1	1	1	1	1
459	1380	11063200	121095619	121095619_1380	5	1	9	7	1	1	1	9	19	1	1	1	1	1	1	1	1	1	1	1	1	1	1	1	1	1	1	1	1	1	16	1	1	1	1	1	15	1	1
460	1390	11149734	121096481	121096481_1390	7	1	9	14	1	1	3	10	27	1	1	1	1	1	1	1	1	1	1	1	1	9	1	3	1	1	1	1	28	1	23	2	2	2	1	2	22	1	2
461	615	4934983	121097595	121097595_ 615	1	1	1	2	3	1	1	1	1	1	2	1	1	1	1	2	1	1	1	1	1	1	2	1	1	1	1	1	5	1	1	1	1	1	1	1	1	1	1
462	686	5500517	121099365	121099365_ 686	4	7	7	3	4	4	1	1	1	2	3	1	1	1	1	8	1	3	3	3	1	8	11	9	1	3	1	12	10	10	2	1	3	17	9	14	4	4	5
463	756	6068033	121098915	121098915_ 756	2	1	1	6	3	3	1	1	1	4	5	2	1	1	1	2	1	3	2	1	1	1	2	1	1	1	1	3	5	1	1	1	1	4	2	1	1	1	1
464	862	6912683	121097878	121097878_ 862	4	4	5	7	4	4	1	1	1	1	4	6	1	1	1	5	1	5	2	1	1	4	4	9	1	3	1	7	7	6	1	2	1	8	4	6	1	2	1
465	880	7060884	121098183	121098183_ 880	2	4	1	1	2	2	1	1	1	1	2	1	1	1	1	3	1	1	1	1	1	1	2	1	1	1	1	1	1	1	1	1	1	2	1	5	1	1	1
466	895	7176400	121099922	121099922_ 895	6	8	4	3	2	2	3	3	1	1	3	3	4	3	1	3	4	4	2	1	1	1	4	6	1	1	2	5	7	1	1	1	1	7	1	5	3	3	5
467	982	7874833	121099968	121099968_ 982	9	6	8	1	1	1	1	1	1	1	1	6	2	1	1	2	1	1	1	1	1	4	1	3	1	1	1	1	1	1	1	2	1	1	2	1	2	1	2
468	1044	8371300	121098129	121098129_1044	12	14	1	1	3	2	1	1	1	1	2	1	2	1	1	2	5	5	1	1	1	9	1	6	1	1	1	1	1	6	1	1	1	1	5	1	1	1	3
469	1116	8954217	121100159	121100159_1116	6	9	5	1	1	1	1	1	1	1	1	1	1	1	1	1	1	1	1	1	1	1	1	1	1	1	1	1	1	1	1	1	1	1	1	1	1	1	1
470	1138	9123500	121098648	121098648_1138	70	78	77	17	23	10	30	30	16	31	28	31	41	46	36	28	29	34	23	22	23	72	24	31	11	32	14	21	29	31	16	46	13	43	13	16	20	14	13
471	1145	9186967	121099586	121099586_1145	45	25	31	1	1	1	35	36	1	1	3	3	2	31	1	3	1	1	1	12	1	21	1	1	1	1	1	1	1	1	1	2	1	1	1	10	1	1	1
472	1207	9683416	121099289	121099289_1207	21	18	21	4	1	1	1	1	1	1	1	2	10	8	6	2	1	2	1	1	1	88	1	1	1	1	1	1	8	2	2	2	1	1	1	1	2	1	2
473	1272	10203067	121099739	121099739_1272	105	1	1	7	3	1	1	6	5	9	14	11	14	1	13	2	3	2	1	1	1	31	1	1	1	1	1	1	1	1	1	3	1	2	1	2	6	1	3
474	1289	10333883	121098526	121098526_1289	102	102	113	17	7	10	18	15	21	24	53	73	38	30	32	1	9	10	8	1	13	119	10	11	3	3	6	10	29	1	14	9	5	10	7	14	15	10	11
475	1466	11754033	121099312	121099312_1466	11	1	10	11	10	4	17	10	12	1	9	1	8	4	1	10	7	8	5	8	1	3	5	7	1	11	2	5	6	5	8	6	1	3	1	13	8	5	9
476	412	3305467	121374504	121374504_ 412	39	26	29	1	24	19	199	63	76	25	60	1	159	83	75	28	22	1	109	77	144	1	33	52	24	67	51	42	42	1	1	65	56	37	1	1	1	73	127
477	1528	12250400	121957085	121957085_1528	1	1	1	1	1	1	3	1	1	1	1	1	1	1	1	1	1	1	1	1	1	1	1	1	1	1	1	1	1	3	1	3	1	1	1	1	1	1	1
478	1412	11328716	121960304	121960304_1412	1	1	1	1	2	1	2	2	1	1	1	1	1	1	1	1	1	1	1	1	1	1	1	1	1	1	1	1	1	1	1	1	1	1	1	1	1	1	1
479	1540	12352333	121965935	121965935_1540	1	1	1	1	3	1	2	3	1	1	1	1	3	3	4	2	1	1	1	1	6	1	1	3	1	1	4	1	3	1	1	2	3	1	3	1	2	1	2
480	1386	11118950	121968010	121968010_1386	1	1	1	1	1	1	2	3	1	1	1	2	1	1	1	1	1	1	1	1	1	1	1	1	1	1	2	1	1	1	1	1	1	1	1	1	1	1	1
481	646	5183116	122018242	122018242_ 646	1	1	2	1	1	1	1	1	1	1	1	1	1	1	1	1	1	1	1	1	1	1	1	2	1	1	1	1	2	1	1	1	1	1	1	1	1	1	1
482	1644	13181483	122017433	122017433_1644	1	1	1	1	2	1	1	1	2	1	1	1	1	1	1	1	1	1	2	1	1	1	1	1	2	1	1	1	1	1	1	1	1	1	1	2	1	3	1
483	396	3182150	122031326	122031326_ 396	1	1	1	1	1	1	1	1	1	1	1	1	1	1	1	1	1	1	1	1	1	1	1	1	1	1	1	1	1	9	2	1	1	1	1	5	1	1	1
484	840	6733800	122061203	122061203_ 840	1	1	1	1	1	1	1	1	1	1	1	1	1	1	10	1	1	1	1	1	1	1	9	5	1	12	1	1	1	7	1	1	1	1	1	1	1	1	1
485	94	761583	122059097	122059097_ 94	1	3	1	2	1	1	6	6	1	1	1	1	6	1	4	1	1	1	1	3	1	1	1	3	1	1	1	1	1	1	3	5	2	2	2	2	1	4	1
486	108	869300	122060905	122060905_ 108	12	9	9	8	9	4	22	10	13	1	14	5	12	13	11	9	1	7	1	13	4	9	14	15	3	16	11	4	19	12	17	5	8	13	10	14	16	23	17
487	634	5090783	122059456	122059456_ 634	4	4	1	1	1	1	1	1	3	1	1	1	6	1	1	2	1	1	1	3	3	1	1	1	1	1	1	1	2	1	1	1	1	1	1	1	1	1	1
488	815	6541333	122058067	122058067_ 815	5	1	1	1	4	1	6	1	1	1	1	2	1	1	3	4	5	11	4	1	1	7	7	13	1	3	1	7	9	1	3	1	1	7	1	7	4	1	3
489	1324	10622500	122058914	122058914_1324	1	1	1	2	1	1	1	1	9	1	1	1	1	1	1	1	1	1	1	1	1	1	1	1	1	1	1	1	7	1	1	1	1	1	1	1	1	1	1
490	398	3197550	122068916	122068916_ 398	5	4	5	1	1	1	7	1	9	1	1	1	18	15	8	2	1	1	4	7	9	1	1	1	9	14	12	7	5	1	8	9	16	1	4	1	14	32	35
491	386	3095617	122067017	122067017_ 386	1	1	1	1	1	1	3	1	1	1	1	1	1	1	1	1	1	1	1	1	1	1	1	1	1	1	2	1	2	1	1	1	1	1	1	1	1	1	1
492	401	3220633	122067253	122067253_ 401	1	1	1	1	1	1	13	1	1	1	1	1	4	1	2	1	1	1	1	1	3	1	1	1	2	1	6	1	2	1	1	3	7	1	5	1	2	17	20
493	412	3305467	122066574	122066574_ 412	49	44	47	44	41	30	139	70	76	40	56	41	116	86	69	41	39	42	95	78	120	33	45	60	41	67	63	58	63	1	14	81	61	46	37	1	20	77	81
494	475	3809433	122066071	122066071_ 475	3	1	1	1	1	1	8	1	1	1	1	1	1	1	1	1	1	2	1	1	3	1	1	3	1	1	1	1	4	1	7	7	6	1	3	1	9	23	14
495	842	6758783	122065178	122065178_ 842	12	12	8	10	9	8	10	6	8	1	11	11	14	7	1	10	8	1	9	1	8	8	1	1	1	3	6	7	1	1	6	1	7	9	5	9	5	8	1
496	116	930867	122070160	122070160_ 116	1	1	1	1	1	1	1	1	2	1	1	1	1	1	1	1	1	1	1	1	1	1	1	1	1	1	1	1	3	1	3	1	1	1	1	1	1	1	1
497	109	877000	122088074	122088074_ 109	1	1	1	1	1	1	1	1	1	1	1	1	1	1	1	2	1	2	1	2	1	1	1	1	1	1	1	1	1	1	1	1	1	1	1	1	1	1	1
498	564	4523167	122090973	122090973_ 564	6	1	7	1	1	1	7	7	1	5	6	1	6	3	6	8	8	1	8	5	9	4	5	9	1	5	7	8	7	1	1	6	1	4	4	1	1	4	3
499	1542	12367717	122092506	122092506_1542	1	2	1	1	1	3	1	1	1	1	1	1	1	1	1	2	1	1	1	1	1	1	1	1	1	1	1	1	1	1	2	2	1	3	2	3	1	1	1
500	1137	9115800	122102570	122102570_1137	7	1	8	1	1	1	1	4	1	1	1	1	1	1	4	2	3	2	1	1	1	9	4	3	1	1	1	1	1	1	1	4	1	1	1	1	1	1	1
501	1272	10203067	122104019	122104019_1272	11	13	12	1	1	1	1	1	1	1	4	7	1	2	3	1	1	1	1	1	1	13	1	1	1	1	1	1	3	1	1	1	1	1	1	1	1	1	1
502	1290	10341583	122106728	122106728_1290	10	9	12	1	1	1	1	1	2	1	1	1	1	1	1	1	1	1	1	1	1	9	1	1	1	1	1	1	1	1	1	1	1	1	1	1	1	1	1
503	1557	12483150	122922974	122922974_1557	11	1	9	8	5	5	7	10	5	4	7	9	1	1	8	9	6	7	8	11	1	4	4	7	10	6	5	8	9	11	10	8	11	10	8	10	8	7	9
504	1624	13027583	122962456	122962456_1624	3	1	2	6	4	9	1	9	6	11	3	4	1	2	8	1	3	1	1	2	2	2	1	1	3	1	2	1	1	1	4	2	1	2	4	1	1	3	1
505	1681	13485383	122960098	122960098_1681	1	1	1	1	1	1	1	1	1	2	1	1	1	1	3	1	1	1	1	1	1	1	1	1	1	1	1	1	1	1	1	2	1	1	1	1	1	1	1
506	806	6462383	123027878	123027878_ 806	2	1	3	2	1	1	1	1	1	1	1	1	1	2	1	1	1	1	1	1	1	1	1	1	1	1	1	1	1	1	1	1	1	3	2	1	1	1	1
507	91	738400	123034508	123034508_ 91	1	4	1	1	1	1	1	1	1	1	1	1	1	1	1	7	1	1	1	1	1	1	1	6	1	1	1	1	1	1	1	1	1	1	1	1	1	1	1
508	459	3686317	123037720	123037720_ 459	1	1	1	1	1	1	1	1	1	1	1	2	1	2	1	3	1	1	1	1	1	1	1	1	1	1	1	2	1	1	1	1	2	1	1	1	1	1	1
509	578	4640584	123037186	123037186_ 578	3	1	1	1	2	1	1	1	1	1	1	1	1	1	1	3	2	1	2	1	1	2	1	1	1	1	2	1	1	1	1	1	1	1	2	1	1	1	1
510	659	5283150	123037514	123037514_ 659	1	1	1	1	1	1	1	1	1	1	1	1	2	1	1	3	2	1	1	1	1	2	1	1	1	2	2	1	1	1	1	1	1	1	2	1	1	1	1
511	670	5377400	123039558	123039558_ 670	1	1	1	3	1	1	2	1	1	1	3	2	3	2	2	4	2	1	2	2	1	2	1	1	2	2	2	2	1	1	2	1	3	1	2	1	3	3	1
512	697	5594750	123039055	123039055_ 697	1	1	1	2	1	1	1	1	1	1	1	3	2	1	1	3	1	1	1	2	1	1	1	1	1	1	1	1	3	1	1	1	1	1	2	1	1	1	1
513	777	6229633	123040344	123040344_ 777	1	1	2	2	2	1	1	2	1	1	3	2	3	1	2	2	1	1	1	1	1	1	4	6	2	2	1	5	6	7	1	1	1	3	4	8	1	2	1
514	900	7214867	123039406	123039406_ 900	2	1	1	3	1	1	1	1	1	1	1	1	2	2	1	4	1	1	1	1	1	1	1	1	1	2	1	2	2	1	2	1	2	1	2	2	1	1	1
515	892	7153316	123038536	123038536_ 892	1	1	1	3	1	1	1	2	1	1	1	2	2	2	1	2	3	1	1	1	1	1	2	2	1	1	1	2	1	1	1	1	2	1	3	1	1	1	1
516	1042	8355900	123038757	123038757_1042	1	1	1	2	1	1	1	2	1	1	2	1	1	1	1	1	1	1	2	1	1	1	1	2	2	2	3	1	1	1	3	1	2	1	2	1	1	1	3
517	1124	9015767	123041306	123041306_1124	1	1	1	3	1	1	1	2	1	1	2	1	1	3	1	2	1	1	1	1	1	1	1	1	2	1	1	1	1	1	1	1	2	1	2	1	1	1	1
518	1131	9069633	123038910	123038910_1131	1	1	1	2	1	1	1	1	1	1	1	1	1	1	1	1	1	1	1	1	1	1	1	1	2	1	1	1	1	1	1	1	2	1	1	1	1	1	1
519	1574	12623550	123038834	123038834_1574	23	26	23	23	24	22	21	23	22	21	23	21	23	19	22	29	24	21	4	16	20	28	23	22	25	24	25	23	19	20	21	27	22	25	20	26	25	31	21
520	1580	12669717	123041595	123041595_1580	1	1	10	7	3	1	1	3	2	12	5	2	3	4	3	3	1	1	5	3	1	2	3	1	3	5	2	4	4	1	6	1	2	7	5	4	1	1	1
521	1592	12771650	123038918	123038918_1592	1	1	3	3	2	1	1	2	1	1	3	2	3	2	4	3	1	1	1	5	1	1	1	1	1	3	1	2	3	1	1	1	3	3	4	1	1	1	1
522	1617	12964133	123041191	123041191_1617	1	1	1	3	1	1	1	2	1	1	3	2	2	2	1	1	1	1	1	3	1	1	1	1	1	2	1	2	4	1	1	1	1	2	3	1	1	1	1
523	116	930867	123054077	123054077_ 116	10	11	11	2	5	11	1	6	4	14	11	4	6	9	2	3	2	1	2	3	7	2	9	3	4	4	4	6	10	3	1	4	2	3	8	1	9	5	6
524	136	1094550	123052895	123052895_ 136	13	1	11	1	4	6	1	1	2	13	12	3	1	7	1	1	2	1	1	3	8	1	1	3	1	1	1	3	8	3	1	1	1	1	3	1	6	1	4
525	461	3701700	123058174	123058174_ 461	1	1	1	1	1	1	1	1	1	1	1	1	1	3	1	1	1	1	1	1	1	2	1	1	1	1	1	1	2	1	1	1	1	1	1	1	1	1	1
526	683	5477433	123053223	123053223_ 683	1	1	1	1	1	1	1	1	1	1	2	2	1	1	1	3	1	1	1	1	2	1	1	1	1	1	1	1	1	1	1	1	1	1	1	9	1	3	1
527	758	6083433	123051994	123051994_ 758	1	1	1	1	5	1	1	4	1	1	4	1	2	1	1	3	1	1	1	1	2	2	1	1	1	1	1	1	1	1	1	1	1	1	1	1	2	1	1
528	1004	8053817	123052727	123052727_1004	1	1	1	1	1	1	1	1	1	1	1	1	1	2	1	1	1	1	1	1	1	1	1	2	1	3	1	1	1	1	3	1	1	1	1	1	1	1	2
529	1547	12406200	123053726	123053726_1547	8	1	1	1	4	5	3	4	3	3	3	4	1	3	1	4	5	1	4	1	1	5	1	3	4	2	2	6	3	1	5	1	2	3	3	1	2	1	6
530	383	3072533	123066147	123066147_ 383	2	1	1	2	1	1	2	1	1	1	2	1	1	1	1	1	3	1	2	2	1	1	1	8	1	1	1	2	1	1	7	1	1	3	1	1	2	4	5
531	572	4594316	123068657	123068657_ 572	1	1	1	1	3	1	3	1	6	1	1	1	1	1	2	1	1	1	1	1	9	1	1	1	1	1	2	12	1	1	2	1	2	1	1	1	1	1	2
532	1323	10614800	123060463	123060463_1323	1	1	1	2	2	2	1	2	6	1	1	1	1	1	1	1	1	1	1	1	1	2	1	1	1	1	1	1	1	1	1	1	1	1	1	1	1	1	1
533	1384	11103567	123061417	123061417_1384	1	1	1	1	1	1	1	1	1	1	1	1	1	1	1	1	2	2	1	1	1	1	1	1	1	1	1	1	1	1	1	1	1	1	2	1	1	1	1
534	1547	12406200	123061119	123061119_1547	1	1	1	2	1	1	1	1	1	1	1	1	3	1	1	1	1	1	1	1	1	1	1	1	1	1	1	1	1	5	1	1	1	1	1	1	1	1	1
535	108	869300	123079079	123079079_ 108	7	7	1	1	1	1	11	2	7	1	1	1	10	1	6	3	6	2	12	10	1	3	4	1	1	1	1	5	1	1	13	9	18	6	1	5	1	16	15
536	179	1435117	123079323	123079323_ 179	1	1	1	1	1	1	1	2	1	1	1	1	1	3	1	1	1	1	2	1	1	1	1	1	1	1	1	1	1	1	1	2	1	1	1	1	1	1	1
537	286	2297150	123077843	123077843_ 286	3	3	1	1	1	1	2	2	3	1	1	1	5	2	1	3	1	1	2	1	1	1	1	1	1	1	3	1	1	1	4	4	1	1	1	1	4	6	2
538	347	2785817	123076576	123076576_ 347	152	145	147	7	5	5	419	240	247	15	11	8	385	293	290	12	5	6	219	197	214	24	19	32	106	195	220	49	44	18	200	238	230	65	37	21	265	286	294
539	375	3010967	123076721	123076721_ 375	1	5	1	1	1	1	7	3	6	1	1	1	7	6	4	1	1	3	6	4	1	1	1	1	1	1	3	3	1	2	1	9	6	1	2	1	10	1	15
540	387	3103300	123076843	123076843_ 387	1	1	1	1	1	1	1	1	3	1	1	1	1	4	3	1	1	1	2	1	1	1	1	1	1	1	1	1	1	1	1	7	1	1	1	1	1	1	1
541	398	3197550	123077736	123077736_ 398	31	30	21	1	1	1	59	32	28	4	9	1	43	32	27	3	1	1	30	34	37	10	1	1	15	35	28	15	16	10	33	37	35	19	10	7	45	40	38
542	456	3663233	123078308	123078308_ 456	6	4	1	1	1	1	33	9	4	1	1	1	7	5	9	1	1	1	10	6	11	1	2	1	6	10	1	4	1	1	3	8	1	3	5	1	8	1	7
543	446	3576683	123078011	123078011_ 446	3	1	1	1	1	1	12	1	1	1	1	1	3	1	1	1	1	1	1	8	1	1	1	1	1	3	1	1	1	1	5	4	1	1	1	1	2	1	7
544	470	3770967	123076866	123076866_ 470	51	58	49	1	1	1	131	61	78	1	1	1	203	148	119	9	3	4	38	46	71	35	28	40	71	129	114	60	47	16	99	163	125	66	40	10	81	173	125
545	506	4057567	123077774	123077774_ 506	1	7	1	1	1	1	1	3	1	1	1	1	1	1	1	1	1	1	8	6	8	1	1	1	1	1	1	1	1	1	1	13	1	1	1	1	1	1	10
546	508	4072967	123078392	123078392_ 508	1	1	1	1	1	1	14	6	10	1	1	1	14	10	6	1	1	1	1	6	1	1	1	1	1	1	7	7	3	1	4	15	7	6	1	1	1	20	18
547	572	4594316	123076820	123076820_ 572	13	10	12	2	1	1	12	1	6	5	5	4	42	27	20	3	3	2	3	5	1	7	1	4	8	29	19	1	12	2	17	43	34	6	1	1	14	30	19
548	684	5485133	123079285	123079285_ 684	6	6	10	4	4	1	1	1	1	10	9	5	3	1	4	12	8	13	3	1	1	9	8	8	1	1	1	13	10	7	1	4	1	1	7	1	7	1	1
549	758	6083433	123078751	123078751_ 758	1	1	1	5	5	1	1	1	1	3	3	1	1	1	1	2	1	2	1	1	1	1	2	4	1	1	1	1	2	2	1	1	1	2	1	1	1	2	1
550	828	6641450	123080933	123080933_ 828	1	1	1	3	3	1	1	1	1	1	1	1	1	1	1	3	3	2	1	1	1	1	1	5	1	1	1	4	2	3	1	1	1	1	3	1	1	1	1
551	1010	8099983	123079910	123079910_1010	1	1	1	1	1	1	1	1	1	1	1	1	1	1	1	1	1	1	1	1	1	1	2	4	1	1	1	1	1	2	1	1	1	1	1	1	1	1	1
552	1319	10574417	123081734	123081734_1319	1	1	1	1	1	1	1	1	6	1	1	1	1	1	1	1	1	1	1	1	1	3	1	1	1	1	1	1	6	2	1	1	1	1	1	1	1	1	3
553	1335	10707133	123079697	123079697_1335	1	1	1	1	1	1	1	1	5	1	1	1	1	1	1	1	1	1	1	1	1	2	1	1	1	1	1	1	5	1	1	1	1	1	1	1	1	1	1
554	626	5019633	123085243	123085243_ 626	1	1	1	1	1	1	1	1	1	1	1	1	1	1	1	2	2	1	1	1	1	1	1	2	1	1	1	1	1	1	1	1	1	1	2	1	1	1	1
555	759	6091133	123092178	123092178_ 759	1	3	1	1	1	1	1	1	1	1	1	1	1	1	1	2	1	1	1	1	1	3	1	1	1	1	1	1	1	1	1	1	1	1	1	1	1	1	1
556	1226	9829717	123109566	123109566_1226	1	8	1	1	1	1	1	1	1	1	1	1	1	1	1	3	1	1	1	1	1	1	1	1	1	1	1	1	1	1	1	3	1	1	1	1	1	1	1
557	109	877000	123109665	123109665_ 109	1	1	1	1	1	1	1	1	1	1	2	1	1	1	1	1	1	1	1	1	1	1	1	2	1	3	1	1	1	1	1	1	1	1	1	1	1	3	1
558	440	3530517	123114090	123114090_ 440	4	5	1	1	1	1	4	1	3	1	5	2	1	1	1	1	1	3	4	2	1	2	1	6	1	1	1	2	1	1	1	2	1	1	1	1	1	5	1
559	528	4236450	123112740	123112740_ 528	1	1	1	1	2	1	1	1	1	1	6	4	1	1	1	2	3	4	1	1	1	1	1	1	1	1	1	1	1	1	1	1	1	1	2	1	1	1	1
560	574	4609700	123113251	123113251_ 574	1	1	1	1	1	1	1	1	1	1	2	1	1	1	1	2	1	1	1	1	1	1	1	1	1	1	1	1	2	1	1	1	1	1	1	1	1	1	1
561	683	5477433	123114227	123114227_ 683	21	3	29	14	12	10	1	1	3	32	42	28	17	10	11	45	35	33	21	12	19	36	45	41	6	1	10	44	49	28	14	17	11	37	30	37	17	20	13
562	700	5617833	123112442	123112442_ 700	1	1	1	1	1	1	1	1	1	1	3	2	1	1	1	5	3	4	4	1	1	1	4	6	1	1	1	5	1	1	1	1	1	8	3	1	1	1	1
563	781	6270017	123113518	123113518_ 781	4	1	1	5	3	6	1	1	1	4	6	1	1	1	1	5	4	4	1	1	2	6	5	10	1	1	1	8	8	7	1	2	1	15	9	8	3	4	1
564	895	7176400	123114502	123114502_ 895	2	4	3	2	7	6	4	1	1	5	5	5	1	1	1	3	1	3	1	2	1	1	1	3	1	1	1	1	1	1	1	1	1	1	1	1	1	1	1
565	926	7424634	123111053	123111053_ 926	3	1	1	1	1	1	1	1	1	1	1	1	1	1	1	3	1	2	1	1	1	1	1	1	1	1	1	4	1	1	1	1	1	6	1	3	1	1	1
566	1051	8434750	123112045	123112045_1051	1	2	1	1	1	1	1	1	1	1	4	2	1	1	1	3	1	2	2	1	1	1	1	1	1	1	1	1	1	1	1	2	1	1	1	1	1	1	1
567	1044	8371300	123114449	123114449_1044	11	11	12	2	1	1	1	1	3	1	4	4	1	1	3	35	30	21	6	3	1	12	8	48	1	1	1	5	13	4	1	2	1	1	3	4	1	1	1
568	1137	9115800	123110672	123110672_1137	29	33	29	1	1	1	1	1	1	1	2	1	1	1	1	2	1	1	1	1	1	17	2	1	1	1	1	1	1	1	1	1	1	1	1	1	1	1	1
569	1152	9240916	123112236	123112236_1152	2	14	1	1	1	1	1	1	1	1	1	1	1	1	2	2	1	1	1	1	1	8	1	1	1	1	1	1	1	1	1	1	1	1	1	1	1	1	1
570	1289	10333883	123113930	123113930_1289	59	58	58	11	13	7	13	7	21	10	22	31	14	11	16	8	8	4	5	4	3	73	6	7	1	5	3	8	27	2	14	4	4	2	1	1	7	4	4
571	1325	10630183	123112694	123112694_1325	1	1	1	6	1	1	1	1	1	1	4	1	1	1	1	3	1	4	1	1	1	1	1	1	1	1	1	1	1	1	1	2	1	1	1	1	1	1	1
572	1375	11024716	123110573	123110573_1375	1	1	1	3	1	1	1	1	1	1	1	1	1	1	1	4	1	1	1	1	1	1	1	1	1	1	1	1	1	1	1	3	1	1	1	1	1	1	1
573	821	6587584	123114395	123114395_ 821	1	1	1	3	1	5	1	1	1	1	1	1	1	1	1	7	1	3	1	1	1	1	1	5	1	1	1	1	1	3	1	1	1	4	1	1	1	1	1
574	1164	9333350	123116852	123116852_1164	44	39	39	7	1	1	1	3	13	2	1	4	15	12	10	1	1	3	1	2	1	95	4	1	1	6	1	1	10	3	2	4	1	1	2	1	2	3	1
575	1314	10535950	123116333	123116333_1314	4	4	1	14	1	1	1	7	18	4	8	4	12	1	7	9	6	3	1	1	1	10	1	1	1	6	3	2	27	1	8	5	3	1	1	1	10	1	4
576	1394	11180516	123116478	123116478_1394	1	5	1	18	1	3	3	11	27	1	2	4	1	1	5	3	3	3	1	1	2	5	1	1	1	1	1	3	28	1	25	4	2	1	1	1	17	1	4
577	1461	11715550	123115135	123115135_1461	1	1	1	1	1	1	1	1	1	1	1	1	1	1	1	2	1	2	1	1	1	1	1	1	1	1	1	1	1	1	1	3	1	1	1	1	1	1	1
578	1471	11802100	123115372	123115372_1471	12	7	6	7	7	1	1	11	11	7	12	14	13	1	11	12	6	3	4	10	4	1	4	1	3	8	1	6	5	1	9	2	2	1	1	13	11	9	9
579	709	5687100	124031113	124031113_ 709	5	1	1	1	1	1	1	1	2	1	1	1	1	1	1	5	4	1	1	1	1	1	2	1	1	1	1	1	1	1	1	1	1	1	1	1	1	1	1
580	1575	12631250	124030815	124030815_1575	1	1	1	1	1	1	1	1	3	1	3	1	1	1	1	4	1	1	1	1	1	1	1	1	1	1	1	1	1	1	1	1	1	1	1	1	1	1	1
581	921	7386150	124036919	124036919_ 921	1	1	1	1	1	1	1	1	1	1	1	1	1	1	1	8	9	8	2	1	1	3	1	1	1	1	1	3	3	1	1	1	1	1	1	1	1	1	1
582	1046	8386683	124035500	124035500_1046	1	1	1	1	1	1	1	1	1	1	1	1	1	1	1	1	1	1	1	1	1	1	1	1	1	1	1	1	1	1	1	1	1	3	1	1	6	4	11
583	114	915467	124043633	124043633_ 114	5	4	1	1	1	1	1	1	1	3	1	1	1	1	1	1	1	1	1	1	1	1	1	1	1	1	1	1	1	1	1	1	1	1	1	1	1	1	1
584	641	5144650	124042320	124042320_ 641	1	1	1	1	1	1	1	1	1	1	1	1	1	1	1	3	1	1	1	1	1	3	6	4	1	1	1	7	6	5	1	1	1	8	5	4	1	1	1
585	711	5702483	124040932	124040932_ 711	1	1	3	1	1	1	1	1	1	1	1	1	1	1	1	10	5	8	1	1	1	16	16	30	1	1	1	32	30	21	1	1	1	33	19	29	1	1	1
586	723	5804417	124039551	124039551_ 723	1	1	1	1	1	1	1	1	1	1	1	1	1	1	1	6	1	1	1	1	1	9	12	14	1	1	1	17	14	13	1	1	1	16	10	11	1	1	1
587	779	6245017	124041267	124041267_ 779	10	1	10	1	1	1	1	1	1	1	2	1	1	1	1	23	14	27	2	1	2	33	45	65	1	4	1	64	64	38	8	12	1	71	43	60	14	1	1
588	787	6316184	124041161	124041161_ 787	5	1	1	1	1	1	1	1	1	1	1	1	1	1	1	13	2	14	1	1	3	1	1	1	1	1	1	1	33	26	1	5	1	31	1	2	1	1	1
589	858	6881900	124041580	124041580_ 858	3	4	1	1	1	1	1	1	1	1	1	1	1	1	1	15	11	20	1	1	1	10	18	17	1	1	1	15	18	8	1	3	1	1	5	7	1	1	1
590	1574	12623550	124040329	124040329_1574	3	4	4	1	1	4	1	4	1	5	3	2	1	1	3	1	1	4	4	1	2	3	4	1	1	1	1	1	3	5	1	3	1	3	4	3	1	4	3
591	864	6928067	124070953	124070953_ 864	1	3	1	1	1	1	1	1	1	1	1	1	1	1	1	4	1	1	1	1	1	3	5	5	1	1	1	6	5	1	1	1	1	1	3	1	1	1	1
592	111	892383	124074867	124074867_ 111	1	4	3	1	3	1	1	9	1	1	1	1	5	1	1	3	1	1	4	2	1	1	1	1	1	1	1	1	1	1	1	1	1	1	1	1	1	4	1
593	289	2320233	124076607	124076607_ 289	1	1	1	1	2	1	1	4	1	1	5	1	1	1	1	1	1	1	1	1	4	1	1	1	1	1	1	1	1	1	1	2	1	1	1	1	1	1	1
594	1471	11802100	124074379	124074379_1471	1	1	1	1	1	1	1	1	1	1	1	1	1	1	1	2	1	1	2	1	1	1	1	1	1	1	1	1	1	1	1	2	1	1	1	1	1	1	1
595	348	2793517	124081863	124081863_ 348	12	9	12	1	1	1	33	21	23	1	1	1	29	1	19	1	1	1	1	16	18	1	1	1	9	15	19	1	4	1	12	18	18	5	1	1	27	24	22
596	401	3220633	124082680	124082680_ 401	4	1	1	1	1	1	8	2	1	1	1	1	1	5	1	1	1	1	1	1	1	3	1	1	4	1	1	1	5	1	1	3	1	1	1	1	11	1	1
597	471	3778650	124084457	124084457_ 471	89	89	95	1	1	1	239	107	122	1	1	1	354	249	214	14	1	10	65	85	119	50	50	80	130	229	195	102	98	21	168	266	214	118	77	1	140	283	229
598	571	4586617	124083900	124083900_ 571	19	20	16	1	1	1	15	6	12	1	1	1	62	40	35	1	1	1	7	9	13	10	1	1	17	42	34	15	22	2	26	60	53	12	9	1	25	46	32
599	580	4655967	124083435	124083435_ 580	5	1	1	1	1	1	12	1	2	1	1	1	39	24	17	1	1	1	1	3	6	1	1	1	4	12	11	3	1	1	1	17	1	1	1	1	1	12	5
600	594	4763700	124083084	124083084_ 594	1	1	1	1	1	1	1	1	1	1	1	1	5	1	1	1	1	1	1	1	1	1	1	1	1	1	1	1	1	1	1	5	1	1	1	1	1	4	2
601	400	3212933	124109497	124109497_ 400	29	29	26	15	14	8	35	27	33	15	26	12	32	27	1	16	18	15	29	23	32	1	14	23	11	22	22	15	23	1	16	18	16	16	12	18	26	1	24
602	794	6370050	124111694	124111694_ 794	1	1	1	1	1	1	3	1	1	1	1	1	1	1	3	1	1	1	1	1	1	1	1	3	1	1	1	1	2	1	1	1	1	1	1	1	1	1	1
603	902	7239950	124109688	124109688_ 902	6	10	5	14	22	16	10	10	7	9	15	15	16	7	1	11	1	5	4	1	7	10	1	11	1	1	1	8	1	3	4	3	1	3	4	1	1	3	1
604	1048	8402083	124110565	124110565_1048	7	7	1	5	8	4	15	11	9	1	11	7	9	3	6	12	14	1	5	10	7	8	10	18	1	9	5	8	11	5	5	5	1	1	6	1	5	7	3
605	1212	9721900	124114807	124114807_1212	1	4	6	1	1	1	5	1	1	1	4	1	3	1	1	1	3	2	3	1	1	12	1	5	1	1	1	1	1	1	1	1	1	1	1	1	1	1	1
606	1273	10210767	124114540	124114540_1273	5	7	8	1	1	1	2	1	1	1	1	3	1	1	1	1	1	1	1	1	1	1	2	1	1	1	1	1	1	1	1	1	1	1	1	1	1	1	1
607	1334	10699433	124110649	124110649_1334	35	31	33	40	59	55	72	38	37	24	35	41	64	8	35	30	32	17	25	30	31	28	35	38	9	36	22	1	35	17	19	21	16	27	19	22	18	30	19
608	1349	10814966	124111435	124111435_1349	1	2	1	1	1	1	1	1	1	4	4	1	11	1	1	2	1	2	4	1	1	1	5	1	1	1	1	1	1	1	1	1	1	1	1	1	1	1	1
609	685	5492816	124117119	124117119_ 685	1	1	1	1	1	1	1	1	1	1	5	1	2	1	1	4	1	2	1	1	1	3	1	6	1	1	1	1	5	1	1	1	1	1	1	1	1	1	1
610	472	3786350	124400085	124400085_ 472	1	1	1	1	1	1	1	1	1	1	1	1	20	18	1	1	1	1	1	1	1	1	1	1	1	1	1	1	1	1	1	17	1	1	1	1	1	17	1
611	1580	12669717	124962936	124962936_1580	1	2	1	7	5	1	6	5	1	7	1	1	7	1	1	3	6	1	3	5	6	1	1	8	1	1	1	3	1	1	5	1	1	1	4	1	1	1	1
612	1580	12669717	124962784	124962784_1580	2	3	1	7	12	6	9	8	2	6	4	8	5	6	1	5	8	1	9	8	4	5	1	6	6	1	1	4	7	3	5	1	1	4	4	3	1	5	1
613	1621	13004500	124961411	124961411_1621	1	1	1	2	1	1	1	1	1	1	1	1	1	1	1	1	1	1	1	3	1	1	1	2	1	1	1	1	1	1	1	1	1	1	1	1	1	1	1
614	1572	12608167	125036621	125036621_1572	5	1	4	1	1	1	1	1	1	2	1	4	1	2	1	3	1	3	5	1	3	1	1	3	4	1	4	1	1	4	1	4	5	1	1	1	3	1	3
615	114	915467	125069366	125069366_ 114	1	1	1	1	1	1	1	1	3	1	1	1	4	1	3	1	1	1	2	1	1	1	1	1	1	1	2	1	1	1	1	2	1	1	1	2	1	1	1
616	202	1621700	125067360	125067360_ 202	4	1	1	1	1	1	5	2	4	1	1	1	4	8	3	1	1	3	3	1	4	1	1	1	1	2	2	1	1	1	2	3	4	1	1	1	1	2	3
617	204	1637083	125071404	125071404_ 204	1	1	1	1	1	1	1	2	4	1	1	1	2	1	1	1	1	1	1	1	1	1	1	1	1	1	1	1	1	1	1	2	1	1	1	1	1	1	1
618	221	1777683	125070045	125070045_ 221	4	1	1	1	1	1	7	1	4	1	1	1	4	2	2	1	1	1	1	1	1	1	1	1	1	1	1	1	1	1	1	1	1	1	1	1	1	1	1
619	378	3034050	125069206	125069206_ 378	27	26	29	5	3	1	35	16	19	8	17	9	75	66	45	17	16	18	61	58	78	17	25	34	37	69	55	23	38	18	60	96	48	25	20	23	87	92	55
620	452	3632450	125068588	125068588_ 452	34	33	31	6	4	3	52	23	31	13	14	4	93	80	53	24	16	24	83	72	110	20	27	37	43	103	65	34	34	25	79	114	70	28	25	26	95	109	76
621	535	4290317	125068695	125068695_ 535	1	5	7	2	3	1	8	4	4	1	5	1	5	5	3	3	2	1	6	1	8	1	2	4	1	4	1	1	2	3	5	7	4	1	3	2	4	5	4
622	471	3778650	125087280	125087280_ 471	3	5	8	1	1	1	18	7	5	1	3	1	25	25	17	1	1	1	1	7	9	4	3	4	10	14	13	4	1	1	15	21	16	1	1	1	12	27	14
623	508	4072967	125082832	125082832_ 508	1	1	1	1	1	1	1	1	1	1	1	1	1	1	1	1	1	1	1	1	1	2	1	1	1	1	1	3	1	1	1	1	1	1	1	1	2	4	1
624	614	4927200	125087769	125087769_ 614	1	1	1	1	2	1	1	1	1	1	3	1	1	1	1	1	1	1	3	1	1	1	1	1	1	1	1	1	1	1	1	1	1	1	1	1	1	1	1
625	581	4663667	125092644	125092644_ 581	1	1	1	5	3	1	1	1	1	7	13	5	1	5	2	1	6	4	8	8	1	1	1	4	1	1	1	1	1	1	1	1	1	1	1	1	1	3	1
626	815	6541333	125095261	125095261_ 815	1	3	1	1	6	1	1	1	1	1	1	1	1	1	1	1	1	2	1	1	1	1	1	1	1	1	1	1	1	1	1	1	1	1	1	1	1	1	1
627	1137	9115800	125094215	125094215_1137	50	45	44	1	1	1	1	1	1	12	10	20	29	32	25	1	1	1	1	1	1	46	1	1	1	1	1	1	1	1	1	1	1	1	1	1	1	1	1
628	1162	9317866	125094170	125094170_1162	11	8	11	1	1	1	1	1	1	1	1	1	4	1	1	1	1	1	1	1	1	6	1	1	1	1	1	1	1	1	1	1	1	1	1	1	1	1	1
629	1208	9691116	125093887	125093887_1208	11	9	13	5	4	1	1	1	6	3	5	2	6	3	5	7	6	7	4	1	1	30	1	4	1	3	3	3	4	1	1	1	1	5	1	2	4	3	1
630	1272	10203067	125094482	125094482_1272	64	70	77	6	1	4	8	8	8	18	34	54	20	13	27	1	1	4	7	2	6	70	1	7	1	1	1	5	12	2	9	1	1	1	1	5	1	1	6
631	1288	10326183	125095833	125095833_1288	64	63	58	3	1	1	1	1	10	1	8	7	3	1	4	1	1	1	1	1	1	2	1	1	1	1	1	1	11	1	1	1	1	1	1	1	1	1	1
632	1332	10684050	125093628	125093628_1332	1	2	2	1	1	1	1	1	6	1	1	1	1	1	1	1	1	1	1	1	1	1	1	1	1	1	1	1	9	1	1	1	1	1	1	1	1	1	1
633	1472	11809783	125093353	125093353_1472	6	1	1	4	5	1	6	5	4	5	1	7	4	1	5	3	4	1	3	4	4	1	1	1	1	8	2	3	4	4	4	1	1	1	1	5	5	4	6
634	227	1823850	125103401	125103401_ 227	2	4	3	1	1	1	5	1	1	1	5	1	8	3	3	3	1	1	3	1	5	1	1	3	1	1	1	1	5	1	1	1	1	4	1	1	1	1	1
635	1226	9829717	125098915	125098915_1226	1	3	6	1	1	1	1	1	1	1	1	1	1	1	1	1	1	1	1	1	1	11	1	1	1	1	1	1	2	1	1	1	1	1	1	1	1	1	1
636	1382	11088183	125099159	125099159_1382	1	1	1	5	1	1	7	4	8	1	1	1	1	1	3	1	1	1	1	1	1	1	1	1	1	1	1	1	12	1	8	1	1	1	1	1	11	1	1
637	1188	9527634	125103325	125103325_1188	1	1	1	2	1	1	1	1	1	1	1	1	1	2	2	1	1	2	2	1	1	1	1	1	1	1	1	4	1	1	1	1	1	1	1	1	1	1	1
638	1480	11871350	125104828	125104828_1480	1	1	4	1	1	1	1	7	1	1	1	1	1	3	1	1	1	1	1	1	1	1	1	1	1	1	1	1	1	1	1	1	1	1	1	4	1	1	1
639	240	1923883	125111389	125111389_ 240	1	1	1	1	1	1	1	1	1	1	1	1	1	1	2	3	1	4	1	1	1	1	1	1	1	1	1	1	1	1	1	1	1	1	1	1	1	1	1
640	1136	9108117	125131729	125131729_1136	6	6	6	1	1	1	1	1	1	1	1	1	1	1	4	1	1	1	1	1	1	1	1	1	1	1	1	1	1	1	1	1	1	1	1	1	1	1	1
641	1163	9325650	125128563	125128563_1163	28	28	23	1	1	1	1	1	1	1	1	3	2	7	3	1	1	1	1	1	1	1	1	1	1	1	1	1	1	1	1	1	1	1	1	1	1	1	1
642	1468	11769417	125129890	125129890_1468	5	1	2	4	1	1	4	3	5	3	1	6	4	1	5	1	1	3	1	1	1	2	1	1	1	1	1	2	1	1	4	1	1	1	1	1	1	1	1
643	1459	11700167	125126831	125126831_1459	3	1	1	1	1	1	1	1	1	1	1	1	1	1	5	1	1	1	1	1	1	1	1	1	1	1	1	1	1	1	2	1	1	1	1	1	1	1	1
644	1290	10341583	125131950	125131950_1290	10	18	16	5	1	1	4	1	7	1	4	5	4	4	1	1	1	2	1	1	1	19	1	1	1	1	1	1	14	1	5	1	1	1	1	1	4	1	1
645	1383	11095866	125132820	125132820_1383	1	1	1	1	1	1	1	1	2	1	1	1	1	1	1	1	1	1	2	1	1	2	1	1	1	1	1	1	4	1	5	1	1	1	1	1	4	1	1
646	1470	11784800	125138962	125138962_1470	1	1	1	1	1	1	2	1	1	1	1	1	1	1	1	2	1	1	1	1	1	1	1	1	1	1	1	1	1	1	1	2	1	1	1	1	1	1	1
647	91	738400	125985146	125985146_ 91	6	1	1	1	1	1	1	1	1	1	1	1	1	1	1	1	1	1	1	1	8	1	7	1	1	1	1	1	1	1	1	1	1	1	1	1	1	1	1
648	665	5338917	125983139	125983139_ 665	1	1	1	1	1	1	2	1	1	1	1	1	1	1	1	1	1	1	1	1	1	1	1	1	1	1	1	1	1	1	3	1	1	1	3	1	1	1	3
649	748	5996883	125978340	125978340_ 748	1	1	1	1	1	1	3	1	1	1	1	1	1	1	1	1	1	1	1	1	1	1	1	1	1	1	1	1	1	1	1	1	1	1	3	1	1	1	2
650	861	6904984	125978943	125978943_ 861	1	1	1	1	2	1	1	1	1	1	1	4	1	1	1	1	1	1	1	1	1	1	1	1	1	1	1	1	1	1	2	1	1	1	3	1	1	1	3
651	1018	8161633	125979515	125979515_1018	1	1	1	1	2	1	3	1	1	1	1	1	1	1	1	1	1	1	1	1	1	1	1	1	1	1	1	1	1	1	1	4	1	1	2	1	1	1	1
652	1586	12715900	125982910	125982910_1586	53	52	48	40	47	46	50	50	48	48	41	47	1	47	42	46	45	44	46	46	41	44	47	45	1	48	44	49	43	42	40	50	1	43	50	51	44	48	47
653	1604	12864000	125981689	125981689_1604	1	1	1	1	5	1	3	4	1	1	1	1	1	1	1	1	1	1	1	1	1	1	1	1	1	1	1	1	1	1	8	1	1	1	1	1	1	1	8
654	1637	13127617	125979660	125979660_1637	4	1	1	1	10	1	8	9	1	1	1	4	1	1	1	1	1	8	2	6	1	5	1	1	1	1	4	4	1	1	6	1	1	1	3	3	1	1	6
655	928	7440017	125985802	125985802_ 928	1	1	1	1	2	1	1	1	1	1	1	1	1	1	1	1	1	1	1	1	1	1	1	1	1	1	1	1	1	1	2	1	1	1	1	1	1	1	3
656	1603	12856300	125985817	125985817_1603	11	1	4	1	18	7	13	14	25	14	1	25	5	1	1	1	1	1	10	11	7	1	4	1	1	1	3	21	1	1	31	10	1	1	1	1	1	18	11
657	1610	12910167	125987144	125987144_1610	1	1	1	1	1	1	4	1	1	7	1	1	1	1	1	1	1	1	1	1	1	1	1	1	1	1	1	1	1	1	1	1	1	1	1	1	1	1	4
658	666	5346617	126037872	126037872_ 666	1	1	1	1	1	1	1	1	1	1	1	1	1	1	1	1	1	3	2	1	1	1	2	1	1	1	1	1	4	1	1	1	1	1	1	1	1	1	1
659	108	869300	126052895	126052895_ 108	9	11	11	11	4	3	20	16	18	4	1	7	20	1	8	2	1	3	13	9	16	1	3	4	1	1	6	4	8	5	1	1	4	3	1	2	1	1	6
660	450	3607467	126073921	126073921_ 450	1	1	1	1	1	1	1	1	1	1	1	1	9	1	1	1	1	1	7	6	9	1	3	1	1	6	1	1	1	3	1	10	1	1	1	1	10	7	5
661	379	3041750	126082535	126082535_ 379	6	5	9	1	3	1	12	7	7	3	2	3	1	13	9	3	1	4	9	9	15	1	1	6	1	1	1	5	9	3	1	15	5	1	1	2	1	11	5
662	450	3607467	126086365	126086365_ 450	1	1	1	1	1	1	1	1	1	1	1	1	1	1	1	1	1	1	1	1	1	1	1	1	1	1	1	1	2	1	6	8	3	1	1	1	1	5	1
663	558	4477000	126087288	126087288_ 558	1	1	3	1	1	1	3	2	1	1	1	1	1	1	1	1	1	1	1	1	3	1	1	1	1	3	1	1	2	1	1	3	1	1	1	1	1	1	1
664	686	5500517	126092918	126092918_ 686	1	1	1	1	1	1	1	1	1	1	1	1	1	1	1	1	1	1	1	1	1	1	1	3	1	1	1	1	1	1	1	6	1	1	2	1	2	1	1
665	1208	9691116	126088737	126088737_1208	8	6	8	1	1	1	1	1	1	1	1	1	1	1	1	1	1	1	1	1	1	20	1	1	1	1	1	1	1	1	1	1	1	1	1	1	1	1	1
666	1272	10203067	126096252	126096252_1272	6	5	6	1	1	1	1	1	1	1	1	1	1	1	1	1	1	1	1	1	1	8	1	1	1	1	1	1	1	1	1	1	1	1	1	1	1	1	1
667	1138	9123500	126101433	126101433_1138	4	1	6	1	1	1	1	1	1	1	1	1	1	1	1	1	1	1	1	1	1	5	1	1	1	1	1	1	1	1	1	1	1	1	1	1	1	1	1
668	1288	10326183	126095100	126095100_1288	6	8	3	1	1	1	1	1	9	1	1	1	1	1	1	1	1	1	1	1	1	6	1	1	1	1	1	1	5	1	1	1	1	1	1	1	1	1	1
669	379	3041750	126095284	126095284_ 379	1	1	1	3	1	1	1	1	1	1	6	1	1	1	1	1	1	1	1	1	4	1	1	3	1	1	1	1	1	1	1	1	1	1	1	1	1	1	1
670	467	3747883	126125534	126125534_ 467	1	8	1	4	1	1	8	6	8	6	7	1	1	8	8	1	4	4	9	10	8	4	5	5	5	9	6	3	4	1	5	1	1	4	1	1	7	1	1
671	1264	10141517	126247032	126247032_1264	1	1	1	1	2	1	1	1	1	1	3	1	3	1	1	1	1	1	1	1	1	1	1	1	1	1	1	1	1	1	1	1	1	1	1	1	1	1	1
672	1266	10156900	126410561	126410561_1266	1	1	1	1	4	1	5	1	1	1	1	1	3	1	1	1	1	1	1	1	1	1	1	1	1	1	1	1	1	1	1	1	1	1	1	1	1	1	1
673	1267	10164600	126447357	126447357_1267	1	1	1	1	1	1	5	1	1	1	1	3	4	1	1	1	1	1	1	1	1	1	1	1	1	1	1	1	1	1	1	1	1	1	1	1	1	1	1
674	1581	12677417	126967896	126967896_1581	5	3	3	1	7	5	4	6	7	4	6	1	3	5	3	3	7	1	1	5	1	5	4	6	5	4	6	1	6	3	1	1	3	4	3	3	2	3	3
675	1582	12685117	126968597	126968597_1582	4	2	2	1	3	1	5	3	3	1	2	2	3	5	1	1	1	1	1	3	1	3	4	4	4	7	1	1	2	1	1	1	3	1	2	1	3	2	3
676	1644	13181483	126969307	126969307_1644	1	1	2	1	4	8	6	5	6	1	10	4	3	2	5	2	1	1	1	4	4	2	2	2	2	3	1	1	1	1	1	1	3	2	3	1	3	2	2
677	1654	13268033	126970535	126970535_1654	1	1	3	1	5	3	3	2	6	1	4	5	2	1	1	1	1	1	1	1	1	1	1	2	1	4	1	1	1	1	1	1	3	1	1	1	3	3	1
678	1582	12685117	126989372	126989372_1582	1	1	1	1	1	1	1	1	1	1	1	3	1	1	1	1	1	1	2	1	1	1	1	1	1	4	1	1	1	1	1	1	1	1	1	1	1	1	1
679	464	3724783	127036873	127036873_ 464	1	1	1	1	1	1	2	1	1	1	1	1	1	1	1	1	1	2	3	1	5	1	1	4	1	5	1	5	6	1	6	1	1	1	2	1	8	1	5
680	627	5027317	127035667	127035667_ 627	1	1	1	2	1	1	1	1	1	1	1	1	1	1	1	2	1	3	1	1	1	1	1	1	1	1	1	1	1	1	1	1	1	1	1	1	1	1	1
681	843	6766467	127037277	127037277_ 843	1	6	4	6	6	1	9	2	5	7	10	7	12	1	4	5	7	5	7	1	5	1	8	8	2	7	3	5	9	1	1	2	3	1	1	5	5	5	1
682	125	1009817	127044579	127044579_ 125	5	6	3	1	1	1	5	1	1	1	1	1	1	1	1	1	1	1	1	1	1	1	1	1	1	1	1	1	1	1	1	1	1	1	1	1	1	1	1
683	166	1335083	127048576	127048576_ 166	40	44	46	1	1	1	11	7	5	1	1	1	10	1	1	5	1	4	8	5	11	1	4	7	5	7	6	1	9	1	5	7	3	6	4	5	7	7	7
684	215	1731417	127050064	127050064_ 215	6	9	8	1	1	1	1	1	6	1	1	1	6	1	1	4	7	2	1	1	1	1	1	1	1	1	1	1	1	1	4	7	1	1	1	1	1	1	1
685	419	3359333	127049843	127049843_ 419	30	33	30	1	1	1	1	1	1	1	1	1	22	9	1	10	11	15	5	3	7	6	5	11	3	11	1	1	1	1	13	1	1	4	10	5	2	1	1
686	687	5508217	127064629	127064629_ 687	1	1	1	1	1	1	1	1	1	1	5	1	2	1	1	5	1	3	1	1	1	1	1	1	1	1	1	1	1	1	1	1	1	1	1	1	1	1	1
687	179	1435117	127071594	127071594_ 179	1	1	1	1	1	1	1	1	1	1	1	1	2	1	1	2	1	1	1	1	1	1	1	1	1	1	1	1	1	1	1	1	3	1	1	1	1	1	1
688	764	6129600	127070122	127070122_ 764	1	1	1	1	1	1	1	1	1	2	1	1	5	1	1	1	1	2	3	1	1	1	1	1	1	1	3	1	4	1	3	5	9	2	1	1	3	1	1
689	684	5485133	127074837	127074837_ 684	5	7	5	3	1	1	1	1	1	9	1	5	1	1	1	1	7	5	4	1	4	9	4	9	1	5	1	6	9	7	5	4	1	5	4	5	1	1	1
690	826	6626067	127076035	127076035_ 826	1	1	1	3	4	1	1	1	1	1	1	1	1	1	1	3	3	1	1	1	1	1	1	1	1	1	1	1	1	1	1	1	1	1	1	1	1	1	1
691	1209	9698816	127076248	127076248_1209	1	1	1	1	3	3	1	1	1	1	1	1	1	1	1	1	1	1	1	1	1	1	1	1	1	1	1	1	1	1	1	1	1	1	1	1	3	1	4
692	108	869300	127087708	127087708_ 108	1	1	2	1	1	1	1	1	1	1	1	1	3	1	1	1	1	1	1	1	1	1	1	1	1	1	1	1	1	1	1	2	2	1	1	1	1	1	1
693	473	3794050	127083778	127083778_ 473	4	2	6	1	3	1	7	4	6	3	6	1	1	1	5	1	1	6	1	6	8	4	1	1	1	5	1	5	4	6	6	2	1	4	6	5	1	7	6
694	488	3919067	127084869	127084869_ 488	14	14	12	3	8	1	24	13	17	7	12	8	18	12	10	5	7	9	10	10	17	9	7	1	7	11	10	8	12	7	9	12	9	6	6	7	14	14	13
695	1138	9123500	127107635	127107635_1138	1	3	5	1	1	1	1	1	1	1	1	2	1	1	1	1	1	1	1	1	1	4	1	1	1	1	1	1	1	1	1	1	1	1	1	1	1	1	1
696	1164	9333350	127110565	127110565_1164	5	1	4	1	1	1	1	1	1	1	1	1	1	1	1	1	1	1	1	1	1	7	1	1	1	1	1	1	1	1	1	1	1	1	1	1	1	1	1
697	1272	10203067	127111702	127111702_1272	7	5	4	1	1	1	1	1	1	1	1	4	1	1	1	1	1	1	1	1	1	1	1	1	1	1	1	1	1	1	1	1	1	1	1	1	1	1	1
698	1265	10149200	127662437	127662437_1265	1	1	1	1	2	1	1	1	1	1	1	1	2	1	3	1	1	1	1	1	1	1	1	1	1	1	1	1	1	1	1	1	1	1	1	1	1	1	1
699	1265	10149200	127718033	127718033_1265	1	1	1	1	1	1	5	1	1	1	1	2	1	1	2	1	1	1	1	1	1	1	1	1	1	1	1	1	1	1	1	1	1	1	1	1	1	1	1
700	1265	10149200	127795082	127795082_1265	1	1	1	1	1	1	1	1	1	1	1	1	4	1	2	1	1	1	1	1	1	1	1	1	1	2	1	1	1	1	1	1	1	1	1	1	1	1	1
701	1267	10164600	127830879	127830879_1267	1	1	1	1	1	1	6	1	1	1	4	1	3	1	1	1	1	1	1	1	1	1	1	1	1	1	1	1	1	1	1	1	1	1	1	1	1	1	1
702	1267	10164600	127869911	127869911_1267	1	1	1	1	6	1	5	1	1	1	1	1	3	1	1	1	1	1	1	1	1	1	1	1	1	1	1	1	1	1	1	1	1	1	1	1	1	1	1
703	1576	12638950	127956856	127956856_1576	1	2	3	3	1	1	1	1	1	1	1	1	1	2	1	1	1	1	1	1	1	1	1	1	1	1	1	1	1	1	1	1	2	1	1	2	1	1	1
704	1573	12615867	127970757	127970757_1573	1	2	2	5	1	4	3	3	4	4	3	1	3	4	1	1	4	1	4	3	3	5	3	4	4	3	2	3	1	1	1	1	1	3	1	4	3	3	3
705	1581	12677417	127971642	127971642_1581	1	1	1	2	2	2	5	2	1	2	4	2	1	2	1	1	4	1	4	1	2	2	1	1	2	2	1	1	1	1	1	1	1	1	1	2	2	2	1
706	1632	13089150	127973572	127973572_1632	1	1	1	3	1	2	2	3	1	2	2	1	1	2	1	1	1	1	2	1	1	1	1	1	2	2	1	1	1	1	1	1	1	1	1	1	2	1	1
707	91	738400	128017410	128017410_ 91	2	1	1	1	1	1	1	1	1	1	1	1	2	1	1	1	1	1	1	1	1	1	1	1	1	1	1	1	1	1	1	1	1	1	2	1	1	1	1
708	1574	12623550	128015976	128015976_1574	1	1	2	1	1	1	1	1	1	1	1	1	2	1	1	2	2	1	1	1	1	1	1	1	1	1	2	1	2	1	1	1	1	1	2	1	1	1	1
709	417	3343933	128051483	128051483_ 417	2	4	1	1	1	1	2	1	1	1	1	1	3	1	1	1	1	1	1	1	1	1	1	1	1	1	1	1	1	1	1	1	1	1	2	1	3	1	1
710	419	3359333	128070374	128070374_ 419	1	1	1	1	1	1	1	1	1	1	2	1	1	1	1	1	1	1	1	1	1	1	1	2	1	1	1	1	2	1	1	1	1	1	1	1	1	1	1
711	647	5190817	128069595	128069595_ 647	1	1	1	1	1	1	1	1	1	1	1	1	1	1	1	1	1	3	1	1	1	1	5	4	1	1	1	4	6	3	1	1	1	1	4	1	1	1	1
712	1116	8954217	128067368	128067368_1116	1	1	1	1	1	1	3	1	2	1	1	1	1	1	1	1	1	1	1	1	1	1	1	1	1	1	1	1	1	1	1	1	1	1	2	1	1	1	1
713	322	2583850	128104080	128104080_ 322	1	1	1	1	1	1	1	1	1	1	1	1	1	1	1	1	1	1	1	1	1	2	3	5	1	1	1	1	1	1	1	1	3	6	1	1	3	7	5
714	1049	8409766	128105865	128105865_1049	1	2	3	1	1	1	1	1	1	1	1	1	1	1	1	1	1	1	1	1	1	11	1	1	1	1	1	1	1	1	1	1	1	1	1	1	1	1	1
715	1174	9419900	128105194	128105194_1174	20	19	22	1	1	1	1	1	1	1	1	1	1	1	1	1	1	1	1	1	1	88	1	1	1	1	1	1	1	1	1	1	1	1	1	1	1	1	1
716	1207	9683416	128106995	128106995_1207	24	27	20	1	5	1	1	1	4	1	1	1	1	1	1	1	1	1	1	1	1	94	1	1	1	1	1	1	6	1	3	2	1	1	1	1	1	1	1
717	1289	10333883	128105484	128105484_1289	120	130	131	16	3	1	5	7	44	1	1	5	1	1	3	10	3	1	6	1	1	148	3	3	1	1	1	5	23	1	5	1	1	1	1	5	10	1	1
718	1379	11055500	128105240	128105240_1379	6	5	5	15	1	1	1	9	27	1	1	1	1	1	7	1	1	1	1	1	1	9	1	1	1	1	1	1	26	1	16	1	1	1	1	1	13	1	1
719	1465	11746333	128105713	128105713_1465	13	11	11	8	10	1	15	10	16	13	12	16	12	3	14	1	7	9	4	11	9	6	7	1	1	15	3	5	10	7	11	4	1	1	1	11	16	6	14
720	1482	11886733	128105621	128105621_1482	1	11	9	15	1	1	1	16	9	1	1	1	1	1	1	1	1	1	1	1	1	1	1	1	1	1	1	1	9	1	4	1	1	1	1	1	9	1	1
721	375	3010967	128107620	128107620_ 375	1	4	1	1	1	1	1	1	1	1	1	1	1	1	1	6	4	3	1	1	3	1	1	1	1	1	1	1	1	1	1	1	1	1	1	1	1	1	1
722	1298	10412733	128106567	128106567_1298	1	1	1	5	1	1	1	1	18	1	1	1	1	1	1	1	1	1	1	1	1	1	1	1	1	1	1	1	13	1	1	1	1	1	1	1	6	1	1
723	1305	10466600	128108658	128108658_1305	1	1	1	3	1	1	1	1	7	1	1	1	1	1	1	1	1	1	1	1	1	1	1	1	1	1	1	1	1	1	1	1	1	1	1	1	6	1	1
724	1459	11700167	128110458	128110458_1459	1	1	10	1	1	1	1	1	7	1	1	1	1	1	1	1	1	1	1	1	1	1	1	1	1	1	1	1	2	1	1	1	1	1	1	1	1	1	1
725	1631	13081450	128957443	128957443_1631	1	1	1	1	1	1	1	1	1	1	5	3	1	2	1	1	1	1	1	1	1	1	1	1	1	1	1	1	1	1	1	1	1	1	1	1	1	1	1
726	139	1117733	128984116	128984116_ 139	1	2	1	1	1	1	1	1	1	2	3	1	1	1	1	1	1	2	1	1	1	1	1	1	1	1	2	1	2	1	1	1	1	1	1	1	2	1	1
727	1109	8890750	129015778	129015778_1109	38	35	27	24	21	45	88	37	29	27	29	34	30	29	16	11	8	21	20	28	33	1	39	13	13	27	10	15	35	20	1	7	16	25	33	17	33	20	19
728	1181	9473766	129015717	129015717_1181	8	9	10	17	15	10	29	14	16	10	11	1	12	1	8	7	9	7	11	7	7	1	8	6	8	8	6	8	6	10	6	5	4	9	8	7	1	8	9
729	790	6339267	129054138	129054138_ 790	4	4	4	4	4	3	5	3	4	1	22	5	5	1	6	4	1	2	4	4	1	5	1	3	1	5	1	1	9	1	3	4	1	5	1	1	1	1	1
730	781	6270017	129053879	129053879_ 781	1	3	1	3	5	1	2	1	1	1	9	2	1	1	1	1	1	2	1	1	1	2	1	4	1	1	1	1	2	1	1	1	1	1	1	1	1	1	1
731	840	6733800	129053406	129053406_ 840	21	20	20	16	25	17	24	13	15	14	22	21	26	19	22	15	15	14	18	17	15	21	22	21	8	19	9	16	24	14	14	13	7	17	9	13	1	13	13
732	1137	9115800	129090408	129090408_1137	29	24	29	1	1	1	1	1	1	1	1	8	18	18	13	1	1	1	1	1	1	1	1	1	1	1	1	1	1	1	1	1	1	1	1	1	1	1	1
733	1273	10210767	129090256	129090256_1273	38	40	42	1	4	1	1	1	4	8	15	26	11	9	10	1	1	1	2	1	1	1	1	3	1	1	1	1	1	1	1	1	1	1	1	1	1	1	1
734	306	2460733	129097351	129097351_ 306	1	1	1	1	1	1	1	1	1	1	1	1	1	1	1	1	1	1	2	1	3	1	1	1	1	2	1	1	1	1	1	2	2	1	1	1	1	3	1
735	625	5011933	129096664	129096664_ 625	1	1	1	1	1	1	1	1	1	1	1	1	1	1	1	1	1	1	1	1	1	1	2	4	1	1	1	1	1	1	1	1	1	1	3	2	1	1	1
736	1164	9333350	129092972	129092972_1164	8	6	6	1	1	1	1	1	1	1	1	1	2	1	1	1	1	1	1	1	1	1	1	1	1	1	1	1	1	1	1	1	1	1	1	1	1	1	1
737	449	3599767	129102005	129102005_ 449	1	4	2	1	1	1	1	3	1	1	1	1	1	1	1	1	1	1	1	1	2	1	1	1	1	2	1	2	1	1	1	3	1	1	1	2	1	1	5
738	1178	9450684	129110596	129110596_1178	1	4	2	1	1	1	1	1	1	1	1	1	1	1	1	1	1	1	1	1	1	7	1	1	1	1	1	1	1	1	1	1	1	1	1	1	1	1	1
739	1289	10333883	129108917	129108917_1289	16	15	15	1	1	1	2	1	2	1	1	1	4	1	1	1	1	1	1	1	1	18	1	1	1	1	1	2	1	1	1	1	1	1	1	1	1	1	1
740	1305	10466600	129111908	129111908_1305	1	7	6	1	1	1	1	1	3	1	1	1	1	1	1	1	1	1	1	1	1	8	1	1	1	1	1	2	1	1	1	1	1	1	1	1	1	1	1
741	1135	9100417	129128082	129128082_1135	1	3	3	1	1	1	1	1	1	1	1	1	1	3	1	1	1	1	1	1	1	1	1	1	1	1	1	1	1	1	1	1	1	1	1	1	1	1	1
742	1265	10149200	129137894	129137894_1265	1	1	4	1	1	2	1	1	1	1	1	1	1	1	5	1	1	1	1	1	1	1	1	1	1	1	1	1	1	1	1	1	1	1	1	1	1	1	1
743	1625	13035283	129980499	129980499_1625	1	1	2	1	1	1	1	2	2	2	1	1	2	2	2	1	1	1	1	1	1	1	1	1	1	1	1	1	1	1	1	1	4	1	1	2	1	1	1
744	360	2885850	130005356	130005356_ 360	1	1	1	1	1	1	1	1	1	1	1	1	1	1	2	1	1	1	1	1	1	1	1	1	1	1	1	1	1	1	1	1	2	1	1	1	2	1	1
745	1641	13158400	129999680	129999680_1641	1	1	1	1	1	1	1	1	2	1	1	1	1	1	1	1	1	1	1	1	3	1	1	1	1	1	1	1	1	1	1	1	1	1	1	1	3	1	1
746	700	5617833	130008774	130008774_ 700	1	1	1	1	2	1	1	2	3	1	1	1	1	1	1	1	1	1	1	1	2	1	1	1	1	1	1	1	1	1	1	1	1	1	1	1	2	1	1
747	1616	12956433	130006699	130006699_1616	4	2	1	1	1	1	1	1	3	1	1	1	1	1	2	1	2	1	1	1	2	2	1	2	1	1	1	2	2	1	1	1	2	2	1	1	2	1	1
748	1114	8938817	130020966	130020966_1114	1	1	1	1	2	1	1	2	1	1	1	1	2	1	1	1	1	1	1	1	1	1	1	1	1	1	1	1	1	1	1	1	1	1	1	1	1	1	1
749	625	5011933	130030151	130030151_ 625	1	1	1	1	1	1	1	1	1	1	2	1	1	1	1	1	1	1	1	1	1	1	4	3	1	1	1	1	3	1	1	1	1	1	2	1	1	1	1
750	533	4274933	130063293	130063293_ 533	299	305	297	174	197	138	474	295	312	178	236	138	398	306	282	182	170	170	358	300	432	151	175	235	168	282	221	200	222	156	258	279	240	214	146	190	329	313	291
751	549	4407650	130063171	130063171_ 549	101	103	102	60	55	37	212	125	105	58	77	45	167	124	105	57	95	58	157	116	164	98	124	70	62	108	86	127	156	54	85	112	90	133	104	120	108	108	115
752	584	4686750	130063370	130063370_ 584	88	79	76	60	18	57	154	83	84	41	22	40	125	94	86	43	35	21	113	80	120	39	48	64	44	86	66	53	65	41	82	82	66	44	34	41	91	87	84
753	592	4748317	130063446	130063446_ 592	108	101	119	78	71	37	240	112	121	54	82	55	177	131	117	54	46	53	170	113	165	50	59	82	58	119	101	70	70	54	108	122	91	73	54	55	130	129	133
754	1347	10799566	130059616	130059616_1347	2	1	1	1	1	1	1	1	1	1	1	1	1	1	1	6	4	3	1	1	1	1	1	1	1	1	1	1	2	1	1	1	1	1	1	1	1	1	1
755	1366	10955367	130061966	130061966_1366	1	1	1	3	1	1	1	1	1	1	1	1	1	1	1	5	6	3	1	1	1	1	1	1	1	1	1	1	1	1	1	1	1	1	1	1	1	1	1
756	417	3343933	130063385	130063385_ 417	56	57	54	38	28	18	124	58	64	29	42	24	105	77	51	31	27	27	72	54	91	30	29	38	29	48	44	35	48	25	74	62	48	38	25	26	77	62	52
757	433	3476650	130063995	130063995_ 433	19	7	19	12	10	7	45	22	22	8	15	11	34	26	19	12	7	5	22	18	26	8	8	16	8	15	15	10	14	8	7	21	18	11	6	5	26	22	15
758	447	3584383	130063324	130063324_ 447	31	19	23	18	15	12	59	35	30	15	25	15	51	33	24	19	14	15	36	28	42	14	18	24	14	28	23	20	27	18	24	25	26	19	12	12	38	37	27
759	465	3732483	130065170	130065170_ 465	4	1	1	5	1	1	1	11	1	1	1	1	12	8	1	1	1	1	1	1	5	1	2	1	1	1	1	1	1	1	1	2	3	1	1	1	2	2	2
760	480	3847917	130064041	130064041_ 480	17	1	17	24	7	6	26	43	13	1	1	1	74	46	7	8	3	9	17	9	19	8	7	14	1	12	7	12	3	8	12	17	3	13	9	11	18	15	14
761	567	4546250	130064728	130064728_ 567	7	1	1	1	1	2	9	3	5	1	1	1	1	1	1	5	1	3	8	1	7	2	3	5	1	6	4	1	1	3	5	1	5	3	2	1	1	1	7
762	623	4996550	130064026	130064026_ 623	36	31	29	21	3	14	95	43	39	20	1	16	53	43	35	20	18	5	56	44	60	16	20	24	21	39	25	22	31	19	36	40	34	24	15	21	50	46	48
763	689	5523600	130066238	130066238_ 689	2	1	1	1	1	1	2	1	1	1	1	1	2	1	1	2	2	2	5	7	1	1	3	1	1	1	1	1	5	1	1	4	3	2	1	1	5	4	3
764	725	5819800	130063980	130063980_ 725	2	1	1	1	1	1	3	1	3	1	1	1	1	1	1	6	1	5	1	1	7	5	7	7	1	4	1	14	10	5	5	4	5	11	8	8	7	6	5
765	803	6439300	130065582	130065582_ 803	1	1	1	3	1	1	1	1	1	1	1	1	1	1	1	3	1	1	1	1	1	1	1	1	1	1	1	1	2	1	1	2	1	1	1	1	1	1	1
766	923	7401550	130066986	130066986_ 923	1	1	1	1	1	1	1	1	1	1	1	1	1	1	1	6	1	2	1	1	1	1	1	1	1	1	1	1	4	1	1	1	1	2	1	1	1	1	1
767	956	7665167	130063019	130063019_ 956	1	1	1	2	1	1	1	1	1	1	1	1	3	1	1	1	2	1	1	1	1	1	1	1	1	1	1	1	1	1	1	1	1	2	1	1	2	1	1
768	402	3228317	130080017	130080017_ 402	1	1	1	1	1	1	1	1	1	1	1	1	1	1	2	1	1	1	5	1	11	1	1	1	1	1	1	1	1	1	1	1	3	1	5	1	1	1	1
769	608	4881033	130078766	130078766_ 608	1	1	1	1	1	1	7	5	4	1	1	1	1	1	2	1	1	1	1	1	1	1	2	1	1	1	1	1	5	1	1	1	2	1	1	1	1	1	1
770	692	5556283	130081360	130081360_ 692	2	2	1	1	1	1	1	1	1	1	1	2	1	1	1	1	1	1	1	1	3	1	1	1	1	1	1	1	1	2	1	2	1	1	1	1	1	1	1
771	1323	10614800	130082596	130082596_1323	1	1	1	1	2	2	2	1	1	2	1	3	2	1	2	2	4	1	1	1	1	1	2	1	1	1	1	1	2	1	2	1	1	1	1	1	1	2	1
772	1353	10855333	130081177	130081177_1353	1	1	1	1	1	1	3	1	1	1	1	1	3	1	1	2	3	1	1	1	1	1	1	1	1	1	1	1	1	1	1	1	1	1	1	1	1	1	1
773	1554	12460067	130085144	130085144_1554	9	3	7	15	17	16	13	15	12	12	1	15	12	11	14	1	12	11	12	13	10	11	1	10	9	1	13	9	10	11	12	11	8	9	10	10	12	10	12
774	495	3972933	130087341	130087341_ 495	1	1	1	1	1	1	2	1	1	1	1	1	1	1	1	1	1	1	2	1	1	1	1	1	1	1	1	1	1	1	1	1	1	1	2	1	1	1	1
775	1552	12444667	130093399	130093399_1552	1	1	1	1	1	1	1	1	1	1	1	1	1	1	1	12	1	1	1	1	2	1	1	1	1	10	1	1	1	1	1	1	1	1	1	1	1	1	1
776	502	4026800	130120331	130120331_ 502	12	11	1	12	16	6	17	4	6	1	18	11	9	8	6	11	9	10	10	3	10	1	16	15	1	4	1	13	13	8	5	5	5	17	9	9	7	4	4
777	568	4553950	130120163	130120163_ 568	1	1	1	1	1	1	1	1	1	1	4	1	1	1	1	1	1	1	1	1	1	2	1	2	1	1	1	1	1	1	1	1	1	1	1	1	1	1	1
778	719	5764050	130156326	130156326_ 719	3	3	1	1	1	1	1	2	3	1	1	1	1	1	1	2	3	4	1	1	1	2	1	1	1	1	1	1	1	1	1	2	1	1	1	2	1	1	1
779	415	3328550	130157669	130157669_ 415	49	57	57	40	59	41	50	27	24	52	88	38	49	27	35	44	36	46	34	22	40	29	46	47	9	30	23	33	43	29	29	1	20	51	28	30	33	30	29
780	1033	8286650	130157333	130157333_1033	50	40	50	46	40	28	60	26	28	42	67	45	57	33	42	40	32	46	48	31	44	39	53	55	10	31	1	53	57	38	28	25	17	50	29	41	40	33	35
781	1430	11467317	130157104	130157104_1430	4	1	1	5	3	1	1	3	1	3	2	3	3	3	1	4	2	3	3	1	1	1	1	2	1	3	1	2	1	2	1	3	1	1	1	2	2	1	1
782	1531	12283083	130156982	130156982_1531	1	1	1	4	1	1	1	5	1	1	3	1	1	1	1	3	1	3	1	1	1	1	1	1	1	3	1	1	1	1	1	3	1	1	1	1	1	1	5
783	1350	10822650	130160614	130160614_1350	2	2	1	3	2	1	3	1	1	2	1	1	1	3	2	2	2	1	1	1	1	1	1	1	1	2	1	1	1	2	1	3	1	1	1	2	1	1	2
784	1503	12058017	130160980	130160980_1503	1	1	1	1	1	1	1	3	1	1	1	1	1	1	1	4	1	3	1	1	1	1	1	1	1	4	1	1	1	1	1	4	1	1	1	1	1	1	1
785	1264	10141517	130404007	130404007_1264	1	1	1	1	1	1	1	1	2	1	1	1	1	1	2	1	1	1	1	1	3	1	1	1	1	1	1	1	1	1	1	1	1	1	1	1	1	1	1
786	1267	10164600	130426254	130426254_1267	1	1	1	3	1	1	1	1	1	1	2	1	1	1	1	2	1	1	1	1	1	1	1	1	1	1	1	1	1	1	1	1	1	1	1	1	1	1	1
787	1266	10156900	130471634	130471634_1266	1	1	1	1	1	1	1	1	3	1	1	4	1	1	1	1	1	1	1	2	1	1	1	1	1	1	1	1	1	1	1	1	1	1	1	1	1	1	1
788	1265	10149200	130497925	130497925_1265	1	1	1	1	1	5	1	1	1	1	1	1	1	1	1	1	1	1	1	1	1	2	1	1	1	1	1	1	1	1	1	1	1	1	1	2	1	1	1
789	1266	10156900	130534866	130534866_1266	1	1	1	3	3	4	1	1	6	1	1	1	1	1	1	1	1	1	1	1	1	1	2	2	1	1	1	1	1	1	1	1	1	1	1	1	1	1	1
790	1268	10172283	130561554	130561554_1268	1	1	1	6	1	3	1	1	1	1	5	1	1	1	4	1	1	1	1	1	1	1	1	1	1	1	1	3	1	1	2	1	1	1	1	1	1	2	1
791	1267	10164600	130592468	130592468_1267	1	1	1	5	1	1	1	1	1	4	1	1	4	1	3	1	1	1	1	3	1	4	1	2	1	1	1	1	1	1	1	1	1	1	1	1	1	1	1
792	1266	10156900	130609787	130609787_1266	1	1	1	1	3	3	3	4	1	1	1	1	1	1	1	1	1	1	1	1	1	1	1	1	1	1	1	1	1	1	1	1	1	1	1	1	1	1	1
793	1267	10164600	130638184	130638184_1267	1	1	1	4	1	3	1	1	1	1	1	1	1	1	1	1	1	1	2	1	1	1	1	1	1	1	1	1	1	3	1	2	1	1	1	1	1	1	1
794	1267	10164600	130656448	130656448_1267	1	1	1	1	3	1	1	5	3	1	1	1	1	1	1	1	1	1	1	1	1	1	1	1	1	3	1	1	1	1	1	1	1	1	1	3	1	1	1
795	1264	10141517	130683609	130683609_1264	1	1	1	1	1	1	1	1	1	1	1	1	4	1	5	2	1	1	1	1	1	3	1	1	1	1	1	1	1	1	1	1	1	1	1	1	1	3	1
796	1267	10164600	130719803	130719803_1267	1	1	1	2	1	1	3	4	1	1	1	1	1	1	1	1	1	1	1	1	3	1	1	1	1	1	1	1	1	1	1	1	1	1	1	1	1	3	1
797	1267	10164600	130755386	130755386_1267	1	1	1	3	1	4	1	1	1	1	1	1	1	1	1	1	1	1	2	1	1	1	1	1	1	1	1	1	1	1	1	2	1	1	1	1	1	1	1
798	1265	10149200	130809036	130809036_1265	1	1	1	2	1	1	1	1	4	1	1	1	3	1	1	1	1	1	1	1	1	1	1	1	1	1	1	1	1	1	1	1	1	1	1	1	1	1	1
799	1268	10172283	130835251	130835251_1268	1	1	1	3	1	1	1	2	1	1	1	1	2	1	1	1	1	1	1	1	1	1	1	1	1	1	1	1	1	1	1	1	1	1	1	1	1	1	1
800	1580	12669717	130934097	130934097_1580	5	1	1	1	3	1	1	1	1	1	1	1	1	1	1	1	1	1	1	1	1	1	1	2	1	1	2	1	1	1	1	1	1	1	1	1	3	1	4
801	1647	13204567	130965591	130965591_1647	1	1	1	1	2	2	1	1	1	3	1	1	1	1	1	1	1	1	1	1	1	1	1	1	1	1	1	3	1	1	2	1	1	1	1	1	1	1	1
802	399	3205233	131019394	131019394_ 399	1	1	1	1	1	1	1	1	1	1	1	1	1	1	1	1	1	1	1	1	3	2	1	1	1	1	1	1	1	1	2	1	1	1	1	1	1	1	1
803	517	4151817	131051743	131051743_ 517	9	1	1	1	1	6	13	1	1	5	1	9	9	8	8	7	1	1	1	13	14	1	1	1	1	1	9	1	6	1	1	10	1	1	1	1	10	1	5
804	711	5702483	131048340	131048340_ 711	11	10	12	11	11	5	40	18	16	1	1	1	1	3	1	6	3	7	21	12	16	5	7	12	5	13	12	9	12	1	8	13	9	2	5	5	4	15	15
805	725	5819800	131047211	131047211_ 725	1	5	1	1	1	1	14	6	1	1	1	1	1	1	1	1	1	4	1	5	1	1	1	5	1	3	5	1	1	1	2	5	1	1	1	1	1	1	6
806	417	3343933	131066193	131066193_ 417	5	4	5	1	2	1	11	4	6	1	5	1	9	4	1	3	1	2	7	7	10	1	1	1	2	4	4	4	1	4	6	7	2	2	2	2	8	4	5
807	435	3492050	131065262	131065262_ 435	1	2	1	1	1	1	4	1	3	1	1	1	4	1	1	1	1	1	1	1	1	1	1	1	1	1	1	1	1	1	1	1	1	1	1	1	1	1	1
808	449	3599767	131064285	131064285_ 449	1	6	1	1	1	1	9	1	3	1	1	1	5	3	1	1	1	2	2	1	3	1	1	1	1	1	1	1	1	1	1	3	1	1	2	1	1	1	1
809	512	4113333	131065353	131065353_ 512	16	17	12	1	12	1	17	1	10	10	1	7	12	8	1	3	1	8	11	1	1	1	1	6	1	15	9	6	8	2	11	14	10	1	1	1	11	11	1
810	534	4282633	131066711	131066711_ 534	33	35	32	17	23	11	54	34	35	22	26	17	43	31	29	23	14	26	41	32	51	18	15	22	5	31	22	23	28	14	26	30	30	21	18	21	36	35	31
811	550	4415433	131065994	131065994_ 550	14	8	14	11	7	1	30	16	14	7	14	4	22	13	13	4	11	6	17	11	13	7	11	7	4	8	8	12	18	4	7	15	8	15	4	15	14	13	16
812	622	4988850	131066345	131066345_ 622	3	13	1	1	1	1	19	8	8	1	1	1	3	11	8	1	1	3	11	1	7	1	4	1	1	3	1	1	4	1	1	1	5	1	1	1	8	1	1
813	595	4771400	131066040	131066040_ 595	8	13	7	1	4	1	26	11	10	5	6	4	14	14	10	2	4	5	6	12	18	5	6	5	1	15	3	5	6	1	10	10	13	1	1	4	13	12	6
814	417	3343933	131071808	131071808_ 417	1	1	6	1	1	1	1	4	1	1	1	1	1	1	1	1	1	1	1	1	1	1	1	1	1	1	1	1	1	1	1	1	5	1	1	1	1	1	1
815	513	4121033	131071472	131071472_ 513	1	1	1	1	1	1	1	1	1	1	1	1	1	1	1	1	1	1	1	1	19	1	1	13	19	1	1	1	1	1	1	1	1	1	9	1	1	1	5
816	584	4686750	131075867	131075867_ 584	8	1	11	1	1	4	1	1	1	1	1	1	1	5	1	1	1	1	1	10	1	1	1	1	1	12	1	2	2	1	4	4	1	7	1	1	1	1	1
817	706	5664017	131082916	131082916_ 706	3	1	1	1	2	1	1	1	1	1	1	1	1	1	1	2	1	1	1	1	1	2	1	1	1	1	1	4	6	1	1	1	1	1	1	1	1	1	1
818	689	5523600	131082001	131082001_ 689	3	2	1	1	4	1	3	1	1	3	8	1	5	1	1	5	3	3	3	4	1	5	4	1	1	1	1	3	5	5	1	1	1	7	1	5	1	1	1
819	896	7184083	131081238	131081238_ 896	3	2	3	1	1	1	1	1	1	2	1	1	2	1	1	1	1	1	1	2	1	1	1	1	1	1	1	1	3	1	1	1	1	2	1	1	1	1	1
820	1044	8371300	131082321	131082321_1044	5	4	5	1	3	1	3	1	1	1	1	1	1	1	1	1	3	5	1	1	1	3	1	1	1	1	1	1	2	1	2	1	1	1	1	1	1	1	1
821	1338	10730217	131083038	131083038_1338	1	1	1	1	1	1	1	1	16	1	1	1	1	1	1	1	1	1	1	1	1	1	1	1	1	1	1	1	13	1	2	1	1	1	1	1	5	1	1
822	1324	10622500	131087097	131087097_1324	1	3	1	1	1	1	1	3	44	1	1	1	1	1	1	1	1	1	1	1	1	1	1	1	1	1	1	1	39	1	3	2	1	1	1	1	9	1	1
823	415	3328550	131160904	131160904_ 415	5	1	5	4	4	1	1	3	1	5	6	3	3	1	1	1	1	4	1	1	1	2	4	4	1	1	1	3	1	1	1	1	1	4	1	1	1	1	2
824	1032	8278950	131160446	131160446_1032	5	1	4	2	4	1	1	1	1	3	1	3	4	1	1	4	3	2	3	1	1	4	4	1	1	1	1	3	5	1	1	1	1	3	1	1	2	1	1
825	1291	10358867	131397690	131397690_1291	4	7	6	1	1	1	1	1	1	1	1	1	1	1	1	1	1	1	1	1	1	1	1	1	1	1	1	1	1	1	1	1	1	1	1	1	1	1	1
826	1578	12654333	131929062	131929062_1578	7	10	7	9	3	6	7	8	4	3	6	2	7	3	3	1	5	5	5	4	5	5	10	6	5	6	6	5	4	5	4	1	5	6	5	9	7	6	4
827	1593	12779350	131927780	131927780_1593	2	5	3	3	5	4	1	6	7	5	3	3	5	4	1	1	2	4	2	3	3	5	2	2	2	4	4	3	4	3	2	1	4	2	1	2	4	5	4
828	1629	13066067	131972580	131972580_1629	1	5	1	25	25	20	11	26	1	29	1	1	1	1	1	1	1	10	16	1	11	1	1	13	1	1	1	1	1	1	1	1	1	1	1	16	1	1	1
829	1590	12746667	131995026	131995026_1590	1	1	2	1	1	1	1	2	1	1	1	1	1	1	1	1	1	1	1	1	1	1	1	2	1	1	1	2	1	1	1	1	2	3	1	1	1	2	1
830	719	5764050	132036041	132036041_ 719	1	1	1	1	4	2	1	1	1	1	1	1	1	1	1	1	1	1	4	1	5	1	1	1	1	1	1	1	1	1	1	1	1	1	1	1	1	1	1
831	1503	12058017	132041290	132041290_1503	1	3	4	16	1	1	1	20	1	1	1	1	1	1	1	1	1	1	1	1	1	1	1	1	1	1	1	1	1	1	1	1	1	1	1	1	2	1	1
832	456	3663233	132042358	132042358_ 456	1	3	3	2	4	1	9	1	1	6	7	4	4	1	1	2	1	3	4	3	5	1	1	1	1	1	1	3	3	2	3	2	1	2	2	3	1	3	4
833	623	4996550	132046417	132046417_ 623	1	1	1	5	3	1	4	1	1	1	3	1	1	1	3	1	4	5	5	1	3	1	6	1	1	1	1	1	8	3	1	1	1	4	4	3	1	1	1
834	588	4717533	132066360	132066360_ 588	1	1	1	1	1	1	1	1	6	1	1	1	1	1	1	2	1	1	1	1	1	1	1	5	1	1	1	1	1	1	1	1	1	1	1	1	5	1	1
835	397	3189850	132079010	132079010_ 397	7	4	5	1	1	1	7	4	1	1	4	1	4	4	3	3	3	1	4	1	1	1	1	1	1	1	3	1	1	1	1	4	4	1	1	1	1	1	1
836	448	3592083	132079514	132079514_ 448	7	8	6	4	5	1	11	5	4	1	8	3	8	5	6	7	5	5	7	1	14	1	1	3	2	3	1	6	1	4	1	2	6	3	1	5	10	1	1
837	456	3663233	132080063	132080063_ 456	1	1	1	1	1	1	2	1	1	1	1	1	1	2	1	1	1	1	1	1	1	1	1	1	1	1	1	1	1	1	1	2	1	1	1	1	3	1	1
838	509	4080650	132079239	132079239_ 509	5	7	6	10	11	5	18	10	10	12	18	3	10	8	5	4	4	4	8	4	10	4	6	8	3	6	1	4	9	4	6	10	4	7	7	6	7	8	12
839	468	3755567	132080338	132080338_ 468	7	1	4	2	1	1	8	1	1	1	1	1	6	3	1	1	1	1	1	1	1	1	1	1	1	1	1	2	1	1	1	5	1	1	1	1	1	4	5
840	534	4282633	132078720	132078720_ 534	30	36	30	17	16	12	55	30	31	15	28	1	41	33	5	15	11	14	35	36	48	15	16	17	17	27	25	19	19	16	26	30	23	20	16	15	39	34	28
841	552	4430817	132079636	132079636_ 552	1	5	1	5	3	1	12	4	1	2	1	1	9	5	4	4	1	1	9	1	11	1	1	1	1	5	6	1	1	1	1	4	1	1	1	1	1	6	4
842	623	4996550	132078979	132078979_ 623	2	1	1	1	1	1	9	1	1	1	1	1	1	1	1	1	1	1	1	1	1	1	1	1	1	1	5	1	1	1	1	1	1	1	1	1	1	1	4
843	592	4748317	132080124	132080124_ 592	7	7	1	3	3	1	19	6	6	4	5	1	14	9	9	3	4	4	14	9	10	2	4	5	5	9	8	4	2	3	5	5	5	3	1	4	10	9	10
844	1340	10745617	132090500	132090500_1340	1	1	1	1	1	1	8	1	5	1	1	1	1	1	1	1	1	1	1	1	1	1	1	1	1	1	1	2	3	1	1	1	1	1	1	1	1	1	1
845	1291	10358867	132894211	132894211_1291	6	3	8	1	1	1	1	1	1	1	1	1	1	1	1	1	1	1	1	1	1	1	1	1	1	1	1	1	1	1	1	1	1	1	1	1	1	1	1
846	1634	13104533	132957260	132957260_1634	1	1	1	1	1	3	1	1	1	1	1	1	1	1	1	1	1	1	1	1	1	1	1	1	1	1	1	1	1	1	1	1	1	1	1	1	1	2	2
847	498	3996017	133066269	133066269_ 498	1	1	1	1	1	1	1	1	1	1	1	1	3	1	1	1	1	1	1	1	1	1	2	1	1	1	1	1	1	3	1	1	1	1	1	1	1	1	1
848	374	3003267	133074020	133074020_ 374	5	7	7	1	1	1	1	1	1	5	9	1	1	1	1	1	1	4	1	1	4	22	33	45	2	1	13	33	50	44	1	4	14	38	33	47	6	1	13
849	880	7060884	133085312	133085312_ 880	1	1	1	1	1	1	1	2	2	1	1	1	1	1	1	1	1	1	1	1	1	1	2	2	1	1	1	1	1	1	1	1	1	1	1	1	1	1	1
850	1078	8642517	133085220	133085220_1078	18	17	17	1	13	11	20	12	11	12	11	17	18	8	12	8	5	12	12	13	13	8	13	5	3	11	8	8	13	10	6	7	6	7	7	8	6	7	6
851	1170	9379517	133082458	133082458_1170	1	1	1	1	1	1	1	1	1	1	1	1	1	1	6	2	1	2	1	1	1	4	1	1	3	1	1	1	1	2	1	1	1	2	1	1	1	1	1
852	1300	10428117	133083832	133083832_1300	1	1	1	1	1	1	2	1	1	1	1	1	1	1	1	2	1	1	1	1	2	1	1	1	1	1	1	1	1	1	1	1	1	1	1	1	1	1	1
853	1323	10614800	133083633	133083633_1323	1	2	1	1	1	1	3	1	1	1	1	1	1	1	2	3	1	1	1	1	2	1	1	1	1	1	1	1	1	1	1	2	1	2	1	1	1	1	1
854	681	5462033	133099930	133099930_ 681	1	1	1	1	1	4	1	1	1	1	2	1	1	1	3	1	1	2	1	1	1	1	4	1	1	1	1	1	1	1	1	2	1	2	1	1	1	1	1
855	687	5508217	133098709	133098709_ 687	9	8	8	6	1	5	1	1	1	8	5	1	4	1	3	17	11	13	5	1	5	16	16	16	1	1	1	19	19	13	1	6	5	28	12	20	8	6	7
856	735	5896750	133098129	133098129_ 735	1	1	1	1	1	1	1	1	1	1	1	1	1	1	1	2	1	4	1	1	1	1	1	3	1	1	1	1	2	1	1	1	1	1	1	1	1	1	1
857	759	6091133	133099991	133099991_ 759	1	1	1	1	5	1	1	1	1	1	2	1	2	1	1	2	1	3	1	1	1	2	1	2	1	1	1	2	4	1	1	1	1	3	1	1	1	1	1
858	879	7053184	133098419	133098419_ 879	3	3	1	2	1	1	2	2	1	1	1	1	1	1	1	3	2	3	2	2	2	3	3	4	1	1	1	6	4	3	2	1	1	3	1	3	3	3	2
859	1044	8371300	133099289	133099289_1044	9	6	11	1	1	1	1	1	1	1	1	1	1	1	1	1	1	2	1	1	1	5	1	1	1	1	1	1	1	1	1	1	1	1	1	1	1	1	1
860	1164	9333350	133097687	133097687_1164	33	31	31	1	1	1	1	1	1	1	1	8	7	1	1	1	1	1	1	2	1	8	1	1	1	1	1	1	1	1	1	1	1	2	1	1	1	1	1
861	1209	9698816	133099640	133099640_1209	60	55	55	44	33	37	11	5	9	2	9	9	12	11	20	24	3	12	1	22	37	104	33	35	1	22	13	37	1	35	28	7	19	10	15	31	34	19	47
862	1222	9798950	133097794	133097794_1222	8	7	1	1	1	1	1	1	1	1	1	1	1	5	1	2	1	1	1	1	1	30	1	1	1	1	1	1	1	1	1	1	1	1	1	1	1	1	1
863	1325	10630183	133099792	133099792_1325	1	1	1	7	1	1	1	4	33	1	1	1	1	1	2	2	1	2	1	2	1	1	2	1	1	2	1	1	24	1	6	1	1	1	1	1	7	2	1
864	1337	10722533	133098160	133098160_1337	1	1	1	9	1	1	1	2	24	1	1	1	1	1	1	2	1	2	1	1	1	1	1	1	1	1	1	1	17	1	1	1	1	1	1	1	8	1	1
865	1393	11172816	133099640	133099640_1393	1	4	1	5	1	1	1	3	8	1	1	1	1	1	1	1	1	1	1	1	1	1	1	1	1	1	1	1	16	1	9	1	1	1	1	1	8	1	1
866	1591	12763967	133926712	133926712_1591	1	3	1	5	5	1	1	1	1	2	3	3	1	2	2	1	5	4	4	1	1	7	2	3	4	1	3	3	1	1	4	2	1	2	1	2	1	1	3
867	1580	12669717	133930283	133930283_1580	13	13	10	19	17	18	16	19	15	17	20	18	6	16	17	1	15	17	16	1	16	14	17	16	16	14	16	15	13	12	14	15	3	15	13	2	16	11	12
868	1631	13081450	133931061	133931061_1631	1	1	1	3	1	1	1	1	1	1	1	1	1	1	1	1	1	1	2	1	1	1	1	2	1	1	1	1	1	1	2	1	1	1	1	1	1	1	1
869	137	1102250	133967270	133967270_ 137	1	1	1	1	1	2	1	1	1	4	2	2	1	1	1	1	1	2	1	1	1	3	3	1	1	1	1	1	3	1	1	1	1	1	1	1	2	1	1
870	1578	12654333	133971542	133971542_1578	1	1	1	3	1	3	2	4	2	2	1	3	1	1	2	1	2	1	1	1	1	1	1	4	1	2	1	2	1	1	1	1	1	1	1	1	1	1	1
871	718	5756350	134054611	134054611_ 718	1	1	1	1	4	1	1	1	1	1	1	1	1	1	1	1	1	1	11	1	3	1	1	1	1	1	1	1	1	1	1	1	1	1	1	1	1	1	1
872	109	877000	134058090	134058090_ 109	1	1	8	1	4	1	1	9	1	5	11	1	7	1	1	1	8	2	1	1	1	1	8	2	1	1	1	9	14	8	1	1	1	11	1	7	1	1	1
873	140	1125417	134055069	134055069_ 140	1	1	1	1	1	1	1	4	1	1	1	1	1	1	1	1	4	1	1	1	1	1	3	1	1	1	1	4	4	1	1	1	1	3	1	4	1	1	1
874	390	3126383	134058411	134058411_ 390	10	10	9	10	9	1	20	8	7	7	10	5	11	9	8	4	3	5	10	7	11	2	3	1	3	8	5	4	8	1	4	8	7	3	1	3	7	8	5
875	583	4679050	134059830	134059830_ 583	1	1	1	4	1	1	1	1	1	1	2	1	1	1	1	2	1	1	3	1	1	1	4	6	1	1	1	6	7	1	1	1	1	4	1	2	1	2	1
876	492	3949850	134059357	134059357_ 492	1	1	3	2	2	1	7	6	1	1	7	1	5	1	1	3	4	5	5	1	4	1	4	5	1	1	2	1	2	1	1	2	2	1	1	5	1	1	1
877	598	4794483	134062103	134062103_ 598	1	1	1	1	1	1	2	2	1	1	1	1	1	1	1	1	1	1	1	1	1	1	1	1	1	1	1	1	3	1	1	1	1	1	1	1	1	2	1
878	561	4500083	134078491	134078491_ 561	1	1	1	1	1	1	1	1	1	1	1	1	1	1	1	1	1	1	1	1	1	1	1	2	1	1	1	1	3	1	1	1	1	1	1	3	1	1	1
879	375	3010967	134081360	134081360_ 375	1	1	1	1	1	1	1	1	1	1	1	1	1	1	1	1	1	1	1	1	1	1	1	1	1	1	1	1	1	5	1	1	1	1	4	5	1	1	1
880	1164	9333350	134097961	134097961_1164	3	4	7	4	1	3	1	1	1	1	1	1	1	1	1	1	1	1	1	1	1	7	1	1	1	1	1	1	1	1	1	1	1	1	1	1	4	1	4
881	1290	10341583	134273819	134273819_1290	6	5	6	1	1	1	1	1	1	1	1	1	1	1	1	1	1	1	1	1	1	1	1	1	1	1	1	1	1	1	1	1	1	1	1	1	1	1	1
882	1553	12452367	134999100	134999100_1553	1	1	1	1	1	1	1	1	1	3	1	1	1	1	1	1	1	1	1	1	2	1	1	1	1	2	1	1	1	1	1	1	1	1	1	1	1	1	1
883	397	3189850	135042831	135042831_ 397	42	45	48	4	1	1	102	40	55	8	8	5	159	113	108	30	13	12	153	126	182	38	35	34	69	128	98	50	49	17	128	151	108	59	27	25	175	162	138
884	441	3538217	135041290	135041290_ 441	2	1	1	1	1	1	1	1	1	1	1	1	2	1	1	1	1	1	1	1	1	1	1	1	1	1	1	1	1	1	1	1	1	1	1	6	1	2	1
885	225	1808467	135051895	135051895_ 225	1	1	1	1	1	1	7	3	1	1	1	1	1	1	1	1	1	1	1	1	1	1	2	1	1	1	1	1	1	1	1	1	1	1	1	1	1	1	1
886	812	6518233	135050278	135050278_ 812	1	1	1	1	1	1	1	1	1	1	1	1	2	1	1	1	1	1	1	1	1	1	1	2	1	1	1	1	1	1	1	1	1	1	1	1	1	2	1
887	455	3655533	135055496	135055496_ 455	10	13	11	1	1	2	1	1	1	9	17	10	13	5	8	14	16	18	15	10	1	13	19	30	1	7	10	27	29	14	1	13	15	19	18	24	13	10	21
888	489	3926767	135061676	135061676_ 489	1	1	2	1	1	1	1	1	1	1	9	1	1	1	3	8	4	4	1	1	1	1	6	8	1	1	1	1	11	1	1	1	1	1	1	3	1	1	1
889	498	3996017	135054291	135054291_ 498	1	1	1	1	1	1	1	1	1	1	1	1	1	1	1	2	2	2	1	1	1	1	1	2	1	1	1	1	1	1	1	1	1	1	1	1	1	1	1
890	902	7239950	135078629	135078629_ 902	12	11	8	9	10	5	18	6	7	8	14	1	17	8	11	11	8	11	11	6	12	7	1	15	3	6	5	11	8	1	7	8	6	15	7	1	12	6	8
891	913	7324600	135078430	135078430_ 913	6	5	6	1	1	1	4	1	1	1	2	1	3	1	1	1	1	3	1	1	2	1	1	2	1	1	1	2	1	1	1	1	1	1	2	1	1	3	1
892	1043	8363600	135078140	135078140_1043	8	9	1	1	1	1	1	1	1	1	1	3	1	1	1	1	1	11	1	1	1	1	10	15	1	1	1	1	8	7	1	1	1	3	8	1	1	1	1
893	358	2870467	135085770	135085770_ 358	3	1	1	1	1	1	1	1	1	1	1	1	1	1	1	2	1	2	1	1	1	1	2	4	1	1	1	1	5	1	1	1	1	1	1	1	1	1	1
894	459	3686317	135088760	135088760_ 459	1	1	4	1	1	1	1	1	1	1	1	1	4	1	1	3	1	2	4	1	4	1	1	1	1	1	1	1	3	1	1	1	3	1	1	1	4	4	1
895	569	4561633	135080597	135080597_ 569	5	1	4	1	4	1	1	1	1	1	1	2	3	1	3	1	1	1	1	1	4	3	5	6	1	1	1	1	1	3	1	5	2	1	1	5	4	5	3
896	802	6431600	135082169	135082169_ 802	2	1	1	2	3	1	1	1	1	1	11	3	1	1	1	2	2	5	1	1	1	1	1	1	1	1	1	1	1	1	1	1	1	1	1	1	1	1	1
897	373	2995583	135091156	135091156_ 373	1	1	1	1	1	1	1	1	1	1	1	1	1	1	1	2	1	2	1	1	1	1	1	4	1	1	1	1	5	1	1	1	1	1	1	1	1	1	1
898	686	5500517	135084671	135084671_ 686	1	1	1	1	1	1	1	1	1	1	1	1	1	1	1	2	1	1	1	1	1	1	1	1	1	1	1	1	2	1	1	1	1	1	3	1	1	1	1
899	902	7239950	135086502	135086502_ 902	1	1	1	1	1	1	1	1	1	1	1	7	1	1	3	1	1	1	1	1	1	1	6	1	1	1	1	1	3	11	1	1	1	1	1	3	1	6	1
900	587	4709833	135111557	135111557_ 587	1	1	1	1	1	1	1	1	1	1	1	1	1	1	1	1	1	2	1	1	1	1	1	3	1	1	1	4	1	1	1	1	1	4	1	1	1	1	1
901	698	5602450	135110870	135110870_ 698	1	1	1	1	1	1	1	1	1	1	1	1	1	1	1	1	1	2	1	1	1	1	1	1	1	1	1	3	4	1	1	1	1	1	1	1	1	1	1
902	894	7168700	135114304	135114304_ 894	8	6	5	2	1	1	1	3	1	1	2	3	1	2	1	4	4	4	2	4	3	1	4	6	1	1	1	1	5	3	3	1	1	3	1	4	1	3	1
903	1007	8076900	135114471	135114471_1007	1	4	5	1	1	1	1	1	1	1	1	1	1	1	1	3	1	7	1	1	1	1	1	1	1	1	1	1	1	1	1	1	1	1	3	1	1	1	1
904	1116	8954217	135114212	135114212_1116	10	8	1	1	1	1	1	1	1	1	1	1	1	2	1	1	1	1	1	1	1	7	1	1	1	1	1	1	1	1	2	1	1	1	1	1	1	1	1
905	1137	9115800	135115936	135115936_1137	93	84	92	1	1	1	1	1	1	1	1	4	12	15	9	3	1	1	1	1	1	16	1	1	1	1	1	1	1	1	2	1	1	1	1	1	1	1	1
906	1163	9325650	135112305	135112305_1163	50	46	47	1	1	1	1	1	1	2	1	1	1	1	1	1	1	1	1	1	1	82	1	1	1	1	1	1	4	3	1	2	1	1	1	1	1	1	1
907	1272	10203067	135114838	135114838_1272	149	142	151	7	2	1	1	1	1	13	15	12	18	1	21	2	2	2	1	2	2	47	1	1	1	1	1	1	31	2	2	2	1	1	1	1	20	1	1
908	1289	10333883	135115875	135115875_1289	145	106	157	24	16	10	30	17	18	35	77	94	53	41	52	19	12	7	18	10	11	177	12	15	6	15	9	14	39	1	21	11	1	13	9	11	13	11	11
909	1389	11142050	135114899	135114899_1389	9	11	11	29	3	1	3	16	32	1	1	1	3	1	8	2	1	2	1	4	1	16	1	2	1	3	2	1	33	1	30	2	1	3	1	1	19	1	1
910	1407	11280550	135115570	135115570_1407	1	1	1	2	1	1	1	1	8	1	1	1	1	1	1	1	1	1	1	1	1	1	1	1	1	1	1	1	1	1	2	1	1	1	1	1	1	1	1
911	1459	11700167	135116074	135116074_1459	1	16	1	9	1	1	3	11	9	2	1	1	1	1	15	1	1	1	1	1	1	1	1	1	1	1	1	1	7	1	12	1	1	1	1	1	14	1	1
912	1470	11784800	135115906	135115906_1470	17	22	13	20	13	9	21	21	25	13	15	19	18	1	21	1	10	12	7	17	16	10	8	8	2	12	5	10	9	11	18	1	7	1	8	2	18	10	17
913	687	5508217	135116257	135116257_ 687	5	5	6	1	1	1	1	1	1	1	1	1	1	1	2	1	10	8	1	1	1	10	9	14	1	1	3	15	10	8	2	3	1	21	11	15	3	4	7
914	759	6091133	135116638	135116638_ 759	1	3	1	6	13	1	1	1	1	5	11	7	1	1	1	5	7	3	1	1	1	5	6	8	1	1	1	5	3	5	1	1	1	4	1	4	1	1	1
915	1043	8363600	135115585	135115585_1043	8	13	12	2	1	1	1	1	1	1	1	1	1	1	1	6	7	6	1	1	2	12	1	10	1	1	1	1	1	3	1	1	1	2	1	3	1	1	1
916	1173	9412200	135116943	135116943_1173	33	25	30	3	1	1	2	1	3	23	22	38	57	53	51	2	1	3	1	1	1	105	2	2	1	1	1	1	1	3	5	5	1	1	1	1	1	3	2
917	1208	9691116	135115738	135115738_1208	25	18	23	1	1	1	1	1	1	1	1	1	1	1	1	2	1	1	1	1	1	22	1	1	1	1	1	1	1	1	1	2	1	1	1	1	1	1	1
918	1345	10784184	135117630	135117630_1345	2	1	3	3	1	1	1	1	1	1	1	1	1	1	1	2	1	1	1	1	1	1	1	1	1	1	1	1	16	1	1	1	1	1	1	1	1	1	1
919	1316	10551333	135116791	135116791_1316	6	3	5	6	1	1	1	2	18	1	3	1	3	1	1	2	1	1	1	2	1	5	1	1	1	1	1	1	18	1	6	2	1	1	1	2	4	1	1
920	873	7007017	135123428	135123428_ 873	1	1	1	1	1	1	4	1	1	1	1	1	1	1	1	2	1	3	1	1	1	1	1	1	1	1	1	1	6	1	1	1	1	5	1	1	1	1	1
921	1468	11769417	135118744	135118744_1468	1	1	1	3	1	1	1	1	1	1	1	1	1	1	1	1	1	1	1	1	1	1	1	3	1	1	1	1	1	1	1	8	1	1	6	1	1	1	1
922	1580	12669717	135926346	135926346_1580	8	7	7	2	14	13	10	10	11	13	11	12	12	10	11	1	13	1	12	11	12	11	2	11	12	11	12	6	10	8	1	1	7	5	8	10	8	9	8
923	1584	12700500	135925354	135925354_1584	1	1	1	1	4	1	1	3	1	1	1	1	2	1	2	1	1	1	1	1	1	1	1	5	2	2	2	1	3	1	1	1	1	1	2	1	2	5	1
924	1574	12623550	135967987	135967987_1574	1	1	1	1	1	2	1	2	2	1	2	1	1	1	1	1	1	1	2	2	1	1	1	1	1	1	1	1	1	1	1	1	1	1	1	1	1	1	1
925	1532	12290767	136018494	136018494_1532	1	1	2	3	1	2	1	1	1	1	1	2	1	1	1	2	1	1	1	1	1	1	1	1	1	1	1	1	1	1	1	2	1	1	1	1	1	1	2
926	1435	11505800	136025192	136025192_1435	3	1	1	2	1	1	1	1	1	1	1	1	1	1	1	1	1	1	1	1	1	1	1	1	1	1	1	1	1	1	1	2	1	1	1	1	1	1	2
927	545	4376867	136036499	136036499_ 545	7	5	1	1	1	1	1	1	1	1	1	1	18	8	12	1	1	1	41	34	27	3	1	1	36	84	16	3	1	1	27	40	6	1	1	1	5	1	1
928	1344	10776383	136033997	136033997_1344	1	1	1	1	1	3	2	1	1	1	1	1	1	1	1	1	1	1	1	1	1	1	1	1	1	2	1	1	1	1	1	1	5	1	1	1	1	1	1
929	399	3205233	136047287	136047287_ 399	1	1	1	1	1	1	1	1	1	1	1	1	1	4	1	1	1	1	6	1	1	1	1	1	8	12	1	1	1	2	1	8	2	1	1	1	1	1	1
930	396	3182150	136044159	136044159_ 396	3	2	4	1	1	1	13	2	7	1	1	1	11	12	6	1	1	1	12	6	17	1	1	1	5	18	9	1	5	4	1	17	12	4	1	1	14	1	10
931	627	5027317	136052139	136052139_ 627	1	1	1	1	1	1	1	1	1	1	2	1	1	1	1	1	1	1	1	1	1	2	1	1	1	3	1	1	1	1	1	1	1	2	1	1	1	1	1
932	835	6695317	136050797	136050797_ 835	1	1	2	1	1	1	1	1	1	1	1	1	1	1	1	1	1	1	1	1	1	2	1	2	1	1	1	1	1	1	2	1	1	1	1	1	1	1	1
933	902	7239950	136051056	136051056_ 902	22	22	25	32	56	39	30	16	19	26	44	33	37	16	19	27	1	1	12	10	10	17	14	29	3	15	1	10	24	9	5	6	1	12	7	5	3	5	1
934	1047	8394383	136051605	136051605_1047	25	23	26	15	20	12	39	22	22	15	28	1	33	12	20	30	32	24	25	23	24	30	29	40	1	23	19	18	40	14	9	17	7	20	12	13	1	20	11
935	1235	9908566	136051575	136051575_1235	32	29	35	26	41	40	49	29	26	20	27	29	51	17	27	25	29	17	18	22	30	25	26	2	8	33	24	23	32	15	14	20	11	17	13	16	18	23	14
936	1333	10691750	136051529	136051529_1333	31	32	31	38	54	49	65	40	36	27	37	37	56	10	37	24	36	15	28	28	36	26	27	38	9	35	21	25	35	18	17	20	16	27	17	18	16	22	18
937	1347	10799566	136051819	136051819_1347	1	1	2	1	1	1	1	1	1	1	4	1	2	1	1	1	3	1	5	1	1	1	1	1	1	7	1	1	3	1	3	1	1	1	1	1	1	1	2
938	106	853917	136060333	136060333_ 106	402	406	389	290	305	272	277	297	285	265	281	303	305	285	261	277	326	286	299	305	297	331	315	276	196	335	314	315	280	320	328	292	309	352	337	350	321	334	321
939	128	1032900	136060608	136060608_ 128	1	1	4	1	1	1	1	5	1	1	1	1	1	1	1	1	2	1	1	1	1	12	1	6	1	1	1	1	1	2	1	1	1	12	1	1	1	1	1
940	177	1419733	136062302	136062302_ 177	1	5	6	4	6	1	1	12	1	1	16	1	1	2	1	1	8	1	1	3	5	8	1	13	1	5	3	1	9	6	2	1	8	9	1	2	3	1	1
941	144	1156200	136060776	136060776_ 144	48	48	50	12	11	4	13	37	27	3	23	9	34	19	17	1	12	1	18	22	31	10	3	18	13	18	16	7	14	8	26	1	10	15	17	13	14	14	8
942	227	1823850	136061020	136061020_ 227	2	2	3	1	1	1	1	1	3	1	1	1	2	2	1	1	1	1	2	2	8	1	2	3	3	2	2	1	3	1	4	1	2	1	1	1	1	2	1
943	307	2468433	136060425	136060425_ 307	28	25	26	1	1	1	1	1	2	1	1	1	13	6	1	1	1	1	1	1	6	1	1	5	1	4	4	1	3	3	10	1	4	2	3	1	1	4	1
944	349	2801217	136060242	136060242_ 349	20	20	18	2	1	1	1	1	25	1	11	1	16	10	10	1	3	1	24	21	72	2	2	10	28	27	26	1	7	2	44	31	23	5	2	5	11	24	1
945	364	2926233	136062820	136062820_ 364	1	4	2	1	1	1	1	1	1	1	1	1	1	3	1	1	1	1	1	1	6	1	1	1	1	1	1	1	1	1	1	1	2	1	1	1	1	1	1
946	458	3678617	136072357	136072357_ 458	54	23	61	21	27	1	26	11	2	17	48	26	32	27	27	23	25	25	21	30	36	17	28	43	13	24	3	31	40	20	24	15	1	34	18	18	19	20	1
947	558	4477000	136069839	136069839_ 558	1	3	9	2	1	2	5	7	1	13	4	4	15	3	1	1	1	1	2	2	1	3	3	2	1	2	1	1	5	3	1	1	1	2	1	5	1	2	1
948	577	4632884	136070404	136070404_ 577	5	3	4	5	5	2	1	1	1	2	5	2	1	1	1	1	4	1	1	1	1	1	2	3	1	1	1	1	6	2	1	1	1	1	1	3	1	1	1
949	709	5687100	136068771	136068771_ 709	1	2	1	1	1	1	1	1	1	1	4	1	1	1	1	1	2	1	1	1	1	2	1	3	1	2	1	1	3	1	1	1	1	1	1	1	1	1	1
950	901	7232250	136068893	136068893_ 901	1	1	1	3	1	1	1	1	1	1	1	1	1	1	1	1	1	1	1	1	1	1	1	2	1	1	1	1	1	1	1	1	1	1	1	1	3	1	1
951	1204	9660334	136066071	136066071_1204	2	1	1	1	1	1	1	1	1	1	1	1	2	1	1	1	1	1	1	1	1	1	1	2	1	1	1	1	1	1	1	1	1	1	1	1	1	1	1
952	1232	9885484	136069641	136069641_1232	2	1	1	1	1	1	1	1	1	1	3	1	1	1	1	1	3	1	1	1	1	1	1	2	1	1	1	1	3	1	1	1	1	1	1	2	1	1	1
953	1319	10574417	136066467	136066467_1319	2	3	1	1	1	1	1	1	9	1	2	2	1	1	1	1	3	1	5	6	1	1	3	2	1	2	2	1	11	1	1	1	1	1	1	2	4	2	1
954	1337	10722533	136067474	136067474_1337	1	1	1	1	1	1	1	1	7	1	1	1	2	1	1	1	2	1	1	1	1	1	2	2	1	1	1	1	5	1	1	1	1	1	1	2	1	1	1
955	162	1304300	136073776	136073776_ 162	5	6	1	1	1	1	7	4	3	10	4	1	8	5	1	1	2	1	4	3	6	1	1	5	1	2	1	4	5	2	1	1	1	2	1	1	1	1	1
956	225	1808467	136073914	136073914_ 225	2	3	1	1	1	1	1	1	1	1	2	1	2	1	1	1	2	1	1	1	2	1	1	1	1	1	1	1	1	1	1	1	1	1	1	1	1	1	1
957	276	2220200	136071426	136071426_ 276	2	1	1	1	1	1	1	1	1	1	2	1	1	1	1	1	1	1	1	1	1	1	1	2	1	1	1	1	1	1	1	1	1	1	1	1	1	1	1
958	244	1964267	136073822	136073822_ 244	2	5	1	1	1	1	1	1	1	1	2	1	5	1	1	1	2	1	1	2	1	1	1	3	1	1	1	1	4	1	1	1	1	1	1	3	1	1	1
959	378	3034050	136072372	136072372_ 378	1	1	1	1	4	2	12	1	1	1	1	1	2	1	1	1	1	1	1	1	1	1	1	2	4	1	4	5	11	8	1	1	1	4	2	2	1	7	7
960	386	3095617	136074524	136074524_ 386	78	78	79	41	36	25	102	65	66	36	62	22	99	74	66	38	40	36	75	62	84	37	46	58	37	58	58	50	66	40	65	64	57	44	40	45	80	61	69
961	431	3461267	136074127	136074127_ 431	40	42	44	19	23	16	76	39	40	20	30	12	72	56	42	21	19	16	49	39	61	18	18	33	25	38	39	29	29	20	43	39	39	30	15	18	51	49	43
962	468	3755567	136075104	136075104_ 468	23	9	10	3	11	8	14	4	6	13	4	4	15	9	9	1	12	1	11	8	8	9	3	14	4	7	3	14	8	11	3	1	7	5	6	15	11	7	1
963	531	4259533	136077698	136077698_ 531	1	2	1	1	1	1	1	1	1	1	2	1	1	1	1	1	1	1	1	1	1	1	1	1	1	1	1	1	2	1	1	1	1	1	1	1	1	1	1
964	691	5548584	136071060	136071060_ 691	1	2	1	1	1	1	1	1	1	1	5	1	1	1	1	1	3	1	1	1	1	1	1	3	1	1	1	1	3	1	1	1	1	1	1	1	1	1	1
965	1342	10761000	136079758	136079758_1342	1	1	1	1	1	1	1	1	1	1	1	1	2	1	1	1	1	1	1	1	1	1	1	2	1	1	1	1	1	1	3	1	1	1	1	1	1	1	1
966	1138	9123500	136118408	136118408_1138	9	11	13	1	1	1	1	1	1	1	1	3	4	7	3	1	1	1	1	1	1	11	1	1	1	1	1	1	1	1	1	1	1	1	1	1	1	1	1
967	1270	10187683	136119766	136119766_1270	1	17	1	1	1	1	1	1	2	1	3	1	1	1	1	1	1	1	1	1	1	1	1	1	1	1	1	1	1	1	1	1	1	1	1	1	1	1	1
968	1272	10203067	136118408	136118408_1272	18	14	16	1	1	1	1	1	3	3	10	10	1	5	1	1	1	1	1	1	1	20	1	1	1	1	1	1	1	1	1	1	1	1	1	1	2	1	1
969	1381	11080483	136117615	136117615_1381	1	1	1	2	1	1	1	1	1	1	1	1	1	1	1	1	1	1	1	1	1	1	1	1	1	1	1	1	1	1	3	1	1	1	1	1	4	1	1
970	547	4392250	137035812	137035812_ 547	1	1	1	1	1	1	1	1	1	1	1	1	1	1	1	1	1	1	3	3	1	1	1	1	1	7	1	1	1	1	1	1	1	1	1	1	1	1	1
971	136	1094550	137047729	137047729_ 136	6	5	10	1	1	1	8	5	4	1	1	1	6	1	3	1	1	1	13	1	1	1	1	1	1	1	1	1	1	1	1	1	1	1	1	1	1	1	1
972	389	3118700	137051056	137051056_ 389	1	4	1	1	1	1	1	1	1	1	1	1	1	1	3	3	4	4	1	1	1	1	1	1	1	1	1	1	1	1	1	1	1	1	1	1	1	1	1
973	459	3686317	137049713	137049713_ 459	1	5	1	1	1	1	5	1	1	1	1	1	1	1	1	1	1	1	1	1	1	2	1	1	1	1	1	1	1	1	1	1	1	1	1	1	1	1	1
974	903	7247650	137053131	137053131_ 903	1	2	1	1	3	3	1	1	1	2	1	3	1	1	1	1	1	1	1	1	1	1	1	1	1	1	1	1	1	1	1	1	1	1	1	1	1	1	1
975	1234	9900884	137050735	137050735_1234	3	1	1	1	1	1	1	1	3	1	1	1	3	1	1	1	3	1	1	1	1	1	1	1	1	1	1	1	3	1	1	1	1	1	1	1	1	1	1
976	728	5842900	137058685	137058685_ 728	2	2	2	3	2	1	4	1	1	1	5	3	1	1	1	1	1	3	4	1	4	1	3	4	1	4	1	1	3	1	1	1	1	2	1	1	1	1	4
977	818	6564500	137057922	137057922_ 818	4	6	3	2	4	3	4	1	1	1	7	4	3	2	2	2	1	1	3	1	6	1	3	3	1	3	1	1	2	3	1	1	1	3	1	3	4	1	1
978	1178	9450684	137056046	137056046_1178	1	2	1	1	3	1	1	1	1	2	1	1	1	1	3	1	1	1	1	1	1	1	1	1	1	1	1	1	1	1	1	1	1	1	1	1	1	1	1
979	1339	10737917	137057785	137057785_1339	1	3	1	4	2	1	2	1	1	1	1	1	4	1	3	1	1	1	1	1	1	1	1	1	1	1	1	1	1	1	1	1	1	1	1	1	1	2	1
980	141	1133117	137063599	137063599_ 141	6	6	1	1	1	1	1	1	1	1	1	1	1	1	1	1	1	1	1	1	1	1	1	1	1	29	1	1	1	1	1	23	1	1	1	1	1	1	1
981	107	861617	137062973	137062973_ 107	39	30	3	21	24	17	1	1	2	24	28	1	1	21	19	16	1	24	1	22	42	21	26	23	1	18	24	21	28	23	24	12	23	26	25	27	26	27	1
982	524	4205683	137061401	137061401_ 524	1	4	1	1	1	1	5	1	2	1	1	1	1	1	3	1	1	1	1	1	1	1	1	3	1	1	1	1	1	1	1	1	1	1	1	1	1	1	1
983	631	5067700	137066193	137066193_ 631	3	2	1	1	1	1	14	6	4	1	1	1	1	1	1	3	1	2	5	1	6	1	1	1	1	3	1	1	1	1	1	1	1	1	1	2	1	3	1
984	387	3103300	137077423	137077423_ 387	7	8	7	1	1	1	10	1	3	1	1	1	5	8	3	1	1	1	1	4	9	1	1	1	1	7	6	1	2	1	1	1	2	1	1	1	7	3	7
985	400	3212933	137076630	137076630_ 400	4	5	4	6	3	1	7	6	8	3	7	1	7	6	7	6	4	4	6	6	5	1	1	1	2	6	10	2	6	1	5	1	8	9	3	4	12	11	11
986	458	3678617	137077621	137077621_ 458	5	4	4	1	1	3	10	5	5	1	5	1	17	13	7	4	3	2	1	3	5	3	3	2	8	10	1	3	6	1	2	1	7	2	1	1	8	12	9
987	1330	10668667	137080002	137080002_1330	1	1	1	4	1	1	1	1	1	1	1	1	1	1	1	1	1	1	1	1	1	1	1	1	1	1	1	1	7	1	2	1	1	1	1	1	3	1	1
988	619	4965766	137093994	137093994_ 619	13	11	12	11	14	7	1	1	1	16	31	15	5	1	1	17	19	15	4	1	3	15	14	20	1	1	1	16	20	12	1	4	2	10	10	6	2	2	1
989	757	6075733	137091919	137091919_ 757	1	1	1	2	3	3	1	1	1	1	3	1	1	1	1	1	1	1	1	1	1	1	1	1	1	1	1	1	1	1	1	1	1	2	1	1	1	1	1
990	816	6549016	137093155	137093155_ 816	1	1	1	2	6	3	1	2	1	1	4	1	1	1	1	1	1	2	1	1	1	1	1	1	1	1	1	1	2	1	1	1	1	1	1	1	1	1	1
991	1163	9325650	137096222	137096222_1163	12	11	1	1	1	1	1	1	1	1	1	1	1	1	1	1	1	1	1	1	1	3	1	1	1	1	1	1	1	1	1	1	1	1	1	1	1	1	1
992	1208	9691116	137090897	137090897_1208	10	10	14	1	1	1	1	1	1	1	1	1	1	1	1	1	1	1	1	1	1	27	1	1	1	1	1	1	1	1	1	2	1	1	1	1	1	1	1
993	1338	10730217	137090118	137090118_1338	1	1	1	4	1	1	1	1	13	1	1	1	1	1	1	1	1	1	1	1	1	1	1	1	1	1	1	1	10	1	1	1	1	1	1	1	5	1	1
994	193	1552450	137103989	137103989_ 193	4	1	4	1	1	1	9	6	4	1	1	1	8	1	1	1	1	2	8	7	10	1	1	2	1	1	1	1	1	1	1	2	3	1	1	1	4	3	8
995	403	3236017	137099869	137099869_ 403	1	1	1	1	1	1	1	1	2	1	1	1	1	1	1	2	1	1	1	1	1	1	1	3	1	1	1	2	1	1	3	6	3	1	1	1	1	1	1
996	688	5515900	137097702	137097702_ 688	1	1	1	3	2	1	1	1	1	3	1	1	1	1	1	3	1	3	1	1	1	4	2	4	1	1	1	1	6	3	1	1	1	8	4	4	1	2	2
997	1044	8371300	137096710	137096710_1044	4	7	4	1	1	1	1	1	1	1	1	1	1	1	1	1	1	3	1	1	1	1	1	4	1	1	1	1	1	3	1	1	1	1	1	1	1	1	1
998	112	900083	137106125	137106125_ 112	1	1	1	1	1	1	19	9	1	1	1	1	12	1	1	1	1	1	10	9	15	1	1	1	1	1	1	1	1	1	1	1	1	1	1	1	9	1	10
999	188	1513967	137106476	137106476_ 188	1	1	1	1	1	1	1	1	1	1	1	1	1	1	1	1	1	1	1	4	6	1	1	1	1	1	1	1	1	1	1	2	1	1	1	1	1	1	5
1000	275	2212500	137108154	137108154_ 275	4	1	1	1	1	1	1	1	1	1	1	1	6	1	1	1	1	3	2	1	1	1	1	1	1	1	1	1	1	1	1	1	1	1	1	1	1	1	1
1001	286	2297150	137106384	137106384_ 286	6	7	4	1	3	1	9	1	4	5	1	1	6	8	1	2	1	5	7	1	1	2	2	1	1	6	1	4	6	1	1	3	3	5	1	5	1	1	1
1002	1213	9729600	137111542	137111542_1213	1	1	7	1	1	1	2	1	1	1	1	1	2	1	1	1	1	1	1	1	1	1	1	1	1	1	1	1	1	1	1	1	1	1	1	1	1	1	1
1003	917	7355367	137121094	137121094_ 917	2	3	1	1	1	1	1	1	1	1	1	1	1	1	1	1	1	1	1	1	1	1	1	1	1	1	1	1	1	1	1	1	1	1	1	1	1	1	2
1004	1043	8363600	137125885	137125885_1043	5	8	5	1	1	1	1	1	1	1	1	1	3	1	1	1	1	1	1	1	1	1	1	1	1	1	1	1	1	1	1	1	1	1	1	1	1	1	1
1005	1164	9333350	137129898	137129898_1164	32	32	35	3	1	1	1	2	8	1	1	1	9	10	6	3	1	1	2	1	1	39	1	2	1	1	1	1	11	1	3	3	1	1	1	1	1	1	1
1006	1289	10333883	137131607	137131607_1289	39	41	40	7	1	1	4	1	13	6	2	17	8	6	11	2	3	2	5	4	1	60	3	2	1	2	1	2	14	1	7	2	1	3	1	4	5	4	1
1007	1209	9698816	137136093	137136093_1209	7	9	9	1	1	1	1	1	1	1	1	1	1	1	1	1	1	1	1	1	1	14	1	1	1	1	1	1	4	1	1	1	1	1	1	1	1	1	1
1008	1331	10676350	137133118	137133118_1331	1	1	1	1	1	1	1	1	2	1	1	1	1	1	1	1	1	1	1	1	1	1	1	1	1	1	1	1	4	1	1	2	1	1	1	1	1	1	1
1009	1387	11126650	137131958	137131958_1387	4	1	5	8	1	1	1	5	10	1	1	1	3	1	2	2	1	2	1	3	1	1	2	4	1	2	1	1	16	1	13	2	3	1	1	1	8	1	1
1010	1469	11777117	137131058	137131058_1469	1	1	6	5	1	1	1	1	1	1	1	1	2	1	7	2	1	1	1	1	1	1	1	1	1	1	1	1	1	1	4	2	1	1	1	1	3	1	1
1011	1468	11769417	137132675	137132675_1468	6	1	7	4	8	1	7	7	1	5	6	9	7	1	9	3	5	2	3	5	1	1	1	1	1	3	1	3	3	4	5	4	1	1	1	8	8	1	7
1012	1579	12662033	137927017	137927017_1579	1	1	1	4	1	1	1	1	1	1	1	1	1	1	1	1	4	1	1	1	3	1	1	1	1	4	1	1	1	1	1	1	1	1	1	1	1	1	3
1013	1567	12569683	137966263	137966263_1567	8	1	4	10	10	7	9	10	8	8	10	8	7	8	9	1	1	1	9	8	10	11	1	9	1	7	12	4	1	9	6	1	9	8	11	7	7	9	7
1014	1643	13173783	137978973	137978973_1643	1	1	1	10	1	3	1	1	1	1	3	1	7	1	1	1	1	1	1	1	1	1	1	1	1	1	1	1	1	3	3	11	2	3	1	1	1	5	2
1015	139	1117733	138029037	138029037_ 139	1	1	1	1	1	1	1	1	1	3	5	1	1	1	2	2	1	3	1	1	6	1	1	4	1	1	4	1	1	1	3	1	2	1	1	1	3	1	1
1016	1338	10730217	138040039	138040039_1338	1	1	1	1	1	1	4	1	1	1	1	1	3	1	1	1	1	1	1	1	1	1	1	1	1	9	1	1	1	1	1	1	1	1	1	1	1	1	1
1017	299	2397183	138054382	138054382_ 299	17	16	18	37	39	22	1	1	1	1	16	1	1	1	1	2	1	1	1	1	3	1	1	1	1	1	1	1	1	1	1	1	1	1	1	1	1	1	1
1018	901	7232250	138049637	138049637_ 901	10	8	6	13	15	12	8	5	6	8	13	1	11	6	6	9	9	4	1	1	4	6	5	4	1	1	1	1	8	3	1	1	1	1	2	5	1	1	1
1019	1048	8402083	138049377	138049377_1048	7	10	12	5	1	5	1	6	5	3	6	7	8	1	6	12	8	1	7	8	1	9	1	1	1	10	5	6	12	5	6	7	2	8	6	4	6	5	1
1020	1235	9908566	138048004	138048004_1235	9	10	10	7	5	9	15	1	10	5	12	8	11	3	5	1	5	9	8	9	9	8	8	10	3	8	1	7	11	4	5	7	1	1	5	1	5	5	1
1021	1334	10699433	138048691	138048691_1334	11	7	10	13	19	17	22	10	11	7	11	7	19	3	10	8	8	4	7	7	12	12	8	10	3	1	3	6	13	5	6	7	4	1	1	4	3	8	5
1022	489	3926767	138058273	138058273_ 489	1	3	3	2	1	1	1	1	1	1	1	1	1	1	1	2	1	4	1	1	1	1	1	5	1	1	1	1	5	1	1	1	1	4	3	1	1	1	1
1023	1511	12119583	138080780	138080780_1511	1	2	1	1	1	1	3	1	1	1	1	1	1	1	1	1	1	1	1	1	1	1	1	1	1	2	1	1	1	3	1	1	1	1	1	3	1	1	1
1024	357	2862767	138090500	138090500_ 357	1	1	6	2	1	1	1	10	1	1	7	1	10	1	1	1	1	5	7	7	7	1	5	1	2	1	3	1	1	1	1	1	1	1	1	1	1	4	1
1025	411	3297667	138090866	138090866_ 411	18	20	22	24	19	12	77	36	36	22	27	15	54	44	37	18	22	20	50	36	59	15	1	25	22	31	31	26	28	1	1	40	33	25	15	1	1	38	41
1026	467	3747883	138089325	138089325_ 467	1	3	2	1	1	1	1	1	1	1	13	5	1	1	1	1	4	4	1	1	1	1	1	16	1	1	1	1	27	12	1	1	1	8	11	1	1	1	1
1027	473	3794050	138089691	138089691_ 473	4	4	5	2	1	2	1	1	1	4	22	5	1	1	1	3	7	9	1	1	1	6	13	20	1	1	1	7	30	15	1	1	1	10	14	13	1	1	1
1028	500	4011400	138088028	138088028_ 500	1	1	1	1	1	1	1	1	1	1	6	1	1	1	1	1	1	1	1	1	1	1	3	5	1	1	1	1	11	2	1	1	1	2	1	1	1	1	1
1029	604	4850250	138089828	138089828_ 604	3	7	5	2	1	1	6	1	1	1	3	1	1	1	1	3	3	3	5	1	9	3	4	8	1	4	1	4	7	4	1	3	5	1	1	4	3	3	5
1030	711	5702483	138090210	138090210_ 711	1	1	2	2	1	1	1	1	1	2	5	6	1	1	1	1	1	2	1	1	1	1	1	1	1	1	1	1	1	1	1	1	1	1	1	1	1	1	1
1031	778	6237333	138091034	138091034_ 778	1	1	1	1	1	1	1	1	1	1	1	1	1	1	1	3	5	4	1	1	1	4	5	9	1	1	1	5	6	1	1	1	1	1	1	4	1	1	1
1032	1350	10822650	138089355	138089355_1350	1	1	1	2	1	1	1	1	1	1	1	1	1	1	1	2	1	1	1	1	1	1	1	1	1	1	1	1	4	1	1	1	1	1	1	1	1	1	1
1033	1420	11390284	138088943	138088943_1420	5	4	5	1	1	1	1	1	1	1	9	7	9	1	1	3	6	6	1	7	7	3	3	1	2	3	1	6	5	1	4	3	1	9	1	1	2	3	1
1034	642	5152350	138092682	138092682_ 642	1	1	1	1	1	1	1	1	1	1	1	1	1	1	1	1	1	4	1	1	1	1	4	1	1	1	1	1	3	1	1	1	1	1	1	1	5	1	1
1035	1507	12088800	138093124	138093124_1507	2	1	1	1	1	1	1	1	1	3	1	5	1	1	1	1	1	3	1	1	4	1	3	1	1	1	1	1	3	1	2	4	1	1	1	2	1	3	1
1036	1424	11421150	138099838	138099838_1424	1	1	1	1	1	1	1	1	1	1	1	1	1	1	4	1	2	1	5	1	1	1	1	1	1	1	1	1	1	1	1	1	1	1	1	1	1	1	4
1037	459	3686317	138126724	138126724_ 459	10	15	13	1	4	1	18	8	10	5	7	4	17	12	8	1	2	1	12	9	15	1	1	7	1	13	5	9	11	5	12	12	10	12	8	9	15	15	15
1038	470	3770967	138126648	138126648_ 470	79	80	84	44	41	32	84	67	62	44	62	37	88	69	62	44	45	32	74	66	96	35	50	52	39	64	60	52	54	39	61	65	57	45	38	51	82	70	70
1039	488	3919067	138126785	138126785_ 488	60	53	59	33	31	19	74	59	48	41	42	3	68	57	52	35	25	6	58	45	55	24	32	37	22	43	35	34	43	26	39	33	42	37	30	36	51	49	52
1040	502	4026800	138123962	138123962_ 502	1	1	1	1	1	1	5	1	1	1	1	1	1	1	2	1	1	1	4	1	1	1	1	1	1	1	1	1	1	1	1	1	1	3	1	1	4	2	4
1041	1290	10341583	138138397	138138397_1290	1	4	3	1	1	1	1	1	1	1	1	1	1	1	1	1	1	1	1	1	1	10	1	1	1	1	1	1	1	1	1	1	1	1	1	1	1	1	1
1042	1163	9325650	138137527	138137527_1163	1	4	4	1	1	1	1	1	1	1	1	1	1	1	1	1	1	1	1	1	1	3	1	1	1	1	1	1	1	1	1	1	1	1	1	1	1	1	1
1043	1564	12546600	138963455	138963455_1564	1	1	1	2	1	1	1	1	3	1	1	1	1	1	1	1	1	1	1	1	3	2	1	1	1	1	2	1	1	1	1	1	1	1	1	1	1	1	1
1044	1662	13329583	138977524	138977524_1662	1	1	1	1	1	1	3	5	1	1	1	1	7	1	1	1	1	1	1	3	1	2	1	3	1	1	8	1	4	1	1	1	1	1	1	1	1	1	1
1045	763	6121900	138994095	138994095_ 763	1	1	1	1	1	1	1	1	1	1	1	1	1	2	1	1	1	1	1	1	1	1	1	1	1	1	1	2	1	1	1	1	1	1	1	2	1	1	1
1046	1621	13004500	138994919	138994919_1621	1	5	2	4	12	10	8	1	16	9	8	6	11	9	11	1	4	2	2	4	1	3	1	4	4	5	7	2	1	2	4	1	6	6	6	4	3	5	7
1047	1109	8890750	139002213	139002213_1109	4	7	4	1	4	6	1	6	2	3	1	4	3	3	3	1	1	1	1	1	1	1	5	2	1	4	2	2	4	2	3	1	1	1	1	1	5	2	3
1048	1183	9489150	139002625	139002625_1183	2	4	3	1	7	6	10	1	7	1	4	2	5	4	5	1	2	1	1	4	3	3	5	4	3	4	5	1	2	3	1	1	2	4	1	3	1	4	3
1049	1666	13360367	139000381	139000381_1666	1	1	1	1	1	1	1	1	1	1	1	5	1	1	1	1	7	1	1	1	1	1	1	1	1	1	1	1	1	1	1	1	1	3	1	2	1	1	1
1050	601	4827167	139012238	139012238_ 601	1	1	1	1	2	1	1	1	2	5	8	3	1	1	1	1	5	1	1	1	1	1	1	1	1	1	1	1	1	2	1	1	1	2	1	1	1	1	1
1051	952	7634383	139010834	139010834_ 952	1	1	1	1	1	1	1	1	1	2	1	1	1	1	1	1	1	1	1	1	1	1	1	1	1	1	1	1	1	1	1	1	1	1	2	1	1	2	1
1052	1646	13196867	139010422	139010422_1646	3	4	1	1	1	9	1	1	1	1	5	3	1	3	3	1	3	1	2	1	2	3	5	6	1	4	4	3	1	4	2	1	3	4	4	2	2	1	1
1053	697	5594750	139017563	139017563_ 697	1	1	2	1	1	1	1	1	1	2	1	1	1	1	1	1	1	1	1	1	2	1	1	1	1	1	1	1	1	3	1	1	1	1	1	1	3	1	1
1054	883	7084050	139018829	139018829_ 883	1	1	1	1	1	1	1	1	1	2	1	1	1	1	1	1	1	1	1	1	1	2	1	1	1	1	1	1	1	1	2	1	1	1	1	2	1	1	1
1055	1591	12763967	139019257	139019257_1591	1	3	1	1	1	1	1	1	1	1	1	1	2	1	1	1	1	1	1	1	1	1	1	1	1	2	1	1	1	2	1	1	3	1	1	1	2	3	1
1056	813	6525933	139073090	139073090_ 813	4	1	5	7	19	10	1	1	1	4	1	6	2	1	1	3	4	3	1	1	3	3	1	3	1	1	1	2	5	1	1	1	1	1	1	1	1	1	1
1057	292	2343317	139086243	139086243_ 292	3	1	1	1	1	1	1	1	1	1	1	1	4	4	1	1	1	1	1	1	3	1	1	1	1	4	1	2	1	1	1	6	1	1	1	1	5	4	5
1058	684	5485133	139085968	139085968_ 684	1	1	3	1	1	1	1	1	1	1	1	1	1	1	1	1	1	2	1	1	1	1	1	2	1	1	1	1	1	1	1	1	1	1	1	1	1	1	1
1059	814	6533633	139078613	139078613_ 814	1	6	1	1	1	1	1	1	1	1	10	1	1	1	1	1	1	1	1	1	1	1	1	1	1	1	1	1	2	1	1	1	1	1	1	1	1	1	1
1060	1292	10366567	139091034	139091034_1292	1	1	1	1	1	1	1	1	1	1	1	1	1	3	1	1	1	1	2	1	1	1	1	1	1	2	1	1	1	1	1	1	1	1	1	1	1	1	1
1061	108	869300	139095352	139095352_ 108	1	1	1	1	1	1	9	1	1	1	1	1	8	7	5	1	1	1	7	7	8	1	1	1	4	1	1	1	1	1	8	10	3	1	1	1	11	13	4
1062	402	3228317	139097336	139097336_ 402	9	13	13	1	1	1	24	5	11	1	3	1	30	23	18	1	1	1	7	12	12	3	4	8	11	20	22	11	11	4	26	17	19	20	6	1	24	44	50
1063	448	3592083	139094635	139094635_ 448	2	4	1	1	1	1	6	1	1	1	1	1	7	4	1	1	1	1	2	4	7	1	1	2	4	7	3	1	5	1	13	26	31	9	10	1	30	1	32
1064	449	3599767	139092712	139092712_ 449	1	1	1	1	1	1	6	3	1	1	1	1	6	4	1	1	1	1	3	1	4	1	1	3	1	4	3	4	3	2	2	4	5	1	1	1	1	9	9
1065	1469	11777117	139099442	139099442_1469	1	1	1	1	1	1	1	1	1	5	1	1	1	1	5	1	1	1	1	1	1	1	1	2	2	1	1	1	1	1	4	1	1	1	1	1	1	1	1
1066	320	2568467	139099106	139099106_ 320	1	1	1	1	1	1	1	1	1	1	1	1	1	1	1	1	1	1	1	1	1	1	1	1	1	1	1	1	1	1	1	1	1	1	1	1	2	2	3
1067	698	5602450	139107376	139107376_ 698	1	1	1	1	1	1	1	1	1	1	7	2	1	2	1	2	1	1	1	1	1	1	1	1	1	1	1	5	1	1	2	1	1	1	1	2	1	1	1
1068	979	7851750	139109650	139109650_ 979	6	8	9	1	1	1	1	1	1	1	3	6	4	1	1	1	1	1	1	1	1	1	1	1	1	1	1	1	1	1	1	1	1	1	1	1	1	1	1
1069	1168	9364133	139107651	139107651_1168	15	13	11	1	1	1	1	1	1	1	1	1	1	1	1	1	1	1	1	1	1	38	1	1	1	1	1	1	1	1	1	1	1	1	1	1	1	1	1
1070	469	3763267	139114914	139114914_ 469	1	1	1	1	1	1	4	1	1	1	1	1	1	6	8	1	1	1	1	1	1	2	1	1	1	1	1	1	1	1	1	1	5	1	1	1	1	1	3
1071	1032	8278950	139109467	139109467_1032	2	2	1	1	1	1	1	1	1	1	1	1	1	1	1	1	1	1	1	1	1	5	1	1	1	1	1	1	1	1	1	1	1	1	1	1	1	1	1
1072	1137	9115800	139111801	139111801_1137	78	76	81	1	1	1	1	1	1	19	19	33	50	54	37	1	1	1	1	1	1	49	1	1	1	1	1	1	1	1	1	1	1	1	1	1	1	1	1
1073	1272	10203067	139112061	139112061_1272	116	114	109	9	12	7	15	1	18	35	54	85	44	32	40	12	1	9	11	5	12	81	8	6	1	7	6	8	19	2	10	2	3	4	1	5	7	10	6
1074	1288	10326183	139110474	139110474_1288	69	70	73	2	1	1	1	1	11	8	11	9	1	1	10	2	1	2	3	1	1	85	1	1	1	1	1	1	1	3	3	1	1	2	1	1	1	1	1
1075	1383	11095866	139112000	139112000_1383	1	1	4	9	1	1	1	4	14	1	1	1	1	3	2	1	1	2	2	1	1	6	2	1	1	1	1	1	15	1	13	2	1	1	1	1	9	2	1
1076	1392	11165133	139111221	139111221_1392	1	1	1	2	1	1	1	1	8	1	1	1	1	1	1	1	1	1	1	1	1	1	1	1	1	1	1	1	11	1	8	1	1	1	1	1	6	1	1
1077	1473	11817483	139110657	139110657_1473	10	8	8	6	6	1	8	4	8	7	9	8	7	1	6	7	1	2	3	9	1	1	1	3	1	8	1	1	5	6	4	2	1	2	1	7	8	5	6
1078	1477	11848267	139112656	139112656_1477	1	4	5	1	1	1	1	7	1	1	1	3	1	1	8	1	1	1	1	1	1	1	1	1	1	1	1	1	1	1	1	1	1	1	1	1	2	2	1
1079	335	2693483	139119141	139119141_ 335	1	1	1	1	1	1	5	4	2	1	1	1	1	2	1	1	1	1	2	1	4	1	1	1	1	1	1	1	1	1	1	1	1	1	1	1	1	1	3
1080	350	2808900	139121811	139121811_ 350	211	199	218	63	73	33	339	126	185	152	206	93	307	200	165	178	162	195	253	152	297	84	184	298	78	161	108	209	314	96	109	151	119	242	137	219	188	142	191
1081	1209	9698816	139115250	139115250_1209	15	7	12	1	1	1	1	1	1	1	1	1	1	1	1	1	1	1	1	1	1	11	1	1	1	1	1	1	1	1	1	1	1	1	1	1	1	1	1
1082	469	3763267	139129974	139129974_ 469	6	8	9	3	4	1	10	5	5	3	5	1	10	3	5	4	3	4	4	5	10	1	4	5	3	6	6	6	5	1	8	8	6	3	3	4	7	5	10
1083	488	3919067	139129715	139129715_ 488	6	5	5	1	1	1	7	3	1	1	4	1	6	1	3	3	1	2	1	1	8	1	1	1	1	3	4	3	3	1	5	4	1	1	2	3	4	1	1
1084	1399	11219000	139127686	139127686_1399	1	1	2	1	1	1	1	3	1	1	1	1	1	1	1	1	1	1	1	1	2	1	1	1	1	1	1	1	1	1	1	1	1	1	1	1	1	1	1
1085	1164	9333350	139147675	139147675_1164	8	7	7	1	1	1	1	1	1	1	1	1	3	1	1	1	1	1	1	1	1	4	1	1	1	1	1	1	1	1	1	1	1	1	1	1	1	1	1
1086	1077	8634817	139975998	139975998_1077	2	1	2	1	1	1	1	1	1	1	1	1	2	1	1	3	1	1	1	1	1	1	1	1	1	1	1	1	1	1	1	1	1	4	1	1	1	1	1
1087	1172	9404500	139987671	139987671_1172	1	3	1	1	3	1	1	1	4	3	1	1	5	7	1	8	1	4	1	7	1	1	3	4	4	1	3	1	1	1	1	5	1	2	1	2	1	1	2
1088	1579	12662033	139987671	139987671_1579	107	80	76	206	191	173	177	176	176	167	163	155	186	174	181	172	164	167	169	167	155	162	158	164	159	152	157	126	130	132	137	132	121	120	122	117	121	128	118
1089	1582	12685117	139986588	139986588_1582	1	17	24	1	39	11	33	26	1	23	196	187	1	1	24	1	1	1	23	23	15	26	1	35	56	1	28	19	16	11	24	21	3	33	27	8	92	1	24
1090	1650	13227650	139987579	139987579_1650	1	5	6	1	16	1	17	1	1	14	1	1	1	1	1	1	1	8	1	1	1	1	14	16	15	1	1	1	1	1	9	10	1	8	1	1	11	1	10
1091	1683	13500783	139986465	139986465_1683	1	1	1	1	6	1	7	1	1	1	1	1	1	1	1	1	1	1	1	1	1	1	4	1	1	1	1	1	1	1	1	6	1	5	1	1	1	1	5
1092	613	4919500	139991196	139991196_ 613	1	1	1	1	1	1	1	1	1	1	1	1	1	1	1	1	1	3	1	1	1	1	2	1	1	1	1	1	1	1	1	3	1	1	1	1	1	3	1
1093	710	5694783	139992691	139992691_ 710	1	2	1	1	1	1	1	2	1	2	1	1	1	1	1	4	1	1	1	1	1	1	1	1	1	1	1	1	1	1	1	4	1	1	1	1	1	2	1
1094	814	6533633	139990494	139990494_ 814	1	5	1	1	4	1	1	1	1	1	1	1	3	1	1	2	3	3	1	1	1	1	2	1	1	1	1	1	1	1	1	4	1	2	1	2	3	4	1
1095	865	6935767	139992126	139992126_ 865	1	3	1	1	1	1	1	1	1	1	1	1	1	1	1	3	1	4	1	1	1	1	3	3	1	1	1	1	1	1	1	3	1	1	1	2	1	5	3
1096	907	7278433	139989090	139989090_ 907	1	1	1	5	1	1	1	1	1	1	1	1	1	1	1	2	1	3	1	1	1	1	4	2	1	1	1	1	1	1	1	5	1	3	1	1	1	1	3
1097	992	7961367	139990097	139990097_ 992	1	3	1	1	1	1	1	1	1	1	1	1	1	1	1	6	1	8	1	1	1	1	4	5	1	1	1	1	1	1	1	2	1	4	1	1	1	1	3
1098	1038	8325133	139993500	139993500_1038	2	4	1	1	1	1	1	1	1	1	1	1	1	1	1	6	1	9	1	1	1	1	1	10	1	1	1	4	1	1	1	7	1	1	1	1	1	4	1
1099	1148	9210050	139987686	139987686_1148	1	1	1	1	1	1	1	1	1	2	1	1	2	1	1	5	1	4	1	1	1	1	2	4	1	1	1	1	1	1	1	6	1	1	1	1	1	1	1
1100	1189	9535316	139985291	139985291_1189	1	1	1	1	1	1	1	1	1	3	1	1	1	1	1	3	1	1	1	1	1	1	1	1	1	1	1	1	1	1	1	1	1	2	1	1	1	1	1
1101	1620	12987217	139989182	139989182_1620	1	16	10	1	28	1	17	1	1	18	31	11	1	1	1	1	1	1	1	1	6	20	14	23	25	1	1	4	10	1	15	15	1	22	1	14	11	1	10
1102	623	4996550	140053177	140053177_ 623	1	1	1	1	1	1	1	1	1	1	1	1	1	1	1	2	3	1	1	1	1	1	4	6	1	1	1	1	5	1	1	1	1	1	1	1	1	1	1
1103	637	5113867	140050186	140050186_ 637	1	1	1	1	1	1	1	1	1	5	8	4	1	1	1	2	3	3	1	1	2	3	5	7	1	1	1	1	3	3	1	1	1	1	2	1	1	1	1
1104	338	2716567	140055893	140055893_ 338	1	4	1	2	1	1	6	5	3	1	3	1	4	1	1	1	1	1	1	1	4	1	3	1	1	1	1	1	1	1	1	1	1	1	1	1	4	1	1
1105	111	892383	140070297	140070297_ 111	1	10	1	1	1	1	1	1	1	5	1	6	15	1	11	6	1	1	1	1	1	1	1	8	1	1	1	1	9	1	1	1	1	9	1	1	1	1	1
1106	1366	10955367	140066635	140066635_1366	3	5	3	3	1	2	4	1	2	2	1	4	4	3	1	3	3	1	3	5	4	1	2	4	1	1	3	1	2	3	1	4	1	3	4	5	6	3	2
1107	470	3770967	140070053	140070053_ 470	1	1	3	3	1	1	3	1	1	1	1	1	1	1	1	1	1	1	2	1	1	1	1	1	1	1	1	1	1	1	1	2	1	1	1	1	1	1	1
1108	1139	9131200	140071625	140071625_1139	3	4	3	1	1	1	1	1	1	1	1	2	2	1	3	1	1	1	1	1	1	1	1	1	1	1	1	1	1	1	1	2	1	1	1	1	1	1	1
1109	1277	10241550	140068726	140068726_1277	14	3	13	3	3	1	6	7	5	5	8	7	8	3	8	3	4	3	9	9	10	1	6	7	3	7	8	1	2	5	4	10	6	3	1	1	6	1	7
1110	1554	12460067	140068207	140068207_1554	13	8	12	1	13	9	1	8	15	11	11	7	1	12	10	6	10	10	8	9	1	12	12	5	14	13	13	10	10	13	5	13	9	14	12	14	10	14	9
1111	108	869300	140078003	140078003_ 108	1	1	10	9	6	1	19	11	11	1	8	1	1	10	1	1	6	1	16	10	10	7	10	1	6	11	8	8	1	8	8	1	13	1	5	5	1	12	12
1112	1349	10814966	140074585	140074585_1349	1	1	2	2	1	1	1	1	1	1	1	2	1	1	2	1	1	4	1	4	1	1	1	1	1	1	1	1	1	1	1	1	1	1	1	1	1	1	4
1113	421	3384317	140104797	140104797_ 421	6	9	9	1	5	1	19	9	10	1	8	4	18	12	1	2	3	1	14	14	17	1	1	1	1	1	4	5	1	1	10	1	10	1	1	1	15	13	12
1114	434	3484350	140104843	140104843_ 434	13	15	15	6	11	5	28	18	18	10	16	8	25	25	16	10	9	9	20	15	21	3	5	11	1	14	13	9	12	7	13	15	14	4	7	4	19	18	18
1115	1208	9691116	140105545	140105545_1208	8	10	14	1	1	1	1	1	1	1	1	1	1	1	1	1	1	1	1	1	1	39	1	1	1	1	1	1	1	1	1	1	1	1	1	1	1	1	1
1116	1395	11188216	140110641	140110641_1395	1	1	1	3	1	1	1	1	4	1	1	1	1	1	1	1	1	1	1	1	1	1	1	1	1	1	1	1	5	1	1	1	1	1	1	1	1	1	1
1117	1136	9108117	140115021	140115021_1136	7	1	6	1	1	1	1	1	1	1	1	3	5	2	4	1	1	1	1	1	1	2	1	1	1	1	1	1	1	1	1	1	1	1	1	1	1	1	1
1118	1271	10195383	140113861	140113861_1271	12	10	9	1	1	1	1	1	4	1	2	7	1	3	2	1	1	1	1	1	1	7	1	1	1	1	1	1	1	1	1	1	1	1	1	1	1	1	1
1119	1296	10397350	140117477	140117477_1296	4	6	1	1	1	1	1	1	1	1	1	1	1	1	1	1	1	1	1	1	1	9	1	1	1	1	1	1	1	1	2	1	1	1	1	1	1	1	1
1120	351	2816600	140124924	140124924_ 351	19	18	19	8	7	1	35	10	19	14	21	8	32	18	16	17	15	20	21	14	30	6	1	27	1	15	8	19	28	1	4	14	11	23	12	14	19	12	18
1121	536	4298017	140142105	140142105_ 536	38	43	40	23	21	17	48	32	29	30	28	18	45	41	29	24	25	20	42	38	44	21	31	30	21	38	31	26	30	22	33	38	34	36	24	28	44	37	36
1122	850	6820333	140984116	140984116_ 850	1	1	1	1	1	1	1	1	1	1	1	1	3	2	1	2	1	1	1	1	1	1	1	1	1	1	1	1	1	1	2	1	1	1	1	1	1	2	2
1123	1654	13268033	140984375	140984375_1654	1	1	1	1	2	1	1	1	1	1	1	1	1	1	1	1	1	1	2	1	1	1	1	1	1	2	1	1	1	1	1	1	1	1	1	1	1	1	1
1124	1579	12662033	140990997	140990997_1579	6	6	1	17	12	14	11	7	10	14	16	17	13	14	15	17	12	1	10	11	14	9	10	13	14	14	1	11	11	11	12	13	8	11	6	7	6	9	9
1125	1582	12685117	140990189	140990189_1582	1	1	1	5	17	14	13	3	1	5	12	1	8	11	1	3	9	1	14	12	5	8	1	7	9	1	1	9	8	8	9	5	8	8	1	1	6	2	6
1126	800	6416217	141008163	141008163_ 800	1	1	1	2	2	1	1	1	1	1	1	1	1	1	1	1	1	1	2	1	1	1	1	1	1	2	1	1	1	1	1	1	1	1	1	1	1	1	1
1127	1580	12669717	141000793	141000793_1580	1	6	5	1	1	1	1	1	1	1	1	1	1	1	1	1	1	1	3	1	1	1	1	2	1	1	3	2	1	7	2	1	1	1	1	1	1	1	1
1128	636	5106167	141050858	141050858_ 636	1	1	2	1	1	2	1	1	1	5	7	1	1	1	1	2	5	2	1	1	1	4	3	1	1	1	1	3	4	3	1	3	1	5	1	4	1	1	1
1129	471	3778650	141057510	141057510_ 471	1	2	1	1	1	1	1	1	1	1	2	1	1	1	1	1	1	1	1	1	1	1	1	1	1	1	1	1	1	1	1	1	1	1	1	1	1	2	1
1130	108	869300	141066360	141066360_ 108	1	1	1	1	1	1	4	1	1	1	1	1	5	1	1	1	1	1	4	1	4	1	1	1	2	1	1	1	1	1	1	1	1	1	1	1	5	1	1
1131	340	2731950	141064194	141064194_ 340	1	3	2	1	1	1	9	1	3	1	1	1	9	5	1	2	1	1	5	4	6	1	1	1	1	1	1	1	3	1	5	4	4	1	1	1	3	1	1
1132	685	5492816	141064362	141064362_ 685	1	3	2	1	1	1	1	1	1	1	1	5	1	1	1	1	1	5	1	1	1	1	2	1	1	1	1	1	1	1	1	1	1	1	1	1	1	1	1
1133	756	6068033	141088226	141088226_ 756	6	2	1	12	19	14	1	1	1	17	17	11	1	1	1	10	8	14	1	1	1	7	8	11	1	1	1	7	8	1	1	1	1	6	3	4	1	1	1
1134	771	6183466	141088303	141088303_ 771	1	1	1	6	5	1	1	1	1	3	1	1	1	1	1	1	2	1	1	1	1	1	1	1	1	1	1	3	3	1	1	1	1	1	1	1	1	1	1
1135	823	6602983	141089813	141089813_ 823	1	3	3	19	16	8	1	1	1	8	13	5	1	1	1	12	3	10	1	1	1	5	9	15	1	1	1	5	1	1	1	1	1	4	6	8	1	1	1
1136	831	6664533	141089279	141089279_ 831	1	1	3	2	8	2	1	1	1	3	5	2	1	1	1	1	1	1	1	1	1	1	1	1	1	1	1	1	1	1	1	1	1	1	4	6	1	1	1
1137	680	5454350	141092926	141092926_ 680	1	1	1	7	7	5	1	1	1	4	1	2	1	1	1	1	1	1	1	1	1	1	1	1	1	1	1	1	1	1	1	1	1	1	1	1	1	1	1
1138	1162	9317866	141093246	141093246_1162	2	4	1	1	1	1	1	1	1	1	2	1	1	1	1	1	1	1	1	1	1	1	1	1	1	1	1	1	1	1	1	1	1	1	1	1	1	1	1
1139	232	1862333	141101761	141101761_ 232	1	1	2	1	1	1	5	1	1	1	1	1	1	3	1	1	1	1	1	1	4	1	1	1	1	1	1	1	1	1	1	1	1	1	1	1	1	1	1
1140	327	2622333	141102341	141102341_ 327	12	9	11	4	1	1	24	12	11	1	8	4	16	16	5	5	1	3	13	11	17	5	3	7	1	8	10	1	9	3	9	15	9	5	4	1	13	14	8
1141	341	2739650	141100677	141100677_ 341	1	1	1	1	1	1	4	1	1	1	1	1	1	1	1	1	1	1	4	1	1	1	1	1	1	1	1	1	1	1	1	1	1	1	1	1	1	4	1
1142	372	2987883	141101303	141101303_ 372	1	1	1	1	1	1	11	1	1	1	4	1	1	2	1	1	1	1	6	1	5	1	1	1	1	1	1	1	1	1	1	5	6	1	1	1	6	7	1
1143	768	6160383	141100769	141100769_ 768	1	1	2	1	1	1	1	1	1	2	1	1	1	1	1	1	1	4	1	1	1	1	1	1	1	1	1	1	1	1	1	1	1	1	1	1	1	1	1
1144	679	5446650	141126541	141126541_ 679	3	1	1	1	1	1	5	1	2	1	3	1	3	1	2	1	1	3	2	1	1	1	1	3	1	2	2	2	2	1	1	1	1	1	1	1	1	1	1
1145	1164	9333350	141126556	141126556_1164	21	18	2	1	1	1	1	1	1	1	1	1	8	1	1	1	1	1	1	1	1	7	1	1	1	1	1	1	1	1	1	1	1	1	1	1	1	1	1
1146	1209	9698816	141126572	141126572_1209	2	1	3	1	1	1	1	1	3	1	1	1	1	1	1	1	1	1	1	1	1	1	1	1	1	1	1	1	1	1	1	1	1	1	1	1	1	1	1
1147	1292	10366567	141132065	141132065_1292	4	1	3	1	1	1	1	1	1	1	1	1	1	1	1	1	1	1	1	1	1	9	1	1	1	1	1	1	1	1	1	1	1	1	1	1	1	1	1
1148	1272	10203067	141127914	141127914_1272	4	6	4	1	1	1	1	1	1	1	1	1	1	1	1	1	1	1	1	1	1	12	1	1	1	1	1	1	1	1	1	1	1	1	1	1	1	1	1
1149	1358	10893817	141129761	141129761_1358	1	1	1	1	1	1	2	1	1	1	1	1	1	1	1	1	1	2	1	2	1	1	1	1	1	1	1	1	2	1	1	1	1	1	1	1	1	1	1
1150	399	3205233	141137833	141137833_ 399	22	23	21	8	9	5	27	19	18	11	14	8	23	1	16	10	10	13	19	15	19	1	11	15	8	10	14	12	16	11	12	1	12	14	6	1	1	14	11
1151	625	5011933	141138214	141138214_ 625	1	1	1	2	5	5	1	1	1	1	1	1	1	1	1	1	1	1	1	1	1	1	1	1	1	1	1	1	1	1	1	1	1	1	1	1	1	1	1
1152	538	4313400	141145477	141145477_ 538	3	5	1	1	1	1	5	1	4	1	1	3	4	1	1	2	1	2	4	4	4	1	1	1	1	3	1	1	1	1	1	4	1	1	1	1	5	1	1
1153	1501	12042633	141142776	141142776_1501	1	1	1	1	1	1	1	8	10	1	1	1	1	1	1	3	4	1	1	1	1	1	1	1	1	1	1	1	1	1	1	2	1	1	1	1	1	1	1
1154	1621	13004500	141963120	141963120_1621	5	1	1	1	1	1	1	18	12	1	5	1	9	1	1	1	1	11	1	1	1	1	1	1	1	3	1	1	1	1	1	9	1	1	1	1	2	1	4
1155	1681	13485383	141960526	141960526_1681	1	1	1	1	1	1	1	1	1	1	1	1	1	1	1	6	1	7	1	1	1	1	1	1	1	1	1	1	1	1	1	1	1	1	1	1	1	5	3
1156	1033	8286650	141972122	141972122_1033	2	1	1	1	1	1	1	1	3	1	1	1	1	1	1	1	1	4	1	1	1	1	1	1	1	1	1	1	1	1	1	1	1	1	1	1	1	1	1
1157	1603	12856300	141982681	141982681_1603	14	9	31	1	1	20	65	12	1	9	5	16	22	1	16	1	10	14	1	24	11	1	24	1	1	10	1	12	13	14	45	1	48	18	26	9	5	14	36
1158	1581	12677417	141983948	141983948_1581	45	32	37	74	72	70	85	65	75	72	62	68	66	72	75	66	62	69	69	69	63	66	72	62	59	57	60	51	51	52	55	55	50	46	48	48	41	51	49
1159	1614	12941033	141979370	141979370_1614	8	4	6	1	3	14	16	1	1	3	6	10	13	10	6	1	1	10	4	1	7	1	11	1	1	6	5	10	8	11	8	1	7	8	10	6	1	1	22
1160	1627	13050667	141980850	141980850_1627	6	1	5	1	1	9	9	1	1	1	1	2	6	1	8	1	1	7	4	1	5	9	3	1	1	4	1	7	4	7	1	1	1	1	4	1	1	1	4
1161	1694	13585517	141979385	141979385_1694	4	1	1	1	1	6	1	1	1	1	1	1	1	1	1	9	1	6	1	1	3	1	1	1	1	1	1	1	1	1	1	1	1	1	1	1	1	1	1
1162	870	6974333	141986115	141986115_ 870	2	2	1	1	1	1	1	1	1	1	1	1	1	1	1	1	1	2	1	1	1	1	2	1	1	1	1	1	1	1	1	4	1	1	2	2	1	1	1
1163	922	7393850	141987961	141987961_ 922	1	1	1	1	1	1	1	1	1	1	1	2	1	1	1	1	1	2	1	1	2	1	1	1	1	1	1	1	1	1	1	1	1	1	1	1	2	1	1
1164	1023	8209700	141988159	141988159_1023	2	1	1	1	2	3	1	3	1	1	1	4	1	1	1	1	1	4	2	1	2	2	1	2	1	1	1	1	1	1	1	1	1	2	1	2	1	1	1
1165	1007	8076900	141988190	141988190_1007	1	1	1	1	1	1	1	1	1	3	1	2	1	1	1	1	1	3	1	1	3	1	1	1	1	1	3	1	1	1	1	1	2	1	1	1	2	1	1
1166	1039	8332817	141989548	141989548_1039	1	1	1	1	1	1	1	1	1	1	1	2	1	1	1	1	1	2	1	1	3	1	1	1	1	1	1	1	1	1	1	1	1	2	1	2	2	1	1
1167	1127	9038850	141988678	141988678_1127	2	1	1	1	2	1	1	2	2	1	1	2	1	1	1	6	1	2	3	1	4	1	2	4	1	1	2	1	1	1	1	1	1	1	1	2	3	1	1
1168	1206	9675734	141988617	141988617_1206	1	1	1	1	1	1	1	1	1	1	1	1	1	1	1	1	1	2	3	1	2	1	1	1	1	1	1	1	1	1	1	1	1	1	1	2	1	1	1
1169	1662	13329583	141995941	141995941_1662	1	1	1	1	1	1	1	1	1	3	4	1	1	1	2	1	1	1	1	1	8	1	1	1	1	1	1	1	1	5	1	1	1	1	1	1	1	1	1
1170	1107	8875366	142000488	142000488_1107	1	1	1	1	1	1	1	1	1	2	1	1	1	1	1	1	1	1	1	1	1	3	1	1	1	1	1	1	2	1	1	1	1	1	1	1	1	1	1
1171	536	4298017	142029709	142029709_ 536	1	1	1	1	1	1	1	1	1	1	1	1	3	1	1	4	2	1	4	1	1	1	1	3	1	1	1	5	1	1	1	5	1	1	1	1	1	1	1
1172	749	6004583	142063675	142063675_ 749	1	3	1	1	1	1	1	1	1	1	1	1	1	1	1	4	1	1	2	1	3	4	4	1	1	1	1	4	5	1	1	3	1	4	1	4	1	5	1
1173	481	3865200	142120834	142120834_ 481	1	2	1	1	1	1	1	1	1	1	5	1	1	1	1	7	1	1	1	1	1	5	3	1	1	1	1	5	8	6	1	1	1	1	3	4	1	1	1
1174	561	4500083	142122696	142122696_ 561	1	2	1	1	1	1	6	1	1	1	1	1	5	4	1	1	1	1	1	1	6	1	1	2	1	1	1	1	1	1	1	2	3	1	1	1	3	1	3
1175	719	5764050	142117279	142117279_ 719	3	1	1	1	1	1	1	1	1	1	1	1	4	1	1	2	1	1	1	1	1	1	1	1	1	1	1	1	1	1	1	1	1	1	1	1	1	1	1
1176	1174	9419900	142120972	142120972_1174	19	17	20	1	1	1	1	1	1	1	1	1	1	1	1	1	1	1	1	1	1	74	1	1	1	1	1	1	1	1	1	1	1	1	1	1	1	1	1
1177	1209	9698816	142121460	142121460_1209	22	26	25	1	1	1	1	1	5	1	1	1	1	1	1	1	1	1	1	1	1	97	1	1	1	1	1	1	1	1	1	2	1	1	1	1	1	1	1
1178	1288	10326183	142121429	142121429_1288	110	1	1	4	1	1	1	4	14	1	1	1	1	1	1	1	1	1	1	1	1	39	1	1	1	1	1	1	13	1	2	1	1	1	1	1	6	1	1
1179	1296	10397350	142121567	142121567_1296	72	108	109	11	3	1	4	9	15	1	1	5	1	1	7	7	3	1	11	1	7	141	4	1	1	1	1	4	21	1	11	1	1	5	1	1	9	1	5
1180	1383	11095866	142123001	142123001_1383	6	8	1	23	1	1	1	11	23	1	1	1	1	1	5	1	1	1	1	1	1	14	1	1	1	1	1	1	27	1	20	1	1	1	1	1	18	1	1
1181	1470	11784800	142121170	142121170_1470	20	9	14	20	13	6	18	11	16	15	15	1	18	5	18	10	9	7	6	15	9	5	5	5	1	12	1	8	7	8	9	6	4	1	8	14	18	8	10
1182	1537	12329250	142121918	142121918_1537	1	1	1	1	1	1	2	1	4	1	1	1	4	1	4	1	1	1	1	1	1	1	1	1	1	1	1	1	1	1	1	1	1	1	1	1	3	1	1
1183	1234	9900884	142126007	142126007_1234	5	6	4	1	1	1	1	1	1	1	1	1	1	1	1	1	1	1	1	1	1	30	1	1	1	1	1	1	1	1	1	1	1	1	1	1	1	1	1
1184	1313	10528250	142131683	142131683_1313	1	1	1	1	1	1	1	1	7	1	1	1	1	1	1	1	1	1	1	1	1	5	1	1	1	1	1	1	6	1	1	1	1	1	1	1	3	1	1
1185	1668	13375750	142973862	142973862_1668	1	1	1	1	1	1	1	1	2	2	1	1	1	1	3	1	1	2	1	1	1	1	1	1	1	1	1	1	1	1	1	1	1	1	1	1	1	1	1
1186	1577	12646633	142980896	142980896_1577	1	15	14	15	12	15	13	11	14	14	14	13	1	18	14	18	12	15	16	13	13	16	11	16	13	10	15	13	11	15	15	1	9	13	10	11	12	14	16
1187	1582	12685117	142981918	142981918_1582	1	1	3	6	4	4	12	4	3	7	1	7	1	2	4	1	5	7	4	1	1	10	1	3	6	1	7	11	8	8	7	1	1	4	4	2	1	1	7
1188	1593	12779350	142979340	142979340_1593	1	1	3	3	2	2	1	7	1	3	1	1	1	2	1	1	2	1	2	1	1	4	1	1	5	1	4	1	1	1	2	1	1	1	2	1	1	1	1
1189	373	2995583	143027252	143027252_ 373	1	1	1	1	1	1	3	2	1	1	1	1	1	1	1	1	1	1	1	1	3	1	1	1	1	1	1	1	1	1	1	1	1	1	1	1	1	1	1
1190	467	3747883	143028595	143028595_ 467	1	1	1	1	1	2	1	1	1	2	3	2	1	1	1	1	1	1	1	1	1	1	1	1	1	1	1	1	1	1	1	1	1	1	1	1	1	1	1
1191	562	4507767	143039841	143039841_ 562	1	1	1	1	2	1	1	1	1	2	2	1	1	1	1	1	1	1	1	1	1	1	1	1	2	1	1	2	1	1	1	1	1	1	1	1	1	1	1
1192	625	5011933	143059174	143059174_ 625	1	1	1	1	1	1	1	1	1	1	1	1	1	1	1	1	1	1	2	1	1	1	1	2	1	1	1	1	1	1	1	1	1	2	2	1	1	1	2
1193	566	4538550	143067612	143067612_ 566	1	1	1	1	1	1	1	1	1	1	2	1	1	1	1	1	1	1	1	1	1	2	1	2	1	1	1	3	2	1	1	1	1	1	1	1	1	1	1
1194	751	6029567	143072845	143072845_ 751	1	4	5	3	1	3	4	1	1	1	1	2	1	1	1	5	7	7	1	1	1	6	1	4	1	3	4	1	3	6	1	3	1	7	9	6	2	5	5
1195	1138	9123500	143106125	143106125_1138	33	33	32	1	1	1	1	1	1	7	8	11	22	23	15	1	1	1	1	1	1	1	1	1	1	1	1	1	1	1	1	1	1	1	1	1	1	1	1
1196	1272	10203067	143107193	143107193_1272	48	51	42	1	1	1	4	1	1	6	21	26	13	10	16	1	1	1	1	1	1	1	1	1	1	1	1	1	1	1	2	1	1	1	1	1	1	2	1
1197	109	877000	143121048	143121048_ 109	5	4	3	1	1	1	1	1	1	1	1	1	1	1	1	1	1	1	1	1	1	1	1	1	1	1	1	1	1	1	1	1	1	1	1	1	1	1	1
1198	346	2778117	143118256	143118256_ 346	8	4	3	1	1	1	8	5	4	4	1	4	10	6	5	1	1	1	7	1	9	1	4	1	1	4	1	1	1	1	4	5	4	4	1	1	1	3	6
1199	346	2778117	143126846	143126846_ 346	8	1	1	1	1	1	1	1	1	1	1	1	1	2	1	1	1	1	1	1	1	1	1	1	1	1	1	1	1	1	1	1	1	2	1	1	1	1	1
1200	1296	10397350	143134232	143134232_1296	9	3	10	1	1	1	1	1	1	1	1	1	1	1	1	1	1	1	1	1	1	18	1	1	1	1	1	1	1	1	1	1	1	1	1	1	1	1	1
1201	1604	12864000	143981995	143981995_1604	3	1	6	17	17	13	19	12	9	6	12	3	15	6	1	11	17	1	13	15	15	1	11	18	17	12	10	9	1	7	12	1	13	8	3	13	16	13	10
1202	1011	8107667	143985825	143985825_1011	1	1	2	1	1	1	1	1	1	1	1	1	1	1	1	1	1	1	1	2	1	1	1	1	1	1	2	1	1	1	1	1	1	1	1	1	1	1	1
1203	1597	12810133	143985199	143985199_1597	8	3	6	17	12	9	4	12	9	16	2	13	15	6	11	8	17	1	2	4	12	2	11	9	11	12	6	3	10	7	1	1	13	8	3	10	10	13	2
1204	1584	12700500	143987320	143987320_1584	12	12	10	17	17	13	19	11	19	15	12	16	20	13	19	11	9	1	13	15	15	10	14	7	16	15	9	9	13	13	12	1	12	14	15	13	16	9	10
1205	952	7634383	143993195	143993195_ 952	1	1	1	1	1	1	1	1	1	1	1	1	1	1	1	1	1	1	1	2	1	1	1	1	1	1	2	1	1	1	1	1	1	1	1	1	1	2	1
1206	1619	12979517	144004288	144004288_1619	2	1	3	3	1	1	1	1	1	1	1	1	1	1	1	1	1	1	1	1	1	1	1	1	1	1	1	2	1	1	1	1	1	1	1	1	2	1	11
1207	95	769267	144050903	144050903_ 95	1	3	1	1	1	1	1	2	1	1	1	1	3	1	1	1	1	1	1	1	1	1	1	1	1	1	1	1	2	1	2	1	1	1	1	1	1	1	1
1208	202	1621700	144047424	144047424_ 202	39	44	43	1	17	10	29	100	20	1	33	13	31	24	14	26	25	23	27	19	31	16	22	23	7	20	20	21	34	15	14	34	11	22	16	16	22	24	18
1209	448	3592083	144045700	144045700_ 448	1	5	1	1	1	1	1	1	1	1	1	1	1	1	1	2	1	1	2	3	1	2	1	1	1	1	1	4	5	2	3	2	1	5	3	4	4	1	2
1210	546	4384567	144045090	144045090_ 546	11	11	14	4	5	4	12	13	9	1	1	1	7	4	5	3	1	3	5	4	5	4	1	1	1	7	3	4	5	6	8	5	6	10	7	10	13	7	8
1211	744	5966100	144044220	144044220_ 744	30	30	35	35	24	21	95	42	41	7	11	6	10	8	8	43	34	51	53	40	52	42	48	69	14	44	30	62	75	44	5	42	5	69	43	61	51	50	52
1212	777	6229633	144048309	144048309_ 777	1	5	1	1	1	1	1	1	3	1	1	1	1	1	1	1	1	1	4	3	1	1	1	1	1	1	1	1	1	1	1	1	1	1	1	1	1	1	1
1213	796	6385450	144044724	144044724_ 796	1	4	3	3	1	1	24	11	12	1	1	1	1	1	1	4	1	1	9	5	8	1	1	1	1	3	3	3	2	1	3	2	1	1	1	1	7	1	11
1214	625	5011933	144054596	144054596_ 625	1	2	1	1	1	1	1	1	1	1	1	1	1	1	1	1	1	1	1	1	3	1	1	3	1	1	1	1	4	1	1	1	1	1	1	1	1	1	2
1215	512	4113333	144066498	144066498_ 512	1	1	1	1	1	1	1	1	1	1	1	1	3	1	4	1	1	1	1	1	3	1	1	1	1	1	1	1	1	1	4	3	4	1	1	1	1	1	1
1216	783	6285400	144064514	144064514_ 783	1	1	1	1	1	1	1	1	1	1	1	1	1	1	1	1	1	1	1	1	2	1	1	1	1	1	1	1	1	1	1	3	1	3	1	1	1	1	1
1217	373	2995583	144074844	144074844_ 373	1	1	1	1	1	1	1	1	1	1	1	1	1	1	1	1	1	1	1	1	3	1	1	3	1	1	1	1	6	1	1	1	1	1	1	1	1	1	1
1218	407	3266900	144077835	144077835_ 407	1	4	2	1	1	1	2	1	1	1	10	1	1	1	2	4	1	1	1	1	3	1	1	12	1	1	1	3	13	4	13	1	1	5	5	1	20	3	1
1219	580	4655967	144079971	144079971_ 580	243	250	237	123	151	85	537	284	294	102	167	90	331	239	239	104	108	114	383	277	431	88	142	152	142	273	232	128	174	91	96	276	262	134	98	109	129	282	330
1220	716	5740950	144078094	144078094_ 716	9	10	12	10	16	7	1	1	1	10	4	1	6	4	5	1	1	1	35	6	30	1	1	1	1	1	1	1	1	1	1	1	1	1	1	1	7	4	1
1221	1351	10839950	144076889	144076889_1351	1	1	1	1	1	1	1	1	1	1	1	1	1	1	1	3	4	2	1	1	1	1	1	1	1	1	1	1	1	1	1	1	1	1	1	1	1	1	1
1222	511	4105650	144082428	144082428_ 511	1	4	5	4	3	1	9	1	1	1	7	2	2	2	1	3	3	3	2	2	6	1	2	6	3	4	3	6	1	3	1	2	1	4	3	1	1	4	4
1223	557	4469300	144081833	144081833_ 557	1	1	1	1	1	1	5	1	1	1	1	2	1	2	1	1	1	1	1	3	6	4	1	5	1	1	1	1	4	3	1	2	1	6	1	1	1	1	4
1224	638	5121567	144080063	144080063_ 638	1	1	1	1	1	1	18	6	7	1	1	1	5	3	5	1	1	2	8	4	15	1	1	1	1	7	4	1	1	2	1	9	4	1	1	1	1	5	1
1225	779	6245017	144080261	144080261_ 779	1	5	4	1	4	1	1	1	1	1	1	1	1	1	1	11	7	8	1	1	3	8	8	6	1	1	1	9	9	8	1	3	3	1	8	9	61	3	1
1226	1272	10203067	144112656	144112656_1272	4	1	5	1	1	1	1	1	1	1	1	2	1	1	1	1	1	1	1	1	1	1	1	1	1	1	1	1	1	1	1	1	1	1	1	1	1	1	1
1227	1291	10358867	144972687	144972687_1291	1	1	1	1	2	1	1	1	1	1	2	1	2	1	1	1	1	1	1	1	1	1	2	1	1	3	1	1	1	1	1	4	1	4	1	1	1	1	1
1228	1336	10714833	144972046	144972046_1336	1	1	1	1	1	1	1	1	1	5	4	8	1	1	1	1	1	1	1	1	4	5	5	2	1	1	1	1	1	1	1	3	1	3	1	1	2	3	2
1229	1388	11134350	144973770	144973770_1388	1	1	1	1	1	1	1	1	1	1	1	1	1	1	1	1	1	1	1	1	1	3	1	6	1	1	1	4	1	11	9	1	1	1	1	1	8	1	1
1230	1190	9543016	144980011	144980011_1190	1	1	1	1	4	4	3	3	3	2	3	2	3	1	3	1	1	1	1	2	1	1	1	2	2	2	1	1	1	1	2	2	1	1	2	1	2	2	1
1231	1428	11451933	144982483	144982483_1428	13	12	8	35	32	27	24	30	20	13	13	15	14	1	21	1	1	1	13	12	12	9	8	11	1	13	14	1	11	9	12	14	1	9	10	1	11	9	1
1232	1492	11963783	144981140	144981140_1492	10	9	8	32	19	20	19	22	18	12	11	11	1	11	17	1	1	1	7	10	12	8	4	6	1	10	9	1	9	3	5	9	1	1	15	1	8	12	1
1233	1130	9061934	144982330	144982330_1130	1	1	1	1	1	2	1	2	1	1	2	1	1	1	1	1	1	1	1	2	1	1	1	1	1	1	1	1	1	1	1	2	1	2	1	1	1	1	1
1234	1241	9954750	144982666	144982666_1241	1	1	2	1	7	9	3	6	3	5	4	4	3	1	4	1	2	1	2	3	5	1	1	2	1	2	5	1	3	1	3	3	1	1	3	1	1	2	2
1235	1318	10566733	144983002	144983002_1318	3	3	3	1	7	7	7	10	7	7	6	4	7	1	7	1	1	1	5	4	4	1	1	3	1	3	3	1	2	1	5	5	1	2	4	1	3	4	5
1236	1332	10684050	144983963	144983963_1332	6	5	2	1	12	11	10	13	9	7	10	6	10	2	9	1	2	1	5	7	5	1	2	4	1	4	6	1	6	3	5	3	1	1	8	2	2	5	4
1237	1349	10814966	144983444	144983444_1349	4	5	5	1	16	14	12	20	11	9	6	11	10	2	11	1	1	1	5	6	8	3	6	4	1	3	7	1	7	4	6	6	3	1	5	1	5	4	6
1238	1367	10963067	144983353	144983353_1367	4	10	3	23	19	20	14	19	17	9	8	6	6	6	10	1	5	1	10	7	8	7	4	7	1	8	9	2	5	4	7	9	4	4	6	1	6	4	4
1239	1374	11017016	144982635	144982635_1374	7	1	5	1	1	1	1	1	1	1	1	1	1	1	12	1	1	1	1	1	1	3	1	2	1	1	8	1	1	1	1	1	1	1	11	1	1	1	1
1240	1459	11700167	144982727	144982727_1459	1	1	1	1	1	1	1	1	1	1	1	1	1	1	1	1	1	1	1	1	1	1	1	3	1	1	1	1	1	1	1	1	1	1	3	1	5	1	1
1241	1498	12009950	144984360	144984360_1498	1	1	4	1	1	24	1	1	1	1	10	1	1	1	1	1	1	1	1	1	11	1	1	6	1	3	8	1	2	1	1	1	1	1	4	1	10	1	1
1242	1534	12306167	144983292	144983292_1534	26	22	16	67	56	69	50	60	54	34	12	49	48	52	58	41	27	47	53	49	49	36	34	39	37	46	49	35	29	35	47	42	35	31	31	27	33	34	25
1243	1513	12134967	144983444	144983444_1513	10	11	6	25	27	54	21	23	40	25	13	6	15	8	17	1	26	1	14	11	18	4	3	3	1	9	38	5	5	8	14	13	13	3	23	12	26	11	3
1244	1627	13050667	144984024	144984024_1627	2	1	2	1	2	3	2	1	4	2	2	1	2	1	2	1	1	1	2	2	2	4	1	2	1	1	2	1	2	1	2	2	1	1	2	1	1	2	1
1245	1627	13050667	144985443	144985443_1627	1	1	1	1	1	4	2	1	2	1	2	1	1	1	2	1	1	1	1	1	2	1	1	1	1	1	2	1	1	1	1	1	1	1	1	1	1	1	1
1246	1343	10768700	145002975	145002975_1343	1	1	1	1	1	1	1	1	1	1	1	2	1	1	2	1	1	1	1	1	6	1	3	1	1	1	1	1	1	1	1	1	1	1	1	1	1	1	1
1247	1546	12398500	145006012	145006012_1546	1	2	1	1	1	1	1	1	1	1	1	1	1	1	2	1	2	1	1	2	1	2	2	1	1	1	1	1	1	1	5	1	1	1	1	1	2	1	1
1248	890	7137917	145023865	145023865_ 890	1	1	1	1	1	1	1	1	1	1	1	1	1	1	1	1	1	1	1	1	1	1	1	1	1	1	1	2	1	1	1	1	2	1	1	1	1	2	1
1249	609	4888717	145030365	145030365_ 609	5	5	2	1	3	1	14	4	4	1	3	2	2	1	3	1	1	1	8	2	1	1	2	4	1	4	1	4	5	3	2	1	6	2	1	3	4	1	3
1250	203	1629400	145045486	145045486_ 203	4	1	2	1	1	1	1	7	1	1	1	1	1	1	1	1	2	1	1	1	3	1	1	1	1	3	1	1	2	1	1	2	1	3	1	1	1	1	1
1251	545	4376867	145051254	145051254_ 545	1	1	2	1	1	1	1	2	1	1	1	1	2	1	1	1	2	1	1	2	1	1	1	1	1	1	1	1	1	1	1	1	1	1	1	2	1	1	1
1252	745	5973800	145048843	145048843_ 745	3	5	2	1	2	1	1	5	4	2	2	1	2	1	1	1	3	2	7	3	6	6	2	8	1	2	3	6	5	4	1	2	1	7	3	4	6	3	1
1253	841	6751083	145048798	145048798_ 841	1	1	1	1	2	1	1	1	1	2	1	3	1	1	1	1	1	1	2	1	2	1	1	1	1	1	1	1	1	1	1	1	1	1	2	1	1	1	1
1254	629	5042717	145066406	145066406_ 629	1	1	1	1	1	1	3	2	1	1	1	1	1	1	1	1	1	2	1	1	5	1	2	3	1	1	1	1	1	1	2	2	1	1	1	2	1	1	2
1255	583	4679050	145083954	145083954_ 583	28	29	29	16	16	10	64	34	36	11	22	6	43	30	28	12	11	15	47	26	46	11	15	19	13	33	24	17	19	9	10	36	28	15	12	13	18	31	39
1256	591	4740617	145086365	145086365_ 591	1	1	1	7	1	6	1	19	1	1	1	1	1	1	1	1	1	1	1	1	1	1	1	1	1	1	1	1	1	1	1	1	1	1	1	1	1	1	1
1257	754	6052650	145082916	145082916_ 754	1	1	1	1	1	1	1	1	1	1	1	1	1	1	1	1	1	1	1	1	1	1	1	1	1	1	1	4	1	1	1	1	1	2	1	1	4	1	1
1258	1044	8371300	145097702	145097702_1044	6	1	1	1	1	1	1	1	3	1	1	1	1	1	1	1	1	1	1	1	1	1	1	2	1	1	1	1	3	1	1	1	1	1	1	1	3	1	1
1259	688	5515900	145101318	145101318_ 688	5	1	1	1	1	1	1	1	1	1	1	1	1	1	1	1	3	4	1	1	2	6	1	6	1	1	1	6	4	3	1	1	1	13	1	7	2	1	2
1260	753	6044950	145104767	145104767_ 753	2	1	1	1	1	1	1	1	1	1	2	1	1	1	1	1	2	1	1	1	1	1	1	1	1	1	1	1	3	1	1	1	1	1	1	1	1	1	1
1261	827	6633767	145101883	145101883_ 827	1	1	1	3	5	1	1	1	1	1	3	1	1	1	1	1	1	2	1	1	1	3	1	7	1	1	1	4	4	1	1	1	1	1	1	8	1	1	1
1262	995	7984467	145103638	145103638_ 995	1	1	1	1	1	1	1	1	1	1	1	1	2	1	1	1	1	1	1	1	1	1	1	1	1	1	1	1	7	4	1	1	1	1	1	1	1	1	1
1263	1017	8153934	145100403	145100403_1017	7	5	1	2	4	5	7	1	6	4	7	5	10	4	5	1	2	5	1	1	1	7	1	6	1	1	2	1	4	6	3	3	1	1	1	1	1	3	1
1264	1023	8209700	145100510	145100510_1023	5	7	6	8	7	4	4	4	5	6	11	8	7	4	6	1	7	5	4	4	8	8	3	5	1	4	4	8	10	6	3	3	1	8	1	7	3	6	7
1265	1105	8859966	145102676	145102676_1105	1	1	1	3	4	3	1	5	1	1	4	1	1	3	1	1	1	1	4	1	1	4	1	3	1	1	1	1	2	1	1	1	1	1	1	1	1	1	1
1266	1325	10630183	145101166	145101166_1325	1	1	1	2	1	1	1	1	11	1	1	1	1	1	1	1	1	1	1	1	1	1	1	1	1	1	1	1	10	1	4	1	1	1	1	1	1	1	1
1267	322	2583850	145132263	145132263_ 322	1	1	1	3	1	1	1	1	1	1	1	1	1	1	1	1	4	5	1	1	5	1	1	9	4	3	1	9	10	4	8	8	3	12	9	4	10	13	1
1268	1533	12298467	145980316	145980316_1533	1	1	1	2	1	1	2	1	1	1	1	1	3	1	2	3	1	1	1	1	1	2	1	1	2	1	1	1	2	1	1	1	1	1	1	1	1	1	1
1269	560	4492383	146052017	146052017_ 560	1	1	1	1	1	1	1	1	1	1	1	15	2	1	1	1	1	1	1	1	1	1	1	1	1	1	1	1	1	1	1	1	1	1	1	2	1	1	7
1270	201	1614000	146058487	146058487_ 201	1	1	1	1	1	1	1	1	1	1	1	1	1	1	1	1	1	2	1	1	1	1	4	5	1	1	1	1	5	1	1	1	1	4	1	1	1	1	1
1271	367	2949317	146059570	146059570_ 367	97	95	84	54	58	35	177	92	101	40	77	44	107	80	64	29	29	27	67	47	94	20	30	45	20	29	30	26	45	33	35	29	39	27	20	37	57	41	60
1272	451	3624750	146059113	146059113_ 451	11	10	11	2	1	1	1	2	1	1	8	2	4	1	5	4	4	8	1	6	11	1	8	13	8	7	9	13	17	8	12	12	16	13	12	13	19	16	24
1273	454	3647833	146058060	146058060_ 454	1	1	1	1	1	1	1	1	1	1	1	1	1	1	1	1	1	2	1	1	1	1	7	7	1	1	1	1	1	5	1	1	1	2	1	1	1	1	1
1274	556	4461600	146059769	146059769_ 556	38	38	37	11	19	7	118	66	50	17	34	3	81	49	50	22	13	15	21	17	22	16	26	30	6	12	10	19	37	20	12	11	7	15	15	23	13	11	1
1275	612	4911800	146061172	146061172_ 612	3	1	5	4	1	1	1	3	1	1	3	1	1	1	1	2	8	2	1	1	4	2	7	11	1	1	2	6	12	5	1	1	1	2	7	6	1	1	1
1276	629	5042717	146061295	146061295_ 629	3	5	4	3	11	6	6	4	3	1	2	3	1	2	1	7	12	1	4	1	6	7	12	17	1	3	1	9	22	6	3	2	1	13	16	12	1	1	6
1277	686	5500517	146060089	146060089_ 686	3	3	1	2	3	2	6	2	1	1	3	1	1	1	1	9	6	1	3	1	3	4	1	14	1	1	1	6	1	3	1	1	1	5	7	4	1	1	1
1278	787	6316184	146063538	146063538_ 787	1	1	1	2	10	5	1	2	1	1	1	1	1	1	1	3	1	1	1	1	1	2	4	1	1	3	1	1	5	1	1	1	1	1	1	3	1	1	1
1279	860	6897284	146059097	146059097_ 860	1	1	1	8	11	4	12	5	5	1	3	1	1	1	1	3	4	3	6	1	9	1	3	1	1	3	1	1	1	1	1	2	1	1	1	3	7	1	5
1280	108	869300	146070908	146070908_ 108	1	1	4	2	1	1	8	4	5	1	8	1	8	3	4	2	1	3	5	4	8	1	5	5	3	5	6	6	5	1	7	1	1	7	4	1	1	6	3
1281	625	5011933	146067001	146067001_ 625	1	1	1	1	1	1	1	1	1	1	1	1	1	1	1	5	1	7	1	1	1	1	1	1	1	1	1	1	1	1	1	1	1	4	1	1	1	1	1
1282	685	5492816	146069016	146069016_ 685	1	1	1	1	1	1	1	3	3	1	1	1	1	1	1	1	1	1	1	1	1	1	1	1	1	1	1	1	13	1	1	1	1	1	1	1	1	1	1
1283	108	869300	146075333	146075333_ 108	1	1	1	1	1	1	1	6	1	1	1	1	1	1	1	1	1	1	1	1	1	1	1	1	1	1	1	1	6	6	1	1	1	1	1	1	1	1	1
1284	450	3607467	146092880	146092880_ 450	3	7	1	1	1	1	9	1	6	1	4	3	9	5	4	3	1	2	8	5	10	4	1	1	1	1	7	1	1	1	1	4	1	1	1	4	1	4	1
1285	718	5756350	146093369	146093369_ 718	1	1	1	1	4	1	1	1	1	1	1	1	1	1	1	1	1	1	8	1	6	1	1	1	1	1	1	1	1	1	1	1	1	1	1	1	1	1	1
1286	1521	12196533	146977692	146977692_1521	5	4	7	20	30	12	17	31	9	14	4	6	1	5	8	1	1	26	20	3	5	13	15	19	4	19	2	1	15	19	1	4	3	15	3	1	10	13	3
1287	1333	10691750	146981903	146981903_1333	2	1	1	1	7	3	9	6	5	2	3	3	1	3	5	1	3	1	2	2	3	1	1	3	1	2	1	2	1	1	3	1	5	2	3	3	3	2	1
1288	1417	11367184	146980835	146980835_1417	7	5	4	15	18	5	13	10	9	4	6	4	7	8	7	4	7	4	3	8	5	2	4	5	1	3	3	5	3	5	6	5	6	3	7	4	6	6	6
1289	1428	11451933	146980728	146980728_1428	3	5	3	1	14	1	10	12	12	4	4	4	1	7	6	1	5	3	3	5	7	2	1	4	1	4	3	1	1	3	4	2	4	4	5	3	5	5	4
1290	1433	11490400	146980316	146980316_1433	5	7	6	17	14	4	9	8	9	4	5	5	1	5	4	5	5	5	2	9	5	2	1	3	1	5	5	5	3	4	5	3	5	5	5	3	4	3	5
1291	1455	11669383	146982803	146982803_1455	3	2	3	1	8	3	7	9	7	4	1	3	1	5	5	1	4	4	3	5	4	1	1	2	1	4	1	1	3	2	1	3	5	5	5	3	4	4	4
1292	1505	12073417	146979492	146979492_1505	5	4	2	1	11	8	12	6	9	4	2	6	1	5	8	3	4	5	7	3	7	1	2	5	2	6	1	2	3	4	3	4	5	3	3	2	5	5	3
1293	1538	12336950	146981445	146981445_1538	10	10	7	32	30	29	27	31	19	14	4	17	21	26	26	16	12	26	22	20	23	13	15	19	19	19	20	17	15	20	15	19	16	15	12	13	11	15	17
1294	1494	11979183	146981537	146981537_1494	5	5	7	20	14	12	17	7	24	10	4	6	1	8	9	9	9	5	20	5	17	3	3	14	4	6	2	3	15	19	5	12	12	5	9	2	10	13	10
1295	1565	12554300	146979126	146979126_1565	1	1	1	1	2	1	2	2	2	2	1	1	1	1	1	1	1	1	1	1	1	2	1	1	1	1	1	1	1	1	1	1	1	1	1	1	1	1	1
1296	1340	10745617	146984024	146984024_1340	1	3	1	1	9	3	7	8	3	2	2	3	1	6	3	1	5	2	2	3	3	2	1	2	2	3	1	4	1	3	3	2	3	6	4	3	3	2	1
1297	388	3111000	147047318	147047318_ 388	1	1	1	1	1	1	6	1	1	1	1	1	7	7	5	1	1	1	6	4	5	1	1	1	1	1	1	1	2	1	1	3	1	1	1	1	1	1	1
1298	741	5943017	147052139	147052139_ 741	1	1	1	1	2	1	1	1	1	1	1	1	1	1	1	1	1	1	1	1	1	1	1	1	5	7	1	1	1	1	6	1	1	1	1	1	8	1	1
1299	386	3095617	147060165	147060165_ 386	5	9	10	6	2	2	20	8	11	6	6	3	12	10	11	1	1	1	19	5	40	3	1	1	1	1	1	1	5	1	6	8	1	4	3	1	4	4	5
1300	466	3740183	147056305	147056305_ 466	8	5	4	1	1	1	8	3	1	1	2	4	1	1	1	16	21	1	5	5	7	16	32	29	1	1	2	45	32	12	1	1	3	40	29	31	1	1	1
1301	109	877000	147066772	147066772_ 109	4	1	1	1	1	1	1	1	2	1	1	1	1	1	1	1	1	2	4	1	1	3	3	3	1	1	1	4	6	3	3	3	3	5	1	1	1	3	1
1302	790	6339267	147066330	147066330_ 790	1	1	1	2	4	2	1	1	1	1	2	1	4	1	1	1	1	1	1	2	1	1	1	1	1	1	1	3	4	1	1	1	1	1	1	1	1	1	1
1303	842	6758783	147066208	147066208_ 842	1	15	23	17	20	13	19	8	1	16	19	1	26	16	22	18	18	17	18	14	1	17	21	23	6	17	13	20	24	17	13	14	8	12	1	16	11	16	10
1304	369	2964800	147068909	147068909_ 369	1	1	1	1	6	1	1	1	1	1	1	1	1	1	9	1	1	1	1	1	1	1	1	1	1	1	2	1	1	1	1	1	2	1	1	1	1	1	1
1305	626	5019633	147077316	147077316_ 626	1	1	1	1	1	1	1	1	1	2	3	1	1	1	1	1	3	1	1	1	1	1	1	5	1	1	1	4	1	1	1	1	1	1	1	1	1	1	1
1306	409	3282283	147090942	147090942_ 409	321	341	335	151	160	137	130	132	110	256	449	248	193	92	90	370	289	231	246	136	425	238	234	546	104	160	149	302	611	327	381	154	109	308	277	241	364	244	178
1307	438	3515133	147087814	147087814_ 438	1	1	1	1	1	1	1	1	1	1	1	1	1	1	1	1	2	1	1	1	1	1	1	2	1	1	1	2	2	1	1	1	1	1	5	1	5	1	1
1308	454	3647833	147090637	147090637_ 454	56	55	59	1	1	1	29	18	31	35	40	19	88	34	51	35	35	35	117	69	133	104	85	114	44	122	89	134	164	98	121	84	87	109	73	110	154	126	107
1309	463	3717100	147089462	147089462_ 463	18	25	24	1	1	1	1	1	9	1	1	1	25	19	16	1	14	1	33	24	46	46	32	44	15	38	28	51	73	42	42	32	26	44	24	45	58	56	1
1310	502	4026800	147090622	147090622_ 502	132	137	141	2	1	5	26	21	28	24	39	26	92	52	62	32	38	58	107	80	162	181	120	188	54	167	103	216	339	175	198	136	110	149	114	135	218	200	109
1311	839	6726100	147086121	147086121_ 839	1	1	1	1	1	1	1	2	1	1	1	1	1	1	1	1	1	1	1	1	1	1	2	1	1	1	1	1	1	2	1	1	1	1	3	1	1	1	1
1312	549	4407650	147091446	147091446_ 549	10	10	12	1	1	1	1	1	1	1	4	1	6	1	1	1	1	3	1	1	7	12	4	10	1	15	5	16	25	9	13	12	11	8	3	8	12	17	5
1313	742	5950716	147099487	147099487_ 742	1	1	1	1	1	1	1	1	1	1	1	2	1	1	1	1	1	4	1	1	1	1	1	1	1	1	1	1	1	2	1	1	1	1	1	1	1	1	1
1314	467	3747883	147102585	147102585_ 467	5	1	3	1	1	1	1	1	1	1	1	1	1	1	1	1	1	1	1	1	1	1	1	1	1	1	1	1	1	2	1	1	1	1	1	2	1	1	1
1315	631	5067700	147114044	147114044_ 631	1	1	1	1	1	1	1	1	1	1	1	1	1	1	1	1	1	1	1	1	1	1	1	1	1	1	1	1	3	1	1	1	1	3	1	2	1	1	1
1316	687	5508217	147116684	147116684_ 687	1	3	4	1	4	1	1	1	1	1	4	1	1	1	1	1	4	3	1	1	2	6	6	8	1	1	1	10	9	6	1	1	2	13	10	7	1	1	3
1317	725	5819800	147115448	147115448_ 725	1	1	2	2	1	1	1	1	1	4	4	1	1	1	1	3	3	4	1	1	1	1	1	3	1	1	1	5	1	2	1	1	1	4	1	3	1	1	1
1318	755	6060350	147115784	147115784_ 755	1	1	3	1	1	1	1	1	1	1	1	1	1	1	1	1	1	2	1	1	1	1	1	1	1	1	1	2	1	2	1	1	1	1	1	3	1	1	1
1319	758	6083433	147115341	147115341_ 758	1	1	3	10	10	1	1	1	1	7	15	5	1	1	1	4	7	3	1	1	1	1	3	8	1	1	1	6	1	3	1	2	2	4	1	3	1	1	1
1320	823	6602983	147114410	147114410_ 823	1	1	1	6	1	1	1	1	1	1	1	1	1	1	1	1	1	4	1	1	1	1	1	3	1	1	1	4	1	4	1	1	1	1	1	2	1	1	1
1321	828	6641450	147115311	147115311_ 828	1	1	2	4	1	2	3	1	1	1	1	1	1	1	2	3	1	4	1	1	4	4	3	5	1	1	1	7	3	5	1	2	1	7	1	7	1	1	3
1322	879	7053184	147115250	147115250_ 879	1	1	1	1	1	1	1	1	1	1	1	1	2	1	1	1	1	5	1	1	1	2	2	1	1	1	1	1	1	2	1	1	1	1	1	1	1	2	1
1323	922	7393850	147113373	147113373_ 922	1	4	3	3	1	1	2	1	1	1	1	1	4	2	3	3	1	3	3	1	1	3	2	4	1	1	1	5	1	2	1	1	1	9	1	5	1	3	6
1324	1043	8363600	147115036	147115036_1043	1	9	11	1	1	1	1	1	1	1	1	1	1	1	1	1	1	1	1	1	1	5	1	1	1	1	1	1	1	1	1	1	1	1	1	1	1	1	1
1325	1117	8961900	147114471	147114471_1117	5	2	1	1	1	1	1	1	1	1	1	1	1	1	1	1	1	1	1	1	1	9	1	1	1	1	1	1	1	1	1	1	1	1	1	1	1	1	1
1326	1163	9325650	147115250	147115250_1163	33	39	40	1	1	1	1	1	1	1	1	1	1	1	1	1	1	1	1	1	1	6	1	1	1	1	1	1	1	1	1	1	1	1	1	1	1	1	1
1327	1208	9691116	147117050	147117050_1208	30	29	27	1	1	1	1	3	5	1	1	4	13	10	7	2	1	1	1	1	1	89	1	1	1	1	1	1	4	2	1	1	1	1	1	1	1	1	2
1328	1225	9822033	147116806	147116806_1225	1	2	1	1	1	1	1	1	1	1	1	1	2	1	1	1	1	1	1	1	1	32	1	1	1	1	1	1	4	1	1	1	1	1	1	1	1	1	1
1329	1324	10622500	147117569	147117569_1324	1	1	1	8	1	1	1	1	44	1	1	1	1	1	2	2	1	1	1	1	1	6	1	1	1	1	1	1	35	1	5	1	1	1	1	1	6	1	1
1330	1333	10691750	147113541	147113541_1333	1	1	1	6	1	1	1	1	25	1	1	1	1	1	1	1	1	1	1	1	1	2	1	1	1	1	1	1	26	1	7	1	1	1	1	1	1	1	1
1331	1393	11172816	147114883	147114883_1393	1	1	1	10	1	1	1	4	9	1	1	1	2	1	4	1	1	1	1	1	1	1	1	1	1	1	1	1	16	1	11	1	1	1	1	1	1	1	1
1332	563	4515467	147121628	147121628_ 563	1	1	1	1	1	1	1	1	1	1	1	1	1	1	1	1	1	1	1	1	1	3	1	1	1	1	1	4	4	1	1	1	1	1	1	1	1	1	1
1333	410	3289983	147433701	147433701_ 410	1	1	1	1	1	1	1	1	1	1	28	1	1	1	1	1	1	1	1	1	26	1	1	46	1	1	1	1	56	1	1	1	1	1	1	1	1	1	1
1334	1267	10164600	147517288	147517288_1267	1	1	1	1	1	1	7	1	1	1	1	1	2	1	4	1	1	1	1	1	1	1	1	1	1	1	1	2	1	1	1	1	1	1	1	1	1	1	1
1335	1265	10149200	147613083	147613083_1265	1	1	1	1	1	1	1	1	1	1	3	1	4	1	3	1	1	1	1	1	1	1	1	1	1	1	1	1	1	1	1	1	1	1	1	1	1	1	1
1336	1440	11544267	147932297	147932297_1440	1	1	1	3	1	1	1	2	1	4	1	3	3	2	3	2	3	1	1	1	1	1	1	1	1	1	1	1	1	1	1	1	1	1	1	1	1	1	1
1337	1474	11825183	147934372	147934372_1474	1	1	1	1	1	2	1	1	1	2	1	1	2	3	2	2	2	2	1	1	1	1	1	1	1	1	1	1	1	1	1	1	1	1	1	1	1	1	1
1338	1532	12290767	147932846	147932846_1532	1	1	1	3	1	1	1	1	1	1	1	1	3	1	1	2	1	1	1	1	1	1	1	1	1	1	1	1	1	1	1	1	1	1	1	1	1	1	1
1339	395	3174467	148038010	148038010_ 395	1	1	5	1	1	1	1	1	1	1	4	1	1	1	1	10	5	7	1	1	1	7	8	11	1	3	1	9	7	6	2	4	1	1	1	1	1	1	1
1340	449	3599767	148038147	148038147_ 449	1	1	1	1	2	1	4	1	1	1	2	1	1	1	1	1	1	2	1	2	1	1	1	1	1	1	1	5	1	1	6	4	5	1	1	1	12	10	6
1341	523	4197983	148034042	148034042_ 523	1	1	1	8	17	10	1	1	1	1	1	1	1	1	1	1	1	1	1	1	1	1	1	1	1	1	1	1	1	1	1	1	1	1	1	1	1	1	1
1342	717	5748650	148036331	148036331_ 717	1	1	1	1	1	1	1	1	1	1	1	1	1	1	1	1	1	1	5	2	5	1	1	1	1	3	1	1	1	1	3	1	1	1	1	1	1	1	1
1343	111	892383	148053375	148053375_ 111	1	1	1	1	1	1	1	1	1	1	1	1	1	1	1	1	1	1	1	1	1	1	5	5	1	1	1	6	1	1	1	1	1	4	1	1	1	1	1
1344	162	1304300	148056961	148056961_ 162	1	1	1	1	1	1	1	1	1	1	1	1	1	1	1	4	1	1	1	1	1	1	1	3	1	1	1	4	4	1	1	1	1	1	1	1	1	1	1
1345	367	2949317	148056458	148056458_ 367	1	1	1	1	1	1	1	1	1	1	1	1	1	1	1	1	1	1	1	1	1	1	1	1	1	3	1	5	11	6	1	1	1	1	1	1	1	1	1
1346	426	3422783	148072678	148072678_ 426	1	1	1	1	1	1	1	1	1	1	1	1	3	1	1	1	1	7	1	1	1	1	1	3	1	1	1	1	1	1	1	1	1	1	9	13	1	1	1
1347	458	3678617	148066223	148066223_ 458	10	11	2	2	1	1	16	7	7	8	2	5	10	1	1	11	4	1	1	1	1	1	1	11	1	1	1	1	5	1	1	2	1	2	1	1	1	1	3
1348	109	877000	148068466	148068466_ 109	1	1	1	1	1	1	1	1	1	1	1	1	1	1	1	1	1	2	1	1	1	1	1	1	1	1	1	1	5	1	1	1	2	1	1	1	2	1	1
1349	564	4523167	148075577	148075577_ 564	4	8	7	9	11	8	7	4	1	5	16	6	1	1	3	4	1	1	3	1	1	1	2	5	1	3	1	5	6	1	1	2	1	4	5	3	4	1	1
1350	638	5121567	148070465	148070465_ 638	1	1	1	1	1	1	1	1	1	1	1	1	1	1	1	1	1	2	4	1	1	1	1	1	1	1	1	1	6	1	1	1	1	1	1	3	1	1	1
1351	778	6237333	148071152	148071152_ 778	1	1	1	1	1	1	1	1	1	1	1	1	1	1	1	1	4	1	1	1	1	4	4	10	1	1	1	4	1	7	1	1	1	5	2	6	3	1	1
1352	408	3274583	148094315	148094315_ 408	34	39	39	18	20	16	12	14	15	33	52	26	20	9	9	39	33	21	29	12	52	27	22	67	12	16	18	35	70	34	43	14	8	33	29	30	41	24	22
1353	453	3640150	148093140	148093140_ 453	7	1	4	1	1	1	1	1	1	1	1	1	9	1	1	1	1	1	4	1	14	13	10	12	5	12	10	4	19	13	12	13	10	10	6	10	12	19	12
1354	462	3709400	148091690	148091690_ 462	1	1	1	1	1	1	1	1	1	1	1	1	3	1	1	1	1	1	1	1	1	1	1	1	1	4	1	1	8	1	1	4	1	5	1	4	6	6	1
1355	501	4019100	148094116	148094116_ 501	11	16	17	1	1	1	1	1	1	1	5	1	9	5	5	5	1	8	12	9	16	19	14	26	4	18	14	14	39	21	21	14	10	13	8	21	23	22	11
1356	550	4415433	148091934	148091934_ 550	1	4	1	1	1	1	1	1	1	1	1	1	1	1	1	1	1	1	1	1	4	1	1	1	1	1	1	1	3	1	1	1	2	2	1	2	1	5	1
1357	1552	12444667	148096466	148096466_1552	1	1	1	3	1	1	3	1	1	1	1	1	1	1	1	2	2	2	1	1	1	1	1	3	1	1	2	1	1	2	1	2	1	1	3	1	1	1	1
1358	1164	9333350	148122803	148122803_1164	4	5	3	1	1	1	1	1	1	1	1	1	1	1	1	1	1	1	1	1	1	8	1	1	1	1	1	1	1	1	1	1	1	1	1	1	1	1	1
1359	1607	12887083	148976532	148976532_1607	1	2	1	2	1	1	1	1	2	1	1	1	1	1	1	1	1	1	1	1	1	1	1	1	1	1	1	1	1	1	1	1	1	1	1	1	1	2	1
1360	731	5865983	149011093	149011093_ 731	1	1	1	1	1	1	2	1	1	1	1	1	1	1	1	1	1	2	1	1	1	1	4	1	2	1	1	1	1	1	1	1	1	1	1	5	1	1	1
1361	1062	8519400	149017990	149017990_1062	1	1	2	1	2	1	1	1	1	3	1	2	1	1	1	1	1	1	2	1	2	1	1	1	2	1	1	1	1	1	1	1	1	1	1	1	2	1	1
1362	1184	9496850	149019379	149019379_1184	3	7	9	1	1	1	1	3	1	8	1	4	1	1	5	1	10	1	7	1	1	7	4	1	1	15	1	1	6	1	1	1	2	1	2	1	1	9	2
1363	769	6168067	149022400	149022400_ 769	14	9	5	1	12	11	7	4	5	6	8	5	4	5	4	1	5	1	5	6	5	9	7	5	1	3	5	9	7	5	8	1	8	5	6	1	8	8	5
1364	828	6641450	149022797	149022797_ 828	1	2	1	1	2	1	3	3	2	1	2	2	2	1	2	1	1	1	1	2	2	1	1	2	2	1	1	2	2	1	1	1	1	1	1	2	3	1	1
1365	849	6812650	149022888	149022888_ 849	30	32	29	15	26	15	37	24	22	26	28	20	29	35	24	24	31	25	32	20	31	24	25	37	11	1	20	26	31	25	2	21	11	30	15	17	26	19	15
1366	969	7774800	149024246	149024246_ 969	1	1	2	1	1	1	2	1	1	2	5	1	1	1	1	1	1	1	1	1	1	1	1	1	1	1	1	1	1	1	1	1	2	1	1	1	1	1	2
1367	962	7720933	149022888	149022888_ 962	1	3	6	1	5	3	8	5	1	6	5	4	5	6	3	1	5	1	6	5	6	6	4	4	5	1	6	4	2	6	1	1	2	2	6	3	11	4	4
1368	1113	8931133	149022934	149022934_1113	136	123	120	149	166	146	165	160	160	146	152	129	158	144	147	149	139	157	152	143	128	128	128	133	115	138	129	132	139	130	119	125	110	144	124	133	144	142	136
1369	1161	9310166	149023239	149023239_1161	23	23	21	25	25	28	28	23	27	26	29	25	30	27	27	26	30	25	28	30	26	31	25	21	30	28	25	24	23	25	25	25	24	28	26	30	24	33	32
1370	1231	9877800	149023712	149023712_1231	28	20	25	1	9	13	22	1	6	18	74	8	12	3	8	1	9	1	13	4	4	7	5	5	10	9	7	6	4	8	7	1	2	7	9	10	1	9	13
1371	1275	10226150	149024704	149024704_1275	1	1	1	1	6	7	1	1	1	1	1	5	1	1	3	1	1	1	1	1	1	1	1	1	7	7	1	1	1	1	1	1	1	1	1	1	1	1	1
1372	1296	10397350	149024307	149024307_1296	1	1	7	1	8	5	9	1	1	5	8	6	11	1	5	1	9	1	5	8	7	9	5	6	5	11	1	1	1	1	1	1	1	1	1	1	1	1	7
1373	1306	10474300	149025696	149025696_1306	1	1	1	1	7	5	1	1	1	3	1	1	4	1	3	1	1	1	1	1	1	5	1	1	7	3	1	1	1	1	1	1	1	1	1	1	1	1	5
1374	1316	10551333	149021378	149021378_1316	1	1	4	1	7	5	1	1	1	6	1	8	8	1	5	1	5	1	1	1	1	3	1	1	4	5	1	1	1	1	1	1	1	1	1	1	1	1	5
1375	1370	10986150	149024246	149024246_1370	2	1	5	1	7	4	1	2	4	8	3	5	9	1	4	1	5	1	2	2	1	5	3	4	9	9	1	1	4	1	3	1	1	1	1	1	2	1	7
1376	1393	11172816	149023453	149023453_1393	1	1	1	1	5	1	1	1	1	1	1	1	6	1	1	1	1	1	1	1	1	1	1	1	6	1	1	1	1	1	1	1	1	1	1	1	1	1	6
1377	1424	11421150	149023026	149023026_1424	159	161	157	127	141	92	205	130	140	167	144	168	168	86	151	96	104	124	131	112	134	103	114	88	77	15	88	110	142	122	122	95	105	123	105	139	284	107	153
1378	1454	11661683	149023819	149023819_1454	10	5	7	7	14	10	9	8	17	12	12	11	9	13	12	1	7	1	9	7	7	10	6	3	10	7	10	9	6	9	6	1	5	5	6	8	8	5	10
1379	1510	12111883	149022873	149022873_1510	6	3	7	1	11	2	9	9	11	11	8	10	4	7	8	1	11	1	10	6	5	8	1	1	10	2	9	6	3	4	3	1	6	4	2	10	6	3	11
1380	1470	11784800	149021088	149021088_1470	1	3	5	1	8	5	10	4	10	5	9	10	1	9	6	1	3	1	5	4	8	3	2	1	5	3	6	4	1	5	5	1	5	3	1	9	7	3	10
1381	1485	11909833	149024063	149024063_1485	12	7	7	1	8	7	7	7	6	7	9	14	8	9	16	1	8	1	8	5	9	6	5	5	6	5	4	7	1	4	4	1	7	3	5	7	5	7	7
1382	1521	12196533	149023300	149023300_1521	4	4	3	1	5	4	8	4	5	8	6	6	5	4	6	1	2	1	6	5	5	3	5	3	3	6	4	4	4	2	4	1	3	5	3	6	5	5	10
1383	1542	12367717	149022430	149022430_1542	3	4	1	1	1	3	6	6	3	3	4	9	7	6	2	1	3	1	5	1	3	2	2	2	2	2	2	1	2	2	7	1	1	3	1	4	4	2	5
1384	110	884700	149030960	149030960_ 110	1	2	1	1	1	1	1	1	1	1	1	1	2	1	1	1	1	1	1	1	1	1	1	1	1	1	1	1	2	1	1	1	1	1	1	1	1	1	1
1385	1350	10822650	149026627	149026627_1350	1	1	1	1	7	4	1	1	1	1	1	1	6	1	7	1	5	1	1	1	1	4	1	1	1	1	1	1	1	1	1	1	1	1	1	1	1	1	5
1386	1368	10970767	149029831	149029831_1368	1	3	1	1	4	4	1	2	1	5	4	5	8	1	4	1	3	1	2	2	1	5	2	4	5	9	3	1	1	1	1	1	1	4	1	1	1	1	7
1387	1030	8263567	149037125	149037125_1030	1	1	1	1	1	1	1	1	2	1	1	1	1	1	2	1	1	1	1	1	1	1	1	1	1	1	1	1	1	1	1	1	1	1	2	1	1	1	1
1388	1158	9287084	149036346	149036346_1158	1	1	1	1	1	1	1	1	1	1	1	1	1	1	1	1	7	1	2	1	1	1	1	1	1	1	1	1	1	1	1	1	1	1	6	1	1	1	1
1389	1442	11569250	149036880	149036880_1442	1	1	1	1	1	1	1	1	1	1	1	1	1	1	1	1	4	1	2	1	1	1	2	1	1	1	1	1	14	1	1	1	1	7	1	1	1	1	1
1390	520	4174900	149055847	149055847_ 520	1	1	1	1	1	1	2	1	1	1	1	1	1	1	1	1	1	1	1	1	1	1	1	1	1	1	1	1	1	1	2	1	1	1	1	1	2	1	1
1391	467	3747883	149062729	149062729_ 467	1	2	2	1	1	1	1	1	1	1	1	1	3	1	1	1	1	1	1	1	1	1	1	1	1	1	1	1	1	1	1	1	1	1	1	1	1	1	1
1392	777	6229633	149061020	149061020_ 777	1	1	2	1	1	1	1	1	1	1	4	1	1	1	1	7	7	13	1	1	1	8	8	10	1	1	1	9	12	12	1	1	1	10	4	9	1	1	1
1393	108	869300	149071320	149071320_ 108	11	11	12	10	5	3	20	17	12	7	12	9	21	11	10	7	5	9	14	7	13	4	10	13	4	9	7	19	15	9	10	9	2	17	14	10	7	9	4
1394	115	923167	149070007	149070007_ 115	1	5	1	1	1	1	1	1	1	1	1	1	1	1	1	1	1	1	1	1	1	1	1	7	1	1	1	5	1	1	1	2	1	1	4	1	1	1	2
1395	161	1296617	149071457	149071457_ 161	1	5	1	1	1	3	1	1	1	1	1	1	1	1	1	4	1	5	1	1	1	10	8	13	2	4	1	17	19	1	1	7	1	11	10	7	1	1	3
1396	678	5438950	149096786	149096786_ 678	2	1	1	1	1	1	1	1	1	1	1	1	1	1	1	1	1	2	1	1	1	1	2	3	1	1	1	3	1	1	1	1	1	3	1	3	1	1	1
1397	758	6083433	149094940	149094940_ 758	1	1	1	3	3	1	1	1	1	1	3	1	1	1	1	1	1	2	1	1	1	1	1	2	1	1	1	1	1	1	1	1	1	1	1	1	1	1	1
1398	896	7184083	149097031	149097031_ 896	6	4	5	1	1	1	1	1	1	1	1	1	1	1	1	1	1	1	1	1	1	1	1	1	1	1	1	1	1	1	1	1	1	1	1	1	1	1	2
1399	1044	8371300	149096924	149096924_1044	6	6	5	1	1	1	1	1	1	1	1	4	1	1	1	1	1	8	1	1	1	1	1	8	1	1	1	1	5	4	1	1	1	1	1	7	1	1	1
1400	1213	9729600	149096985	149096985_1213	6	10	7	20	13	18	4	1	6	1	3	4	5	1	8	11	1	1	4	7	16	1	14	2	1	13	5	15	4	12	10	3	2	1	5	14	14	6	19
1401	331	2662700	149104431	149104431_ 331	2	1	1	1	1	1	1	1	1	1	1	1	1	2	1	1	1	1	1	1	1	1	1	1	1	1	1	1	1	1	1	2	1	1	1	1	1	1	3
1402	456	3663233	149106750	149106750_ 456	1	4	1	1	1	1	1	1	1	1	1	1	1	1	1	1	1	1	1	1	1	1	1	1	1	1	1	1	1	1	1	4	1	1	1	1	1	3	1
1403	1182	9481450	149115372	149115372_1182	1	1	1	1	1	1	1	1	1	1	1	1	1	1	1	1	1	1	1	1	2	1	1	1	1	1	1	1	1	1	1	4	1	1	1	1	1	1	2
1404	1237	9923966	149127838	149127838_1237	1	11	1	3	2	1	1	1	1	1	1	1	1	1	1	1	1	2	1	2	2	45	2	1	1	1	1	1	1	1	3	3	1	1	1	1	4	1	1
1405	757	6075733	149131973	149131973_ 757	1	1	1	2	1	1	1	1	1	1	2	2	1	1	1	1	2	3	1	1	1	5	5	7	1	1	1	9	5	3	1	1	1	7	4	6	1	1	1
1406	814	6533633	149131989	149131989_ 814	1	1	1	1	1	1	1	1	1	1	1	1	1	1	1	1	1	2	1	1	1	2	1	1	1	1	1	4	4	1	1	1	1	1	1	1	1	1	1
1407	812	6518233	149131531	149131531_ 812	4	1	4	9	18	1	1	1	1	6	9	7	3	1	1	1	3	6	1	1	1	5	7	8	1	1	1	6	6	1	1	1	1	2	1	5	1	1	1
1408	826	6626067	149132019	149132019_ 826	1	1	1	3	7	1	1	2	1	1	1	3	1	1	1	1	3	4	1	1	1	5	1	7	1	1	1	4	8	1	1	1	1	2	1	1	1	1	1
1409	925	7416934	149132111	149132111_ 925	2	1	1	1	2	1	2	1	1	1	1	1	1	1	1	1	1	2	1	1	1	3	1	1	1	1	1	1	3	1	1	2	1	4	1	1	1	1	1
1410	1058	8488617	149133728	149133728_1058	2	6	3	1	2	1	1	1	1	1	1	1	1	1	1	1	5	3	1	1	1	8	1	6	1	1	1	1	2	1	1	1	1	1	1	1	1	1	1
1411	1137	9115800	149132950	149132950_1137	96	106	112	3	6	1	4	1	1	27	22	41	67	68	49	1	4	3	1	1	1	98	1	1	1	2	1	1	4	1	1	2	1	3	1	1	2	1	1
1412	1174	9419900	149131836	149131836_1174	22	3	26	1	1	1	1	1	1	1	1	1	1	1	1	1	1	1	1	1	1	15	1	1	1	1	1	1	1	1	1	1	1	1	1	1	1	1	1
1413	1272	10203067	149131882	149131882_1272	171	152	158	8	6	1	1	1	18	12	20	16	23	1	20	1	1	3	1	1	2	45	1	1	1	1	1	11	35	2	3	3	1	1	1	1	7	1	1
1414	1289	10333883	149133072	149133072_1289	151	164	154	24	18	9	21	20	28	41	80	110	62	41	56	16	11	14	17	2	20	188	16	1	3	12	7	17	36	8	25	10	5	14	12	10	15	13	17
1415	1337	10722533	149134918	149134918_1337	4	1	1	7	4	1	1	3	36	1	1	2	3	1	1	1	1	3	1	4	2	1	1	1	4	1	1	1	23	1	3	2	3	2	1	1	7	1	4
1416	1379	11055500	149132721	149132721_1379	13	9	14	26	2	1	1	14	32	1	1	3	3	1	7	1	1	2	1	1	1	18	1	1	1	1	1	1	34	1	31	2	1	4	1	1	24	1	2
1417	1387	11126650	149133072	149133072_1387	8	1	1	12	2	1	1	10	21	1	1	1	4	1	5	1	1	2	1	1	1	1	1	1	1	1	1	1	23	1	23	2	1	3	1	1	18	1	1
1418	1472	11809783	149132111	149132111_1472	18	15	19	11	16	7	23	21	20	15	16	26	16	7	24	1	1	11	8	18	14	13	7	6	5	20	1	6	12	12	15	9	5	7	6	13	16	9	22
1419	1460	11707850	149130966	149130966_1460	15	1	12	19	1	1	4	14	7	1	1	1	1	1	15	1	1	2	1	1	1	1	1	1	1	2	1	1	11	1	11	1	1	1	1	1	12	1	1
1420	1265	10149200	149654556	149654556_1265	1	1	1	1	3	1	5	1	1	1	1	1	1	1	6	1	1	1	1	1	1	1	1	1	1	1	1	1	1	1	1	1	1	1	1	1	1	1	1
1421	1266	10156900	149753052	149753052_1266	1	1	1	1	3	4	1	1	1	1	1	1	1	1	1	1	1	1	2	1	1	1	1	1	1	1	1	1	1	1	1	1	1	1	1	1	1	1	1
1422	1264	10141517	149784348	149784348_1264	1	1	1	1	1	1	4	1	1	1	1	1	1	1	4	1	1	1	1	1	1	2	1	1	1	1	1	1	1	1	1	1	1	1	1	1	1	1	1
1423	1265	10149200	149873383	149873383_1265	1	1	1	1	4	1	1	1	1	1	3	1	7	1	1	1	1	1	3	1	1	1	1	1	1	1	1	1	1	1	1	1	1	1	1	1	1	1	1
1424	1267	10164600	149898438	149898438_1267	1	1	1	1	1	3	5	2	1	1	1	3	1	1	1	1	1	1	1	1	1	1	1	1	1	1	1	1	1	1	1	1	1	1	1	1	1	1	1
1425	1415	11351800	149934448	149934448_1415	1	1	1	1	1	1	1	1	1	1	1	1	2	3	4	1	1	1	1	1	1	1	1	1	1	1	1	1	1	1	1	1	1	1	1	1	1	1	1
1426	1458	11692467	149935104	149935104_1458	1	1	1	2	2	2	1	2	1	3	3	1	5	6	5	1	1	1	4	1	1	1	1	1	1	1	1	1	1	1	1	1	1	1	1	1	1	1	1
1427	1618	12971817	149937088	149937088_1618	1	1	2	1	4	1	1	2	2	2	1	1	1	2	2	1	1	1	1	1	1	1	1	1	2	1	1	1	1	1	1	1	1	1	1	1	2	1	1
1428	1476	11840567	149943039	149943039_1476	1	1	1	1	1	2	1	2	1	2	2	1	1	4	2	1	1	1	1	1	1	1	1	1	1	1	1	1	1	1	1	1	1	1	1	1	1	1	1
1429	1603	12856300	149998398	149998398_1603	1	1	1	1	1	2	1	1	1	1	1	1	1	2	1	1	1	1	2	1	1	1	1	1	1	1	1	1	1	1	1	1	1	1	1	1	1	1	1
1430	563	4515467	150016724	150016724_ 563	1	1	1	1	1	1	1	1	1	1	1	1	1	1	1	1	1	1	1	1	1	2	1	2	1	1	1	1	2	1	1	1	1	1	2	1	1	1	1
1431	846	6789567	150027298	150027298_ 846	3	2	2	1	1	1	2	1	2	1	2	1	1	1	2	1	2	2	1	4	1	1	2	3	1	2	1	1	1	1	1	1	1	3	2	1	2	1	1
1432	1113	8931133	150025818	150025818_1113	12	10	10	13	15	12	14	15	11	10	13	15	16	10	10	15	12	13	11	12	10	12	9	15	8	11	8	11	12	10	9	11	1	9	10	11	12	12	10
1433	1161	9310166	150025589	150025589_1161	2	1	3	2	2	1	2	2	1	3	1	4	3	2	2	2	3	3	1	2	1	1	1	1	2	1	1	2	1	1	2	5	1	1	2	2	1	2	1
1434	1230	9860500	150026169	150026169_1230	1	1	2	2	1	1	4	1	1	1	5	1	1	1	1	1	1	1	1	1	1	2	1	2	1	1	1	1	1	1	1	2	1	1	1	1	1	1	1
1435	1424	11421150	150027679	150027679_1424	15	15	15	12	12	9	17	10	13	13	13	14	16	5	12	7	1	9	14	10	13	10	9	6	5	8	7	10	12	12	11	1	8	10	10	15	23	10	12
1436	548	4399950	150036194	150036194_ 548	2	3	3	5	6	3	1	1	1	1	10	3	1	1	1	1	6	5	1	1	1	4	11	7	1	1	1	4	17	4	1	1	1	6	8	4	1	1	1
1437	1502	12050333	150043793	150043793_1502	1	1	2	4	1	1	1	9	1	1	1	1	1	1	1	1	1	1	1	1	1	1	1	1	1	1	1	1	1	1	1	1	1	1	1	1	1	1	1
1438	180	1442817	150058075	150058075_ 180	1	4	2	1	1	1	1	1	1	1	1	1	1	1	1	1	1	1	3	1	1	1	1	1	1	1	3	1	1	1	1	1	1	1	1	1	1	1	1
1439	635	5098484	150054688	150054688_ 635	14	9	14	3	4	2	21	14	16	1	8	1	15	1	11	9	9	8	14	10	19	1	7	13	1	12	8	2	12	1	6	1	6	6	3	4	12	1	5
1440	1409	11295950	150053268	150053268_1409	2	1	1	2	1	3	1	1	1	1	1	1	1	1	1	1	1	1	1	1	1	1	1	1	1	1	1	1	1	1	1	1	1	1	1	1	1	1	1
1441	108	869300	150068314	150068314_ 108	10	10	15	1	1	1	1	8	4	4	6	1	8	5	1	1	1	1	7	6	5	11	12	12	1	1	12	13	14	4	1	12	15	1	13	1	14	11	20
1442	138	1110033	150076736	150076736_ 138	9	2	7	1	1	1	4	1	1	1	1	1	4	1	1	1	1	1	1	1	1	1	6	1	1	1	5	7	7	1	1	1	1	1	7	9	8	1	13
1443	376	3018667	150077179	150077179_ 376	90	97	98	41	38	27	19	6	12	125	168	111	32	23	25	177	149	169	50	29	103	156	196	284	36	46	89	243	235	219	65	64	87	238	165	288	78	59	111
1444	497	3988317	150076630	150076630_ 497	445	484	452	294	273	197	591	349	370	307	428	260	378	282	304	448	360	424	468	386	551	385	442	530	190	353	432	491	483	381	321	348	432	470	327	455	432	374	562
1445	518	4159500	150076202	150076202_ 518	1	1	1	1	1	1	3	1	1	1	1	1	1	1	1	1	1	2	1	1	1	1	1	1	1	1	1	1	1	1	1	1	1	1	1	1	1	1	4
1446	532	4267233	150076492	150076492_ 532	1	3	4	1	1	1	11	5	5	1	1	1	1	3	1	2	1	3	9	1	10	1	1	1	1	7	4	1	1	1	6	1	1	3	1	2	7	6	6
1447	638	5121567	150076340	150076340_ 638	1	2	2	1	1	1	1	1	1	1	1	1	1	1	1	1	3	2	1	1	1	1	1	1	1	1	1	1	1	1	1	1	1	1	1	1	1	1	1
1448	863	6920367	150090149	150090149_ 863	4	1	1	1	1	1	1	1	1	1	1	1	1	1	1	3	1	1	1	1	1	5	1	6	1	1	3	6	5	4	1	1	1	9	1	5	1	3	1
1449	935	7503483	150087143	150087143_ 935	1	1	1	1	1	1	1	1	1	1	1	1	1	1	1	2	1	2	1	1	1	1	1	6	1	1	1	1	1	1	1	1	1	1	1	4	1	1	1
1450	1324	10622500	150086685	150086685_1324	1	1	1	1	1	1	1	1	26	1	1	1	1	1	1	1	1	1	1	1	1	1	1	1	1	1	1	1	18	1	1	1	1	1	1	1	4	1	1
1451	1338	10730217	150089340	150089340_1338	1	1	1	1	1	1	1	1	17	1	1	1	1	1	1	1	1	1	1	1	1	1	1	1	1	1	1	1	15	1	1	1	1	1	1	1	3	1	1
1452	530	4251850	150084061	150084061_ 530	1	1	1	1	1	1	1	1	1	1	1	1	1	1	1	1	1	1	1	7	1	1	1	1	1	1	1	1	1	1	1	1	1	3	1	1	1	1	5
1453	1290	10341583	150136078	150136078_1290	22	19	22	3	1	1	2	1	9	7	1	11	5	3	5	1	1	3	1	1	1	27	1	1	1	1	1	1	4	1	1	1	1	1	1	1	1	1	1
1454	1391	11157434	150134842	150134842_1391	1	1	1	1	1	1	1	1	2	1	1	1	1	1	1	1	1	1	1	1	1	1	1	1	1	1	1	1	6	1	3	1	1	1	1	1	1	1	1
1455	1480	11871350	150135773	150135773_1480	1	1	1	3	1	1	1	1	2	1	1	1	1	1	1	1	1	1	1	1	1	1	1	1	1	1	1	1	1	1	2	1	1	1	1	1	4	1	1
1456	1137	9115800	150137421	150137421_1137	11	13	13	1	1	1	1	1	1	1	1	7	7	1	6	1	1	1	1	1	1	13	1	1	1	1	1	1	1	1	1	1	1	1	1	1	1	1	1
1457	1297	10405033	150138489	150138489_1297	12	1	1	1	1	1	1	1	3	1	1	1	1	1	1	1	1	1	1	1	1	2	1	1	1	1	1	1	1	1	1	1	1	1	1	1	1	1	1
1458	497	3988317	150423965	150423965_ 497	1	1	24	17	1	1	45	1	1	1	1	1	21	1	1	1	1	1	32	1	48	1	23	42	1	1	1	27	31	1	1	1	1	1	1	1	1	1	1
1459	111	892383	150980637	150980637_ 111	4	1	1	1	1	1	6	11	10	1	1	1	1	1	1	1	1	1	1	1	1	1	1	1	1	1	1	1	1	1	1	1	1	1	1	1	1	1	1
1460	1571	12600467	151035370	151035370_1571	3	1	1	3	1	3	1	1	1	1	1	3	1	1	4	3	1	2	1	1	1	1	1	1	1	1	3	1	1	2	1	2	1	1	3	3	1	1	1
1461	663	5323534	151041336	151041336_ 663	1	1	1	1	1	1	4	4	4	1	1	1	4	1	1	1	1	1	1	1	5	1	1	1	1	1	1	1	1	1	1	1	1	1	1	1	1	1	1
1462	725	5819800	151050949	151050949_ 725	1	1	1	1	1	1	4	1	1	1	1	1	1	1	1	1	1	1	1	1	1	3	1	1	1	1	1	2	1	1	1	1	1	1	1	1	1	1	1
1463	401	3220633	151068008	151068008_ 401	1	1	1	1	1	1	7	1	11	1	1	1	1	1	1	1	1	1	1	1	1	1	1	1	1	1	1	1	1	1	5	7	7	1	1	1	1	1	1
1464	109	877000	151081741	151081741_ 109	1	3	1	1	2	1	4	1	1	1	1	1	1	1	1	1	1	1	1	1	1	1	1	1	1	1	1	1	4	1	1	5	4	2	1	1	6	7	1
1465	376	3018667	151078888	151078888_ 376	6	10	7	3	5	3	17	11	3	10	16	8	18	8	11	19	14	14	10	6	9	14	18	24	4	6	8	21	23	19	1	7	4	23	16	19	7	7	9
1466	397	3189850	151076126	151076126_ 397	10	1	8	4	1	1	6	1	1	8	10	3	5	1	3	1	1	5	5	1	16	4	1	11	1	6	6	6	1	1	1	1	1	6	1	4	1	2	11
1467	436	3499733	151074585	151074585_ 436	211	208	208	145	146	102	464	238	250	143	215	127	369	281	244	142	132	128	314	244	386	122	153	191	120	231	202	165	189	107	6	244	215	169	115	89	15	256	258
1468	467	3747883	151077072	151077072_ 467	1	1	1	1	1	1	7	5	1	1	2	1	3	1	1	1	1	1	5	1	5	1	1	2	1	1	1	3	1	1	2	3	1	1	1	1	1	1	1
1469	497	3988317	151079620	151079620_ 497	41	33	38	29	24	18	59	30	36	28	44	26	29	22	30	43	36	38	40	38	55	32	39	52	14	33	41	37	43	37	28	33	37	43	29	40	39	29	49
1470	474	3801733	151083328	151083328_ 474	2	1	1	2	1	1	9	5	4	1	3	1	4	1	1	1	1	1	3	5	6	1	1	1	1	1	1	1	1	1	1	3	1	1	1	1	2	3	1
1471	685	5492816	151077194	151077194_ 685	6	6	1	1	5	1	5	1	1	7	10	1	5	1	1	11	7	9	1	1	4	11	11	7	1	1	5	14	10	7	1	6	1	1	1	9	6	4	1
1472	116	930867	151094269	151094269_ 116	1	1	1	1	1	1	1	1	1	1	1	1	1	1	1	1	1	1	1	4	1	1	1	1	1	1	1	1	1	2	1	1	1	1	1	1	5	1	1
1473	1078	8642517	151096252	151096252_1078	5	1	5	3	5	1	5	4	1	3	3	1	5	1	4	1	1	2	3	1	4	1	1	1	1	4	1	1	1	1	1	1	1	4	1	1	1	1	1
1474	1319	10574417	151097839	151097839_1319	1	1	1	3	1	1	3	3	11	1	1	1	1	1	1	1	1	2	1	1	1	1	1	2	1	1	1	1	17	2	1	1	1	1	1	1	1	1	1
1475	684	5485133	151111313	151111313_ 684	16	1	17	11	1	5	6	1	1	25	28	17	12	6	6	34	28	27	16	8	13	34	32	33	3	1	9	30	28	19	14	1	8	30	18	1	1	15	9
1476	758	6083433	151106628	151106628_ 758	1	1	1	2	3	1	1	1	1	1	3	1	1	1	1	2	1	1	1	1	1	1	1	2	1	1	1	1	1	1	1	1	1	1	1	1	1	1	1
1477	1164	9333350	151109604	151109604_1164	19	23	8	1	1	1	1	1	1	1	1	1	1	2	1	1	1	1	1	1	1	3	1	1	1	1	1	1	1	1	1	1	1	1	1	1	1	1	1
1478	1208	9691116	151108429	151108429_1208	12	12	23	1	1	1	1	1	1	1	1	4	9	7	3	2	1	1	1	1	4	42	1	4	1	1	1	1	4	1	1	2	1	1	1	1	1	1	1
1479	1229	9852800	151111359	151111359_1229	2	4	1	1	1	1	1	1	1	1	1	1	1	1	1	1	1	1	1	1	1	15	1	1	1	1	1	1	1	1	1	1	1	1	1	1	1	1	1
1480	331	2662700	151121902	151121902_ 331	47	40	41	16	10	9	178	51	64	5	5	1	112	71	56	13	11	20	69	1	117	1	7	26	22	33	6	15	27	1	6	24	31	37	7	27	70	14	90
1481	343	2755033	151119293	151119293_ 343	1	1	6	1	1	1	3	1	1	1	1	1	1	1	1	1	1	1	1	1	3	1	1	1	1	1	1	1	1	1	1	1	1	1	1	1	1	1	1
1482	1395	11188216	151114822	151114822_1395	1	1	2	3	1	1	1	1	1	1	1	1	1	1	1	1	1	1	1	1	1	1	1	1	1	1	1	1	9	1	5	1	1	1	1	1	1	1	1
1483	687	5508217	151117157	151117157_ 687	1	1	1	1	1	1	1	1	1	1	1	1	1	1	1	1	1	2	1	1	1	1	1	1	1	1	1	1	1	3	1	1	1	1	1	1	11	1	1
1484	810	6493250	151149109	151149109_ 810	3	1	4	12	20	11	1	1	3	3	8	6	1	1	3	4	3	1	1	1	1	1	1	1	1	1	1	1	4	1	1	1	1	1	1	1	1	1	1
1485	1207	9683416	151147446	151147446_1207	11	8	3	1	1	1	1	1	1	1	1	1	1	1	1	1	1	1	1	1	1	10	1	1	1	1	1	1	1	1	1	1	1	1	1	1	1	1	1
1486	1163	9325650	151146637	151146637_1163	32	32	30	3	1	1	1	1	4	1	1	1	10	9	1	1	1	1	1	1	1	44	1	1	1	1	1	1	1	2	3	1	1	1	1	1	1	1	1
1487	1271	10195383	151147400	151147400_1271	40	32	39	1	1	1	1	4	7	1	1	3	4	1	6	1	1	1	1	1	1	12	1	1	1	1	1	1	10	1	2	1	1	1	2	1	1	1	1
1488	1289	10333883	151148239	151148239_1289	47	46	49	3	5	3	3	4	13	7	15	20	12	11	8	5	1	3	2	1	2	67	1	5	1	1	2	3	10	4	7	3	1	3	2	3	2	1	1
1489	1325	10630183	151149445	151149445_1325	1	1	1	2	1	1	1	1	18	1	1	1	1	1	1	2	1	1	1	1	2	1	1	1	1	1	2	1	12	1	1	1	1	1	2	1	1	1	1
1490	1390	11149734	151150330	151150330_1390	1	1	1	6	1	1	1	1	5	1	1	1	1	1	2	1	1	1	1	1	1	1	1	1	1	1	1	3	9	1	1	1	1	1	1	1	7	1	1
1491	1471	11802100	151149704	151149704_1471	5	5	5	3	1	1	4	6	1	1	1	3	1	1	6	4	1	1	1	4	1	1	1	1	1	1	1	1	4	1	1	4	1	1	1	1	6	1	5
1492	1262	10126117	151738037	151738037_1262	1	1	1	1	4	1	1	1	3	1	1	1	1	1	1	1	1	1	1	1	1	1	1	1	1	4	1	1	1	1	1	1	1	1	1	1	1	1	1
1493	1266	10156900	151759735	151759735_1266	1	1	1	1	4	1	1	1	1	3	4	1	1	1	1	2	1	1	1	1	1	1	1	1	1	1	1	3	1	1	1	2	1	1	1	1	1	1	1
1494	1266	10156900	151817902	151817902_1266	1	1	1	4	1	3	2	1	1	1	1	1	1	1	1	2	1	2	1	1	1	1	1	1	1	1	3	1	1	1	1	2	1	1	1	1	1	1	1
1495	1265	10149200	151839966	151839966_1265	1	1	1	1	4	6	5	8	3	1	3	5	1	1	3	1	3	1	1	1	1	1	1	1	1	1	1	3	1	1	1	1	1	1	1	1	1	1	1
1496	1268	10172283	151868439	151868439_1268	1	1	1	1	6	4	1	5	1	1	1	1	1	1	3	4	1	1	3	1	1	1	1	1	1	4	2	1	1	1	1	3	1	5	1	1	1	1	1
1497	1264	10141517	151917892	151917892_1264	1	2	1	1	1	1	1	1	1	1	1	1	1	1	1	1	1	1	4	1	1	1	1	3	1	1	1	1	1	1	3	2	1	1	1	1	1	1	1
1498	1264	10141517	151946823	151946823_1264	1	1	1	7	7	7	7	1	1	1	1	6	1	1	1	1	3	1	3	1	7	1	1	1	1	1	1	1	6	4	1	1	1	5	1	1	1	1	2
1499	1577	12646633	151944321	151944321_1577	1	3	1	3	3	1	2	1	1	4	1	1	4	3	1	1	3	1	3	1	2	1	1	3	1	2	1	1	1	1	3	1	3	2	1	1	1	1	2
1500	1267	10164600	151966858	151966858_1267	1	1	1	1	11	7	1	6	4	1	1	6	3	1	5	1	1	1	1	1	1	1	6	3	1	1	1	4	3	1	2	1	2	5	1	3	4	6	1
1501	1263	10133817	151999451	151999451_1263	1	1	1	4	1	5	1	1	1	5	5	4	1	1	4	1	1	1	3	1	3	1	1	1	1	1	1	1	3	1	1	1	1	5	1	1	1	1	1
1502	477	3824817	152015686	152015686_ 477	7	8	7	1	4	1	23	11	13	1	1	1	6	3	1	1	1	1	15	10	18	1	5	7	1	6	8	1	6	1	6	12	5	2	1	5	9	9	6
1503	606	4865633	152017853	152017853_ 606	1	1	1	1	1	1	2	1	1	1	3	1	1	1	3	1	1	2	1	1	1	1	1	1	1	3	2	1	1	1	2	1	1	2	1	2	1	1	1
1504	382	3064833	152048050	152048050_ 382	1	19	1	1	3	1	4	3	1	1	1	1	1	1	6	1	1	1	6	4	1	1	1	1	1	1	1	1	2	1	2	1	1	1	1	1	1	1	1
1505	450	3607467	152053711	152053711_ 450	13	1	1	1	1	1	1	1	1	1	1	1	1	1	1	1	3	1	1	1	1	1	1	1	1	1	1	1	1	1	1	1	1	1	1	1	2	1	1
1506	525	4213367	152049057	152049057_ 525	7	1	1	1	1	1	1	1	1	1	1	1	1	1	1	1	1	2	1	1	1	1	1	1	1	1	1	1	4	1	1	1	1	1	1	1	1	1	1
1507	805	6454683	152046417	152046417_ 805	1	1	1	1	1	1	1	1	1	1	1	1	1	1	1	1	1	1	1	1	1	1	1	1	1	1	1	1	4	1	1	1	1	1	2	3	1	1	1
1508	1268	10172283	152046844	152046844_1268	1	1	1	1	8	9	10	1	4	1	1	1	5	1	8	1	3	1	1	1	4	7	3	1	1	4	5	1	1	1	1	6	1	1	1	1	1	3	1
1509	190	1529367	152068665	152068665_ 190	6	9	8	1	1	1	3	1	3	1	2	1	4	7	3	1	3	3	5	4	8	5	2	9	5	5	4	9	9	6	9	11	1	8	5	8	11	11	7
1510	257	2064300	152067368	152067368_ 257	10	11	9	1	1	1	4	4	6	1	1	1	8	7	3	1	5	1	4	5	5	2	1	1	2	4	3	2	14	1	6	5	2	1	1	1	5	6	2
1511	281	2258667	152067688	152067688_ 281	2	2	6	1	1	1	3	1	4	1	1	1	5	2	1	1	1	2	2	1	5	1	1	1	1	1	1	1	8	1	2	3	1	1	1	1	1	2	1
1512	381	3057133	152063522	152063522_ 381	20	1	17	3	4	3	16	1	4	5	9	1	11	6	3	21	17	8	10	2	7	4	1	11	2	3	2	2	1	1	7	2	1	1	5	2	2	2	2
1513	447	3584383	152066254	152066254_ 447	1	1	1	1	1	1	2	1	1	1	1	1	1	1	1	1	1	1	1	1	1	1	1	1	1	1	1	1	1	1	4	1	1	1	1	3	2	1	2
1514	559	4484684	152065048	152065048_ 559	2	11	12	1	2	1	2	1	1	1	1	1	1	1	1	1	3	3	1	1	1	1	5	1	1	1	1	1	7	1	1	3	1	3	2	5	1	2	1
1515	627	5027317	152064987	152064987_ 627	1	1	1	1	1	5	1	1	1	1	1	1	1	1	1	1	1	1	2	1	1	1	1	1	1	1	1	2	1	1	1	1	1	1	1	2	2	1	1
1516	95	769267	152073532	152073532_ 95	1	2	1	1	1	1	1	1	1	1	1	1	1	1	1	1	1	1	1	1	1	1	1	1	1	1	1	1	4	1	1	1	1	1	1	1	1	1	2
1517	108	869300	152071671	152071671_ 108	16	20	17	8	6	6	7	33	23	1	23	12	18	6	9	1	6	9	5	3	16	15	15	16	6	1	9	17	23	14	11	14	13	17	16	15	17	4	11
1518	398	3197550	152071213	152071213_ 398	25	28	36	2	13	7	89	29	47	7	26	13	125	73	73	19	13	11	113	76	141	25	24	30	37	80	64	41	36	10	93	103	70	38	20	15	106	97	85
1519	436	3499733	152077744	152077744_ 436	20	26	24	9	6	6	48	21	25	13	14	11	35	28	30	16	13	15	31	20	39	10	13	21	18	22	16	18	25	10	12	25	20	17	10	11	11	31	23
1520	314	2522283	152083740	152083740_ 314	1	1	1	1	1	1	1	1	1	1	1	1	1	1	1	1	1	1	1	1	1	1	1	2	1	1	1	2	1	1	1	1	1	1	2	1	1	1	1
1521	542	4353783	152080917	152080917_ 542	1	1	2	1	1	2	2	1	1	1	1	1	1	1	1	1	1	1	2	1	1	1	1	1	1	1	1	1	1	1	1	1	1	1	1	1	1	1	1
1522	1267	10164600	152084778	152084778_1267	1	1	1	1	6	7	3	1	1	6	1	5	3	1	1	1	1	1	1	1	3	3	3	1	1	1	1	1	1	1	1	1	4	1	1	1	1	1	1
1523	449	3599767	152104736	152104736_ 449	1	1	1	2	1	1	1	1	1	4	9	5	1	1	1	1	1	1	1	3	1	1	1	1	1	1	1	1	1	1	1	1	1	1	1	1	1	1	1
1524	1264	10141517	152103500	152103500_1264	1	1	1	3	1	1	1	1	4	1	1	6	1	1	1	1	1	1	2	1	1	1	1	1	1	1	1	1	1	1	1	1	1	1	1	3	1	3	1
1525	689	5523600	152114151	152114151_ 689	1	1	1	1	1	1	1	1	1	2	7	3	1	1	1	1	1	4	1	1	1	1	3	1	1	1	1	1	5	3	1	1	1	4	1	4	1	1	1
1526	331	2662700	152126144	152126144_ 331	5	4	4	1	1	1	1	5	6	1	1	1	12	8	6	1	1	1	7	3	5	1	1	3	1	3	1	1	1	1	1	1	1	1	1	1	1	1	8
1527	1288	10326183	152143951	152143951_1288	5	8	1	1	7	1	6	1	3	1	1	1	1	1	1	4	2	2	1	1	1	10	3	1	1	1	1	1	1	1	1	1	2	1	1	4	1	3	1
1528	1266	10156900	152177628	152177628_1266	1	1	1	7	1	1	1	4	1	1	1	4	1	1	3	6	2	1	1	4	1	1	1	1	1	1	1	1	1	3	1	3	1	1	2	1	1	5	1
1529	1269	10179983	152212112	152212112_1269	1	1	1	1	6	1	1	1	3	1	1	1	1	1	1	1	1	1	1	2	1	1	1	1	1	1	1	5	1	1	1	3	1	1	1	1	1	1	1
1530	1267	10164600	152248077	152248077_1267	1	1	1	1	1	5	1	1	1	4	1	1	1	1	4	1	1	2	4	1	3	1	1	1	1	1	1	1	1	1	1	1	1	1	1	1	1	3	1
1531	1265	10149200	152279678	152279678_1265	1	1	1	4	1	1	1	1	1	1	6	1	3	1	5	1	1	1	1	1	1	1	1	1	1	1	1	3	2	2	3	1	1	1	1	1	4	1	1
1532	1267	10164600	152322647	152322647_1267	1	1	1	1	1	2	4	1	1	3	1	1	1	1	1	1	1	1	1	1	1	1	1	1	1	1	1	1	1	1	1	1	1	1	1	1	1	1	1
1533	1266	10156900	152364960	152364960_1266	1	1	1	3	1	1	1	4	1	4	1	1	1	1	1	1	1	2	1	1	1	1	2	1	1	1	1	1	1	1	1	1	1	1	1	1	1	1	1
1534	1648	13212267	152993027	152993027_1648	1	1	1	3	1	1	1	1	1	1	1	1	4	1	1	1	2	1	4	1	1	1	1	1	1	1	2	3	1	1	1	1	1	1	1	1	1	1	2
1535	1638	13135317	152996857	152996857_1638	3	1	1	7	5	6	5	3	1	6	3	3	3	4	3	1	2	1	2	1	1	2	1	1	2	1	3	3	1	2	3	1	1	1	1	3	3	3	1
1536	108	869300	153041565	153041565_ 108	8	1	1	11	14	7	1	1	1	1	1	3	1	1	1	1	1	1	1	1	1	1	1	1	1	1	1	1	1	1	1	1	1	1	1	1	1	1	1
1537	136	1094550	153041824	153041824_ 136	9	11	8	11	12	5	1	1	1	1	15	4	1	1	1	2	1	2	1	1	1	1	1	1	1	1	1	1	1	1	1	1	1	1	1	1	1	1	1
1538	686	5500517	153050705	153050705_ 686	1	3	3	1	1	1	1	1	1	1	1	1	1	1	1	1	1	1	1	1	2	1	1	1	1	1	1	1	4	1	1	1	1	1	3	1	1	2	1
1539	625	5011933	153057678	153057678_ 625	3	1	1	11	9	6	1	1	1	14	20	7	1	1	1	1	8	6	1	1	1	8	6	10	1	1	1	7	10	5	1	1	1	3	6	4	1	1	1
1540	109	877000	153069534	153069534_ 109	1	1	1	3	1	1	1	3	1	2	1	1	1	1	1	1	1	1	3	1	4	1	1	3	1	3	1	1	3	1	4	3	1	1	1	1	1	1	1
1541	379	3041750	153068024	153068024_ 379	6	6	5	3	2	1	8	4	3	3	1	1	11	11	6	5	4	4	12	13	13	1	4	3	7	14	8	5	5	1	14	7	9	1	5	1	14	21	6
1542	388	3111000	153065308	153065308_ 388	1	1	1	1	1	1	1	1	1	1	1	1	1	1	1	1	1	1	1	1	9	1	1	1	1	7	1	1	1	1	5	1	1	1	1	1	1	7	6
1543	388	3111000	153069946	153069946_ 388	8	1	6	1	1	1	1	2	1	1	1	1	13	6	7	1	1	1	9	5	15	1	1	1	4	9	8	1	3	1	8	10	1	1	1	1	11	6	7
1544	452	3632450	153066849	153066849_ 452	1	1	1	1	1	1	1	1	1	1	1	1	9	1	1	1	1	4	9	1	1	4	1	5	1	7	6	1	1	1	5	10	7	1	1	1	9	8	1
1545	532	4267233	153067200	153067200_ 532	8	7	6	6	6	2	14	7	7	4	5	7	14	12	10	6	4	3	12	9	13	5	4	6	3	8	5	6	7	7	8	7	5	7	4	5	11	8	8
1546	757	6075733	153090897	153090897_ 757	1	4	5	3	8	7	1	1	1	8	13	3	1	1	1	2	7	7	1	1	1	2	4	1	1	1	1	2	2	4	1	1	1	3	2	1	1	1	1
1547	769	6168067	153089539	153089539_ 769	1	1	1	1	1	1	1	1	1	1	4	1	1	1	1	1	3	4	1	1	1	1	2	1	1	1	1	2	1	1	1	1	1	1	1	1	1	1	1
1548	823	6602983	153091965	153091965_ 823	1	1	1	4	8	1	1	1	1	2	1	1	1	1	1	1	3	1	1	1	1	3	4	6	1	1	1	5	5	6	1	1	1	4	3	1	1	1	1
1549	832	6672233	153091965	153091965_ 832	1	1	1	1	7	1	1	1	1	1	1	1	1	1	1	1	1	1	1	1	1	1	1	1	1	1	1	5	3	1	1	1	1	1	1	1	1	1	1
1550	1044	8371300	153091278	153091278_1044	5	4	7	2	1	1	1	1	1	1	1	1	1	1	1	1	4	8	1	1	1	1	6	12	1	1	1	1	6	4	1	1	1	3	5	7	1	1	1
1551	1212	9721900	153090820	153090820_1212	4	1	4	7	5	5	1	1	1	1	1	1	1	1	1	4	1	1	3	3	6	1	4	6	1	1	1	9	4	6	1	1	1	1	1	5	7	1	8
1552	1404	11257466	153095261	153095261_1404	1	1	1	1	1	1	1	1	1	1	1	1	1	1	1	2	1	1	1	1	1	2	1	1	1	1	1	2	1	1	1	1	1	1	1	1	1	1	1
1553	195	1567833	153100967	153100967_ 195	12	16	12	1	4	1	15	11	13	1	8	1	21	22	11	6	3	6	14	10	21	7	5	9	8	10	8	6	1	6	11	14	9	1	1	6	12	10	10
1554	332	2670400	153100021	153100021_ 332	4	4	4	1	1	1	7	3	3	1	8	1	1	2	3	2	3	3	4	3	1	1	5	8	1	1	2	2	8	1	1	5	1	5	1	5	1	5	1
1555	409	3282283	153100937	153100937_ 409	4	1	5	2	3	1	4	5	6	2	1	1	6	8	1	2	3	3	5	5	1	1	1	5	2	1	2	8	1	3	3	7	5	9	1	10	7	7	5
1556	472	3786350	153099747	153099747_ 472	1	1	1	1	1	1	1	1	1	1	1	1	1	2	1	1	1	1	1	1	1	1	1	1	1	1	1	2	1	3	1	1	1	1	1	1	1	2	1
1557	624	5004233	153098953	153098953_ 624	1	2	4	1	1	1	1	5	1	8	6	6	1	2	1	9	7	5	1	1	1	4	10	14	1	1	1	11	12	1	1	1	1	8	9	10	1	1	1
1558	667	5354317	153102219	153102219_ 667	1	1	3	1	1	1	6	3	5	1	16	4	1	1	1	7	6	5	5	1	3	5	12	16	1	1	1	7	18	6	1	3	1	8	8	7	1	1	1
1559	109	877000	153106171	153106171_ 109	1	1	1	1	1	1	3	3	1	1	1	1	1	1	1	1	1	1	4	1	1	1	2	1	1	1	4	2	1	1	6	1	3	1	1	1	1	1	3
1560	196	1575533	153106766	153106766_ 196	1	1	1	1	1	1	3	1	1	3	1	1	3	1	1	1	1	4	1	1	1	1	1	1	1	1	10	1	1	1	1	2	1	1	1	1	1	2	5
1561	1382	11088183	153110168	153110168_1382	1	1	1	1	1	1	3	1	4	1	1	1	1	1	4	2	1	1	1	1	1	1	1	1	1	1	2	2	1	1	1	1	1	3	1	1	8	1	1
1562	1473	11817483	153116379	153116379_1473	1	1	1	1	1	1	1	1	1	1	1	1	6	1	1	1	1	2	1	1	1	1	1	1	1	1	1	1	1	1	1	2	1	1	1	1	1	1	1
1563	329	2637717	153109146	153109146_ 329	1	1	1	1	1	1	1	1	3	1	1	1	1	1	1	1	1	1	1	1	1	1	1	1	2	1	1	7	1	1	1	4	1	1	1	1	1	1	1
1564	406	3259200	153124588	153124588_ 406	1	6	1	1	1	1	1	1	1	1	1	1	1	1	1	1	1	3	1	1	1	1	1	5	1	1	1	3	1	1	1	1	1	1	1	1	1	1	1
1565	735	5896750	153124496	153124496_ 735	1	1	1	1	1	1	1	1	1	1	1	1	1	1	1	3	1	1	1	1	1	1	3	2	1	1	1	1	4	3	1	1	1	4	1	1	1	1	1
1566	1096	8790617	153127975	153127975_1096	6	5	4	1	1	1	1	1	1	1	1	1	1	1	1	1	1	1	1	1	1	4	1	1	1	1	1	1	1	1	1	1	1	1	1	1	1	1	1
1567	1137	9115800	153127045	153127045_1137	88	86	80	1	1	1	1	1	1	25	17	38	58	70	40	1	1	1	1	1	1	51	1	1	1	1	1	1	1	1	1	1	1	1	1	1	1	1	1
1568	1208	9691116	153128479	153128479_1208	9	22	9	2	1	1	1	1	1	1	1	4	1	3	5	1	1	1	1	1	1	41	1	1	1	1	1	1	1	1	1	1	1	1	1	1	1	1	1
1569	1236	9916266	153129044	153129044_1236	7	9	1	1	1	1	1	1	1	1	1	1	1	1	1	1	1	1	1	1	1	19	1	1	1	1	1	1	1	1	1	1	1	1	1	1	1	1	1
1570	1272	10203067	153127838	153127838_1272	129	120	122	10	9	1	14	11	8	36	72	93	45	43	45	1	5	4	1	3	6	74	9	7	1	1	3	9	15	5	1	5	1	4	4	6	13	6	4
1571	1288	10326183	153127869	153127869_1288	69	78	64	1	1	1	1	1	12	7	11	9	9	1	1	1	1	1	1	1	1	1	1	1	1	1	1	1	12	1	1	1	1	1	1	1	1	1	1
1572	1380	11063200	153129944	153129944_1380	4	3	6	10	1	1	1	4	10	1	1	1	1	1	1	1	1	1	1	1	1	5	1	1	1	1	1	1	14	1	11	1	1	1	1	1	8	1	1
1573	1468	11769417	153127930	153127930_1468	7	6	7	7	6	2	9	9	6	6	1	8	5	1	9	5	3	1	2	6	1	1	3	1	1	7	1	3	4	4	3	1	1	1	3	3	9	1	5
1574	386	3095617	153136902	153136902_ 386	4	1	5	1	1	1	11	1	6	1	1	1	5	4	1	1	1	1	5	1	8	1	1	1	1	1	1	1	1	1	1	2	2	1	1	1	1	1	4
1575	407	3266900	153137421	153137421_ 407	9	11	8	1	3	1	36	11	14	2	1	1	24	14	10	4	1	3	13	7	24	1	4	1	1	7	5	4	1	2	5	5	6	10	3	8	15	4	13
1576	465	3732483	153136688	153136688_ 465	5	1	1	1	1	1	6	5	5	1	1	1	7	5	4	3	1	1	3	3	1	1	1	4	1	5	1	1	3	1	3	4	6	1	1	3	6	7	6
1577	1396	11195900	153132172	153132172_1396	1	1	1	8	1	1	1	1	2	1	1	1	1	1	1	1	1	1	1	1	1	1	1	1	1	1	1	1	7	1	1	1	1	1	1	1	3	1	1
1578	1579	12662033	153938385	153938385_1579	1	1	1	2	1	3	1	1	1	1	1	1	1	1	1	1	1	1	1	1	1	1	1	1	1	1	1	1	1	1	1	1	1	1	2	1	1	1	2
1579	1583	12692817	153997330	153997330_1583	1	1	1	4	1	3	1	1	1	1	1	2	1	1	1	3	1	3	1	1	1	2	2	1	1	1	1	1	1	2	1	3	1	1	1	1	2	1	1
1580	110	884700	154035843	154035843_ 110	3	3	3	1	1	1	1	1	1	1	4	1	1	1	1	1	1	1	1	1	1	1	1	1	1	1	1	1	1	1	1	1	1	1	1	1	1	1	1
1581	955	7657467	154047562	154047562_ 955	1	1	1	1	1	1	1	1	1	1	1	1	1	1	1	1	1	1	1	1	1	1	1	1	1	1	1	3	1	1	1	1	1	6	1	3	1	1	1
1582	1247	10001100	154051544	154051544_1247	1	1	1	1	1	1	1	1	1	1	1	1	1	1	1	1	1	1	1	1	1	3	3	14	1	1	1	5	3	1	1	1	1	1	1	1	1	1	1
1583	1282	10280017	154049118	154049118_1282	1	1	1	1	1	1	1	1	1	1	1	1	1	1	1	4	3	10	1	1	1	4	11	27	1	1	1	7	7	6	1	1	1	2	1	5	1	1	1
1584	1306	10474300	154050354	154050354_1306	1	1	1	1	1	1	1	1	1	1	1	1	1	1	1	3	1	6	1	1	1	1	7	19	1	1	1	1	1	5	1	1	1	2	1	1	1	1	1
1585	552	4430817	154057983	154057983_ 552	3	5	1	3	5	1	1	1	1	1	18	5	1	1	1	1	3	1	5	3	1	1	1	1	4	9	1	1	7	1	1	1	1	1	1	1	1	1	1
1586	624	5004233	154062103	154062103_ 624	41	37	41	58	55	34	4	1	1	91	140	66	1	1	1	66	52	48	12	2	5	45	45	61	1	6	4	2	60	41	3	3	1	31	30	25	1	6	3
1587	693	5563967	154061874	154061874_ 693	12	9	9	1	5	1	1	1	1	1	22	15	3	1	6	15	13	1	3	1	6	17	17	21	1	6	3	19	23	19	7	7	1	14	14	17	6	1	5
1588	1298	10412733	154058594	154058594_1298	1	1	1	1	1	1	1	1	1	1	1	1	1	1	1	2	1	1	1	1	1	1	1	8	1	1	1	4	1	1	1	1	1	1	1	1	1	1	1
1589	110	884700	154077362	154077362_ 110	1	1	1	1	1	1	12	1	1	1	1	1	1	1	1	2	1	2	2	1	1	1	5	1	1	1	1	1	1	1	1	1	1	1	1	1	1	1	1
1590	1282	10280017	154060654	154060654_1282	1	1	1	1	1	1	1	1	1	1	1	1	1	1	1	5	5	2	1	1	1	1	1	2	1	1	1	4	1	1	1	1	1	1	1	3	1	1	1
1591	393	3159067	154076416	154076416_ 393	1	1	1	1	1	1	5	1	1	1	1	1	2	1	1	1	1	1	4	1	1	1	4	1	1	1	5	1	1	1	4	2	1	1	1	1	1	4	1
1592	399	3205233	154075577	154075577_ 399	7	13	5	4	4	3	13	11	12	1	8	6	13	9	6	4	6	5	9	1	14	1	5	8	1	1	5	5	11	6	8	10	3	4	3	5	9	10	7
1593	460	3694017	154077866	154077866_ 460	9	8	11	1	4	1	13	10	9	6	6	1	10	10	6	1	1	7	1	7	8	1	4	1	1	1	6	9	1	1	13	1	7	10	1	1	8	8	7
1594	470	3770967	154074463	154074463_ 470	24	22	27	8	13	13	31	22	27	15	20	10	29	23	19	16	11	15	10	23	32	6	15	21	13	22	18	15	19	15	17	22	20	19	12	15	23	22	23
1595	487	3911367	154075577	154075577_ 487	7	9	2	1	6	1	1	5	3	1	1	1	1	8	6	1	1	1	1	1	1	1	1	1	1	1	1	1	1	1	4	1	1	1	2	1	8	1	1
1596	494	3965233	154076538	154076538_ 494	14	15	14	1	10	3	22	12	12	7	10	5	21	10	14	7	6	8	19	10	15	1	8	10	5	10	11	9	11	8	7	16	14	12	5	7	19	19	15
1597	518	4159500	154074615	154074615_ 518	39	42	42	29	27	21	59	45	38	30	35	28	57	46	42	27	29	23	45	41	53	29	30	35	27	41	36	35	34	24	34	39	36	26	25	23	50	44	38
1598	556	4461600	154072845	154072845_ 556	4	1	1	1	1	3	1	1	1	7	1	1	1	1	1	4	1	1	1	1	1	1	1	1	1	1	1	1	1	1	1	1	1	1	1	1	1	1	1
1599	625	5011933	154068481	154068481_ 625	1	1	1	1	1	1	1	1	1	1	1	1	4	1	1	1	1	1	1	1	5	1	1	2	1	1	1	1	1	1	1	1	1	1	1	1	1	1	1
1600	696	5587067	154070190	154070190_ 696	1	1	1	2	1	1	1	1	1	1	1	1	3	1	1	1	1	14	8	1	1	1	1	1	1	1	4	1	3	1	3	1	5	1	1	1	1	1	1
1601	109	877000	154085831	154085831_ 109	5	4	8	6	4	1	4	5	9	1	7	4	12	3	4	1	5	2	8	1	6	5	1	6	1	6	6	5	7	1	7	7	1	6	3	6	4	2	5
1602	479	3840217	154091599	154091599_ 479	1	1	1	1	1	1	1	1	1	1	1	1	1	1	1	1	1	1	1	1	1	4	1	3	1	1	1	1	7	1	1	1	1	1	1	6	1	1	1
1603	620	4973467	154095200	154095200_ 620	1	1	1	1	1	1	1	1	1	1	1	1	1	1	1	1	1	1	1	1	1	1	1	2	1	1	1	1	1	3	1	1	1	3	1	1	1	1	1
1604	547	4392250	154121063	154121063_ 547	1	1	1	1	1	1	1	1	1	1	6	1	1	1	1	7	4	3	1	1	1	7	6	13	1	1	1	8	12	6	1	1	1	7	3	6	1	1	1
1605	1208	9691116	154123077	154123077_1208	10	13	12	1	1	1	1	1	1	1	1	1	1	1	1	1	1	1	1	1	1	45	1	1	1	1	1	1	1	1	1	1	1	1	1	1	1	1	1
1606	1539	12344633	154121002	154121002_1539	1	1	1	2	1	1	1	1	1	1	1	1	1	1	1	1	1	1	1	1	1	1	1	1	1	1	1	3	1	2	1	1	1	2	3	1	1	1	1
1607	349	2801217	154122253	154122253_ 349	1	1	1	1	1	1	1	1	1	1	1	1	2	1	1	1	1	1	1	1	3	1	1	1	1	1	1	1	1	1	1	1	3	1	1	1	1	1	2
1608	823	6602983	154130539	154130539_ 823	3	1	3	1	1	1	1	1	1	1	1	1	1	1	1	1	3	1	1	1	1	1	1	1	1	1	1	2	1	1	1	1	1	1	1	1	1	1	1
1609	1274	10218467	154127823	154127823_1274	10	7	15	1	1	4	1	1	1	1	8	7	3	5	3	1	1	1	1	1	1	14	1	1	1	1	1	1	6	1	1	1	1	1	1	1	1	1	1
1610	465	3732483	154134857	154134857_ 465	1	1	1	1	1	1	1	1	3	1	1	1	1	1	1	1	1	1	1	1	1	1	1	1	1	1	1	1	1	1	3	1	2	1	1	1	2	1	1
1611	1139	9131200	154130829	154130829_1139	8	11	10	1	1	1	1	1	1	3	1	3	7	8	4	1	1	1	1	1	1	4	1	1	1	1	1	1	1	1	1	1	1	1	1	1	1	1	1
1612	1400	11226684	154132614	154132614_1400	1	11	1	1	7	11	9	3	1	1	1	1	1	5	1	1	4	3	9	5	3	1	1	5	3	1	1	1	4	15	7	7	1	3	1	23	15	15	11
1613	1432	11482717	154133698	154133698_1432	1	36	1	1	56	55	28	36	8	8	25	7	14	38	7	2	13	7	12	11	8	1	9	15	10	2	6	4	37	30	28	12	14	3	74	34	50	23	22
1614	1435	11505800	154133591	154133591_1435	1	8	1	1	2	4	14	4	1	1	1	1	1	1	1	2	1	1	1	1	1	1	1	1	1	1	1	1	1	4	10	1	1	1	1	1	3	1	6
1615	1488	11932917	154135452	154135452_1488	1	7	1	2	1	1	1	3	1	1	1	1	1	1	1	4	1	6	1	2	1	1	1	1	1	1	1	1	1	1	1	1	1	7	4	1	1	1	1
1616	1542	12367717	154135315	154135315_1542	6	5	3	2	1	1	1	1	1	1	1	1	1	1	1	1	1	1	1	1	1	1	1	1	1	1	1	1	3	3	1	2	1	3	1	1	1	1	3
1617	596	4779083	154158966	154158966_ 596	41	36	43	23	20	12	52	35	8	23	33	20	50	45	30	20	18	21	50	35	50	19	25	29	24	41	28	27	28	18	33	4	28	27	24	19	50	48	41
1618	607	4873333	154159760	154159760_ 607	8	7	6	3	4	1	16	1	1	4	6	4	14	10	1	4	1	1	8	9	11	2	4	5	4	8	9	5	8	1	9	1	9	1	1	1	9	1	10
1619	103	830833	154945877	154945877_ 103	1	1	1	1	1	1	1	1	1	1	1	1	1	1	1	1	1	1	1	1	1	2	1	1	1	1	1	1	1	1	1	1	1	2	2	1	1	1	1
1620	1595	12794750	154989151	154989151_1595	1	16	1	1	1	8	1	8	1	1	1	1	1	1	1	1	1	1	1	1	1	1	1	1	1	1	30	1	1	7	1	1	1	7	1	1	18	1	18
1621	1640	13150700	154991074	154991074_1640	47	24	30	113	113	104	99	101	111	100	95	1	104	1	61	72	1	11	1	1	1	1	36	1	1	15	36	56	40	30	1	22	1	46	1	45	42	1	41
1622	1674	13421933	154991592	154991592_1674	9	11	1	1	12	1	1	12	1	1	1	1	1	1	1	1	1	1	1	1	1	1	1	1	1	1	40	1	1	22	1	40	1	12	1	1	1	1	1
1623	432	3468950	155050995	155050995_ 432	1	1	1	2	1	1	10	7	7	1	1	1	6	1	1	1	1	1	1	1	1	1	1	1	1	1	1	1	1	1	1	1	1	1	1	1	1	1	1
1624	694	5571667	155067642	155067642_ 694	1	1	6	4	1	1	1	1	1	12	14	11	1	1	1	14	1	16	5	4	8	10	13	18	1	6	2	12	22	13	1	7	1	13	13	1	6	6	1
1625	622	4988850	155070648	155070648_ 622	8	5	5	1	5	5	1	1	1	1	16	1	1	1	1	3	1	7	1	1	2	7	1	6	1	1	1	7	8	1	1	1	1	1	1	1	1	1	1
1626	124	1002117	155081940	155081940_ 124	3	4	1	5	3	1	15	1	7	1	5	2	8	1	3	1	1	2	8	4	25	1	4	5	1	1	5	1	4	1	5	13	1	1	1	1	5	4	3
1627	175	1404333	155081421	155081421_ 175	23	23	25	8	12	1	51	23	23	7	17	1	31	35	19	11	10	9	22	22	29	8	14	1	11	18	14	12	1	11	19	23	15	1	1	12	26	21	19
1628	374	3003267	155081741	155081741_ 374	4	5	1	2	1	1	7	4	1	1	1	1	1	3	4	2	1	1	4	2	5	1	2	1	1	1	1	1	1	1	1	1	1	3	2	1	1	4	4
1629	386	3095617	155080994	155080994_ 386	29	27	26	14	13	9	33	21	26	19	17	15	33	28	26	16	14	15	26	21	34	10	16	22	16	20	18	18	18	1	25	25	18	17	12	12	30	22	23
1630	399	3205233	155081177	155081177_ 399	5	1	1	1	1	1	5	1	1	1	1	1	1	1	1	1	1	1	1	1	1	1	1	1	1	1	1	1	1	1	1	1	1	1	1	1	1	1	3
1631	459	3686317	155084778	155084778_ 459	1	1	3	2	1	1	1	1	1	1	2	1	1	2	1	1	1	1	1	1	1	1	1	1	1	1	1	1	1	1	1	1	1	1	1	1	1	1	1
1632	470	3770967	155081421	155081421_ 470	13	14	12	6	6	4	21	12	12	5	5	7	15	11	5	6	1	6	10	10	15	3	7	7	6	9	5	8	10	5	10	9	11	6	4	5	8	11	14
1633	490	3934450	155080429	155080429_ 490	5	7	4	3	10	1	11	10	3	1	3	5	1	7	7	3	1	2	7	7	10	2	5	1	1	5	3	1	4	1	4	6	2	1	1	1	5	4	4
1634	533	4274933	155082047	155082047_ 533	8	8	8	6	4	3	14	10	8	4	5	5	10	8	7	4	3	3	11	7	9	3	5	6	5	7	6	1	7	1	7	9	5	3	1	5	1	7	9
1635	537	4305717	155104706	155104706_ 537	1	1	1	2	1	1	1	1	1	1	6	1	1	1	1	1	1	1	1	1	1	1	1	1	1	1	1	1	3	4	1	1	1	1	1	1	4	1	1
1636	618	4958066	155106628	155106628_ 618	10	1	11	6	1	4	1	1	1	14	26	17	3	1	3	19	14	12	6	1	2	14	10	18	1	1	3	14	20	10	1	1	1	11	7	7	4	3	1
1637	754	6052650	155107117	155107117_ 754	6	9	1	26	33	21	1	1	1	21	41	17	1	1	1	15	17	20	3	1	1	1	14	23	1	1	1	14	17	11	1	1	1	10	1	7	1	1	1
1638	772	6191167	155106827	155106827_ 772	1	1	1	6	5	2	1	1	1	3	7	3	1	1	1	1	1	5	1	1	1	1	1	5	1	1	1	1	1	1	1	1	1	1	1	1	1	1	1
1639	824	6610683	155106567	155106567_ 824	3	1	1	21	18	16	1	1	1	2	21	6	1	1	1	13	10	14	1	1	1	8	14	19	1	1	1	8	14	9	1	1	1	7	1	8	1	1	1
1640	832	6672233	155107086	155107086_ 832	1	1	1	3	12	8	1	1	1	1	4	1	1	1	1	1	1	3	1	1	1	1	11	6	1	1	1	8	1	1	1	1	1	2	1	10	1	1	1
1641	1164	9333350	155108612	155108612_1164	5	7	7	1	1	1	1	1	1	1	1	1	1	2	1	1	1	1	1	1	1	1	1	1	1	1	1	1	1	1	1	1	1	1	1	1	1	1	1
1642	429	3445867	155116730	155116730_ 429	9	4	7	5	9	3	15	4	7	9	8	6	12	4	5	2	8	12	13	4	11	4	8	10	1	4	1	7	12	7	5	3	5	9	6	6	5	5	9
1643	448	3592083	155115662	155115662_ 448	1	1	1	1	1	1	1	1	2	1	1	1	1	1	6	1	1	1	1	1	7	1	1	1	1	1	1	1	5	1	1	1	1	1	1	1	1	1	4
1644	463	3717100	155116577	155116577_ 463	1	1	3	1	1	1	8	1	4	3	3	1	6	1	5	1	6	1	5	1	5	1	1	1	1	5	1	1	3	1	1	1	1	2	1	2	5	1	6
1645	681	5462033	155110245	155110245_ 681	1	1	1	11	13	9	1	1	1	9	9	8	1	1	1	1	1	2	1	1	1	1	1	2	1	1	1	1	1	1	1	1	1	1	1	3	1	1	1
1646	1282	10280017	155115738	155115738_1282	1	1	1	4	1	1	1	1	1	1	1	1	1	1	3	1	1	1	1	1	1	1	1	1	1	1	2	1	1	1	2	1	1	1	1	1	1	1	1
1647	405	3251433	155118393	155118393_ 405	76	72	74	57	66	27	129	35	67	74	101	41	78	60	56	62	67	71	79	45	96	35	61	109	19	42	30	65	92	40	34	4	28	62	44	61	40	41	53
1648	1534	12306167	155126831	155126831_1534	2	1	1	1	1	1	1	1	1	1	1	1	1	1	1	1	1	1	1	1	1	2	1	1	1	2	1	1	1	1	1	1	1	1	1	1	1	1	1
1649	1165	9341050	155136475	155136475_1165	6	7	8	1	1	1	2	1	1	1	1	1	1	3	1	1	1	1	1	1	1	6	1	1	1	1	1	1	1	1	1	1	1	1	1	1	1	1	1
1650	1433	11490400	155134964	155134964_1433	1	1	1	1	5	6	1	1	1	1	1	1	2	4	1	1	1	2	1	1	1	1	1	1	1	1	1	1	4	1	1	2	1	1	6	1	1	1	1
1651	1289	10333883	155143326	155143326_1289	6	5	7	1	1	1	1	1	1	1	1	1	1	1	1	1	1	1	1	1	1	5	1	1	1	1	1	1	1	1	1	1	1	1	1	1	1	1	1
1652	1296	10397350	155146973	155146973_1296	5	7	7	1	1	1	1	2	1	1	1	4	1	1	1	1	1	1	1	1	1	12	1	1	1	1	1	1	2	1	1	1	1	1	1	1	1	1	1
1653	460	3694017	155152634	155152634_ 460	9	11	14	1	1	1	17	1	1	1	5	5	16	9	10	2	4	4	8	1	13	4	5	11	4	9	1	1	1	1	1	1	9	6	1	5	17	12	15
1654	470	3770967	155154724	155154724_ 470	61	64	64	30	38	27	78	53	63	43	53	31	75	62	50	33	31	33	74	59	81	33	41	41	35	55	45	43	41	14	52	56	50	42	30	49	70	64	61
1655	487	3911367	155154129	155154129_ 487	21	22	22	2	9	8	27	21	19	12	15	13	29	25	19	13	10	15	23	22	31	10	13	15	10	16	14	6	14	6	9	16	14	17	10	14	17	22	21
1656	596	4779083	155164658	155164658_ 596	5	1	4	2	1	1	1	3	1	3	3	2	5	4	4	1	1	1	1	3	6	1	1	1	1	1	4	1	1	1	1	2	4	3	1	1	1	3	1
1657	1448	11615417	155161057	155161057_1448	1	1	1	1	1	1	1	1	1	1	3	1	1	1	1	1	1	1	1	1	1	1	1	1	1	1	1	2	1	1	1	1	1	1	1	2	1	1	1
1658	1606	12879383	155962448	155962448_1606	1	1	1	1	1	1	1	1	1	1	1	2	1	4	1	1	1	1	1	1	1	1	1	2	1	3	1	1	1	6	1	1	3	2	1	1	1	1	1
1659	1585	12708200	155977631	155977631_1585	1	1	3	1	7	3	4	7	5	7	3	4	5	2	6	2	1	1	5	4	3	5	2	5	3	4	1	6	1	1	5	1	4	3	6	1	2	1	4
1660	1639	13143017	155989029	155989029_1639	5	1	3	1	8	5	8	5	10	5	5	8	8	1	7	4	1	4	3	2	6	4	4	4	1	2	4	5	4	4	2	3	3	3	4	1	2	5	4
1661	1615	12948733	155999268	155999268_1615	1	1	2	1	6	4	1	1	8	8	1	5	1	1	1	1	1	1	2	2	1	3	3	1	2	1	1	1	1	1	1	5	1	1	1	3	1	1	2
1662	1291	10358867	156032639	156032639_1291	1	1	1	1	1	1	1	1	1	1	1	1	1	1	1	1	1	1	1	1	1	1	1	1	1	1	1	2	1	1	1	2	2	1	1	1	1	1	1
1663	1555	12467750	156043472	156043472_1555	13	10	10	10	7	12	11	11	11	8	8	12	11	10	14	12	6	13	9	13	1	8	6	9	1	8	11	10	9	9	14	12	12	13	11	13	6	10	14
1664	1563	12538917	156047379	156047379_1563	1	1	1	1	1	1	1	1	1	1	1	1	1	1	1	3	2	1	1	1	1	1	1	4	1	1	1	2	1	1	1	3	1	5	2	1	1	1	1
1665	624	5004233	156049637	156049637_ 624	2	1	1	1	1	1	6	3	4	1	3	2	1	1	1	4	7	8	1	1	1	1	5	12	1	1	1	7	12	3	1	1	1	6	10	6	1	1	1
1666	666	5346617	156051605	156051605_ 666	1	1	1	1	1	1	2	1	2	1	1	1	1	1	1	2	1	5	1	1	1	1	1	9	1	1	1	3	11	3	1	1	1	1	8	1	1	1	1
1667	545	4376867	156064117	156064117_ 545	2	1	1	1	1	1	1	1	1	1	7	1	1	1	1	1	5	1	1	1	3	1	1	1	1	1	1	1	1	2	1	3	1	1	1	1	1	1	1
1668	627	5027317	156068695	156068695_ 627	1	1	2	1	1	1	1	1	2	1	4	1	1	1	1	1	1	1	1	1	1	1	1	2	1	1	1	1	1	1	1	1	1	1	1	1	1	1	1
1669	751	6029567	156071442	156071442_ 751	1	1	1	1	1	1	1	1	1	1	1	1	1	1	1	1	1	2	1	1	1	1	1	2	1	1	1	1	1	1	1	1	1	1	2	1	1	1	1
1670	534	4282633	156084366	156084366_ 534	1	3	6	1	1	1	6	2	5	1	3	1	6	7	4	5	4	3	10	8	9	4	4	5	3	7	7	1	5	1	2	3	4	6	2	1	3	1	4
1671	566	4538550	156086365	156086365_ 566	1	1	1	1	1	1	1	1	3	1	1	1	5	1	1	1	1	1	3	1	1	1	1	1	1	1	1	1	1	1	1	1	3	1	1	1	1	1	1
1672	379	3041750	156093124	156093124_ 379	1	3	1	1	1	1	1	1	2	1	1	1	1	1	1	1	1	1	1	1	1	1	1	3	1	1	1	1	1	1	1	2	1	4	2	4	4	1	1
1673	480	3847917	156100327	156100327_ 480	1	1	1	1	1	1	1	1	1	1	1	2	1	1	1	1	1	1	1	1	1	1	1	1	1	1	1	3	4	1	1	1	1	1	1	1	1	1	1
1674	535	4290317	156094284	156094284_ 535	1	1	1	1	1	1	1	1	1	1	3	1	1	1	1	1	1	1	1	1	6	1	5	3	1	1	1	1	5	1	1	2	1	1	4	1	1	1	1
1675	1419	11382584	156102692	156102692_1419	15	13	10	7	8	5	7	8	5	17	24	17	27	2	14	11	16	14	10	15	27	10	14	18	1	19	14	14	14	10	10	14	12	20	8	10	3	13	14
1676	1509	12104200	156102081	156102081_1509	6	6	7	1	4	3	6	5	1	6	7	7	13	1	9	4	5	9	8	1	17	1	6	8	1	9	7	7	12	6	6	1	1	10	8	8	1	8	6
1677	405	3251433	156119003	156119003_ 405	9	6	6	1	7	1	12	1	5	5	1	1	8	1	1	7	7	5	6	5	10	1	6	9	1	4	2	1	8	1	1	1	1	6	4	1	1	1	1
1678	754	6052650	156112930	156112930_ 754	1	1	1	3	3	1	1	1	1	1	1	1	1	1	1	2	1	2	1	1	1	1	3	1	1	1	1	1	2	1	1	1	1	1	1	1	1	1	1
1679	405	3251433	156126984	156126984_ 405	1	1	1	5	1	4	1	1	1	1	1	1	1	1	1	1	1	1	1	1	1	1	1	1	2	1	1	6	1	1	1	1	1	1	1	1	2	1	1
1680	555	4453917	156137909	156137909_ 555	50	54	59	14	18	10	3	1	1	59	81	53	8	1	7	158	116	126	20	9	32	131	152	217	13	20	25	194	212	149	31	32	25	209	112	169	43	30	35
1681	576	4625100	156137375	156137375_ 576	1	1	1	1	1	1	1	1	1	1	1	1	1	1	1	1	1	2	1	1	1	1	1	1	1	1	1	1	1	1	1	2	1	3	1	1	1	1	1
1682	1032	8278950	156138718	156138718_1032	6	1	1	1	3	3	1	1	1	4	6	3	4	2	1	1	1	3	6	3	1	7	1	4	1	2	1	2	5	1	1	1	1	1	1	3	1	1	1
1683	1221	9791250	156137238	156137238_1221	5	21	21	1	1	1	1	1	1	1	1	1	1	1	1	1	1	1	1	1	1	82	1	1	1	1	1	1	1	1	1	1	1	1	1	1	1	1	1
1684	1233	9893184	156138367	156138367_1233	5	3	7	1	1	1	1	1	1	1	1	1	1	1	1	1	1	1	1	1	1	43	1	1	1	1	1	1	1	1	1	1	1	1	1	1	1	1	1
1685	1289	10333883	156138474	156138474_1289	129	136	130	15	2	1	3	11	29	3	1	6	1	1	1	1	3	1	6	1	8	158	6	1	1	2	1	5	29	1	15	1	1	1	1	1	12	5	5
1686	1335	10707133	156137390	156137390_1335	2	9	1	1	1	1	1	13	12	1	1	1	1	1	4	1	1	1	1	1	1	11	1	1	1	1	1	1	31	1	1	1	1	1	1	1	3	1	1
1687	1390	11149734	156137985	156137985_1390	6	6	9	22	1	1	1	10	29	1	1	1	1	1	9	1	1	1	1	1	1	14	1	1	1	1	1	1	35	1	26	1	1	1	1	1	20	1	1
1688	1480	11871350	156138260	156138260_1480	4	15	1	10	1	1	1	13	9	1	1	1	1	1	16	1	1	1	1	1	1	1	1	1	1	2	1	1	9	1	5	1	1	1	1	1	11	1	1
1689	1468	11769417	156137848	156137848_1468	15	19	11	16	14	7	19	17	18	14	16	19	20	4	21	13	9	1	8	15	11	1	1	1	2	19	6	1	9	8	18	1	5	1	1	13	14	10	15
1690	1207	9683416	156142303	156142303_1207	20	20	23	4	1	1	1	1	8	1	1	1	1	1	1	1	1	1	1	1	1	107	1	1	1	1	1	1	8	1	1	3	1	1	1	1	3	1	1
1691	468	3755567	156155319	156155319_ 468	7	7	6	4	1	1	1	4	5	3	1	1	5	5	6	1	3	3	4	7	6	2	4	1	1	6	1	3	4	3	4	6	6	3	1	1	6	6	5
1692	1298	10412733	156147263	156147263_1298	1	4	1	1	1	1	3	3	18	1	1	1	1	1	1	7	1	1	1	1	1	1	1	1	1	1	1	1	11	1	1	1	1	1	3	1	5	1	1
1693	1470	11784800	156142365	156142365_1470	1	1	1	1	1	1	1	1	1	1	1	1	1	1	1	1	1	9	1	1	1	1	1	1	1	1	1	1	1	1	1	7	4	1	1	1	1	1	1
1694	800	6416217	156979385	156979385_ 800	1	1	1	1	2	1	1	1	1	1	2	1	1	1	1	1	2	1	1	1	1	1	1	1	1	1	1	1	1	1	1	1	1	1	1	1	1	1	1
1695	1566	12562000	156988235	156988235_1566	1	1	1	1	1	1	1	1	2	4	3	1	3	4	3	1	4	1	1	1	1	1	1	1	1	5	2	1	5	1	1	1	2	1	1	5	1	1	1
1696	1575	12631250	156989212	156989212_1575	1	4	3	14	11	9	15	12	10	16	11	11	10	13	12	1	14	1	11	2	13	4	4	9	10	11	6	4	10	1	7	1	13	4	7	5	5	1	3
1697	1582	12685117	156990494	156990494_1582	11	9	9	22	18	15	20	15	18	18	16	18	17	17	13	1	20	1	16	13	17	14	14	12	13	15	14	12	12	9	12	1	13	7	12	12	10	14	14
1698	1633	13096833	156988495	156988495_1633	2	6	1	5	4	3	12	1	7	11	5	6	5	9	5	1	8	1	1	2	3	1	1	4	4	6	4	1	9	1	3	1	5	1	3	6	3	1	1
1699	1644	13181483	156988174	156988174_1644	2	3	1	3	4	1	3	1	3	3	4	3	1	2	4	1	1	1	1	1	2	1	1	1	2	4	4	1	5	1	2	1	4	1	2	4	2	1	1
1700	1638	13135317	156986954	156986954_1638	1	1	1	2	1	1	4	2	1	1	1	1	1	1	3	1	3	1	1	1	1	1	1	1	1	2	3	1	1	1	2	1	3	1	1	3	1	1	1
1701	908	7286117	156994385	156994385_ 908	1	1	1	1	1	1	1	2	1	2	1	1	1	1	1	1	1	1	1	2	1	1	1	1	1	1	2	1	1	1	1	1	1	1	1	1	1	1	1
1702	1067	8557867	156995178	156995178_1067	1	1	1	2	2	1	3	1	1	1	2	1	1	1	1	1	2	1	1	1	3	1	1	1	1	1	1	1	2	1	2	1	1	1	1	1	2	1	1
1703	1184	9496850	157006744	157006744_1184	4	2	3	1	5	1	9	4	4	1	4	4	3	3	3	1	3	1	6	1	3	4	1	1	2	5	2	1	1	1	1	1	1	3	4	1	1	1	1
1704	1581	12677417	156999054	156999054_1581	1	2	1	5	11	14	1	1	2	1	1	11	13	1	1	1	1	1	1	1	1	5	3	1	2	1	4	1	1	8	4	1	2	1	1	8	1	1	1
1705	489	3926767	157050674	157050674_ 489	1	1	1	2	1	1	1	1	1	1	1	3	1	1	1	1	2	1	1	1	1	1	3	1	1	1	1	1	1	1	1	1	1	3	1	1	1	1	1
1706	514	4128733	157076370	157076370_ 514	15	10	12	7	7	5	8	10	12	6	11	5	18	9	1	6	5	6	14	12	21	8	11	12	4	12	12	10	12	8	12	2	12	15	10	5	5	15	15
1707	562	4507767	157074814	157074814_ 562	1	1	1	1	1	1	1	4	3	1	9	1	1	1	1	1	4	3	1	4	3	1	1	1	1	1	1	3	1	5	1	1	1	1	5	1	1	1	1
1708	667	5354317	157079056	157079056_ 667	1	2	3	7	8	1	4	3	1	1	9	1	1	1	1	6	8	6	1	1	4	5	8	11	1	2	1	6	16	4	1	1	1	10	9	6	1	1	1
1709	766	6144983	157080536	157080536_ 766	3	1	1	1	11	1	1	1	1	1	5	3	1	1	1	3	1	15	3	1	1	1	1	6	1	1	1	6	1	4	1	1	1	8	1	5	1	1	1
1710	757	6075733	157085678	157085678_ 757	2	3	5	17	11	12	1	1	1	13	20	10	1	3	1	8	11	15	3	2	1	10	5	6	1	1	1	6	7	1	1	1	1	8	1	5	1	1	1
1711	824	6610683	157084427	157084427_ 824	1	1	1	14	13	8	1	1	1	7	9	5	1	1	1	8	7	7	1	1	1	5	7	11	1	1	1	8	9	6	1	1	1	6	4	6	1	1	1
1712	222	1785383	157094727	157094727_ 222	6	1	5	1	1	1	8	4	6	1	6	1	7	5	4	2	1	1	1	4	5	1	1	1	1	1	4	1	3	1	1	2	2	1	1	1	1	1	5
1713	432	3468950	157097427	157097427_ 432	10	12	12	5	5	1	20	11	11	3	8	4	20	8	10	2	6	5	1	8	3	1	5	9	6	10	9	5	8	5	9	11	12	8	1	1	13	10	10
1714	454	3647833	157093872	157093872_ 454	1	1	3	2	1	1	5	3	2	1	4	4	1	1	1	2	1	5	1	1	1	1	1	3	1	1	1	1	3	1	1	3	1	1	1	1	1	1	1
1715	863	6920367	157101852	157101852_ 863	2	1	1	1	4	1	1	1	1	1	4	2	3	1	1	1	1	1	1	1	3	1	1	1	1	1	1	3	1	1	1	1	1	1	1	1	1	1	1
1716	555	4453917	157113113	157113113_ 555	1	1	1	1	1	1	2	3	1	1	1	1	1	1	2	1	1	13	1	1	1	1	1	1	1	1	1	1	1	1	2	2	1	1	1	1	1	1	2
1717	1137	9115800	157123672	157123672_1137	38	41	37	1	1	1	1	1	1	9	8	17	25	24	22	1	1	1	1	1	1	1	1	1	1	1	1	1	1	1	1	1	1	1	1	1	1	1	1
1718	1272	10203067	157125427	157125427_1272	65	58	62	2	1	2	4	1	3	14	23	39	14	12	15	1	1	1	1	1	1	19	1	3	1	1	1	1	4	1	2	1	1	1	1	1	1	1	1
1719	421	3384317	157133179	157133179_ 421	20	17	19	13	8	7	40	22	21	11	14	7	37	22	19	10	9	10	28	22	30	7	11	13	13	17	17	13	14	10	21	28	17	1	7	12	24	21	18
1720	480	3847917	157134308	157134308_ 480	6	8	7	3	1	1	16	10	9	3	4	1	11	13	8	6	1	8	11	8	13	5	4	6	7	7	4	4	7	5	7	7	6	3	1	6	13	3	9
1721	480	3847917	157133575	157133575_ 480	1	6	1	3	1	1	6	2	3	1	1	1	1	1	3	1	1	3	1	1	1	3	5	4	1	1	1	4	7	1	1	1	1	1	1	1	3	1	1
1722	554	4446217	157141983	157141983_ 554	4	6	1	2	1	1	1	1	1	6	8	1	1	1	1	14	9	1	1	1	1	13	16	23	1	1	1	19	16	15	1	1	1	22	14	15	1	1	1
1723	1174	9419900	157145996	157145996_1174	3	3	1	1	1	1	1	1	1	1	1	1	1	1	1	1	1	1	1	1	1	11	1	1	1	1	1	1	1	1	1	1	1	1	1	1	1	1	1
1724	1391	11157434	157142487	157142487_1391	1	2	1	2	1	1	1	1	3	1	1	1	1	1	1	1	1	1	1	1	1	2	1	1	1	1	1	1	1	1	1	1	1	1	1	1	3	1	1
1725	1582	12685117	157992203	157992203_1582	1	2	1	1	3	2	1	4	2	2	3	2	2	3	2	1	3	1	1	1	2	3	1	2	2	1	2	2	1	1	1	2	2	1	1	2	2	2	1
1726	1609	12902467	158006912	158006912_1609	1	1	1	1	1	1	1	1	1	2	1	1	1	1	1	1	1	1	2	2	1	1	1	1	1	1	1	1	2	1	2	1	2	1	2	1	2	1	1
1727	1623	13019883	158008118	158008118_1623	1	1	1	1	1	1	1	2	1	1	1	1	1	1	2	1	1	1	1	2	1	1	1	1	1	1	1	1	1	2	1	1	2	1	1	1	1	2	1
1728	102	823133	158045593	158045593_ 102	1	1	4	1	1	1	1	1	1	2	1	1	1	1	1	1	1	1	1	1	1	1	1	1	1	1	1	1	4	1	1	1	1	1	1	1	1	1	1
1729	513	4121033	158060822	158060822_ 513	49	48	48	39	49	28	72	38	46	35	51	25	47	38	38	38	42	46	61	42	62	37	59	58	23	46	37	56	61	44	40	47	39	65	48	46	57	47	55
1730	652	5229300	158058365	158058365_ 652	1	1	2	2	5	1	2	3	2	2	1	1	1	1	1	3	3	3	2	1	3	6	4	1	1	3	1	2	7	6	4	2	1	12	1	7	6	5	1
1731	406	3259200	158063965	158063965_ 406	1	3	2	1	1	1	5	1	1	1	6	1	1	1	1	1	7	7	1	1	1	1	10	12	1	1	1	5	17	5	1	1	1	5	9	11	1	1	1
1732	535	4290317	158062454	158062454_ 535	1	1	1	1	1	1	9	1	1	1	1	1	1	1	1	2	1	3	1	1	1	4	1	4	1	3	1	1	9	5	1	4	1	1	8	4	4	3	3
1733	551	4423133	158064392	158064392_ 551	11	10	10	7	7	1	14	5	7	3	2	2	32	15	24	1	1	9	13	12	8	7	7	12	8	28	25	18	15	13	24	33	19	17	5	12	33	34	36
1734	576	4625100	158063293	158063293_ 576	1	4	3	1	1	1	7	3	2	1	1	1	3	1	1	1	1	3	1	1	1	4	4	14	4	7	4	13	14	3	1	6	5	16	11	3	8	1	11
1735	408	3274583	158085938	158085938_ 408	1	1	1	1	1	1	4	5	1	1	1	1	1	1	1	1	1	1	1	3	4	1	1	1	1	1	1	1	1	1	1	1	3	1	1	1	1	1	1
1736	422	3392017	158130936	158130936_ 422	1	1	1	1	1	1	1	1	1	1	1	1	3	2	1	1	1	1	2	1	1	1	1	1	1	1	1	1	1	1	1	1	1	1	1	1	1	1	1
1737	1448	11615417	158120544	158120544_1448	3	1	1	1	1	1	1	1	1	1	1	1	1	1	3	3	1	2	1	1	1	1	1	1	1	1	1	1	1	1	1	1	1	1	1	4	1	4	1
1738	109	877000	158155334	158155334_ 109	5	6	1	1	1	1	3	1	1	1	3	6	1	1	1	2	5	2	1	1	4	1	4	3	2	1	3	1	1	1	3	3	1	2	1	1	1	4	1
1739	797	6393133	158154999	158154999_ 797	1	1	1	2	1	1	1	1	1	3	2	4	1	1	1	3	3	3	4	1	1	1	1	5	1	1	1	4	1	1	1	1	1	3	1	1	1	1	1
1740	1555	12467750	158965561	158965561_1555	127	126	94	90	115	113	111	115	123	103	87	95	107	118	117	95	91	109	105	117	112	91	76	95	110	124	114	121	109	126	123	125	129	125	132	120	128	125	137
1741	96	776967	158967743	158967743_ 96	12	13	1	1	3	1	2	4	1	1	25	1	5	1	1	1	1	1	1	1	1	1	1	2	1	1	1	1	13	1	1	1	1	1	1	1	1	1	1
1742	1576	12638950	158987442	158987442_1576	1	4	2	4	6	6	7	9	9	1	2	5	1	7	7	1	5	1	5	7	5	5	4	1	4	4	5	5	5	1	3	1	1	3	1	1	6	5	5
1743	1591	12763967	158986115	158986115_1591	1	1	1	1	2	6	1	3	1	1	1	1	1	1	2	1	1	1	1	1	1	1	1	1	1	1	1	1	2	1	1	1	1	1	1	1	1	1	1
1744	379	3041750	158999710	158999710_ 379	1	1	2	1	1	1	1	2	2	1	1	1	1	1	2	1	1	1	1	1	1	1	1	1	1	1	1	1	1	1	1	1	1	1	1	1	2	1	1
1745	512	4113333	159063812	159063812_ 512	9	8	6	1	6	1	1	4	1	3	6	5	7	4	1	1	4	5	10	5	10	4	6	5	4	6	5	7	9	2	6	6	5	1	5	5	1	1	6
1746	663	5323534	159060516	159060516_ 663	14	10	14	1	1	1	1	1	1	1	1	1	1	1	1	1	1	1	1	1	1	1	1	1	1	1	1	1	1	1	1	1	1	1	1	2	1	1	1
1747	1303	10451217	159061676	159061676_1303	1	1	1	1	1	1	1	1	1	1	1	1	1	1	1	2	4	4	1	1	1	1	5	8	1	1	1	4	1	1	2	1	1	1	1	1	1	1	1
1748	1353	10855333	159065491	159065491_1353	359	352	337	18	20	13	17	14	18	90	115	106	114	31	71	19	18	20	18	14	15	25	14	17	17	16	15	13	17	14	14	16	14	13	17	4	17	14	17
1749	1408	11288250	159064774	159064774_1408	3	1	3	1	1	1	1	1	2	5	1	8	1	1	1	3	1	1	1	1	1	2	1	1	1	3	1	1	1	1	1	1	1	2	1	1	1	1	1
1750	355	2847383	159071030	159071030_ 355	1	1	2	1	1	1	1	1	1	1	1	1	1	1	1	1	1	1	1	2	1	1	1	1	1	1	1	1	1	1	1	2	1	1	1	1	1	1	1
1751	463	3717100	159070999	159070999_ 463	1	1	1	1	1	1	1	1	1	1	4	1	1	1	1	1	1	1	2	1	1	1	1	1	1	1	1	1	2	1	1	2	1	1	1	1	1	1	1
1752	592	4748317	159086243	159086243_ 592	4	1	1	1	1	1	1	2	2	1	1	1	4	1	1	2	1	1	2	1	1	1	1	1	1	1	2	1	2	1	1	1	1	1	1	1	1	1	4
1753	706	5664017	159080566	159080566_ 706	15	14	16	13	22	9	21	14	12	16	24	20	25	14	1	12	11	14	13	11	18	15	15	17	1	20	13	10	15	9	8	8	7	10	8	1	5	9	6
1754	365	2933917	159090454	159090454_ 365	1	1	3	1	1	1	8	6	1	1	1	1	4	2	3	1	1	2	5	1	1	1	1	1	1	1	1	3	3	1	4	3	1	1	1	1	1	1	5
1755	457	3670933	159091309	159091309_ 457	3	4	3	1	1	1	9	3	4	1	1	1	5	1	3	1	1	2	6	1	4	1	1	1	1	1	1	1	3	1	1	2	1	4	1	1	1	1	1
1756	448	3592083	159089233	159089233_ 448	1	2	1	1	1	1	3	1	2	1	1	1	1	1	1	1	1	1	2	1	1	1	1	1	1	1	1	1	1	1	1	3	1	1	1	1	1	1	1
1757	516	4144117	159088623	159088623_ 516	4	1	1	1	1	1	1	4	1	1	1	1	1	1	1	1	1	1	1	1	1	1	1	1	1	4	1	1	1	1	2	1	1	1	1	1	1	1	1
1758	531	4259533	159091888	159091888_ 531	7	8	11	7	5	5	16	7	9	5	1	1	11	10	7	9	4	6	9	1	13	3	6	7	4	9	9	3	6	3	8	3	9	5	4	6	6	12	8
1759	1307	10482083	159086731	159086731_1307	1	1	1	1	3	1	1	1	1	1	1	1	6	1	1	1	2	1	2	1	2	1	1	1	1	1	1	1	1	3	1	1	1	1	1	1	2	1	3
1760	688	5515900	159116257	159116257_ 688	1	4	1	5	1	2	1	1	1	1	1	1	1	1	1	7	6	6	1	1	1	6	1	8	1	1	1	12	10	5	1	1	1	20	9	10	4	1	1
1761	828	6641450	159116745	159116745_ 828	1	1	1	2	1	1	1	1	1	1	1	1	1	1	1	1	1	2	1	1	1	4	4	9	1	1	1	12	14	11	1	1	1	20	9	24	1	1	1
1762	872	6999317	159116745	159116745_ 872	1	3	1	1	1	1	1	1	1	1	1	1	1	1	1	1	1	1	1	1	1	1	1	1	1	1	1	1	1	1	1	1	1	3	1	2	1	1	1
1763	1043	8363600	159114487	159114487_1043	9	1	6	1	1	1	1	1	1	1	1	1	1	1	1	2	3	4	1	1	1	1	4	6	1	1	1	1	4	3	1	1	1	1	1	5	1	1	1
1764	1554	12460067	159967773	159967773_1554	4	4	1	1	1	1	1	1	1	1	1	1	1	1	1	1	1	1	1	1	1	1	2	1	1	1	1	1	1	1	1	1	4	1	1	1	1	1	1
1765	1633	13096833	159969330	159969330_1633	1	1	1	1	1	2	2	2	1	1	2	1	1	1	1	1	1	1	1	1	1	1	1	1	1	1	1	1	1	1	1	1	1	1	1	1	1	1	1
1766	1611	12917867	159968811	159968811_1611	1	1	1	1	1	2	3	2	3	2	2	2	1	2	1	1	1	1	1	1	1	1	1	1	1	1	1	1	1	1	1	1	1	1	1	1	1	2	1
1767	141	1133117	160047043	160047043_ 141	1	4	1	1	1	1	3	1	5	1	1	1	1	1	1	1	1	1	1	1	1	1	1	3	1	1	1	1	5	1	1	3	2	1	1	1	3	4	1
1768	151	1219667	160070724	160070724_ 151	1	1	1	1	3	1	1	1	1	1	1	1	2	1	1	4	1	1	1	1	1	1	1	1	1	1	1	1	1	1	1	1	1	1	1	1	1	1	1
1769	207	1660167	160075439	160075439_ 207	46	53	49	18	48	19	51	40	35	33	81	19	32	20	19	47	46	39	35	32	63	29	55	76	12	27	30	48	83	24	20	19	16	44	43	35	35	37	35
1770	213	1716033	160075043	160075043_ 213	1	1	1	11	1	1	1	2	1	1	1	1	1	1	1	2	1	1	1	1	1	1	1	1	1	1	11	1	2	1	15	1	1	1	1	30	1	27	1
1771	358	2870467	160074829	160074829_ 358	1	1	1	3	11	2	1	1	2	1	4	3	3	2	1	1	4	3	1	1	1	2	1	1	1	3	1	1	4	1	1	2	1	1	1	3	1	3	2
1772	467	3747883	160076340	160076340_ 467	22	22	18	35	42	21	67	36	37	37	62	24	41	32	30	17	13	15	30	19	21	15	23	24	13	24	17	17	34	15	17	14	19	25	19	20	31	29	34
1773	1047	8394383	160071991	160071991_1047	1	1	1	2	1	1	1	1	1	1	1	1	1	1	1	4	1	3	1	1	1	2	1	1	1	1	1	1	1	1	1	1	1	1	1	1	1	1	1
1774	1352	10847633	160068375	160068375_1352	30	31	28	1	1	1	1	1	1	6	11	6	9	1	5	1	1	1	1	1	1	1	1	1	1	1	1	1	1	1	1	1	1	1	1	1	1	1	1
1775	446	3576683	160076233	160076233_ 446	26	21	27	9	11	6	29	12	18	19	21	10	24	21	17	26	15	19	27	20	37	6	7	1	1	8	1	1	1	1	6	27	8	8	6	3	9	13	13
1776	456	3663233	160076828	160076828_ 456	10	11	11	1	4	1	11	1	7	11	15	6	11	5	6	8	5	1	10	2	9	3	1	1	1	5	1	1	1	1	1	1	2	1	1	4	1	1	2
1777	538	4313400	160082016	160082016_ 538	1	1	1	1	1	1	1	1	3	1	1	1	1	1	1	4	1	1	1	1	4	1	1	1	1	1	1	1	1	1	1	1	1	1	1	1	1	1	1
1778	564	4523167	160078766	160078766_ 564	6	13	12	2	1	1	7	3	4	1	1	1	15	8	8	13	1	8	18	11	29	17	14	22	11	4	17	25	20	16	6	23	15	27	8	12	12	18	19
1779	531	4259533	160078064	160078064_ 531	2	5	6	1	1	1	8	2	3	1	1	1	5	4	1	11	1	1	6	2	7	2	1	1	1	1	1	4	1	1	1	6	2	1	1	4	1	4	4
1780	593	4756000	160075684	160075684_ 593	2	1	1	1	1	1	1	1	1	1	1	1	1	1	1	2	1	1	1	1	1	1	1	1	1	1	1	1	1	1	1	1	2	1	1	1	1	1	1
1781	671	5385083	160080185	160080185_ 671	1	1	1	1	4	1	1	1	1	3	1	1	1	1	1	3	4	2	1	1	1	2	1	1	1	1	4	3	4	1	1	4	1	4	1	1	1	1	1
1782	775	6214250	160080734	160080734_ 775	1	1	1	3	2	1	1	1	1	1	1	1	1	1	1	2	1	3	1	1	1	4	1	1	1	1	1	3	4	1	1	1	1	4	1	1	1	1	2
1783	406	3259200	160106232	160106232_ 406	1	1	3	2	1	1	5	3	3	1	3	1	4	1	1	1	1	1	4	1	1	1	1	1	1	1	1	1	1	1	3	3	1	1	1	1	1	1	3
1784	782	6277700	160117310	160117310_ 782	1	1	1	1	1	1	1	1	1	1	6	1	1	1	1	1	7	3	1	1	1	5	1	8	1	1	1	6	1	1	1	1	1	1	1	5	1	1	1
1785	1577	12646633	160985458	160985458_1577	5	7	5	8	4	4	1	2	3	1	5	2	4	1	4	4	1	5	6	1	1	1	1	1	1	1	4	5	4	6	1	1	1	3	2	1	1	1	1
1786	1583	12692817	160990982	160990982_1583	1	1	1	2	2	1	1	1	5	1	1	1	1	1	1	1	1	1	1	1	1	1	1	1	1	1	1	1	1	1	1	1	1	1	1	1	1	1	1
1787	369	2964800	161045044	161045044_ 369	1	1	1	1	1	1	1	1	1	1	1	1	1	1	1	1	1	1	1	1	3	1	1	1	1	14	1	4	1	1	1	1	1	1	1	1	1	1	1
1788	748	5996883	161067154	161067154_ 748	1	1	2	1	1	1	1	1	1	1	8	1	1	1	1	1	1	4	1	1	1	2	1	1	1	1	1	3	6	1	1	1	1	5	1	2	3	3	1
1789	1261	10118433	161060852	161060852_1261	10	8	7	12	7	7	1	11	1	4	4	13	5	6	6	5	1	7	4	2	4	1	5	1	3	5	1	1	5	11	4	7	7	5	8	4	15	5	8
1790	318	2553067	161070969	161070969_ 318	1	1	1	1	1	1	1	1	1	1	1	1	1	1	1	1	1	1	1	1	1	1	1	1	1	1	1	1	3	1	1	1	1	5	3	3	1	1	1
1791	372	2987883	161070374	161070374_ 372	39	43	38	1	1	1	4	3	6	28	56	30	12	8	12	11	19	31	22	13	32	63	94	132	16	1	55	100	143	135	25	33	58	108	109	156	35	29	55
1792	383	3072533	161072037	161072037_ 383	4	1	2	1	1	1	1	1	1	1	1	1	1	1	1	2	1	1	1	1	1	2	2	4	1	1	1	2	2	1	1	6	2	1	3	2	1	5	2
1793	449	3599767	161072327	161072327_ 449	8	8	4	2	3	3	1	1	1	3	6	1	6	6	6	4	1	6	10	8	25	7	6	2	1	1	12	10	8	6	4	8	31	12	7	10	7	7	34
1794	466	3740183	161071564	161071564_ 466	28	27	21	17	17	11	64	44	42	16	34	9	34	20	24	19	15	23	32	24	37	10	16	24	13	14	20	13	19	7	13	19	24	14	11	11	18	13	22
1795	514	4128733	161070740	161070740_ 514	4	1	7	1	1	1	23	11	13	3	1	1	4	1	2	1	2	1	1	3	15	1	2	1	1	2	20	1	1	1	5	8	13	2	1	1	9	4	16
1796	627	5027317	161069977	161069977_ 627	4	2	2	1	4	1	1	3	3	2	1	1	1	1	1	4	5	3	3	1	4	4	7	9	1	1	1	5	10	3	1	2	1	1	7	8	1	1	1
1797	678	5438950	161071808	161071808_ 678	2	1	1	1	1	1	1	3	1	1	1	1	1	1	1	1	7	2	1	1	1	1	6	1	1	1	1	6	9	4	1	1	1	1	6	5	1	1	1
1798	828	6641450	161070129	161070129_ 828	1	2	2	1	1	1	1	1	1	1	19	4	1	1	1	2	1	3	1	1	1	1	2	1	1	1	1	4	1	1	1	2	1	6	6	8	6	4	5
1799	210	1683350	161080444	161080444_ 210	1	3	6	1	1	1	1	5	2	2	8	1	1	1	2	5	4	3	4	1	5	1	9	9	1	3	2	4	12	1	1	2	1	1	4	4	1	1	5
1800	559	4484684	161077911	161077911_ 559	1	1	3	1	1	1	1	1	1	3	1	1	1	1	1	2	1	1	1	1	3	3	1	1	1	3	1	1	1	1	1	1	1	1	1	1	1	1	1
1801	882	7076367	161083298	161083298_ 882	1	1	1	1	1	1	1	1	1	2	17	1	1	1	1	2	1	5	1	1	1	2	1	1	1	1	1	1	1	1	1	1	1	3	1	1	1	2	1
1802	624	5004233	161089951	161089951_ 624	1	1	1	1	1	1	1	1	1	1	1	1	1	1	1	1	1	2	1	1	3	1	1	1	1	1	1	1	1	1	1	1	1	1	5	1	1	1	1
1803	667	5354317	161089096	161089096_ 667	1	1	1	1	1	1	3	1	1	1	1	1	1	1	1	2	1	4	1	1	1	1	3	1	1	1	1	1	1	1	1	1	1	1	6	1	1	1	1
1804	389	3118700	161099197	161099197_ 389	1	1	1	1	1	1	1	1	1	1	1	1	1	1	1	1	1	1	1	1	1	1	1	1	1	1	1	1	2	1	1	1	1	1	1	1	4	1	2
1805	461	3701700	161104034	161104034_ 461	13	10	13	1	1	1	4	1	1	1	1	1	4	1	1	2	1	1	1	1	6	2	3	2	1	1	1	1	1	1	2	1	7	1	1	1	1	5	1
1806	477	3824817	161098053	161098053_ 477	1	1	1	2	1	2	1	1	1	1	1	1	1	1	1	1	1	1	1	1	2	1	1	1	1	1	1	1	1	1	1	1	1	1	1	1	1	1	1
1807	879	7053184	161103989	161103989_ 879	2	1	3	1	1	1	12	1	1	1	1	1	1	1	1	1	1	2	1	2	3	1	2	7	1	1	1	3	1	1	1	1	1	1	1	1	1	1	1
1808	563	4515467	161135178	161135178_ 563	1	1	1	1	1	1	1	1	1	1	1	1	1	1	1	1	1	1	1	1	1	1	3	5	1	1	1	2	2	1	1	1	1	3	1	1	1	2	1
1809	657	5267766	161132584	161132584_ 657	1	1	1	1	1	1	1	1	1	1	1	1	1	1	1	3	1	3	1	1	1	1	1	2	1	1	1	3	1	1	1	1	1	1	1	1	1	2	1
1810	687	5508217	161130951	161130951_ 687	1	3	1	1	1	1	1	1	1	1	1	1	1	1	1	6	2	2	4	1	1	1	2	4	1	1	1	4	7	1	1	1	2	7	4	5	3	1	1
1811	701	5625533	161129913	161129913_ 701	1	1	1	1	1	1	1	1	1	1	1	1	1	1	1	3	1	2	1	1	1	1	1	1	1	1	1	1	1	1	1	1	1	3	1	1	1	1	1
1812	746	5981500	161130920	161130920_ 746	1	1	1	2	1	1	1	1	1	1	2	1	1	1	1	2	1	3	1	1	1	1	1	4	1	1	1	3	1	2	1	1	1	5	1	1	1	3	1
1813	792	6354650	161130173	161130173_ 792	1	1	1	7	7	1	1	1	1	5	6	3	1	1	1	6	3	4	1	1	1	1	2	9	1	1	1	9	3	6	5	1	1	12	6	5	4	6	1
1814	893	7161000	161132172	161132172_ 893	5	1	1	1	1	1	1	1	1	1	1	1	1	1	1	10	4	3	1	1	1	1	1	5	1	1	1	5	5	1	2	2	1	4	1	1	2	2	1
1815	1045	8378983	161133804	161133804_1045	6	1	10	1	1	1	1	1	1	1	1	1	1	1	1	2	1	4	1	1	1	1	1	1	1	1	1	1	1	1	2	1	1	2	1	1	1	2	1
1816	1209	9698816	161133972	161133972_1209	33	33	30	3	1	1	1	1	4	1	1	6	13	14	9	2	1	1	1	1	1	107	1	1	1	1	1	1	1	1	3	2	1	1	1	2	1	1	1
1817	1221	9791250	161129745	161129745_1221	4	5	1	2	1	1	1	1	1	1	1	1	1	1	1	1	1	1	1	1	1	33	1	1	1	1	1	1	1	1	1	1	1	1	1	1	1	1	1
1818	1300	10428117	161132538	161132538_1300	1	1	1	7	1	1	1	3	11	1	1	1	1	1	1	3	2	1	2	1	1	4	1	1	1	1	1	1	19	1	9	1	1	1	1	1	8	2	1
1819	1310	10505167	161132111	161132111_1310	1	1	1	1	1	1	1	1	3	1	1	1	1	1	1	1	1	1	1	1	1	6	1	1	1	1	1	1	1	1	5	1	1	1	1	1	1	2	1
1820	1393	11172816	161134186	161134186_1393	1	1	1	8	1	1	1	4	15	1	1	1	1	1	4	3	1	1	1	1	1	1	1	1	1	1	1	1	15	1	12	1	1	1	1	1	1	2	1
1821	1542	12367717	162050049	162050049_1542	1	1	1	1	1	1	1	1	1	1	1	1	1	1	1	2	3	2	1	1	1	1	1	1	1	1	1	1	1	3	1	1	1	1	1	1	1	1	1
1822	489	3926767	162055969	162055969_ 489	1	1	1	1	1	1	1	1	1	1	5	1	1	1	1	2	1	2	1	1	1	1	2	6	1	1	1	1	7	1	1	1	1	4	5	1	1	1	1
1823	545	4376867	162057419	162057419_ 545	6	2	4	2	4	1	4	1	1	8	15	8	1	2	3	12	10	8	3	4	4	9	11	14	2	1	1	11	17	11	3	1	2	7	9	8	1	4	2
1824	559	4484684	162057587	162057587_ 559	3	3	2	2	1	1	2	1	1	1	3	1	1	1	1	7	5	5	1	1	1	6	8	8	1	1	1	1	12	4	1	1	1	5	4	1	1	1	1
1825	582	4671367	162059036	162059036_ 582	3	1	1	1	1	1	1	1	1	1	1	1	1	1	1	3	5	2	1	1	1	1	1	4	1	1	1	1	4	1	1	1	1	1	4	1	1	1	1
1826	731	5865983	162056992	162056992_ 731	1	1	1	1	1	1	1	1	1	1	1	1	1	1	1	2	1	1	1	1	1	1	4	1	1	1	1	4	1	1	1	1	1	3	1	3	1	1	1
1827	159	1281217	162066208	162066208_ 159	1	1	4	1	1	1	7	1	1	1	1	1	2	1	1	1	1	1	1	1	1	1	1	1	1	1	1	1	3	1	1	2	1	1	1	1	1	1	1
1828	440	3530517	162060349	162060349_ 440	3	8	7	2	5	1	6	1	6	4	7	1	2	1	1	8	8	10	12	1	2	6	12	16	1	1	3	14	20	9	1	2	1	7	7	10	2	2	1
1829	818	6564500	162061279	162061279_ 818	1	1	1	1	1	1	4	4	1	1	3	1	3	3	1	1	1	1	1	1	1	1	1	1	1	1	1	1	1	1	1	1	1	1	1	1	1	1	1
1830	374	3003267	162076447	162076447_ 374	1	2	11	1	1	1	1	1	1	6	14	5	1	1	1	11	1	12	1	1	10	14	17	27	4	1	13	23	24	25	6	3	10	21	21	29	6	4	7
1831	496	3980617	162077881	162077881_ 496	161	170	177	110	96	68	212	116	134	121	162	93	144	109	108	153	137	154	177	129	212	144	158	201	63	136	160	183	185	135	118	130	143	164	126	164	158	126	200
1832	1339	10737917	162073730	162073730_1339	1	1	1	1	1	1	1	1	1	1	1	1	4	1	1	1	2	2	1	1	1	2	1	1	1	1	1	1	1	1	1	1	1	1	1	1	1	1	1
1833	106	853917	162081757	162081757_ 106	1	1	1	1	1	1	1	1	1	1	2	1	1	1	1	1	1	1	1	1	2	1	1	1	1	1	1	1	3	1	1	2	1	1	3	1	1	1	1
1834	447	3584383	162087219	162087219_ 447	25	30	25	8	1	4	6	4	1	9	20	14	7	3	4	19	1	13	1	4	31	19	13	26	5	6	12	21	13	17	7	4	11	19	11	22	1	6	1
1835	509	4080650	162081635	162081635_ 509	1	4	2	1	1	1	1	1	1	1	4	6	4	1	1	1	1	1	3	1	4	1	1	1	1	1	1	2	1	1	1	2	1	1	1	2	1	1	1
1836	604	4850250	162084854	162084854_ 604	1	1	2	1	4	1	1	1	1	1	1	1	1	1	1	1	1	1	1	1	1	1	1	1	1	1	1	1	1	2	1	6	1	1	1	1	1	1	1
1837	162	1304300	162082809	162082809_ 162	1	1	1	2	1	1	1	1	1	1	1	1	4	1	1	1	1	1	1	1	1	1	1	1	1	1	2	1	1	1	1	1	1	1	1	1	1	1	1
1838	585	4694450	162091888	162091888_ 585	15	14	14	1	5	4	30	21	18	6	11	1	16	10	11	7	5	9	18	14	25	1	5	11	5	15	12	8	8	1	11	14	9	2	4	1	15	11	22
1839	715	5733267	162092453	162092453_ 715	9	10	13	9	20	7	2	1	1	6	1	1	7	7	3	1	1	1	34	1	31	1	1	1	1	1	1	1	1	1	1	1	1	1	1	1	1	1	1
1840	878	7045483	162098328	162098328_ 878	1	1	1	1	1	1	1	1	1	1	1	1	1	1	1	1	1	1	1	1	1	1	1	1	1	3	1	1	1	1	1	4	1	1	1	1	1	4	1
1841	377	3026350	162094406	162094406_ 377	1	1	1	1	1	1	5	1	1	1	1	1	5	1	1	9	1	1	1	1	4	1	1	1	1	1	1	1	1	1	3	1	1	1	1	1	1	1	1
1842	1164	9333350	162141174	162141174_1164	7	5	4	1	1	1	1	1	1	1	1	1	1	1	1	1	1	1	1	1	1	12	1	1	1	1	1	1	1	1	1	1	1	1	1	1	1	1	1
1843	322	2583850	163049393	163049393_ 322	1	1	1	1	1	1	1	1	1	1	1	1	8	1	4	1	1	1	1	1	1	1	1	1	3	1	1	1	2	1	1	2	1	1	1	1	1	1	1
1844	411	3297667	163050888	163050888_ 411	1	2	2	1	1	1	2	1	1	1	1	1	1	1	1	2	1	1	1	4	5	3	1	1	1	4	1	1	4	1	3	1	1	1	1	4	6	1	1
1845	733	5881367	163053009	163053009_ 733	1	3	1	1	1	1	1	1	1	1	1	1	1	1	1	3	1	1	1	1	3	2	4	1	1	1	1	4	2	1	2	1	1	6	1	1	1	1	1
1846	807	6470083	163057037	163057037_ 807	1	1	1	1	1	1	2	1	1	1	1	1	1	1	1	1	1	1	1	1	1	1	1	1	1	1	1	1	2	1	1	1	1	8	3	1	1	1	1
1847	475	3809433	163063538	163063538_ 475	1	1	1	1	1	1	5	1	1	1	1	1	1	1	1	2	1	1	1	1	1	1	1	1	1	1	1	1	2	1	1	1	1	1	1	1	1	1	1
1848	628	5035017	163072830	163072830_ 628	1	1	1	1	1	1	2	1	3	1	1	1	2	1	1	1	1	1	2	1	2	1	1	1	1	2	1	1	1	1	1	4	1	1	1	1	1	1	2
1849	823	6602983	163071854	163071854_ 823	1	1	1	1	1	1	3	3	1	1	1	1	3	2	1	1	1	1	1	1	2	1	1	1	1	1	1	1	1	1	1	1	1	1	1	1	1	1	1
1850	218	1754600	163087265	163087265_ 218	1	3	1	1	1	1	2	1	2	1	1	1	2	1	1	1	1	1	1	1	1	1	1	1	1	1	1	1	1	1	1	1	1	1	1	1	1	1	1
1851	475	3809433	163086197	163086197_ 475	3	1	1	1	1	1	1	2	1	1	1	1	1	1	3	1	1	1	1	1	3	1	1	1	2	3	2	1	1	1	1	3	1	1	1	2	4	5	4
1852	497	3988317	163080780	163080780_ 497	16	19	11	13	9	6	22	12	12	11	12	9	15	9	10	17	14	19	16	11	21	14	2	19	7	12	13	10	17	13	10	14	15	14	10	18	14	14	18
1853	108	869300	163089188	163089188_ 108	1	1	1	1	1	1	2	3	1	1	1	1	1	1	1	1	1	1	1	1	3	1	1	1	1	1	1	1	1	1	1	2	1	1	1	1	2	1	1
1854	350	2808900	163087921	163087921_ 350	7	7	11	6	1	1	22	11	5	6	7	1	9	4	1	22	8	1	11	3	12	26	14	29	17	12	3	29	24	20	34	18	10	30	8	27	53	26	10
1855	372	2987883	163088013	163088013_ 372	2	5	6	1	1	1	2	1	1	1	5	1	3	1	1	11	1	1	7	1	17	1	4	9	1	6	1	5	5	4	3	5	1	7	7	4	2	1	3
1856	336	2701167	163089279	163089279_ 336	1	3	1	1	1	1	1	1	1	1	1	1	2	1	1	3	1	1	1	1	1	1	1	6	1	1	1	3	1	1	1	1	1	1	3	1	1	1	1
1857	402	3228317	163090118	163090118_ 402	2	4	4	1	1	1	2	1	1	1	1	1	1	1	1	4	1	1	1	1	5	1	1	7	1	1	1	4	7	1	1	1	1	1	3	1	2	1	2
1858	578	4640584	163091537	163091537_ 578	2	3	1	1	1	1	1	1	1	1	1	1	1	1	1	1	1	1	1	1	1	1	1	1	1	2	1	3	1	1	1	2	1	2	1	1	1	1	1
1859	547	4392250	163091904	163091904_ 547	2	1	1	1	1	1	6	2	3	1	3	1	1	1	1	1	1	1	1	1	4	2	1	1	1	1	2	1	1	1	3	2	1	1	1	1	1	2	2
1860	721	5789033	163093826	163093826_ 721	1	2	1	2	1	1	1	1	1	1	1	1	1	1	1	1	1	1	5	1	1	1	1	5	1	1	1	1	1	1	1	1	1	1	1	1	1	1	1
1861	1322	10607100	163090912	163090912_1322	1	1	1	1	1	1	1	1	1	1	1	1	1	1	1	2	1	1	1	3	1	1	1	1	1	1	1	1	1	1	1	2	1	1	1	1	1	1	1
1862	1410	11303733	163090561	163090561_1410	1	1	1	1	1	1	1	1	1	1	1	1	1	1	1	1	1	1	1	7	1	1	1	1	1	5	4	1	1	5	33	10	9	1	1	1	1	1	4
1863	688	5515900	163113907	163113907_ 688	1	3	1	1	1	1	1	2	1	1	2	1	1	1	1	6	5	4	1	1	1	6	1	5	1	1	1	8	4	5	1	1	1	13	6	1	1	4	2
1864	896	7184083	163113922	163113922_ 896	6	1	1	2	1	1	1	1	1	1	1	1	1	1	1	2	2	3	1	1	1	4	3	1	1	1	1	4	3	4	1	1	1	6	1	4	1	1	2
1865	378	3034050	163119461	163119461_ 378	1	1	1	1	1	1	1	1	1	2	1	1	1	1	1	1	1	1	1	1	1	1	1	1	1	1	1	1	1	1	1	2	1	1	1	1	1	3	1
1866	450	3607467	163122101	163122101_ 450	11	10	10	1	1	1	12	5	5	1	6	1	17	8	5	5	4	1	15	12	17	4	1	8	5	16	1	7	8	1	16	16	12	8	8	5	16	18	11
1867	478	3832517	163124207	163124207_ 478	1	1	1	1	1	1	1	1	1	1	1	1	1	1	1	1	1	1	1	1	3	1	1	1	1	2	1	1	1	1	1	1	1	1	1	1	1	4	2
1868	1043	8363600	163121262	163121262_1043	8	5	3	1	1	2	1	1	1	1	1	1	1	1	1	1	1	1	1	1	1	1	1	1	1	1	1	1	1	1	1	1	1	2	1	1	7	1	1
1869	832	6672233	163146988	163146988_ 832	14	21	15	2	1	1	4	1	2	1	10	1	4	1	2	34	46	24	1	2	1	5	30	69	1	1	1	28	76	8	3	3	1	15	21	13	4	6	4
1870	843	6766467	163145370	163145370_ 843	2	10	6	1	1	1	1	1	1	1	4	1	1	1	1	11	11	1	1	1	1	1	1	24	1	1	1	4	19	1	1	1	1	4	1	4	1	3	1
1871	894	7168700	163146667	163146667_ 894	2	1	1	1	1	1	1	1	1	1	1	1	1	1	1	1	1	2	1	1	1	1	1	1	1	1	1	5	1	1	1	1	1	6	1	4	1	1	1
1872	985	7897917	163148163	163148163_ 985	6	7	8	1	1	1	1	1	1	1	1	1	1	1	1	1	1	1	1	1	1	2	1	1	1	1	1	2	1	1	1	1	1	1	1	1	1	1	1
1873	1164	9333350	163147079	163147079_1164	50	22	40	1	1	1	1	1	1	1	1	2	1	1	1	1	1	1	1	1	1	10	1	1	1	1	1	1	1	5	1	3	1	1	1	1	1	1	1
1874	629	5042717	163150421	163150421_ 629	4	5	7	1	1	1	1	1	1	1	1	1	1	1	1	1	1	1	1	1	1	1	1	1	1	1	1	1	2	1	1	1	1	1	1	1	1	1	1
1875	698	5602450	163150299	163150299_ 698	3	1	1	6	1	1	1	1	17	2	2	1	1	1	1	2	1	1	1	1	1	1	1	1	1	1	1	1	27	1	4	1	1	5	1	1	6	1	1
1876	819	6572200	163146057	163146057_ 819	1	1	19	3	1	3	1	1	1	1	4	1	1	1	1	1	3	3	1	1	1	1	1	10	1	1	1	1	5	1	1	1	1	1	1	1	1	1	1
1877	1137	9115800	163150070	163150070_1137	117	103	96	1	1	1	1	1	1	22	26	37	63	63	49	1	1	2	1	1	1	89	1	1	1	1	1	1	1	3	1	1	1	1	1	1	2	1	1
1878	1207	9683416	163150436	163150436_1207	28	52	23	3	1	1	1	1	4	1	1	4	16	11	6	2	1	1	1	2	1	103	1	1	1	1	1	1	10	4	1	2	1	1	1	1	1	1	1
1879	1272	10203067	163149765	163149765_1272	154	147	8	2	4	1	1	1	22	10	16	11	17	4	18	3	3	2	1	5	1	36	1	3	1	1	1	1	31	6	6	9	1	1	1	2	14	1	4
1880	1290	10341583	163149658	163149658_1290	125	97	143	20	14	8	20	14	92	37	79	99	55	41	55	19	6	2	14	9	11	157	14	9	3	11	4	11	77	8	18	9	5	11	8	11	17	10	11
1881	1342	10761000	163150986	163150986_1342	4	5	1	2	1	1	1	7	5	1	1	1	2	1	4	2	1	1	1	1	1	7	1	1	1	1	1	1	1	2	1	3	1	1	1	1	1	1	1
1882	1390	11149734	163149261	163149261_1390	6	6	11	21	1	1	2	9	28	1	1	1	1	1	5	3	1	3	1	1	1	11	1	1	1	1	2	2	27	3	25	2	1	2	1	1	15	1	1
1883	1380	11063200	163149643	163149643_1380	9	1	1	11	1	1	1	2	14	1	1	1	1	1	2	2	1	2	1	1	1	1	1	1	1	1	2	1	1	2	1	2	1	1	1	1	4	1	1
1884	1408	11288250	163147568	163147568_1408	1	1	1	3	1	1	1	1	4	1	1	1	1	1	2	1	1	1	1	1	1	1	1	1	1	1	1	1	1	1	1	1	1	1	1	1	1	1	1
1885	1460	11707850	163150421	163150421_1460	15	12	15	17	12	5	17	18	18	12	3	20	16	1	20	2	1	1	6	1	12	6	4	1	7	17	5	8	9	12	14	6	5	4	1	13	19	9	15
1886	1603	12856300	163989227	163989227_1603	1	6	1	1	2	2	1	1	1	2	4	9	6	7	2	1	11	1	1	7	6	3	4	6	1	4	2	6	2	4	4	1	4	1	3	4	1	1	6
1887	1573	12615867	163991577	163991577_1573	7	8	7	24	17	22	24	20	21	12	12	11	11	10	8	1	7	1	8	10	7	4	4	9	4	6	6	8	3	6	7	1	8	9	4	6	11	4	10
1888	1622	13012200	163991394	163991394_1622	7	7	1	15	11	8	4	1	16	18	15	14	13	16	6	1	13	1	8	8	5	10	6	10	4	8	9	8	3	9	7	1	8	5	6	8	9	5	7
1889	1607	12887083	163992661	163992661_1607	2	3	1	11	3	1	1	1	10	15	12	13	16	18	2	1	10	1	11	7	4	7	1	7	2	7	9	11	1	7	1	1	7	3	3	6	6	2	9
1890	1654	13268033	163991653	163991653_1654	1	1	1	4	1	1	1	1	1	8	6	6	7	13	1	1	3	1	7	7	6	2	1	5	2	5	3	8	1	5	1	1	4	1	2	3	2	1	6
1891	1573	12615867	163995239	163995239_1573	1	1	1	2	1	1	1	1	1	1	1	2	1	1	1	1	4	1	1	5	1	1	5	5	1	1	1	5	1	7	1	1	3	1	1	4	1	1	6
1892	1667	13368067	164004456	164004456_1667	1	1	1	1	1	1	1	1	1	1	3	1	1	1	1	1	5	1	1	9	3	3	1	1	1	1	1	2	1	2	1	1	1	1	1	1	1	1	1
1893	414	3320850	164018478	164018478_ 414	1	3	1	1	1	1	8	3	4	1	1	1	4	1	4	1	1	1	5	1	7	1	1	1	1	1	1	1	1	1	1	1	1	1	1	1	5	3	5
1894	506	4057567	164018219	164018219_ 506	1	6	5	1	3	1	17	1	12	3	1	1	8	1	1	4	1	1	15	10	11	1	1	5	3	8	1	1	6	1	4	1	5	1	1	4	1	5	6
1895	444	3561300	164071701	164071701_ 444	24	20	21	45	64	26	40	23	22	27	75	20	34	28	20	15	16	25	19	11	15	12	22	42	1	5	8	25	37	21	5	9	7	11	14	9	5	1	8
1896	598	4794483	164071884	164071884_ 598	3	2	1	4	10	9	4	1	1	1	6	1	1	1	2	3	1	3	5	1	1	3	4	2	1	1	2	1	3	1	1	1	1	4	1	6	1	1	1
1897	789	6331567	164072113	164072113_ 789	1	1	1	3	16	9	1	1	1	1	1	1	1	1	1	1	1	1	1	1	1	1	1	1	1	1	1	1	1	1	1	1	1	1	1	1	1	1	1
1898	350	2808900	164083908	164083908_ 350	1	2	1	2	1	1	1	1	1	1	1	1	1	1	1	1	1	1	1	1	1	1	1	1	1	1	1	1	1	1	1	2	1	1	1	1	6	1	1
1899	490	3934450	164073257	164073257_ 490	9	14	10	7	15	7	2	1	4	14	38	16	1	1	1	22	20	11	1	1	1	16	27	13	1	1	1	3	38	9	1	1	1	16	19	16	1	1	1
1900	499	4003700	164074875	164074875_ 499	1	1	3	1	1	1	1	1	1	1	1	1	1	1	1	4	1	3	1	1	1	1	1	3	1	1	1	1	5	1	1	1	1	1	1	1	1	1	1
1901	110	884700	164093597	164093597_ 110	58	49	58	28	19	16	18	9	14	46	85	61	49	16	33	85	96	91	51	47	75	96	120	141	27	61	56	134	153	127	65	74	64	142	112	140	84	87	79
1902	157	1265833	164088135	164088135_ 157	1	1	4	1	1	8	4	1	4	1	1	2	1	1	1	1	1	1	1	1	1	1	1	1	1	1	1	1	1	1	1	1	1	1	1	1	1	1	1
1903	161	1296617	164093353	164093353_ 161	59	62	53	17	17	12	18	7	14	39	79	43	34	33	25	81	71	82	48	28	58	80	80	134	23	41	45	111	144	92	45	59	46	110	79	101	71	60	65
1904	139	1117733	164090515	164090515_ 139	2	1	4	1	1	7	14	1	8	1	2	9	1	1	18	7	1	1	7	2	1	1	96	1	20	3	4	2	2	1	1	1	4	1	2	1	7	1	6
1905	186	1498583	164093384	164093384_ 186	190	199	206	29	23	18	96	45	53	49	67	41	89	83	51	71	58	76	91	63	141	88	102	154	45	74	85	130	142	113	81	96	99	130	83	157	109	110	141
1906	348	2793517	164095627	164095627_ 348	6	6	8	1	1	1	7	10	5	1	2	1	7	4	1	3	1	1	1	1	9	1	1	1	1	1	1	1	1	1	1	2	1	1	1	1	1	1	2
1907	451	3624750	164109024	164109024_ 451	1	1	1	1	1	1	1	1	1	1	1	1	1	1	1	3	1	1	1	1	2	1	2	1	1	1	1	1	1	1	1	1	1	4	1	1	1	1	1
1908	488	3919067	164109344	164109344_ 488	1	1	1	4	3	1	1	1	1	1	8	3	1	1	1	9	8	6	1	1	1	1	5	7	1	1	1	1	9	1	1	2	1	7	1	6	1	1	1
1909	510	4088350	164110336	164110336_ 510	1	1	1	1	1	1	1	1	1	1	1	1	1	1	1	4	4	5	1	1	1	1	3	1	1	1	1	1	6	1	1	1	1	1	1	1	1	1	1
1910	564	4523167	164108170	164108170_ 564	6	1	5	4	5	3	6	6	5	4	1	1	6	1	1	6	3	5	5	1	1	1	3	5	1	6	1	6	7	1	1	6	2	1	1	1	6	1	3
1911	659	5283150	164106735	164106735_ 659	1	1	1	4	1	1	1	1	1	1	1	1	1	1	1	1	1	1	1	1	1	1	1	1	1	1	1	3	1	1	1	1	1	1	1	3	1	1	1
1912	862	6912683	164107224	164107224_ 862	1	1	1	1	1	1	1	1	1	1	1	1	1	1	1	4	1	3	1	1	1	4	1	1	1	1	1	7	1	1	1	2	1	1	4	3	1	1	1
1913	1333	10691750	164108307	164108307_1333	3	1	1	6	1	1	1	1	22	1	1	1	1	1	1	1	1	1	1	1	1	1	1	1	1	1	1	1	21	1	1	1	1	1	1	1	7	1	1
1914	833	6679934	164150803	164150803_ 833	1	1	1	1	1	1	1	1	1	1	1	1	1	1	1	4	1	3	1	1	1	1	1	11	1	1	1	3	9	1	1	1	1	1	1	2	1	1	1
1915	1136	9108117	164151199	164151199_1136	15	17	14	1	1	1	1	1	1	1	1	5	8	5	5	1	1	1	1	1	1	9	1	1	1	1	1	1	1	1	1	1	1	1	1	1	1	1	1
1916	1162	9317866	164152298	164152298_1162	1	3	6	1	1	1	1	1	1	1	1	1	1	1	1	1	1	1	1	1	1	3	1	1	1	1	1	1	1	1	1	1	1	1	1	1	1	1	1
1917	1164	9333350	164150024	164150024_1164	7	3	5	1	1	1	1	1	1	1	1	1	1	1	1	1	1	1	1	1	1	12	1	1	1	1	1	1	1	1	1	1	1	1	1	1	1	1	1
1918	1271	10195383	164150192	164150192_1271	18	18	20	1	1	1	1	1	1	1	1	1	1	1	1	1	1	1	1	1	1	12	1	1	1	1	1	1	2	1	1	1	1	1	1	1	1	1	1
1919	1287	10318500	164153946	164153946_1287	1	10	15	1	1	1	1	1	1	1	1	1	1	1	1	1	1	1	1	1	1	1	1	1	1	1	1	1	15	1	1	1	1	1	1	1	1	1	1
1920	1292	10366567	164153397	164153397_1292	12	13	11	2	1	1	1	1	14	5	8	13	4	4	5	1	1	2	1	1	1	21	1	1	1	1	1	1	10	1	1	1	1	1	1	1	1	1	1
1921	1338	10730217	164154922	164154922_1338	1	1	1	2	1	1	1	1	10	1	1	1	1	1	1	1	1	1	1	1	1	1	1	1	1	1	1	1	1	1	2	1	1	1	1	1	1	1	1
1922	440	3530517	165019852	165019852_ 440	1	1	1	1	1	1	1	1	1	1	1	1	1	1	1	1	1	1	1	1	1	1	1	4	1	1	1	4	1	1	1	2	1	1	1	1	1	1	1
1923	593	4756000	165023499	165023499_ 593	4	6	8	1	1	3	1	1	1	5	4	1	1	1	1	4	1	1	1	1	1	1	4	3	1	1	1	1	1	4	1	2	1	6	1	3	1	1	7
1924	665	5338917	165056427	165056427_ 665	2	1	1	10	11	7	1	1	1	1	4	1	1	1	1	1	1	4	1	1	1	1	1	1	1	1	2	1	1	1	2	1	1	1	1	1	1	1	2
1925	769	6168067	165055481	165055481_ 769	1	1	1	1	1	1	11	1	6	1	1	1	1	1	1	1	1	1	1	1	8	1	1	1	1	1	1	1	1	1	1	1	1	1	1	1	7	1	1
1926	113	907783	165069489	165069489_ 113	9	14	10	1	3	4	1	1	1	1	11	10	5	1	1	19	19	24	1	1	1	32	30	36	6	12	4	50	44	29	15	16	2	38	33	27	10	15	1
1927	145	1163900	165070419	165070419_ 145	4	1	1	1	1	1	1	1	1	3	1	3	1	1	1	9	1	1	1	1	1	1	1	1	1	1	1	1	1	1	1	1	1	1	1	8	1	1	1
1928	146	1171600	165070450	165070450_ 146	6	6	1	1	1	1	1	1	1	6	6	8	1	1	1	22	1	10	1	1	1	9	11	18	2	3	1	4	1	7	15	4	1	40	10	24	1	5	1
1929	159	1281217	165068390	165068390_ 159	18	16	17	3	1	2	1	1	1	14	14	5	1	1	1	27	17	26	2	1	4	36	36	49	5	16	1	58	63	26	19	18	3	53	36	23	15	19	8
1930	358	2870467	165069061	165069061_ 358	1	1	1	1	1	1	1	1	1	1	1	1	1	1	1	1	1	1	1	1	1	1	1	6	1	1	1	11	1	2	1	1	1	6	1	1	1	1	1
1931	366	2941617	165068970	165068970_ 366	4	5	1	1	1	1	1	1	1	2	4	1	1	1	1	10	4	1	1	1	1	6	5	12	1	1	1	14	16	5	1	2	1	10	5	1	3	2	2
1932	1324	10622500	165067429	165067429_1324	1	2	1	1	1	1	1	1	1	1	1	1	2	1	1	6	4	11	1	1	1	1	5	6	1	1	1	1	1	1	1	1	1	1	1	1	1	1	1
1933	1388	11134350	165068893	165068893_1388	4	1	5	4	1	1	1	1	1	6	12	9	1	1	1	9	12	7	1	1	1	17	18	24	1	3	1	15	1	8	6	2	1	8	4	6	1	5	1
1934	442	3545900	165080307	165080307_ 442	3	1	1	1	5	1	1	1	1	4	1	1	3	3	1	1	3	1	1	1	3	1	2	3	1	1	1	1	4	1	1	1	1	1	1	1	1	1	1
1935	186	1498583	165094833	165094833_ 186	17	19	19	1	1	4	3	5	3	4	4	3	10	7	5	9	2	5	4	6	12	8	1	14	3	9	10	12	11	11	9	6	12	1	8	12	11	11	9
1936	623	4996550	165092529	165092529_ 623	7	9	6	8	6	4	1	1	1	8	18	12	1	1	1	10	9	9	3	1	3	8	9	8	1	1	1	6	7	6	1	2	1	1	6	3	3	1	1
1937	921	7386150	165093185	165093185_ 921	1	1	1	1	1	1	1	1	1	1	1	1	1	1	1	1	1	1	1	1	1	1	1	3	1	1	1	3	1	1	1	1	1	1	1	1	1	2	1
1938	345	2770433	165102921	165102921_ 345	1	1	1	1	1	1	4	2	3	1	1	1	4	2	1	1	1	3	1	1	1	1	1	5	1	1	1	1	1	1	1	1	1	1	1	1	2	1	1
1939	921	7386150	165123993	165123993_ 921	1	1	1	1	1	1	1	1	1	1	1	1	1	1	1	1	1	1	1	1	1	1	4	1	1	1	1	4	1	1	1	1	1	7	1	3	1	1	4
1940	1044	8371300	165123184	165123184_1044	8	1	5	1	1	1	1	1	1	1	1	1	1	1	1	1	1	1	1	1	1	1	1	1	1	1	1	1	1	1	1	1	1	1	1	1	2	1	1
1941	1163	9325650	165124939	165124939_1163	37	43	33	1	1	1	1	1	3	1	1	3	9	14	6	1	1	1	1	1	1	39	1	1	1	1	1	1	1	1	1	1	1	1	1	1	3	1	1
1942	1207	9683416	165123779	165123779_1207	14	9	14	1	1	1	1	1	1	1	1	1	1	1	1	1	1	1	1	1	1	3	1	1	1	1	1	1	1	1	1	1	1	1	1	1	1	1	1
1943	1324	10622500	165129715	165129715_1324	1	1	1	7	1	1	1	2	13	1	1	1	1	1	1	1	1	1	1	1	1	1	1	1	1	1	2	1	11	1	6	1	1	1	1	1	6	1	1
1944	470	3770967	165137878	165137878_ 470	5	4	5	5	1	1	6	1	4	1	5	3	1	5	1	4	1	6	5	1	7	1	1	3	1	1	1	3	1	4	4	5	3	1	3	4	1	4	5
1945	488	3919067	165139313	165139313_ 488	14	11	10	10	7	5	18	14	12	10	9	8	17	13	1	12	1	9	15	12	12	10	9	9	8	1	6	8	9	8	11	11	11	8	8	10	8	13	12
1946	980	7859433	165132019	165132019_ 980	3	3	5	1	1	1	1	1	1	1	1	2	1	1	1	1	1	1	1	1	1	1	1	1	1	1	1	1	1	1	1	1	1	1	1	1	1	1	1
1947	1337	10722533	165131348	165131348_1337	1	1	4	4	1	1	1	1	10	1	1	1	1	1	1	1	1	1	1	1	1	1	1	1	1	1	1	1	8	1	1	1	1	1	1	1	1	1	1
1948	1391	11157434	165131638	165131638_1391	1	1	1	5	1	1	1	1	1	1	1	1	1	1	1	1	1	1	1	1	1	1	1	1	1	1	1	1	10	1	1	1	1	1	1	1	6	1	1
1949	407	3266900	165139709	165139709_ 407	1	3	4	1	1	1	13	5	4	1	1	1	9	1	1	1	1	1	6	1	10	1	1	1	1	3	1	1	2	1	1	1	1	1	1	3	5	1	5
1950	1227	9837417	165141968	165141968_1227	1	1	3	1	1	1	1	1	1	1	1	1	2	1	1	1	1	1	1	1	1	13	1	1	1	1	1	1	1	1	1	1	1	1	1	1	1	1	1
1951	487	3911367	165146286	165146286_ 487	1	1	1	1	1	1	1	5	2	1	1	5	1	1	1	1	6	1	1	1	1	1	1	1	1	1	1	1	1	1	1	1	1	1	1	1	1	1	1
1952	1138	9123500	165164825	165164825_1138	13	13	15	1	1	1	1	1	1	3	1	8	9	10	6	1	1	1	1	1	1	1	1	1	1	1	1	1	1	1	1	1	1	1	1	1	1	1	1
1953	1163	9325650	165165802	165165802_1163	27	27	28	1	1	1	1	1	2	1	1	1	6	7	1	1	1	1	1	1	1	67	1	1	1	1	1	1	4	1	1	1	1	1	1	1	1	1	1
1954	1225	9822033	165163986	165163986_1225	1	11	12	1	1	1	1	1	1	1	1	1	1	1	1	1	1	1	1	1	1	13	1	1	1	1	1	1	1	1	1	1	1	1	1	1	1	1	1
1955	1272	10203067	165165680	165165680_1272	28	30	29	3	1	1	1	1	4	3	4	4	1	1	4	5	1	2	1	1	1	10	1	1	1	1	1	1	13	1	1	1	1	1	1	1	1	1	1
1956	1289	10333883	165165100	165165100_1289	45	48	47	5	4	1	4	3	9	6	12	15	14	6	10	3	3	2	5	2	4	57	1	2	1	1	1	1	12	2	4	3	1	1	1	3	3	1	4
1957	1334	10699433	165166275	165166275_1334	1	1	1	3	1	1	1	1	1	1	1	1	1	1	1	1	1	1	1	1	1	2	1	1	1	1	3	1	8	1	1	2	1	1	1	1	2	1	1
1958	1391	11157434	165165588	165165588_1391	1	1	1	4	2	1	1	3	6	1	1	1	1	1	1	1	1	1	1	1	1	1	1	1	1	1	1	1	7	1	1	1	1	1	1	1	4	1	1
1959	1467	11761717	165165985	165165985_1467	4	1	1	2	1	1	1	1	1	3	3	1	1	1	3	2	1	2	1	1	1	1	1	1	1	2	1	1	1	1	1	1	1	1	1	1	3	1	3
1960	1003	8046117	165987259	165987259_1003	1	1	1	1	1	1	1	2	2	1	1	2	2	1	2	1	1	1	2	3	1	2	2	1	4	3	2	1	1	1	2	1	1	1	1	1	1	1	2
1961	998	8007550	165989212	165989212_ 998	1	1	1	1	1	1	1	2	2	1	1	1	1	1	2	1	1	1	2	2	2	2	1	1	3	3	1	2	1	1	1	1	1	1	1	2	1	1	2
1962	1584	12700500	165992569	165992569_1584	24	22	20	61	52	48	46	47	43	49	49	45	47	47	48	43	49	50	44	45	44	41	46	40	42	38	44	38	42	34	36	36	33	35	29	30	30	36	29
1963	1083	8690583	165992111	165992111_1083	1	1	1	1	1	1	1	1	1	1	1	1	1	1	3	1	1	1	1	2	1	1	1	1	2	2	1	1	1	1	1	1	1	1	1	1	1	1	1
1964	1111	8915733	165994781	165994781_1111	1	1	1	1	1	1	1	3	2	1	3	2	1	1	2	1	4	1	1	2	3	2	4	2	4	2	1	2	1	1	1	1	1	2	1	1	1	1	3
1965	1119	8977300	165993988	165993988_1119	1	1	1	1	1	1	1	2	1	1	1	1	1	1	2	1	2	1	1	3	1	1	1	1	3	2	1	1	1	1	1	1	1	1	1	1	1	1	1
1966	1164	9333350	165993942	165993942_1164	1	1	1	1	1	1	1	2	2	1	1	1	1	1	3	1	1	1	2	1	3	1	1	1	3	2	1	1	1	1	1	1	1	1	1	1	2	1	1
1967	1578	12654333	165995132	165995132_1578	1	4	1	1	1	1	1	1	1	1	1	1	1	1	1	1	1	1	1	1	3	1	1	1	1	1	1	1	1	1	1	1	1	2	1	1	1	1	1
1968	1587	12723583	165992371	165992371_1587	1	9	6	1	6	1	4	1	5	3	1	5	8	5	6	1	2	1	1	1	35	4	7	4	5	5	14	2	12	4	1	1	3	17	1	1	5	11	4
1969	1609	12902467	165994370	165994370_1609	1	6	1	1	1	1	3	4	3	1	1	3	4	3	6	1	1	1	1	3	8	1	1	2	3	3	3	2	7	1	1	1	2	7	1	1	2	2	4
1970	1644	13181483	165992615	165992615_1644	1	1	1	1	1	1	1	4	1	1	1	3	1	1	3	1	1	1	1	1	1	1	1	2	2	2	1	2	1	1	1	1	1	1	1	1	2	1	3
1971	980	7859433	166002441	166002441_ 980	1	1	1	1	1	1	1	1	2	1	2	2	1	1	1	1	1	1	1	3	1	1	2	2	2	2	1	1	1	1	1	1	1	1	1	1	1	1	1
1972	500	4011400	166033203	166033203_ 500	1	1	6	1	1	1	11	6	9	1	1	1	14	13	17	2	1	1	21	14	23	1	1	1	10	16	18	3	1	3	20	24	26	1	1	1	31	28	33
1973	555	4453917	166032806	166032806_ 555	1	1	1	1	1	1	12	7	6	1	1	1	1	1	1	1	1	1	6	5	10	1	1	6	1	1	1	2	1	1	1	2	1	1	1	1	3	1	3
1974	841	6751083	166030151	166030151_ 841	4	1	1	2	1	1	1	1	1	1	2	1	1	3	1	1	1	1	1	1	1	1	2	1	1	1	1	1	1	1	1	1	1	1	1	1	1	1	1
1975	108	869300	166073547	166073547_ 108	22	23	25	12	11	11	25	28	32	15	32	16	26	17	16	18	17	15	17	17	25	23	16	24	10	15	12	26	38	23	21	12	13	23	15	16	22	20	13
1976	116	930867	166074173	166074173_ 116	7	3	1	1	1	1	1	1	1	1	1	1	1	1	1	1	1	1	1	1	1	1	3	6	1	1	1	1	1	1	1	1	1	1	4	5	1	5	1
1977	136	1094550	166072449	166072449_ 136	4	7	5	5	7	2	7	13	16	3	12	6	16	8	4	7	1	1	6	5	5	1	6	8	1	1	5	9	10	5	1	3	3	7	8	8	7	5	6
1978	177	1419733	166073364	166073364_ 177	9	7	5	2	1	1	1	1	3	1	1	1	3	2	1	5	1	1	2	1	3	1	7	13	1	1	6	10	5	7	1	2	2	9	5	10	1	4	1
1979	159	1281217	166073563	166073563_ 159	3	1	1	1	1	1	1	1	1	1	1	1	1	1	1	1	1	1	1	1	1	1	1	7	1	1	1	1	1	1	1	1	1	1	3	5	1	1	1
1980	337	2708867	166086044	166086044_ 337	1	1	1	1	1	1	2	1	1	1	1	1	1	1	1	1	1	1	1	1	1	1	1	1	1	1	1	1	1	1	1	1	3	1	1	1	1	1	7
1981	403	3236017	166082230	166082230_ 403	1	1	1	1	1	1	1	1	1	1	1	1	1	1	1	2	1	1	1	1	1	1	1	4	1	1	1	2	3	1	1	1	1	1	1	1	1	1	1
1982	434	3484350	166084778	166084778_ 434	1	1	4	3	1	1	1	1	1	2	4	3	2	1	1	1	1	3	1	1	1	1	3	5	1	1	1	1	9	2	1	1	1	1	1	1	1	1	1
1983	564	4523167	166084259	166084259_ 564	1	2	1	1	1	1	5	1	1	1	1	1	1	1	1	1	1	3	2	2	1	1	1	1	1	1	1	2	1	2	1	3	3	3	1	1	2	4	3
1984	984	7890217	166087906	166087906_ 984	1	2	1	1	1	1	1	1	1	1	2	1	1	1	1	1	1	1	1	1	1	1	1	1	1	1	1	1	1	1	1	1	1	1	1	1	2	1	1
1985	460	3694017	166125793	166125793_ 460	4	5	4	1	1	1	1	1	1	1	1	1	1	4	1	1	1	1	1	1	1	1	5	1	1	1	4	1	1	1	1	3	1	1	3	1	6	1	1
1986	487	3911367	166123413	166123413_ 487	11	12	9	5	6	5	18	12	12	9	18	5	15	16	12	13	7	8	13	8	12	9	6	12	6	7	10	7	16	9	7	17	7	9	6	9	12	10	25
1987	489	3926767	166126816	166126816_ 489	1	1	1	1	1	1	1	1	1	1	1	1	1	1	1	1	1	1	1	1	1	1	1	1	1	1	1	9	1	1	4	1	1	1	1	1	7	1	1
1988	1163	9325650	166131683	166131683_1163	6	1	4	1	1	1	1	1	1	1	1	1	2	1	1	1	1	1	1	1	1	3	1	1	1	1	1	1	1	1	1	1	1	1	1	1	1	1	1
1989	1288	10326183	166171036	166171036_1288	7	1	4	1	1	1	1	1	1	1	1	1	1	1	1	1	1	1	1	1	1	8	1	1	1	1	1	1	1	1	1	1	1	1	1	1	1	1	1
1990	1588	12731283	167000336	167000336_1588	1	1	1	8	1	3	1	1	1	1	1	1	3	1	1	2	11	2	4	1	1	1	1	1	1	1	1	4	1	1	1	1	2	4	1	1	1	1	1
1991	1584	12700500	167009491	167009491_1584	13	13	16	14	15	12	11	11	14	12	11	15	13	14	4	15	14	4	7	11	4	10	10	3	12	1	11	13	12	13	10	14	6	10	17	10	10	7	14
1992	348	2793517	167019165	167019165_ 348	1	1	1	1	1	1	1	1	1	1	1	1	1	1	1	1	1	1	1	1	1	1	2	1	1	1	2	1	2	1	1	1	1	1	1	1	1	1	1
1993	1574	12623550	167014297	167014297_1574	1	1	1	3	2	1	1	1	3	2	1	1	1	1	1	1	1	1	2	1	1	1	1	1	1	1	2	1	1	2	1	6	1	1	1	3	1	5	1
1994	1425	11428850	167034470	167034470_1425	14	10	9	10	9	13	10	10	13	13	9	14	11	1	13	7	1	7	11	9	9	9	7	10	5	11	1	9	1	10	11	6	8	7	11	7	19	1	8
1995	499	4003700	167040619	167040619_ 499	1	1	1	1	1	1	1	1	1	1	1	1	2	1	1	1	1	1	3	1	1	1	1	1	1	1	1	1	1	1	3	1	1	3	1	1	1	3	3
1996	109	877000	167068939	167068939_ 109	1	1	1	1	1	2	1	1	1	1	1	1	4	1	1	1	5	1	1	1	1	1	1	1	1	1	1	1	1	1	1	1	3	1	1	1	1	1	1
1997	593	4756000	167076263	167076263_ 593	1	1	1	1	1	1	1	1	1	1	1	1	3	1	1	1	2	3	1	1	1	1	1	1	1	1	1	1	2	1	1	1	1	1	1	3	1	1	1
1998	620	4973467	167075241	167075241_ 620	1	1	1	2	1	1	3	1	1	2	1	6	6	1	1	3	4	9	1	1	1	3	4	3	1	1	1	9	3	5	1	3	1	3	1	7	1	1	1
1999	630	5050416	167071533	167071533_ 630	5	5	8	4	5	1	15	5	6	4	14	4	4	4	4	7	8	6	7	8	12	6	9	9	1	1	4	6	12	7	1	8	6	5	1	5	7	1	7
[truncated: 40,394 more rows]
